# Supplementary material for: Product-selectivity control by the nature of the catalyst: Lewis acid-catalyzed selective formation of ring-fused tetrahydroquinolines and tetrahydroazepines via intramolecular redox reaction
Source: Royal Society of Chemistry journal article supplement (doi:10.1039/c0cc01946a), 2010-01-01

## Supporting information

### **Product-Selectivity Control by the Nature of Catalyst: Lewis Acid-Catalyzed Selective Formations of Ring-fused Tetrahydroquinolines and Tetrahydroazepines via Intramolecular Redox Reaction**

Guanghua Zhou,<sup>a</sup> and Junliang Zhang<sup>\*a,b</sup>

<sup>a</sup> Shanghai Key Laboratory of Green Chemistry and Chemical Processes Department  
of Chemistry East China Normal University 3663 N. Zhongshan Road,  
Shanghai 200062 (P. R. China)

<sup>b</sup> State Key Laboratory of Organometallic Chemistry, Shanghai Institute of Organic  
Chemistry, Chinese Academy of Sciences, 354 Fenglin Road,  
Shanghai 200032, (P. R. China).

Fax: (+86)21-6223-5039

E-mail: [jlzhang@chem.ecnu.edu.cn](mailto:jlzhang@chem.ecnu.edu.cn)

**Table 1.** Screening the reaction conditions of tuning the product selectivity.

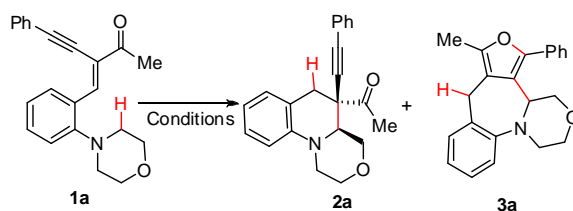

| Entry     | Conditions <sup>a</sup>                                                              | Yield (%) <sup>b</sup> |               |
|-----------|--------------------------------------------------------------------------------------|------------------------|---------------|
|           |                                                                                      | <b>2a</b>              | <b>3a</b>     |
| 1         | 10 mol% In(OTf) <sub>3</sub> , DCE, MS, reflux, 31 h                                 | < 5                    | 7             |
| 2         | 10 mol% Mg(OTf) <sub>2</sub> , DCE, MS, reflux, 22 h                                 | 0                      | 0             |
| 3         | 10 mol% Cu(OTf) <sub>2</sub> , DCE, MS, reflux, 31 h                                 | --                     | 11            |
| 4         | 10 mol% Ni(ClO <sub>4</sub> ) <sub>2</sub> ·6H <sub>2</sub> O, DCE, MS, reflux, 16 h | < 5                    | < 5           |
| 5         | 10 mol% Y(OTf) <sub>3</sub> , DCE, MS, reflux, 31 h                                  | 43                     | 8             |
| 6         | 10 mol% Yb(OTf) <sub>3</sub> , DCE, MS, reflux, 31 h                                 | 28                     | 10            |
| 7         | 10 mol% Bi(OTf) <sub>3</sub> , DCE, MS, reflux, 22 h                                 | < 5                    | 63            |
| 8         | 10 mol% Sc(OTf) <sub>3</sub> , DCE, MS, reflux, 35 h                                 | 80 <sup>c</sup>        | < 5           |
| <b>9</b>  | <b>10 mol% Sc(OTf)<sub>3</sub>, DCE, reflux, 35 h</b>                                | <b>86<sup>d</sup></b>  | <b>&lt; 5</b> |
| 10        | 10 mol% Sc(OTf) <sub>3</sub> , DCM, MS, reflux, 35 h                                 | 29                     | < 5           |
| 11        | 10 mol% Sc(OTf) <sub>3</sub> , TCE, MS, 80 °C, 36 h                                  | 43                     | < 5           |
| 12        | 10 mol% Sc(OTf) <sub>3</sub> , CHCl <sub>3</sub> , MS, reflux, 24 h                  | 55                     | 25            |
| 13        | 10 mol% Sc(OTf) <sub>3</sub> , toluene, MS, 80 °C, 22 h                              | 57                     | < 5           |
| 14        | 10 mol% Sc(OTf) <sub>3</sub> , CH <sub>3</sub> CN, MS, reflux, 35 h                  | 0                      | 0             |
| 15        | 5 mol% IPrAuCl/AgOTf, DCE, RT, 5 h                                                   | 0                      | 92            |
| <b>16</b> | <b>5 mol% IPrAuCl/AgOTf, CH<sub>3</sub>CN, RT, 3 h</b>                               | <b>0</b>               | <b>92</b>     |
| 17        | 5 mol% IPrAuCl/AgOTf, toluene, RT, 10 h                                              | 0                      | 89            |
| 18        | 5 mol% IPrAuCl/AgSbF <sub>6</sub> , CH <sub>3</sub> CN, RT, 6 h                      | 0                      | 79            |
| 19        | 5 mol% PPh <sub>3</sub> AuCl/AgSbF <sub>6</sub> , CH <sub>3</sub> CN, RT, 1 h        | 0                      | 64            |
| 20        | 5 mol% PPh <sub>3</sub> AuCl/AgOTf, CH <sub>3</sub> CN, RT, 4 h                      | 0                      | 71            |
| 21        | 5 mol% AuCl, CH <sub>3</sub> CN, RT, 11.5 h                                          | 0                      | 81            |

<sup>a</sup> Unless otherwise specified, the reaction was run with a 0.2-0.3 mmol scale (0.1 M) with (25-38 mg) or without 4Å molecular sieves. DCE = 1,2-dichloroethane, TCE = 1,1,2,2-tetrachloroethane;  
<sup>b</sup> isolated yield; <sup>c</sup> dr = 12:1; <sup>d</sup> dr = 15:1.

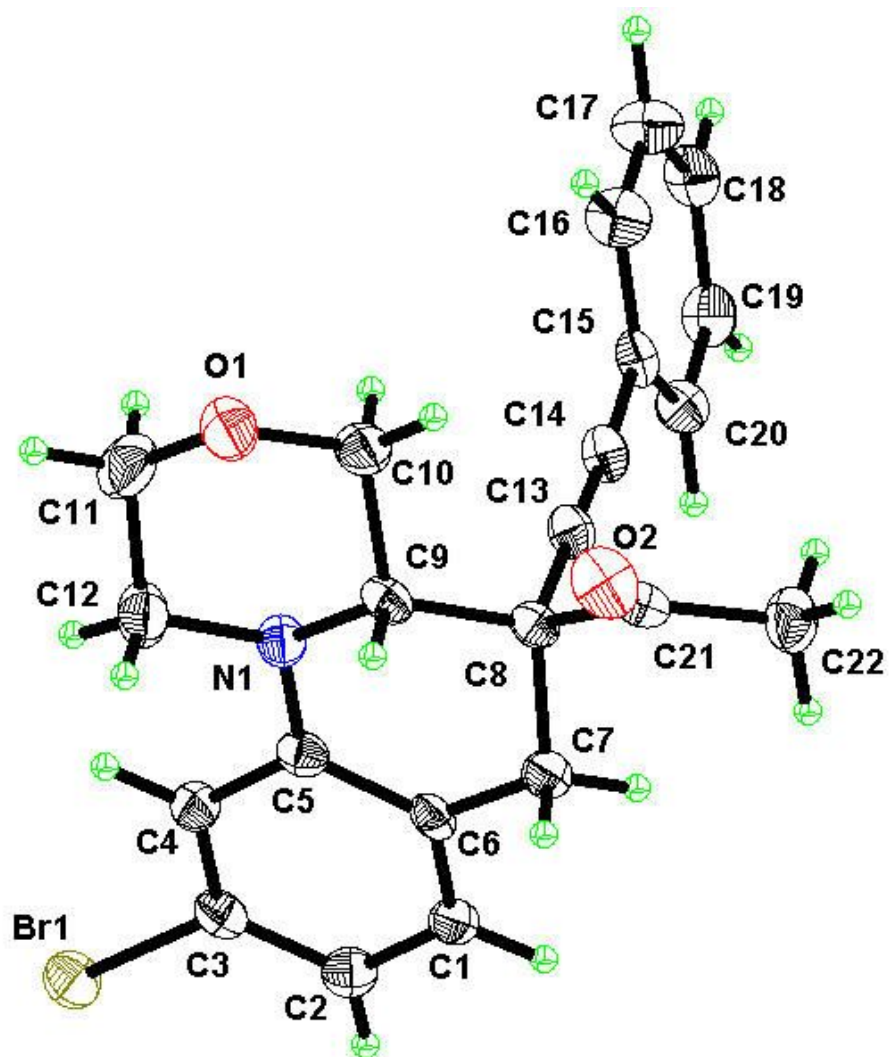

Figure 1. X-ray crystal structure of compound 2n

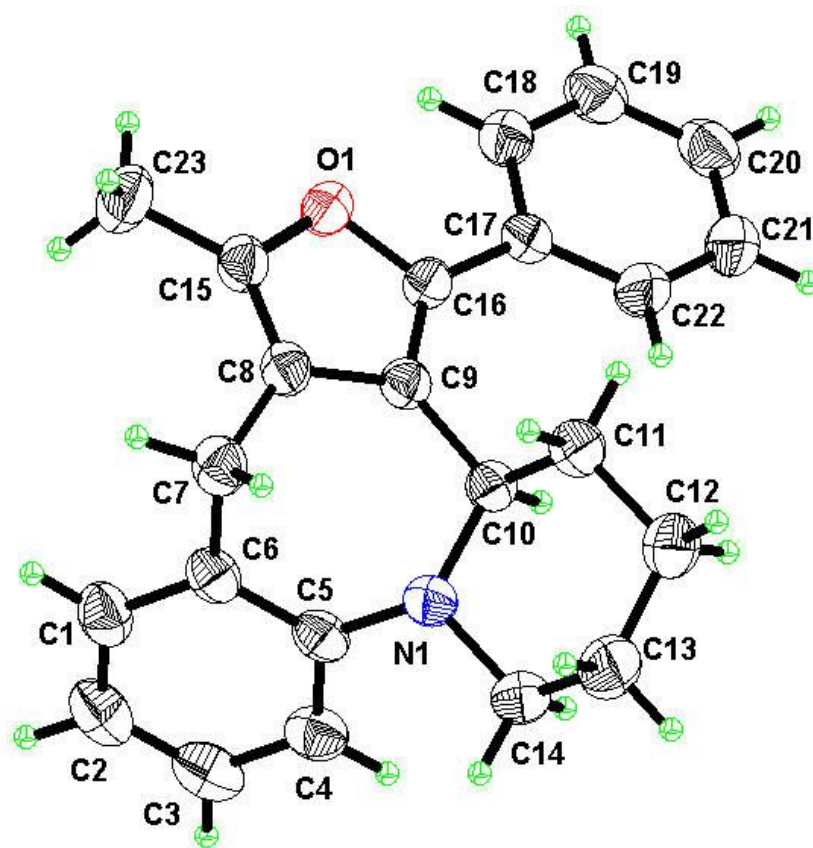

Figure 2. X-ray crystal structure of compound 3g

### General procedure for the synthesis of yne-enones:

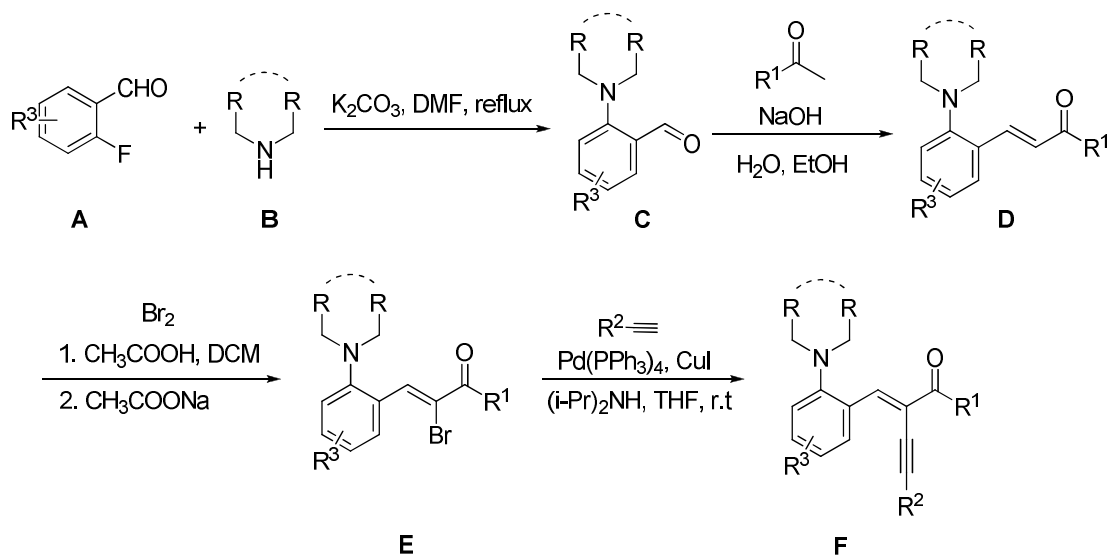

#### 1. (*E*)-3-(2-morpholinobenzylidene)-5-phenylpent-4-yn-2-one

(*Z*)-3-bromo-4-(2-morpholinophenyl)but-3-en-2-one (5 mmol, 1.55 g), which was started from 2-fluorobenzaldehyde, ethynylbenzene (7.5 mmol, 0.765 g), Pd(PPh<sub>3</sub>)<sub>4</sub> (1 mol%, 57.8 mg), and CuI (2 mol%, 19.1 mg) were taken up in THF at room temperature. Diisopropyl amine (15 mmol, 1.52 g) was added, and the resulting reaction mixture was stirred at room temperature till the complete consumption of the bromide as determined by TLC analysis. Water was added and the mixture was extracted three times with Et<sub>2</sub>O, the combined organic layers were washed with brine and dried (MgSO<sub>4</sub>). After filtration and concentration, the residue was purified by flash column chromatography on silica gel (hexanes/ethyl acetate = 10 : 1) to give the desired product **1a** (1.59 g) as a yellow solid in 96% yield. m.p: 92-94 °C; <sup>1</sup>H NMR (300 MHz, CDCl<sub>3</sub>): 8.44 (d, *J* = 7.8 Hz, 1 H), 8.23 (s, 1 H), 7.55-7.47 (m, 2 H), 7.45-7.30 (m, 4 H), 7.14 (t, *J* = 7.5 Hz, 1 H), 7.08 (d, *J* = 7.8 Hz, 1 H), 3.90 (t, *J* = 4.5 Hz, 4 H), 2.99 (t, *J* = 4.5 Hz, 4 H), 2.62 (s, 3 H); <sup>13</sup>C NMR (75 MHz, CDCl<sub>3</sub>): 196.23, 153.42, 140.46, 131.37, 129.78, 128.69, 128.46, 128.09, 122.93, 122.42, 119.57, 118.24, 98.15, 86.62, 67.15, 53.42, 28.12 ppm. MS (70 eV): *m/z* (%): 331 (M<sup>+</sup>, 47.61), 230 (100). Anal, calcd for C<sub>22</sub>H<sub>21</sub>NO<sub>2</sub>: C, 79.73, H, 6.39, N, 4.23, found: C, 79.93, H, 6.42, N, 4.19.

## 2. (*E*)-3-(2-morpholinobenzylidene)-5-p-tolylpent-4-yn-2-one

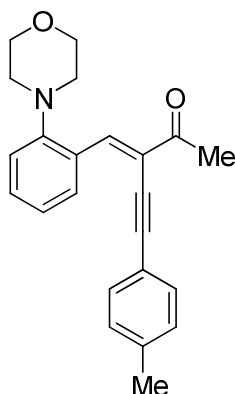

The reaction of (*Z*)-3-bromo-4-(2-morpholinophenyl)but-3-en-2-one (5 mmol, 1.55 g), 1-ethynyl-4-methylbenzene (7.5 mmol, 0.87 g), Pd(PPh<sub>3</sub>)<sub>4</sub> (1 mol%, 57.8 mg), CuI (2 mol%, 19.1 mg) and diisopropyl amine (15 mmol, 1.515 g) in THF afforded **1b** (1.66 g) as a yellow solid in 96% yield by flash column chromatography on silica gel (hexanes/ethyl acetate = 10 : 1); m.p: 127-128 °C; <sup>1</sup>H NMR (300 MHz, CDCl<sub>3</sub>): 8.45 (d, *J* = 7.8 Hz, 1 H), 8.21 (s, 1 H), 7.45-7.35 (m, 3 H), 7.20-7.00 (m, 4 H), 3.90 (t, *J* = 4.5 Hz, 4 H), 2.99 (t, *J* = 4.5 Hz, 4 H), 2.62 (s, 3 H), 2.38 (s, 3 H); <sup>13</sup>C NMR (75 MHz, CDCl<sub>3</sub>): 196.39, 153.33, 139.89, 138.95, 131.27, 131.24, 129.72, 129.21, 128.08, 122.37, 119.81, 119.63, 118.16, 98.39, 86.01, 67.12, 53.37, 28.16, 21.52 ppm; MS (70 eV): *m/z* (%): 345 (M<sup>+</sup>, 69.82), 244 (100). HRMS calcd for C<sub>23</sub>H<sub>23</sub>NO<sub>2</sub>: 345.1729, found: 345.1729.

## 3. (*E*)-5-(4-methoxyphenyl)-3-(2-morpholinobenzylidene)pent-4-yn-2-one

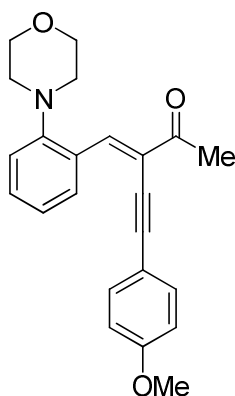

The reaction of (*Z*)-3-bromo-4-(2-morpholinophenyl)but-3-en-2-one (5 mmol,

1.55 g), 1-ethynyl-4-methoxybenzene (7.5 mmol, 0.99 g), Pd(PPh<sub>3</sub>)<sub>4</sub> (1 mol%, 57.8 mg), Cul (2 mol%, 19.1 mg) and diisopropyl amine (15 mmol, 1.515 g) in THF afforded **1c** (1.66 g) as a yellow solid in 92% yield by flash column chromatography on silica gel (hexanes/ethyl acetate = 8 : 1); m.p: 82-83 °C; <sup>1</sup>H NMR (300 MHz, CDCl<sub>3</sub>): 8.45 (d, *J* = 7.8 Hz, 1 H), 8.17 (s, 1 H), 7.50-7.35 (m, 3 H), 7.13 (t, *J* = 7.5 Hz, 1 H), 7.06 (d, *J* = 7.8 Hz, 1 H), 6.89 (d, *J* = 9.0 Hz, 2 H), 3.90 (t, *J* = 4.5 Hz, 4 H), 3.83 (s, 3 H), 2.98 (t, *J* = 4.5 Hz, 4 H), 2.61 (s, 3 H); <sup>13</sup>C NMR (75 MHz, CDCl<sub>3</sub>): 196.48, 159.95, 153.28, 139.45, 132.87, 131.19, 129.68, 128.17, 122.35, 119.80, 118.16, 115.00, 114.12, 98.30, 85.43, 67.14, 55.30, 53.36, 28.13 ppm; MS (70 eV): *m/z* (%): 361 (M<sup>+</sup>, 35.80), 91 (100). Anal, calcd for C<sub>23</sub>H<sub>23</sub>NO<sub>3</sub>: C, 76.43; H, 6.41; N, 3.88; found: C, 76.47, H, 6.62, N, 3.90.

#### 4. (*E*)-3-(2-morpholinobenzylidene)-5-(4-nitrophenyl)pent-4-yn-2-one

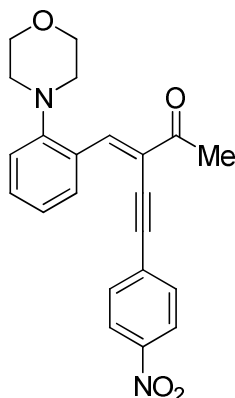

The reaction of (*Z*)-3-bromo-4-(2-morpholinophenyl)but-3-en-2-one (5 mmol, 1.55 g), 1-ethynyl-4-nitrobenzene (7.5 mmol, 1.1025 g), Pd(PPh<sub>3</sub>)<sub>4</sub> (1 mol%, 57.8 mg), Cul (2 mol%, 19.1 mg) and diisopropyl amine (15 mmol, 1.515 g) in THF afforded **1d** (0.90 g) as an orange solid in 48% yield by flash column chromatography on silica gel (hexanes/ethyl acetate = 5 : 1); m.p: 158-159 °C; <sup>1</sup>H NMR (300 MHz, CDCl<sub>3</sub>): 8.40-8.25 (m, 2 H), 8.23 (d, *J* = 8.1 Hz, 2 H), 7.62 (d, *J* = 8.1 Hz, 2 H), 7.45 (t, *J* = 7.8 Hz, 1 H), 7.19-7.06 (m, 2 H), 3.90 (t, *J* = 4.2 Hz, 4 H), 3.00 (t, *J* = 4.2 Hz, 4 H), 2.62 (s, 3 H); <sup>13</sup>C NMR (75 MHz, CDCl<sub>3</sub>): 195.42, 153.66, 147.15, 143.13, 132.06, 129.74, 129.66, 127.66, 123.76,

122.45, 118.88, 118.48, 95.81, 91.59, 67.13, 53.48, 28.03 ppm. MS (70 eV):  
m/z (%): 376 ( $M^+$ , 68.11), 43 (100). HRMS calcd for  $C_{22}H_{20}N_2O_4$ : 376.1423,  
found: 376.1423.

### 5. (*E*)-5-cyclohexenyl-3-(2-morpholinobenzylidene)pent-4-yn-2-one

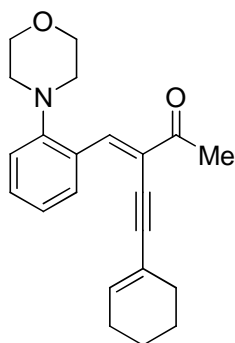

The reaction of (*Z*)-3-bromo-4-(2-morpholinophenyl)but-3-en-2-one (5 mmol, 1.55 g), 1-ethynylcyclohex-1-ene (7.5 mmol, 0.80 g),  $Pd(PPh_3)_4$  (1 mol%, 57.8 mg),  $CuI$  (2 mol%, 19.1 mg) and diisopropyl amine (15 mmol, 1.515 g) in THF afforded **1e** (1.36 g) as a yellow solid in 81% yield by flash column chromatography on silica gel (hexanes/ethyl acetate = 20 : 1); m.p: 113-114 °C;  $^1H$  NMR (300 MHz,  $CDCl_3$ ): 8.36 (d,  $J = 7.8$  Hz, 1 H), 8.09 (s, 1 H), 7.35 (t,  $J = 7.5$  Hz, 1 H), 7.12-6.95 (m, 2 H), 6.19 (brs, 1 H), 3.86 (t,  $J = 4.5$  Hz, 4 H), 2.93 (t,  $J = 4.5$  Hz, 4 H), 2.52 (s, 3 H), 2.25-2.05 (m, 4 H), 1.70-1.50 (m, 4 H);  $^{13}C$  NMR (75 MHz,  $CDCl_3$ ): 196.48, 153.10, 138.78, 135.93, 130.97, 129.49, 128.06, 122.17, 120.65, 119.74, 118.00, 100.24, 84.06, 67.01, 53.24, 28.54, 27.93, 25.68, 22.07, 21.31 ppm. MS (70 eV): m/z (%): 335 ( $M^+$ , 45.95), 292 (100). HRMS calcd for  $C_{22}H_{25}NO_2$ : 335.1885, found: 335.1886.

### 6. (*E*)-3-(2-morpholinobenzylidene)non-4-yn-2-one

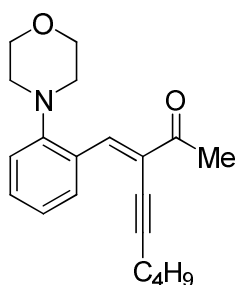



The reaction of (*Z*)-3-bromo-4-(2-morpholinophenyl)but-3-en-2-one (5 mmol, 1.55 g), hex-1-yne (7.5 mmol, 0.62 g), Pd(PPh<sub>3</sub>)<sub>4</sub> (1 mol%, 57.8 mg), Cul (2 mol%, 19.1 mg) and diisopropyl amine (15 mmol, 1.52 g) in THF afforded **1f** (1.51 g) as an yellow oil in 97% yield by flash column chromatography on silica gel (hexanes/ethyl acetate = 20 : 1); <sup>1</sup>H NMR (300 MHz, CDCl<sub>3</sub>): 8.37 (dd, *J* = 7.8, 1.2 Hz, 1 H), 8.09 (s, 1 H), 7.37 (td, *J* = 7.5, 1.2 Hz, 1 H), 7.12-6.95 (m, 2 H), 3.88 (t, *J* = 4.5 Hz, 4 H), 2.95 (t, *J* = 4.5 Hz, 4 H), 2.55-2.40 (m, 5 H), 1.70-1.55 (m, 2 H), 1.55-1.40 (m, 2 H), 0.95 (t, *J* = 7.2 Hz, 3 H); <sup>13</sup>C NMR (75 MHz, CDCl<sub>3</sub>): 197.08, 152.95, 139.18, 130.93, 129.46, 128.06, 122.18, 120.28, 117.99, 99.95, 77.29, 67.08, 53.22, 30.39, 27.93, 22.01, 19.48, 13.54 ppm. MS (70 eV): *m/z* (%): 311 (M<sup>+</sup>, 79.82), 268 (100). HRMS calcd for C<sub>20</sub>H<sub>25</sub>NO<sub>2</sub>: 311.1884, found: 311.1885.

#### 7. (*E*)-5-phenyl-3-(2-(piperidin-1-yl)benzylidene)pent-4-yn-2-one

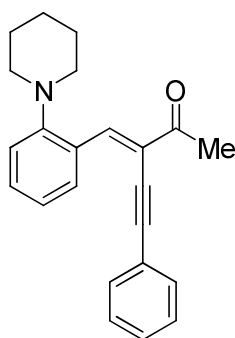

The reaction of (*Z*)-3-bromo-4-(2-(piperidin-1-yl)phenyl)but-3-en-2-one (5 mmol, 1.535 g), ethynylbenzene (7.5 mmol, 0.77 g), Pd(PPh<sub>3</sub>)<sub>4</sub> (1 mol%, 57.8 mg), Cul (2 mol%, 19.1 mg) and diisopropyl amine (15 mmol, 1.52 g) in THF afforded **1g** (1.58 g) as an yellow solid in 96% yield by flash column chromatography on silica gel (hexanes/ethyl acetate = 30 : 1); m.p.: 109-110 °C; <sup>1</sup>H NMR (300 MHz, CDCl<sub>3</sub>): 8.44 (d, *J* = 7.5 Hz, 1 H), 8.21 (s, 1 H), 7.60-7.45 (m, 2 H), 7.43-7.30 (m, 4 H), 7.15-7.10 (m, 2 H), 3.00-2.85 (m, 4 H), 2.63 (s, 3 H), 1.85-1.70 (m, 4 H), 1.65-1.52 (m, 2 H); <sup>13</sup>C NMR (75 MHz, CDCl<sub>3</sub>): 196.50, 155.02, 141.45, 131.38, 131.27, 129.60, 128.54, 128.42, 127.98, 123.11, 121.48, 119.09, 118.39, 97.87, 86.76, 54.65, 28.04, 26.42,

24.21 ppm. MS (70 eV):  $m/z$  (%): 329 ( $M^+$ , 63.14), 286 (100). Anal, calcd for  $C_{23}H_{23}NO$ : C, 83.85, H, 7.04, N, 4.25, found: C, 83.90, H, 6.98, N, 4.21.

### 8. (*E*)-3-(2-(piperidin-1-yl)benzylidene)-5-p-tolylpent-4-yn-2-one

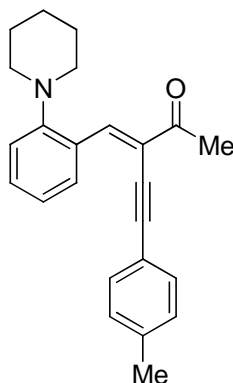

The reaction of (*Z*)-3-bromo-4-(2-(piperidin-1-yl)phenyl)but-3-en-2-one (5 mmol, 1.54 g), 1-ethynyl-4-methylbenzene (7.5 mmol, 0.87 g),  $Pd(PPh_3)_4$  (1 mol%, 57.8 mg),  $CuI$  (2 mol%, 19.1 mg) and diisopropyl amine (15 mmol, 1.52 g) in THF afforded **1h** (1.44 g) as an yellow solid in 84% yield by flash column chromatography on silica gel (hexanes/ethyl acetate = 40 : 1); m.p.: 126-128 °C;  $^1H$  NMR (300 MHz,  $CDCl_3$ ): 8.45 (d,  $J = 7.8$  Hz, 1 H), 8.19 (s, 1 H), 7.45-7.30 (m, 3 H), 7.17 (d,  $J = 8.1$  Hz, 2 H), 7.10-7.00 (m, 2 H), 3.05-2.85 (m, 4 H), 2.62 (s, 3 H), 2.38 (s, 3 H), 1.80-1.70 (m, 4 H), 1.65-1.50 (m, 2 H);  $^{13}C$  NMR (75 MHz,  $CDCl_3$ ): 196.60, 155.00, 140.95, 138.78, 131.29, 131.16, 129.60, 129.19, 128.11, 121.49, 120.10, 119.29, 118.39, 98.18, 86.21, 54.65, 28.01, 26.44, 24.24, 21.52 ppm. MS (70 eV):  $m/z$  (%): 343 ( $M^+$ , 41.18), 149 (100). Anal, calcd for  $C_{24}H_{25}NO$ : C, 83.93, H, 7.34, N, 4.08, found: C, 83.79, H, 7.35, N, 4.06.

### 9. (*E*)-5-(4-methoxyphenyl)-3-(2-(piperidin-1-yl)benzylidene)pent-4-yn-2-one

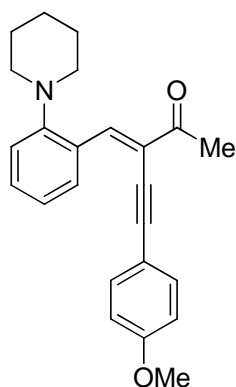

The reaction of (*Z*)-3-bromo-4-(2-(piperidin-1-yl)phenyl)but-3-en-2-one (5 mmol, 1.54 g), 1-ethynyl-4-methoxybenzene (7.5 mmol, 0.99 g), Pd(PPh<sub>3</sub>)<sub>4</sub> (1 mol%, 57.8 mg), CuI (2 mol%, 19.1 mg) and diisopropyl amine (15 mmol, 1.52 g) in THF afforded **1i** (1.60 g) as an yellow solid in 89% yield by flash column chromatography on silica gel (hexanes/ethyl acetate = 50 : 1); m.p.: 98-99 °C; <sup>1</sup>H NMR (300 MHz, CDCl<sub>3</sub>): 8.45 (d, *J* = 7.5 Hz, 1 H), 8.17 (s, 1 H), 7.55-7.40 (m, 2 H), 7.39-7.30 (m, 1 H), 7.10-7.00 (m, 2 H), 6.95-6.80 (m, 2 H), 3.83 (s, 3 H), 3.00-2.87 (m, 4 H), 2.62 (s, 3 H), 1.87-1.72 (m, 4 H), 1.65-1.55 (m, 2 H); <sup>13</sup>C NMR (75 MHz, CDCl<sub>3</sub>): 196.65, 159.89, 154.94, 140.51, 132.88, 131.08, 129.55, 128.19, 121.47, 119.46, 118.38, 115.30, 114.12, 98.06, 85.61, 55.31, 54.63, 27.98, 26.44, 24.24 ppm. MS (70 eV): *m/z* (%): 359 (M<sup>+</sup>, 93.29), 316 (100). HRMS calcd for C<sub>24</sub>H<sub>25</sub>NO<sub>2</sub>: 359.1885, found: 359.1884.

#### 10. (*E*)-5-cyclopropyl-3-(2-(piperidin-1-yl)benzylidene)pent-4-yn-2-one

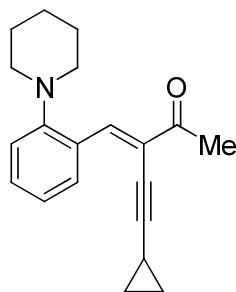

The reaction of (*Z*)-3-bromo-4-(2-(piperidin-1-yl)phenyl)but-3-en-2-one (5 mmol, 1.54 g), ethynylcyclopropane (7.5 mmol, 0.495 g), Pd(PPh<sub>3</sub>)<sub>4</sub> (1 mol%, 57.8 mg), CuI (2 mol%, 19.1 mg) and diisopropyl amine (15 mmol, 1.52 g) in THF afforded **1j** (1.14 g) as an yellow solid in 78% yield by flash column

chromatography on silica gel (hexanes/ethyl acetate = 50 : 1); m.p.: 68-69 °C; <sup>1</sup>H NMR (300 MHz, CDCl<sub>3</sub>): 8.32 (d, *J* = 7.2 Hz, 1 H), 8.07 (s, 1 H), 7.36-7.28 (m, 1 H), 7.05-6.95 (m, 2 H), 2.95-2.85 (m, 4 H), 2.50 (s, 3 H), 1.80-1.70 (m, 4 H), 1.60-1.45 (m, 3 H), 0.95-0.75 (m, 4 H); <sup>13</sup>C NMR (75 MHz, CDCl<sub>3</sub>): 197.10, 154.63, 140.23, 130.85, 129.14, 128.18, 121.31, 119.91, 118.27, 102.63, 72.71, 54.52, 27.71, 26.42, 24.21, 8.68, 0.71 ppm. MS (70 eV): *m/z* (%): 293 (M<sup>+</sup>, 42.70), 250 (100). HRMS calcd for C<sub>20</sub>H<sub>23</sub>NO: 293.1780, found: 293.1779.

### 11. (*E*)-3-(2-(azocan-1-yl)benzylidene)-5-phenylpent-4-yn-2-one

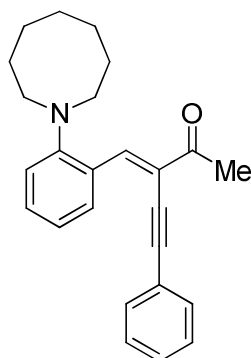

The reaction of (*Z*)-4-(2-(azocan-1-yl)phenyl)-3-bromobut-3-en-2-one (5 mmol, 1.68 g), ethynylbenzene (7.5 mmol, 0.77 g), Pd(PPh<sub>3</sub>)<sub>4</sub> (1 mol%, 57.8 mg), Cul (2 mol%, 19.1 mg) and diisopropyl amine (15 mmol, 1.52 g) in THF afforded **1k** (1.39 g) as a red oil in 78% yield by flash column chromatography on silica gel (hexanes/ethyl acetate = 70 : 1); <sup>1</sup>H NMR (300 MHz, CDCl<sub>3</sub>): 8.39 (d, *J* = 7.8 Hz, 1 H), 8.31 (s, 1 H), 7.55-7.48 (m, 2 H), 7.40-7.30 (m, 4 H), 7.19 (d, *J* = 7.5 Hz, 1 H), 7.03 (t, *J* = 7.5 Hz, 1 H), 3.30-3.22 (m, 4 H), 2.64 (s, 3 H), 1.77 (bs, 10 H); <sup>13</sup>C NMR (75 MHz, CDCl<sub>3</sub>): 196.26, 155.74, 142.97, 131.28, 131.08, 129.88, 128.46, 128.37, 128.06, 123.11, 120.72, 120.09, 118.35, 97.58, 87.00, 55.54, 28.21, 28.12, 27.45, 25.08 ppm; MS (70 eV): *m/z* (%): 357 (100). HRMS calcd for C<sub>25</sub>H<sub>27</sub>NO: 357.2093, found: 357.2092.

### 12. (*E*)-3-(2-(dibenzylamino)benzylidene)-5-phenylpent-4-yn-2-one

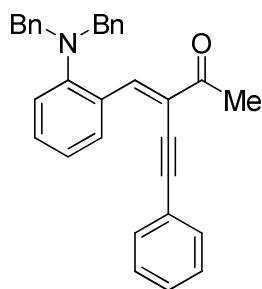

The reaction of (*Z*)-3-bromo-4-(2-(dibenzylamino)phenyl)but-3-en-2-one (5 mmol, 2.10 g), ethynylbenzene (7.5 mmol, 0.77 g), Pd(PPh<sub>3</sub>)<sub>4</sub> (1 mol%, 57.8 mg), Cul (2 mol%, 19.1 mg) and diisopropyl amine (15 mmol, 1.52 g) in THF afforded **1l** (1.94 g) as an yellow oil in 88% yield by flash column chromatography on silica gel (hexanes/ethyl acetate = 40 : 1); <sup>1</sup>H NMR (300 MHz, CDCl<sub>3</sub>): 8.50 (s, 1 H), 8.42 (d, *J* = 7.8 Hz, 1 H), 7.55-7.45 (m, 2 H), 7.40-7.34 (m, 3 H), 7.32-7.15 (m, 11 H), 7.08 (t, *J* = 7.5 Hz, 1 H), 6.98 (d, *J* = 8.1 Hz, 1 H), 4.17 (s, 3 H), 2.58 (s, 3 H); <sup>13</sup>C NMR (75 MHz, CDCl<sub>3</sub>): 196.37, 152.03, 141.39, 137.64, 131.41, 130.74, 129.88, 129.28, 128.61, 128.45, 128.31, 127.17, 123.04, 122.38, 121.73, 119.81, 97.90, 86.74, 57.82, 28.06 ppm; MS (70 eV): *m/z* (%): 441 (M<sup>+</sup>, 14.55), 91 (100). HRMS calcd for C<sub>32</sub>H<sub>27</sub>NO: 441.2093, found: 441.2094

### 13. (*E*)-3-(2-(diethylamino)benzylidene)-5-phenylpent-4-yn-2-one

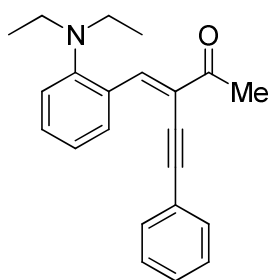

The reaction of (*Z*)-3-bromo-4-(2-(diethylamino)phenyl)but-3-en-2-one (5 mmol, 1.48 g), ethynylbenzene (7.5 mmol, 0.77 g), Pd(PPh<sub>3</sub>)<sub>4</sub> (1 mol%, 57.8 mg), Cul (2 mol%, 19.1 mg) and diisopropyl amine (15 mmol, 1.515 g) in THF afforded **1m** (0.97 g) as an yellow oil in 61% yield by flash column chromatography on silica gel (hexanes/ethyl acetate = 80 : 1); <sup>1</sup>H NMR (300 MHz, CDCl<sub>3</sub>): 8.47 (d, *J* = 7.8 Hz, 1 H), 8.24 (s, 1 H), 7.55-7.45 (m, 2 H),

7.40-7.30 (m, 4 H), 7.15-7.00 (m, 2 H), 3.10 (q,  $J = 7.2$  Hz, 4 H), 2.63 (s, 3 H), 1.07 (t,  $J = 7.2$  Hz, 6 H);  $^{13}\text{C}$  NMR (75 MHz,  $\text{CDCl}_3$ ): 196.58, 152.60, 141.89, 131.34, 130.62, 129.78, 129.76, 128.52, 128.42, 123.13, 121.57, 120.82, 118.90, 97.75, 86.96, 47.94, 28.12, 12.45 ppm; MS (70 eV):  $m/z$  (%): 317 ( $\text{M}^+$ , 20.24), 288 (100). HRMS calcd for  $\text{C}_{22}\text{H}_{23}\text{NO}$ : 317.1780, found: 317.1779.

#### 14. (*E*)-3-(4-bromo-2-morpholinobenzylidene)-5-phenylpent-4-yn-2-one

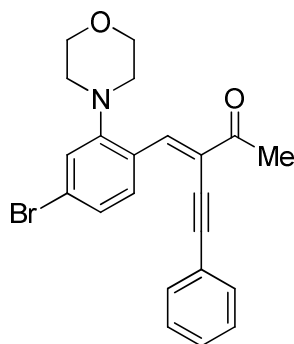

The reaction of (*Z*)-3-bromo-4-(4-bromo-2-morpholinophenyl)but-3-en-2-one (5 mmol, 1.95 g), ethynylbenzene (7.5 mmol, 0.765 g),  $\text{Pd}(\text{PPh}_3)_4$  (1 mol%, 57.8 mg),  $\text{CuI}$  (2 mol%, 19.1 mg) and diisopropyl amine (15 mmol, 1.52 g) in THF afforded **1n** (1.62 g) as a yellow solid in 79% yield by flash column chromatography on silica gel (hexanes/ethyl acetate = 10 : 1); m.p: 144-145 °C;  $^1\text{H}$  NMR (300 MHz,  $\text{CDCl}_3$ ): 8.28 (d,  $J = 8.4$  Hz, 1 H), 8.08 (s, 1 H), 7.55-7.46 (m, 2 H), 7.40-7.30 (m, 3 H), 7.28-7.20 (m, 1 H), 7.19-7.11 (m, 1 H), 3.89 (t,  $J = 4.5$  Hz, 4 H), 2.98 (t,  $J = 4.5$  Hz, 4 H), 2.61 (s, 3 H);  $^{13}\text{C}$  NMR (75 MHz,  $\text{CDCl}_3$ ): 195.90, 154.33, 139.10, 131.33, 130.81, 128.88, 128.52, 126.81, 125.46, 125.40, 122.63, 121.80, 119.79, 98.73, 86.35, 66.93, 53.19, 28.14. MS (70 eV):  $m/z$  (%): 409 ( $\text{M}^+$ , 18.26), 411 ( $\text{M}^+ + 2$ , 18.18), 43 (100). Anal, calcd for  $\text{C}_{22}\text{H}_{20}\text{BrNO}_2$ : C, 64.40, H, 4.91, N, 3.41, found: C, 64.29, H, 4.91, N, 3.41.

#### 15. (*E*)-2-(5-bromo-2-(piperidin-1-yl)benzylidene)-1-phenyl-4-p-tolylbut-3-yn-1-one

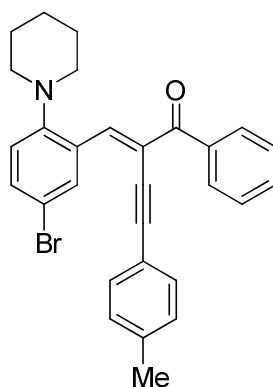

The reaction of (Z)-2-bromo-3-(5-bromo-2-(piperidin-1-yl)phenyl)-1-phenylprop-2-en-1-one (5 mmol, 2.25 g), 1-ethynyl-4-methylbenzene (7.5 mmol, 0.87 g), Pd(PPh<sub>3</sub>)<sub>4</sub> (1 mol%, 57.8 mg), Cul (2 mol%, 19.1 mg) and diisopropyl amine (15 mmol, 1.52 g) in THF afforded **1o** (2.06 g) as a yellow solid in 85% yield by flash column chromatography on silica gel (hexanes/ethyl acetate = 30 : 1); m.p: 122-123 °C; <sup>1</sup>H NMR (300 MHz, CDCl<sub>3</sub>): 8.83 (d, *J* = 2.4 Hz, 1 H), 7.99 (d, *J* = 8.7 Hz, 2 H), 7.87 (s, 1 H), 7.60-7.52 (m, 1 H), 7.52-7.40 (m, 3 H), 7.36 (d, *J* = 8.4 Hz, 2 H), 7.14 (d, *J* = 8.1 Hz, 2 H), 6.92 (d, *J* = 8.7 Hz, 1 H), 2.95-2.80 (m, 4 H), 2.36 (s, 3 H), 1.70-1.60 (m, 4 H), 1.59-1.49 (m, 2 H); <sup>13</sup>C NMR (75 MHz, CDCl<sub>3</sub>): δ = 193.53, 153.46, 140.95, 139.05, 137.37, 133.47, 132.29, 132.00, 131.45, 130.21, 129.57, 129.18, 128.03, 120.76, 120.34, 119.68, 114.54, 101.14, 86.04, 54.44, 26.16, 23.98, 21.56 ppm. MS (70 eV): *m/z* (%): 483 (M<sup>+</sup>, 22.11), 105 (100). HRMS calcd for C<sub>29</sub>H<sub>26</sub>BrNO: 483.1198, found: 483.1200.

**16. 1-((4a*S*,5*R*)-5-(phenylethynyl)-1,2,4,4a,5,6-hexahydro-[1,4]oxazino[4,3-*a*]quinolin-5-yl)ethanone**

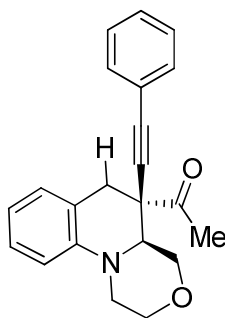

Synthesis of **2a**: A solution of **1a** (0.3 mmol, 99.3 mg) and Sc(OTf)<sub>3</sub> (10

mol%, 14.8 mg) in DCE (3.0 mL) was stirred under reflux for 34.5 h. The reaction was completed as determined by TLC analysis. After concentration of the reaction mixture under reduced pressure, the residue was purified by flash column chromatography on silica gel (hexanes/ethyl acetate = 40 : 1) to afford the pure product **2a** (85.3 mg, dr = 15 : 1) as a yellow oil in a yield of 86%; <sup>1</sup>H NMR (300 MHz, CDCl<sub>3</sub>): major : 7.40-7.24 (m, 5 H), 7.20-7.10 (m, 1 H), 7.04 (d, *J* = 7.2 Hz, 1 H), 6.85-6.70 (m, 2 H), 4.10-3.90 (m, 2 H), 3.80-3.70 (m, 2 H), 3.69-3.60 (m, 2 H), 3.25 (d, *J* = 15.3 Hz, 1 H), 3.20-3.10 (m, 1 H), 3.05 (d, *J* = 15.3 Hz, 1 H), 2.53 (s, 3 H); <sup>13</sup>C NMR (75 MHz, CDCl<sub>3</sub>): 205.61, 144.38, 131.61, 129.23, 128.40, 128.21, 127.66, 122.52, 120.59, 118.23, 112.26, 86.96, 86.84, 68.25, 66.38, 58.40, 49.36, 46.97, 38.05, 27.67 ppm. MS (70 eV): *m/z* (%): 331 (100). HRMS calcd for C<sub>22</sub>H<sub>21</sub>NO<sub>2</sub>: 331.1572, found: 331.1570.

**17. (1-((4a*S*,5*R*)-5-(*p*-tolylethynyl)-1,2,4,4a,5,6-hexahydro-[1,4]oxazino[4,3-*a*]quinolin-5-yl)ethanone)**

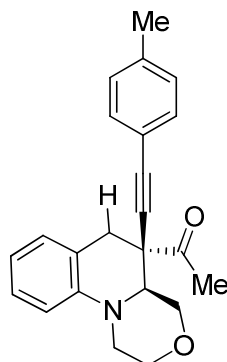

The reaction of **1b** (0.3 mmol, 103.5 mg) under the catalysis of Sc(OTf)<sub>3</sub> (10 mol%, 14.8 mg) in DCE (3.0 mL) afforded the **2b** (70.4 mg, dr = 17 : 1) by flash column chromatography on silica gel (hexanes/ethyl acetate = 40 : 1) as a light yellow oil in 68% yield; <sup>1</sup>H NMR (300 MHz, CDCl<sub>3</sub>): major : 7.30-7.00 (m, 6 H), 6.85-6.70 (m, 2 H), 4.05-3.90 (m, 2 H), 3.80-3.60 (m, 4 H), 3.23 (d, *J* = 15.3 Hz, 1 H), 3.20-3.00 (m, 2 H), 2.52 (s, 3 H), 2.34 (s, 3 H); <sup>13</sup>C NMR (75 MHz, CDCl<sub>3</sub>): 205.74, 144.35, 138.55, 131.49, 129.21, 128.94, 127.64, 120.70, 119.43, 118.21, 112.26, 87.05, 86.04, 68.26, 66.34, 58.39, 49.33, 47.01, 37.95, 27.59, 21.42 ppm. MS (70 eV): *m/z* (%): 345 (100). HRMS calcd for C<sub>23</sub>H<sub>23</sub>NO<sub>2</sub>:



345.1729, found: 345.1729.

**18. 1-((4a*S*,5*R*)-5-((4-nitrophenyl)ethynyl)-1,2,4,4a,5,6-hexahydro-[1,4]oxazino[4,3-*a*]quinolin-5-yl)ethanone**

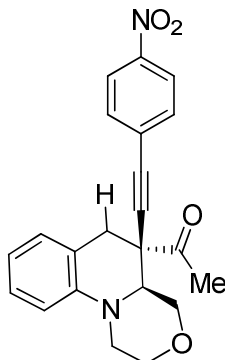

The reaction of **1d** (0.3 mmol, 112.8 mg) under the catalysis of Sc(OTf)<sub>3</sub> (10 mol%, 14.8 mg) in DCE (3.0 mL) afforded the **2d** (89.1 mg, dr = 10 : 1) by flash column chromatography on silica gel (hexanes/ethyl acetate = 10 : 1) as a light yellow solid in 79% yield; m.p.: 109-110°C, <sup>1</sup>H NMR (300 MHz, CDCl<sub>3</sub>): major: 8.13 (d, *J* = 8.7 Hz, 2 H), 7.45 (d, *J* = 8.7 Hz, 2 H), 7.17 (t, *J* = 7.8 Hz, 1 H), 7.03 (d, *J* = 7.2 Hz, 1 H), 6.85-6.70 (m, 2 H), 3.99 (d, *J* = 8.1 Hz, 2 H), 3.85-3.55 (m, 4 H), 3.27(d, *J* = 15.6 Hz, 1 H), 3.15-3.00 (m, 2 H), 2.53 (s, 3 H); <sup>13</sup>C NMR (75 MHz, CDCl<sub>3</sub>): 204.77, 147.10, 144.31, 132.45, 129.33, 129.27, 127.84, 123.47, 120.05, 118.48, 112.42, 92.58, 85.27, 68.12, 66.50, 58.41, 49.56, 46.88, 38.20, 28.05 ppm. MS (70 eV): *m/z* (%): 376 (100). HRMS calcd for C<sub>22</sub>H<sub>20</sub>N<sub>2</sub>O<sub>4</sub>: 376.1423, found: 376.1425.

**19. 1-((4a*R*,5*R*)-5-(phenylethynyl)-2,3,4,4a,5,6-hexahydro-1*H*-pyrido[1,2-*a*]quinolin-5-yl)ethanone**

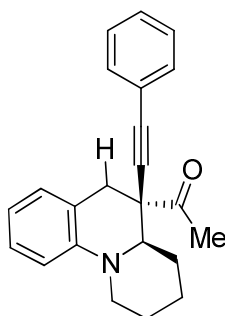

The reaction of **1g** (0.3 mmol, 98.7 mg) under the catalysis of Sc(OTf)<sub>3</sub> (10 mol%, 14.8 mg) in DCE (3.0 mL) afforded the **2g** (74.1 mg, dr = 11 : 1) by flash column chromatography on silica gel (hexanes/ethyl acetate = 40 : 1) as a light yellow solid in 75% yield; m.p: 82-83 °C; <sup>1</sup>H NMR (300 MHz, CDCl<sub>3</sub>): major: 7.40-7.35 (m, 2 H), 7.35-7.25 (m, 3 H), 7.15-7.00 (m, 2 H), 6.79 (d, *J* = 8.4 Hz, 1 H), 6.69 (t, *J* = 7.2 Hz, 1 H), 4.05 (d, *J* = 7.2 Hz, 1 H), 3.69 (d, *J* = 10.5 Hz, 1 H), 3.36 (d, *J* = 15.6 Hz, 1 H), 3.10-2.85 (m, 2 H), 2.45 (s, 3 H), 1.94 (d, *J* = 10.8 Hz, 2 H), 1.75-1.50 (m, 4 H); <sup>13</sup>C NMR (75 MHz, CDCl<sub>3</sub>): 204.37, 143.74, 131.64, 129.17, 128.29, 128.22, 127.39, 122.75, 121.06, 117.47, 113.01, 88.20, 86.09, 61.67, 51.31, 49.06, 34.40, 26.25, 25.78, 25.21, 23.07 ppm. MS (70 eV): *m/z* (%): 329 (100). HRMS calcd for C<sub>23</sub>H<sub>23</sub>NO: 329.1780, found: 329.1778.

**20. 1-((4aR,5R)-5-(p-tolylethynyl)-2,3,4,4a,5,6-hexahydro-1H-pyrido[1,2-a]quinolin-5-yl)ethanone**

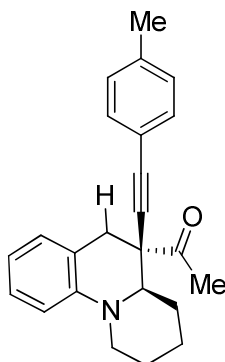

The reaction of **1h** (0.3 mmol, 102.9 mg) under the catalysis of Sc(OTf)<sub>3</sub> (10 mol%, 14.8 mg) in DCE (3.0 mL) afforded the **2h** (75.1 mg, dr = 8 : 1) by flash column chromatography on silica gel (hexanes/ethyl acetate = 40 : 1) as a light yellow oil in 73% yield; <sup>1</sup>H NMR (300 MHz, CDCl<sub>3</sub>): major: 7.26 (d, *J* = 7.2 Hz, 2 H), 7.15-7.00 (m, 4 H), 6.77 (d, *J* = 8.4 Hz, 1 H), 6.68 (t, *J* = 8.2 Hz, 1 H), 4.04 (d, *J* = 13.8 Hz, 1 H), 3.68 (d, *J* = 10.5 Hz, 1 H), 3.34 (d, *J* = 15.9 Hz, 1 H), 3.00 (d, *J* = 15.9 Hz, 1 H), 2.95-2.80 (m, 1 H), 2.43 (s, 3 H), 2.33 (s, 3 H), 1.93 (d, *J* = 11.7 Hz, 2 H), 1.70-1.50 (m, 4 H); <sup>13</sup>C NMR (75 MHz, CDCl<sub>3</sub>): 204.42, 143.63, 138.44, 131.52, 129.18, 128.98, 127.35, 121.14, 119.64,

117.46, 113.00, 87.41, 86.12, 61.71, 51.19, 49.09, 34.14, 26.09, 25.62, 25.28, 22.93, 21.45 ppm. MS (70 eV): m/z (%): 343 ( $M^+$ , 1.83), 91 (100). HRMS calcd for  $C_{24}H_{25}NO$ : 343.1936, found: 343.1937.

**21. 1-(6-(phenylethynyl)-6,6a,7,8,9,10,11,12-octahydro-5H-azocino[1,2-a]quinolin-6-yl)ethanone**

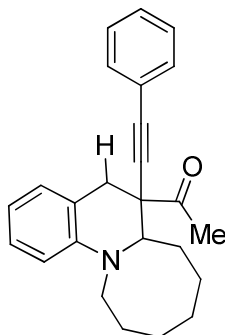

The reaction of **1k** (0.3 mmol, 107.1 mg) under the catalysis of  $Sc(OTf)_3$  (10 mol%, 14.8 mg) in DCE (3.0 mL) afforded the **2k** (85.7 mg, dr = 2 : 1) by flash column chromatography on silica gel (hexanes/ethyl acetate = 10 : 1) as a light yellow oil in 80% yield; major : minor = 2:1,  $^1H$  NMR (300 MHz,  $CDCl_3$ ): [7.50-7.40 (m, 1.34 H), 7.27-7.20 (m, 1.66 H)], 7.37-7.30 (m, 2 H), 7.18-7.00 (m, 3 H), 6.80-6.50 (m, 2 H), 4.10-3.75 (m, 2 H), [3.55-3.32 (m, 1.33 H), 3.30-3.10 (m, 1.34 H), 2.85 (d,  $J = 16.8$  Hz, 0.33 H)], 2.51 (s, 1 H), 2.29 (s, 2 H), 2.15-1.30 (m, 10 H);  $^{13}C$  NMR (75 MHz,  $CDCl_3$ ): 204.72, 202.88, 143.04, 142.59, 131.64, 131.57, 129.90, 128.83, 128.38, 128.28, 128.11, 128.08, 127.42, 127.17, 122.87, 122.64, 118.52, 118.23, 116.03, 115.90, 112.28, 111.55, 89.43, 88.87, 85.93, 84.23, 63.98, 62.92, 56.25, 53.96, 50.22, 49.37, 32.33, 30.81, 30.15, 30.12, 28.16, 27.96, 27.91, 27.57, 27.53, 27.23, 26.94, 26.70, 25.97, 24.89 ppm. MS (70 eV): m/z (%): 357 (100). HRMS calcd for  $C_{25}H_{27}NO$ : 357.2093, found: 357.2093.

**22. (1-ethyl-2-methyl-3-(phenylethynyl)-1,2,3,4-tetrahydroquinolin-3-yl)ethanone**

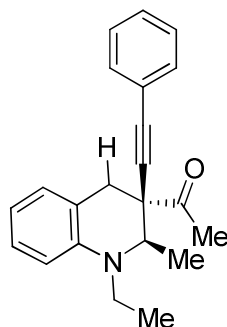

The reaction of **1m** (0.3 mmol, 95.1 mg) under the catalysis of  $\text{Sc}(\text{OTf})_3$  (10 mol%, 14.8 mg) in DCE (3.0 mL) afforded the **2m** (62.8 mg, dr = 1 : 1) by flash column chromatography on silica gel (hexanes/ethyl acetate = 30 : 1) in 66% yield.

**The first fraction:** Yellow solid in a yield of 35%; m.p: 110-111 °C;  $^1\text{H}$  NMR (300 MHz,  $\text{CDCl}_3$ ): 7.45-7.35 (m, 2 H), 7.35-7.27 (m, 3 H), 7.15-7.00 (m, 2 H), 6.66 (t,  $J = 7.2$  Hz, 1 H), 6.56 (d,  $J = 8.4$  Hz, 1 H), 4.05 (q,  $J = 6.3$  Hz, 1 H), 3.50-3.20 (m, 3 H), 3.15 (d,  $J = 6.3$  Hz, 1 H), 2.35 (s, 3 H), 1.35 (d,  $J = 6.3$  Hz, 3 H), 1.24 (t,  $J = 7.2$  Hz, 3 H);  $^{13}\text{C}$  NMR (75 MHz,  $\text{CDCl}_3$ ): 202.29, 142.00, 131.61, 128.84, 128.41, 128.29, 127.32, 122.58, 118.79, 116.28, 111.14, 88.57, 85.76, 57.57, 50.69, 44.77, 31.72, 24.36, 15.24, 13.09 ppm. MS (70 eV):  $m/z$  (%): 317 (100). HRMS calcd for  $\text{C}_{22}\text{H}_{23}\text{NO}$ : 317.1780, found: 317.1782.

**The second fraction:** Yellow oil in a yield of 31%;  $^1\text{H}$  NMR (300 MHz,  $\text{CDCl}_3$ ): 7.26-7.18 (m, 5 H), 7.15-7.05 (m, 2 H), 6.63 (t,  $J = 7.2$  Hz, 1 H), 3.90-3.80 (m, 1 H), 3.72-3.60 (m, 1 H), 3.45-3.20 (m, 2 H), 2.87 (d,  $J = 16.5$  Hz, 1 H), 2.50 (s, 3 H), 1.30 (t,  $J = 7.2$  Hz, 3 H), 0.95 (d,  $J = 6.6$  Hz, 3 H);  $^{13}\text{C}$  NMR (75 MHz,  $\text{CDCl}_3$ ): 204.55, 141.79, 131.53, 129.99, 128.10, 128.08, 127.27, 122.87, 117.97, 115.50, 110.71, 89.75, 84.48, 58.73, 49.81, 45.36, 30.26, 25.99, 15.81, 13.10 ppm.

**23. 1-((4a*S*,5*R*)-9-bromo-5-(phenylethynyl)-1,2,4,4a,5,6-hexahydro-[1,4]ox-azino[4,3-*a*]quinolin-5-yl)ethanone**

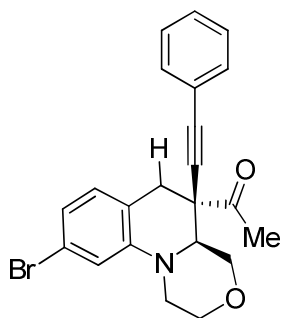

The reaction of **1o** (0.3 mmol, 122.7 mg) under the catalysis of  $\text{Sc}(\text{OTf})_3$  (10 mol%, 14.8 mg) in DCE (3.0 mL) afforded the **2o** (88.4 mg, dr = 12 : 1) by flash column chromatography on silica gel (hexanes/ethyl acetate = 10 : 1) as a light yellow solid in 72% yield. m.p: 121-123 °C;  $^1\text{H}$  NMR (300 MHz,  $\text{CDCl}_3$ ): 7.40-7.24 (m, 5 H), 6.90-6.78 (m, 3 H), 4.05-3.90 (m, 2 H), 3.75-3.55 (m, 4 H), 3.20-3.05 (m, 2 H), 2.96 (d,  $J$  = 15.3 Hz, 1 H), 2.51 (s, 3 H);  $^{13}\text{C}$  NMR (75 MHz,  $\text{CDCl}_3$ ): 205.42, 145.51, 131.61, 130.42, 128.55, 128.26, 122.27, 121.37, 120.87, 119.38, 115.17, 87.25, 86.28, 68.17, 66.22, 58.11, 49.02, 46.77, 37.64, 27.74 ppm. MS (70 eV):  $m/z$  (%): 409 ( $\text{M}^+$ , 78.46), 43 (100). HRMS calcd for  $\text{C}_{22}\text{H}_{20}\text{BrNO}_2$ : 409.0677, found: 409.0677.

#### 24. 11-methyl-13-phenyl-3,4,10,13b-tetrahydro-1H-benzo[f]furo[3,4-c][1,4]oxazino[4,3-a]azepine

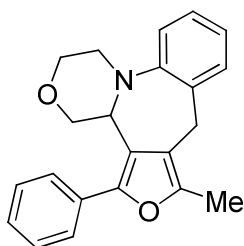

To a dry Schlenk tube,  $\text{IPrAuCl}$  (5 mol%, 9.3 mg),  $\text{AgOTf}$  (5 mol%, 3.9 mg) and anhydrous  $\text{CH}_3\text{CN}$  (1.0 mL) were added and the mixture was stirred at room temperature for 10 min in dark. After which, the substrate **1a** (0.3 mmol, 99.3 mg) and anhydrous  $\text{CH}_3\text{CN}$  (2.0 mL) were added, and this reaction mixture was stirred for 3 h at room temperature and the reaction was complete as determined by TLC analysis. After concentration under reduced pressure, the residue was purified by flash column chromatography on silica gel

(hexanes/ethyl acetate = 20:1) to afford the pure product **3a** (91.4 mg) as a light yellow solid in 92% yield. m.p.: 163-165 °C; <sup>1</sup>H NMR (300 MHz, CDCl<sub>3</sub>): 7.59 (d, *J* = 7.8 Hz, 2 H), 7.37 (t, *J* = 7.5 Hz, 2 H), 7.30-7.10 (m, 4 H), 7.01 (t, *J* = 7.5 Hz, 1 H), 4.44 (dd, *J* = 9.6, 2.4 Hz, 1 H), 4.28 (d, *J* = 13.5 Hz, 1 H), 4.15 (d, *J* = 9.6 Hz, 1 H), 3.95-3.75 (m, 2 H), 3.65-3.50 (m, 2 H), 3.30 (d, *J* = 13.5 Hz, 1 H), 3.10 (d, *J* = 11.4 Hz, 1 H), 2.35 (s, 3 H); <sup>13</sup>C NMR (75 MHz, CDCl<sub>3</sub>): 149.29, 146.15, 144.44, 139.32, 131.34, 128.61, 127.38, 126.94, 126.69, 124.85, 123.46, 119.98, 119.29, 117.80, 71.44, 67.62, 60.76, 51.84, 28.81, 11.28 ppm. MS (70 eV): *m/z* (%): 331 (M<sup>+</sup>, 79.81), 273 (100). Anal, calcd for C<sub>22</sub>H<sub>21</sub>NO<sub>2</sub>: C, 79.73, H, 6.39, N, 4.23, found: C, 79.74, H, 6.47, N, 4.27.

**25. 11-methyl-13-p-tolyl-3,4,10,13b-tetrahydro-1H-benzo[f]furo[3,4-c][1,4]oxazino[4,3-a]azepine**

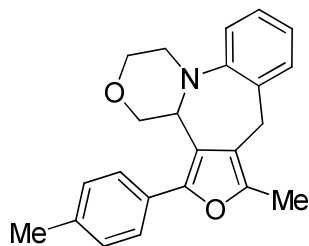

The reaction of **1b** (0.3 mmol, 103.5 mg) in anhydrous CH<sub>3</sub>CN (3.0 mL) was catalyzed by IPrAuOTf, afforded **3b** (88.0 mg) as a yellow solid in 85% yield; m.p.: 148-149 °C; <sup>1</sup>H NMR (300 MHz, CDCl<sub>3</sub>): 7.50 (d, *J* = 7.8 Hz, 2 H), 7.28 (t, *J* = 7.5 Hz, 1 H), 7.23-7.15 (m, 4 H), 7.03 (t, *J* = 7.5 Hz, 1 H), 4.44 (dd, *J* = 9.9, 2.4 Hz, 1 H), 4.28 (d, *J* = 15.5 Hz, 1 H), 4.05 (d, *J* = 10.8 Hz, 1 H), 3.90-3.75 (m, 2 H), 3.65-3.45 (m, 2 H), 3.31 (d, *J* = 13.5 Hz, 1 H), 3.11 (d, *J* = 11.4 Hz, 1 H), 2.36 (s, 6 H); <sup>13</sup>C NMR (75 MHz, CDCl<sub>3</sub>): 149.29, 146.34, 143.98, 139.30, 136.45, 129.29, 128.59, 127.32, 126.92, 124.80, 123.41, 119.94, 119.09, 116.98, 71.39, 67.58, 60.72, 51.81, 28.80, 21.11, 11.25 ppm. MS (70 eV): *m/z* (%): 345 (M<sup>+</sup>, 72.87), 287(100). HRMS calcd for C<sub>23</sub>H<sub>23</sub>NO<sub>2</sub>: 345.1729, found: 345.1730.

**26. 13-(4-methoxyphenyl)-11-methyl-3,4,10,13b-tetrahydro-1H-benzo[f]**

### furo [3,4-c][1,4]oxazino[4,3-a]azepine

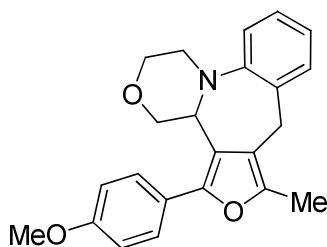

The reaction of **1c** (0.3 mmol, 108.3 mg) in anhydrous CH<sub>3</sub>CN (3.0 mL) was catalyzed by IPrAuOTf, afforded **3c** (75.8 mg) as a light yellow solid in 70% yield; m.p.: 138-139 °C; <sup>1</sup>H NMR (300 MHz, CDCl<sub>3</sub>): 7.48 (d, 2 H), 7.30-7.20 (m, 1 H), 7.20-7.10 (m, 2 H), 7.00 (td, *J* = 7.2, 0.9 Hz, 1 H), 6.95-6.85 (m, 2 H), 4.36 (dd, *J* = 9.9, 2.7 Hz, 1 H), 4.25 (d, *J* = 13.5 Hz, 1 H), 4.02 (d, *J* = 14.1 Hz, 1 H), 3.90-3.70 (m, 5 H), 3.60-3.40 (m, 2 H), 3.28 (d, *J* = 13.5 Hz, 1 H), 3.09 (d, *J* = 10.8 Hz, 1 H), 2.33 (s, 3 H); <sup>13</sup>C NMR (75 MHz, CDCl<sub>3</sub>): 158.37, 149.31, 146.24, 143.68, 139.31, 127.33, 126.96, 126.37, 124.30, 123.43, 119.94, 118.96, 116.10, 114.07, 71.44, 67.61, 60.71, 55.21, 51.85, 28.83, 11.25 ppm. MS (70 eV): m/z (%): 361 (M<sup>+</sup>, 71.09), 303 (100). HRMS calcd for C<sub>23</sub>H<sub>23</sub>NO<sub>3</sub>: 361.1678, found: 361.1680.

### 27. 11-methyl-13-(4-nitrophenyl)-3,4,10,13b-tetrahydro-1H-benzo[f]furo[3,4-c][1,4]oxazino[4,3-a]azepine

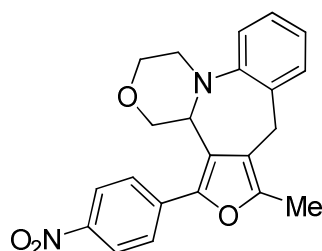

The reaction of **1d** (0.3 mmol, 112.8 mg) in anhydrous CH<sub>3</sub>CN (3.0 mL) was catalyzed by IPrAuOTf, afforded **3d** (111.7 mg) as a light yellow solid in 99% yield; m.p.: 273-274 °C; <sup>1</sup>H NMR (300 MHz, CDCl<sub>3</sub>): 8.20 (d, *J* = 9.0 Hz, 2 H), 7.70 (d, *J* = 9.0 Hz, 2 H), 7.32-7.22 (m, 1 H), 7.17 (d, *J* = 7.8 Hz, 2 H), 7.01 (t, *J* = 7.5 Hz, 1 H), 4.41 (dd, *J* = 14.7, 2.7 Hz, 1 H), 4.28 (d, *J* = 13.5 Hz, 1 H), 4.05 (d, *J* = 10.8 Hz, 1 H), 3.90-3.75 (m, 2 H), 3.55-3.45 (m, 2 H), 3.28 (d, *J* = 13.5

Hz, 1 H), 3.11 (d,  $J = 10.8$  Hz, 1 H), 2.36 (s, 3 H);  $^{13}\text{C}$  NMR (75 MHz,  $\text{CDCl}_3$ ): 148.94, 147.21, 145.41, 144.01, 139.09, 136.91, 127.64, 126.97, 124.48, 124.40, 123.77, 122.50, 120.72, 120.14, 71.19, 67.63, 60.91, 51.72, 28.63, 11.48 ppm. MS (70 eV):  $m/z$  (%): 376 ( $\text{M}^+$ , 70.37), 318 (100). HRMS calcd for  $\text{C}_{22}\text{H}_{20}\text{N}_2\text{O}_4$ : 376.1423, found: 376.1424.

**28. 13-cyclohexenyl-11-methyl-3,4,10,13b-tetrahydro-1H-benzo[f]furo[3,4-c][1,4]oxazino[4,3-a]azepine**

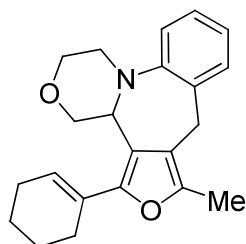

The reaction of **1e** (0.3 mmol, 100.5 mg) in anhydrous  $\text{CH}_3\text{CN}$  (3.0 mL) was catalyzed by  $\text{IPrAuOTf}$ , afforded **3e** (64.5 mg) as a light yellow solid in 64% yield; m.p: 52-53 °C  $^1\text{H}$  NMR (300 MHz,  $\text{CDCl}_3$ ): 7.19 (t,  $J = 7.8$  Hz, 1 H), 7.08 (t,  $J = 8.4$  Hz, 2 H), 6.93 (t,  $J = 7.2$  Hz, 1 H), 5.95 (s, 1 H), 4.20-4.05 (m, 2 H), 3.97 (d,  $J = 10.5$  Hz, 1 H), 3.89 (d,  $J = 11.4$  Hz, 1 H), 3.77 (t,  $J = 10.8$  Hz, 1 H), 3.55-3.35 (m, 2 H), 3.89 (d,  $J = 13.2$  Hz, 1 H), 3.02 (d,  $J = 10.4$  Hz, 1 H), 2.45-2.30 (m, 1 H), 2.21 (s, 3 H), 2.13 (s, 3 H), 1.70-1.50 (m, 4 H);  $^{13}\text{C}$  NMR (75 MHz,  $\text{CDCl}_3$ ): 149.30, 148.56, 142.59, 139.35, 128.77, 127.17, 126.84, 125.02, 123.19, 119.79, 118.43, 115.63, 71.76, 67.57, 60.59, 51.79, 28.78, 26.05, 25.39, 22.48, 21.91, 11.09 ppm. MS (70 eV):  $m/z$  (%): 335 (100). HRMS calcd for  $\text{C}_{22}\text{H}_{25}\text{NO}_2$ : 335.1885, found: 335.1885.

**29. 13-butyl-11-methyl-3,4,10,13b-tetrahydro-1H-benzo[f]furo[3,4-c][1,4]oxazino[4,3-a]azepine**

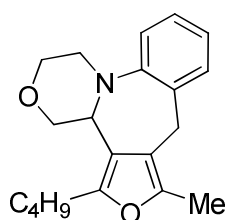



The reaction of **1f** (0.3 mmol, 93.3 mg) in anhydrous CH<sub>3</sub>CN (3.0 mL) was catalyzed by IPrAuOTf, afforded **3f** (49.5 mg) as a yellow oil in 53% yield; <sup>1</sup>H NMR (300 MHz, CDCl<sub>3</sub>): 7.11 (t, *J* = 7.5 Hz, 1 H), 6.99 (t, *J* = 8.7 Hz, 2 H), 6.85 (t, *J* = 7.5 Hz, 1 H), 4.03 (d, *J* = 13.2 Hz, 1 H), 3.89 (d, *J* = 10.5 Hz, 1 H), 3.76 (dd, *J* = 10.2, 2.7 Hz, 1 H), 3.67 (t, *J* = 10.4 Hz, 2 H), 3.46 (t, *J* = 10.5 Hz, 1 H), 3.34 (td, *J* = 10.4, 2.7 Hz, 1 H), 3.10 (d, *J* = 15.2 Hz, 1 H), 2.94 (d, *J* = 11.4 Hz, 1 H), 2.27 (t, *J* = 7.5 Hz, 2 H), 2.11 (s, 3 H), 1.52-1.32 (m, 2 H), 1.30-1.10 (m, 2 H), 0.79 (t, *J* = 7.5 Hz, 3 H); <sup>13</sup>C NMR (75 MHz, CDCl<sub>3</sub>): 149.31, 149.22, 142.48, 139.40, 127.14, 126.99, 123.18, 119.92, 117.11, 114.68, 72.81, 67.46, 59.72, 51.80, 30.48, 28.77, 26.40, 22.57, 13.79, 11.06 ppm. MS (70 eV): *m/z* (%): 311 (M<sup>+</sup>, 79.81), 149 (100). HRMS calcd for C<sub>20</sub>H<sub>25</sub>NO<sub>2</sub>: 311.1885, found: 311.1885.

### 30. 11-methyl-13-phenyl-1,2,3,4,10,13b-hexahydrobenzo[*f*]furo[3,4-*c*]pyrido[1,2-*a*]zepine

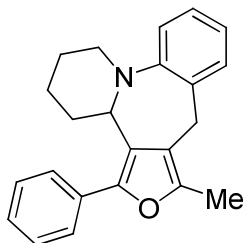

The reaction of **1g** (0.3 mmol, 98.7 mg) in anhydrous CH<sub>3</sub>CN (3.0 mL) was catalyzed by IPrAuOTf, afforded **3g** (97.7 mg) as a light yellow solid in 99% yield; m.p.: 149-150 °C; <sup>1</sup>H NMR (300 MHz, CDCl<sub>3</sub>): 7.57 (d, *J* = 7.8 Hz, 2 H), 7.40 (t, *J* = 7.5 Hz, 2 H), 7.27-7.17 (m, 2 H), 7.15 (d, *J* = 7.5 Hz, 2 H), 6.96 (t, *J* = 7.5 Hz, 1 H), 4.32-4.16 (m, 2 H), 3.42-3.15 (m, 3 H), 2.36 (s, 3 H), 2.00-1.59 (m, 6 H); <sup>13</sup>C NMR (75 MHz, CDCl<sub>3</sub>): 150.48, 144.94, 143.81, 139.83, 131.88, 128.40, 127.05, 126.37, 126.14, 124.77, 123.92, 122.60, 120.55, 119.31, 61.45, 53.81, 35.52, 28.89, 26.80, 25.34, 11.28 ppm. MS (70 eV): *m/z* (%): 329 (100). Anal, calcd for C<sub>23</sub>H<sub>23</sub>NO: C, 83.85, H, 7.04, N, 4.25, found: C, 83.64, H, 6.97, N, 4.30.

**31. 11-methyl-13-p-tolyl-1,2,3,4,10,13b-hexahydrobenzo[f]furo[3,4-c]pyrido[1,2-a]azepine**

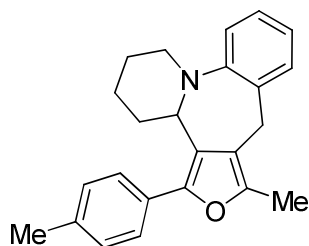

The reaction of **1h** (0.3 mmol, 102.9 mg) in anhydrous CH<sub>3</sub>CN (3.0 mL) was catalyzed by IPrAuOTf, afforded **3h** (97.8 mg) as a light yellow solid in 95% yield; m.p.: 137-139 °C; <sup>1</sup>H NMR (300 MHz, CDCl<sub>3</sub>): 7.44 (d, *J* = 7.8 Hz, 2 H), 7.35-7.05 (m, 5 H), 7.00-6.85 (m, 1 H), 4.32-4.05 (m, 2 H), 3.42-3.05 (m, 3 H), 2.36 (s, 3 H), 2.33 (s, 3 H), 2.00-1.50 (m, 6 H); <sup>13</sup>C NMR (75 MHz, CDCl<sub>3</sub>): 150.55, 145.19, 143.40, 139.86, 135.88, 129.20, 129.12, 127.03, 126.40, 124.79, 123.12, 122.58, 120.55, 119.15, 61.48, 53.84, 35.50, 28.93, 26.83, 25.36, 21.14, 11.28 ppm. MS (70 eV): *m/z* (%): 343 (100). HRMS calcd for C<sub>24</sub>H<sub>25</sub>NO: 343.1936, found: 343.1936.

**32. 13-(4-methoxyphenyl)-11-methyl-1,2,3,4,10,13b-hexahydrobenzo[f]furo[3,4-c]pyrido[1,2-a]azepine**

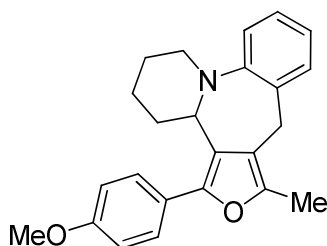

The reaction of **1i** (0.3 mmol, 107.7 mg) in anhydrous CH<sub>3</sub>CN (3.0 mL) was catalyzed by IPrAuOTf, afforded **3i** (100.2 mg) as a yellow solid in 93% yield; m.p.: 138-139 °C; <sup>1</sup>H NMR (300 MHz, CDCl<sub>3</sub>): 7.46 (d, *J* = 8.7 Hz, 2 H), 7.23-7.05 (m, 3 H), 7.00-6.80 (m, 3 H), 4.23 (d, *J* = 6.9 Hz, 1 H), 4.13 (d, *J* = 8.7 Hz, 1 H), 3.82 (s, 3 H), 3.40-3.10 (m, 3 H), 2.32 (s, 3 H), 2.00-1.50 (m, 6 H); <sup>13</sup>C NMR (75 MHz, CDCl<sub>3</sub>): 158.04, 150.57, 145.09, 143.06, 139.87, 127.02, 126.42, 126.33, 124.99, 122.58, 122.23, 120.53, 119.05, 113.90, 61.47, 55.21, 53.85, 35.57, 28.96, 26.86, 25.37, 11.24 ppm. MS (70 eV): *m/z* (%): 359 (100).

HRMS calcd for C<sub>24</sub>H<sub>25</sub>NO<sub>2</sub>: 359.1885, found: 359.1884.

### 33. 13-cyclopropyl-11-methyl-1,2,3,4,10,13b-hexahydrobenzo[f]furo[3,4-c]pyrido[1,2-a]azepine

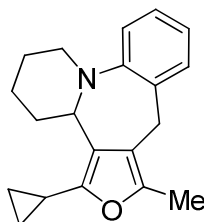

The reaction of **1j** (0.35 mmol, 102.6 mg) in anhydrous CH<sub>3</sub>CN (3.5 mL) was catalyzed by IPrAuOTf, afforded **3j** (62.6 mg) as a light yellow oil in 61% yield; <sup>1</sup>H NMR (300 MHz, CDCl<sub>3</sub>): 7.26-7.15 (m, 1 H), 7.11 (t, *J* = 7.5 Hz, 2 H), 6.93 (t, *J* = 7.2 Hz, 1 H), 4.14 (d, *J* = 13.2 Hz, 1 H), 3.85-3.75 (m, 1 H), 3.35 (d, *J* = 4.2 Hz, 1 H), 3.25-3.10 (m, 2 H), 2.20 (s, 3 H), 2.05-1.87 (m, 2 H), 1.87-1.70 (m, 3 H), 1.69-1.55 (m, 2 H), 0.95-0.65 (m, 4 H); <sup>13</sup>C NMR (75 MHz, CDCl<sub>3</sub>): 150.71, 147.37, 140.75, 139.83, 126.89, 126.57, 122.44, 121.22, 120.55, 117.65, 60.61, 53.76, 36.77, 28.91, 26.86, 25.31, 11.02, 7.59, 6.31, 5.33 ppm. MS (70 eV): *m/z* (%): 293 (100). HRMS calcd for C<sub>20</sub>H<sub>23</sub>NO: 293.1780, found: 293.1780.

### 34. Synthesis of **3k**.

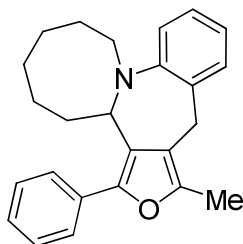

The reaction of **1k** (0.3 mmol, 107.1 mg) in anhydrous CH<sub>3</sub>CN (3.0 mL) was catalyzed by IPrAuOTf, afforded **3k** (100.7 mg) as a light yellow oil in 94% yield; <sup>1</sup>H NMR (300 MHz, CDCl<sub>3</sub>): 7.60 (d, *J* = 7.8 Hz, 2 H), 7.50-7.40 (m, 2 H), 7.35-7.25 (m, 1 H), 7.24-7.05 (m, 3 H), 6.86 (t, *J* = 7.2 Hz, 1 H), 4.95 (dd, *J* = 10.2, 4.2 Hz, 1 H), 4.23 (d, *J* = 16.2 Hz, 1 H), 3.85 (d, *J* = 15.3 Hz, 1 H), 3.74 (d, *J* = 16.2 Hz, 1 H), 3.35-3.20 (m, 1 H), 2.37 (s, 3 H), 2.20-1.50 (m, 10 H); <sup>13</sup>C

NMR (75 MHz, CDCl<sub>3</sub>): 148.40, 145.10, 144.50, 131.83, 130.20, 130.08, 128.50, 127.10, 126.57, 125.57, 124.19, 120.09, 119.74, 118.50, 57.98, 54.67, 34.56, 31.23, 28.02, 27.26, 26.69, 23.91, 11.31 ppm. MS (70 eV): m/z (%): 357 (M<sup>+</sup>, 47.25), 273 (100). HRMS calcd for C<sub>25</sub>H<sub>27</sub>NO: 357.2092, found: 357.2029.

**35. 5-benzyl-1-methyl-3,4-diphenyl-5,10-dihydro-4H-benzo[b]furo[3,4-e]azepine**

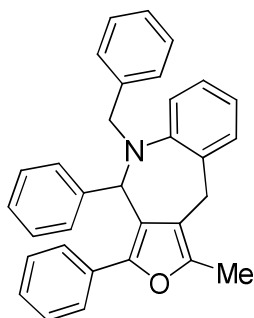

The reaction of **11** (0.25 mmol, 110.3 mg) in anhydrous CH<sub>3</sub>CN (2.5 mL) was catalyzed by IPrAuOTf, afforded **31** (107.0 mg) as a yellow solid in 97% yield; m.p.: 62-63 °C; <sup>1</sup>H NMR (300 MHz, CDCl<sub>3</sub>): 7.48 (d, *J* = 7.5 Hz, 2 H), 7.29 (t, *J* = 7.5 Hz, 2 H), 7.23-7.11 (m, 4 H), 7.10-6.96 (m, 6 H), 6.95-6.88 (m, 2 H), 6.85-6.70 (m, 2 H), 6.50-6.35 (m, 1 H), 5.49 (s, 1 H), 4.42 (dd, *J* = 14.7, 2.7 Hz, 1 H), 4.28 (d, *J* = 14.7 Hz, 2 H), 3.57 (d, *J* = 14.7 Hz, 1 H), 2.41 (s, 3 H); <sup>13</sup>C NMR (75 MHz, CDCl<sub>3</sub>): 147.86, 145.98, 144.69, 139.03, 138.97, 136.15, 131.15, 128.65, 128.48, 128.26, 128.17, 127.86, 127.27, 127.03, 126.77, 126.63, 126.20, 125.35, 124.31, 123.42, 122.27, 118.39, 61.37, 57.26, 30.19, 11.61 ppm. MS (70 eV): m/z (%): 441 (M<sup>+</sup>, 27.47), 350 (100). HRMS calcd for C<sub>32</sub>H<sub>27</sub>NO: 441.2094, found: 441.2093.

**36. 5-ethyl-1,4-dimethyl-3-phenyl-5,10-dihydro-4H-benzo[b]furo[3,4-e]azepine**

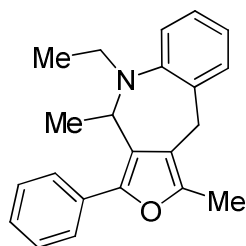

The reaction of **1m** (0.35 mmol, 111.0 mg) in anhydrous CH<sub>3</sub>CN (3.5 mL) was catalyzed by IPrAuOTf, afforded **3m** (103.2 mg) as a yellow solid in 93% yield; <sup>1</sup>H NMR (300 MHz, CDCl<sub>3</sub>): 7.54 (d, *J* = 8.4 Hz, 2 H), 7.35 (t, *J* = 7.5 Hz, 2 H), 7.19 (t, *J* = 7.5 Hz, 3 H), 7.09 (d, *J* = 7.8 Hz, 1 H), 6.99 (t, *J* = 7.2 Hz, 1 H), 4.82 (q, *J* = 6.6 Hz, 1 H), 4.12 (d, *J* = 14.4 Hz, 1 H), 3.55-3.30 (m, 2 H), 3.20-3.00 (m, 1 H), 2.33 (s, 3 H), 1.16 (t, *J* = 7.5 Hz, 3 H), 0.97 (d, *J* = 6.6 Hz, 3 H); <sup>13</sup>C NMR (75 MHz, CDCl<sub>3</sub>): 147.08, 144.66, 144.12, 137.77, 132.18, 128.42, 126.47, 126.26, 125.51, 125.09, 124.15, 123.47, 117.35, 54.33, 47.01, 29.95, 16.15, 14.51, 11.45 ppm. MS (70 eV): *m/z* (%): 317 (M<sup>+</sup>, 15.18), 302 (100). HRMS calcd for C<sub>22</sub>H<sub>23</sub>NO: 317.1780, found: 317.1780.

**37. 7-bromo-11-methyl-13-phenyl-3,4,10,13b-tetrahydro-1H-benzo[f]furo [3,4-c][1,4]oxazino[4,3-a]azepine**

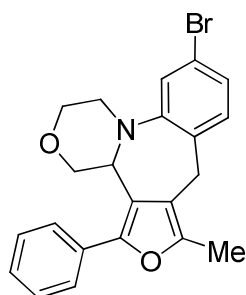

The reaction of **1n** (0.25 mmol, 102.5 mg) in anhydrous CH<sub>3</sub>CN (3.5 mL) was catalyzed by IPrAuOTf, afforded **3n** (71.8 mg) as a yellow solid in 70% yield; m.p.: 174-175 °C; <sup>1</sup>H NMR (300 MHz, CDCl<sub>3</sub>): 7.54 (d, *J* = 7.8 Hz, 2 H), 7.34 (t, *J* = 7.5 Hz, 2 H), 7.25-7.15 (m, 2 H), 7.14-7.05 (m, 1 H), 7.00 (d, *J* = 8.1 Hz, 1 H), 4.40 (dd, *J* = 9.9, 2.7 Hz, 1 H), 4.14 (d, *J* = 13.5 Hz, 1 H), 4.00 (d, *J* = 10.8 Hz, 1 H), 3.90-3.70 (m, 2 H), 3.60-3.40 (m, 2 H), 3.24 (d, *J* = 13.5 Hz, 1 H), 3.05 (d, *J* = 10.8 Hz, 1 H), 2.31 (s, 3 H); <sup>13</sup>C NMR (75 MHz, CDCl<sub>3</sub>): 150.59,

146.37, 144.59, 138.16, 131.12, 128.68, 128.17, 126.89, 126.31, 124.91, 123.61, 120.47, 118.58, 117.18, 71.41, 67.41, 60.74, 51.86, 28.32, 11.29 ppm. MS (70 eV):  $m/z$  (%): 409 ( $M^+$ , 96.87), 411 (100). Anal, calcd for  $C_{22}H_{20}BrNO_2$ : C, 64.40, H, 4.91, N, 3.41, found: C, 64.49, H, 4.99, N, 3.45.

**38. 8-bromo-11-phenyl-13-p-tolyl-1,2,3,4,10,13b-hexahydrobenzo[f]furo[3,4-c]pyrido[1,2-a]azepine)**

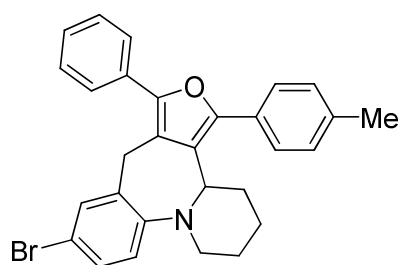

The reaction of **1o** (0.25 mmol, 120.8 mg) in anhydrous  $CH_3CN$  (3.5 mL) was catalyzed by  $IPrAuOTf$ , afforded **3o** (112.3 mg) as a yellow solid in 93% yield; m.p.: 257-258 °C;  $^1H$  NMR (300 MHz,  $CDCl_3$ ): 7.69 (d,  $J = 7.5$  Hz, 2 H), 7.60-7.40 (m, 4 H), 7.39-7.26 (m, 2 H), 7.26-7.15 (m, 3 H), 6.98 (d,  $J = 8.4$  Hz, 1 H), 4.41 (d,  $J = 13.2$  Hz, 1 H), 4.22 (d,  $J = 9.6$  Hz, 2 H), 3.74 (d,  $J = 13.2$  Hz, 1 H), 3.32 (d,  $J = 10.8$  Hz, 1 H), 3.25-3.10 (m, 1 H), 2.37 (s, 3 H), 2.00-1.60 (m, 6 H);  $^{13}C$  NMR (75 MHz,  $CDCl_3$ ):  $\delta = 149.43, 146.81, 145.90, 141.28, 136.79, 131.01, 129.99, 129.52, 129.25, 128.64, 127.27, 126.45, 125.36, 124.17, 122.04, 119.93, 115.26, 61.43, 53.67, 35.54, 29.03, 26.63, 25.25, 21.21$  ppm. MS (70 eV):  $m/z$  (%): 483 ( $M^+$ , 8.63), 43 (100). HRMS calcd for  $C_{29}H_{26}BrNO$ : 483.1198, found: 483.1195.

**39. 1-(5-benzoyl-2,4,4a,7-tetrahydro-1H-benzo[f][1,4]oxazino[4,3-a]azepin-6-yl)ethanone**

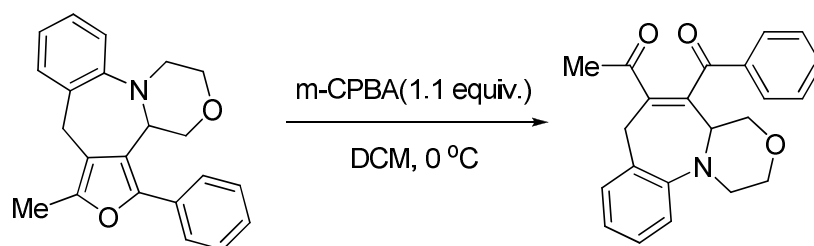

To a solution of **3a** (115.9 mg, 0.35 mmol) in DCM (3.5 mL) was added

*m*-CPBA (85%, 78.7 mg, 0.39 mmol) at 0 °C, then the reaction mixture was allowed to stirred at 0 °C and monitored by TLC. Upon the complete consumption of **3a**, aqueous Na<sub>2</sub>S<sub>2</sub>O<sub>3</sub> solution (5 mL, 1 mol·L<sup>-1</sup>) was added and the product was extracted with DCM three times, the organic layer was then washed with brine and dried with Na<sub>2</sub>SO<sub>4</sub>. After filtration and concentration under reduced pressure, the crude product was purified by column chromatography to give compound **4** as a yellow solid in 81% yield (98.9 mg). m.p.: 192-193 °C; <sup>1</sup>H NMR (300 MHz, CDCl<sub>3</sub>): 7.50-7.40 (m, 3 H), 7.38-7.23 (m, 3 H), 7.17 (d, *J* = 6.3 Hz, 1 H), 7.10-7.00 (m, 2 H), 4.58 (d, *J* = 13.8 Hz, 1 H), 4.10-3.90 (m, 2 H), 3.88-3.75 (m, 2 H), 3.68 (d, *J* = 9.0 Hz, 1 H), 3.32-3.20 (m, 2 H), 3.07 (d, *J* = 11.7 Hz, 1 H), 2.23 (s, 3 H); <sup>13</sup>C NMR (75 MHz, CDCl<sub>3</sub>): 199.75, 196.17, 148.32, 142.93, 142.23, 138.75, 135.59, 133.17, 128.60, 128.57, 128.17, 126.42, 122.94, 119.11, 69.36, 67.38, 63.93, 50.98, 31.29, 28.90 ppm. MS (70 eV): *m/z* (%): 347 (M<sup>+</sup>, 79.22), 105 (100). HRMS calcd for C<sub>22</sub>H<sub>21</sub>NO<sub>3</sub>: 347.1521, found: 347.1520.

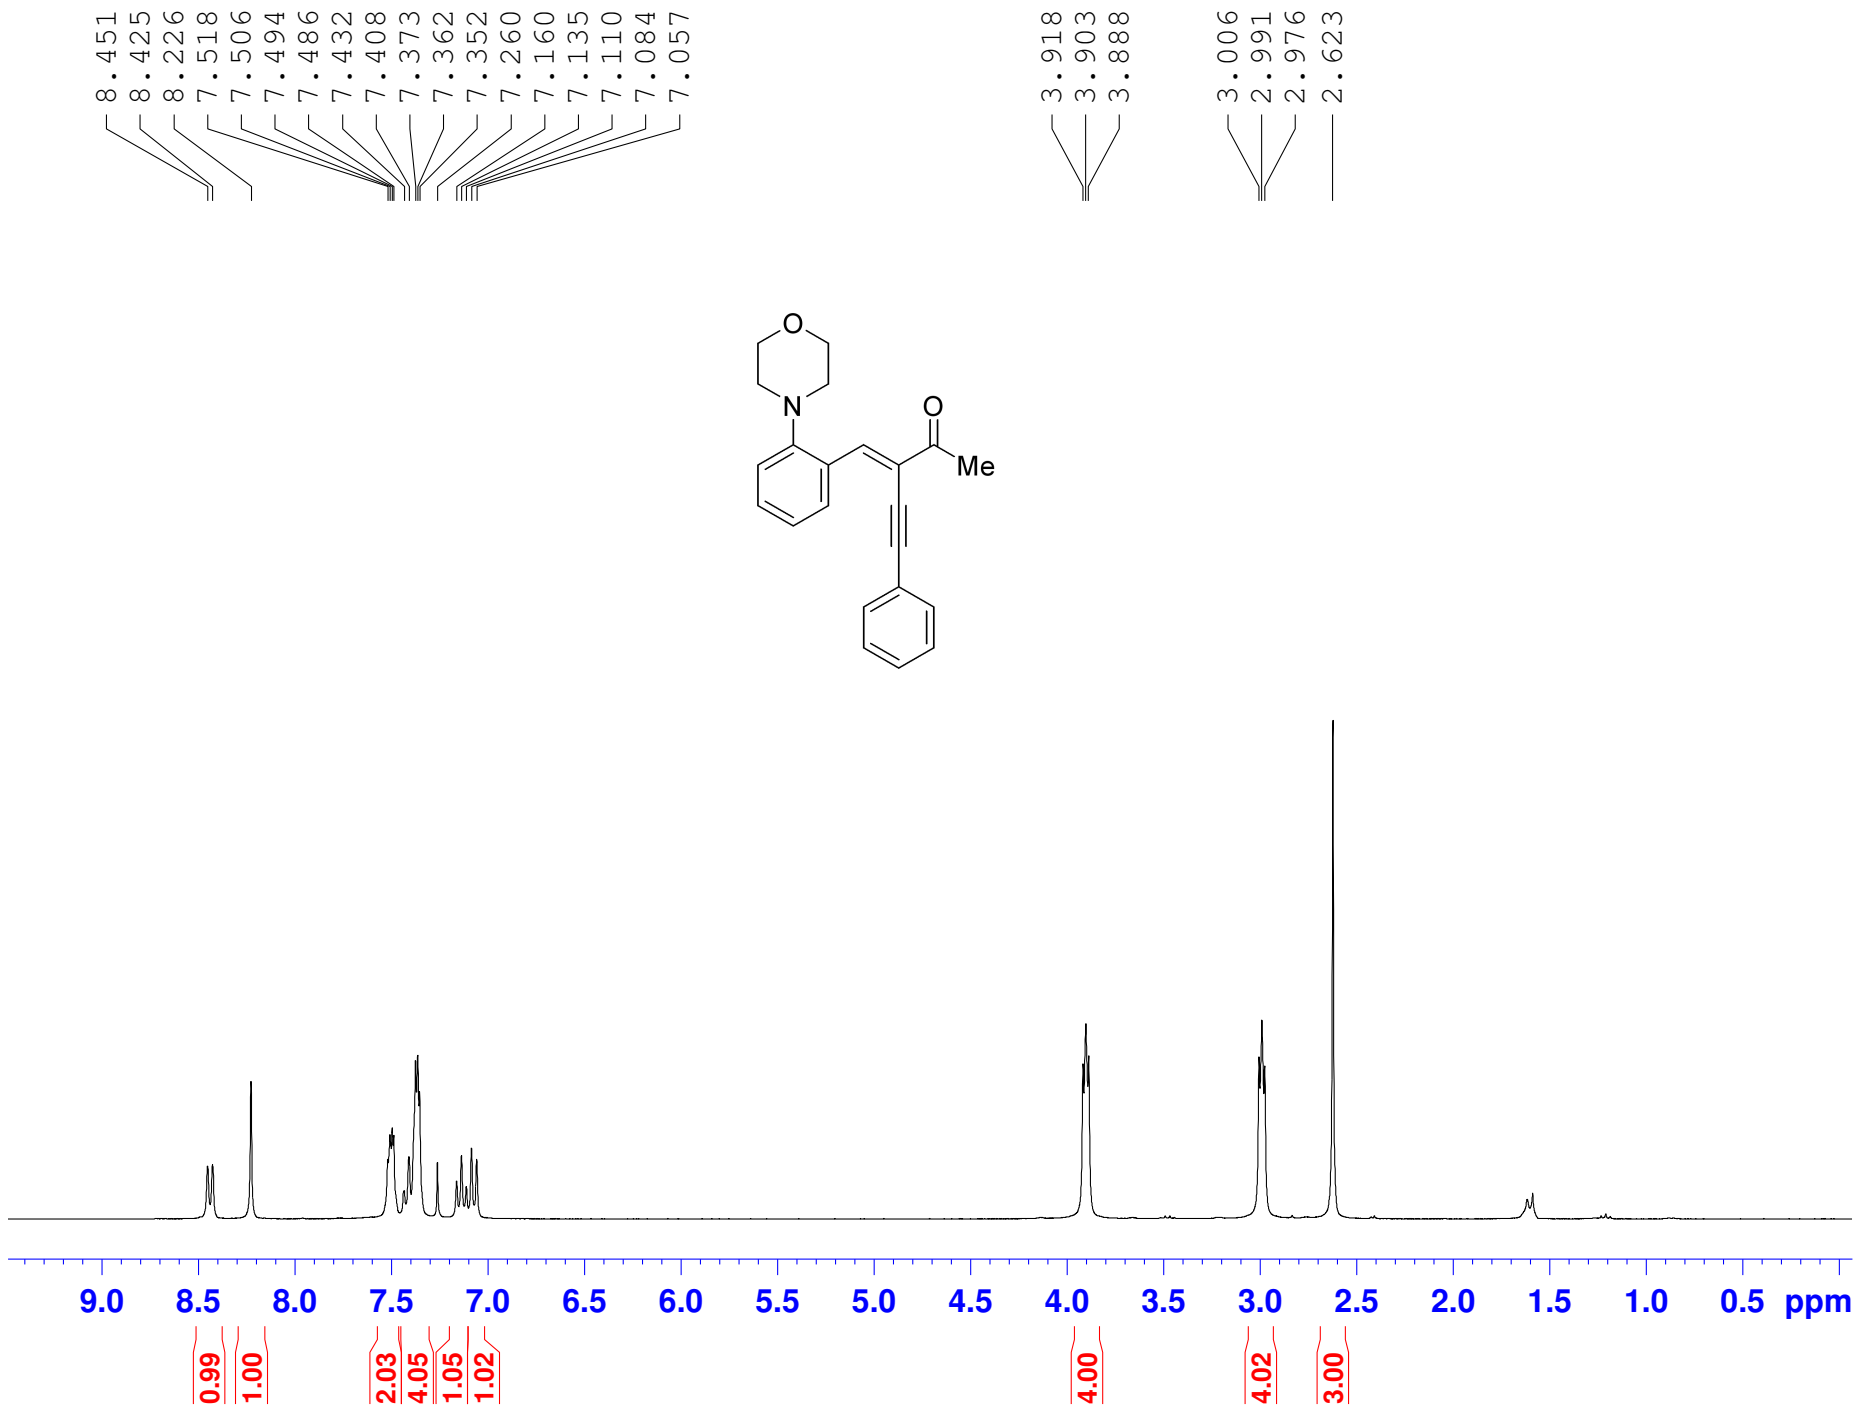



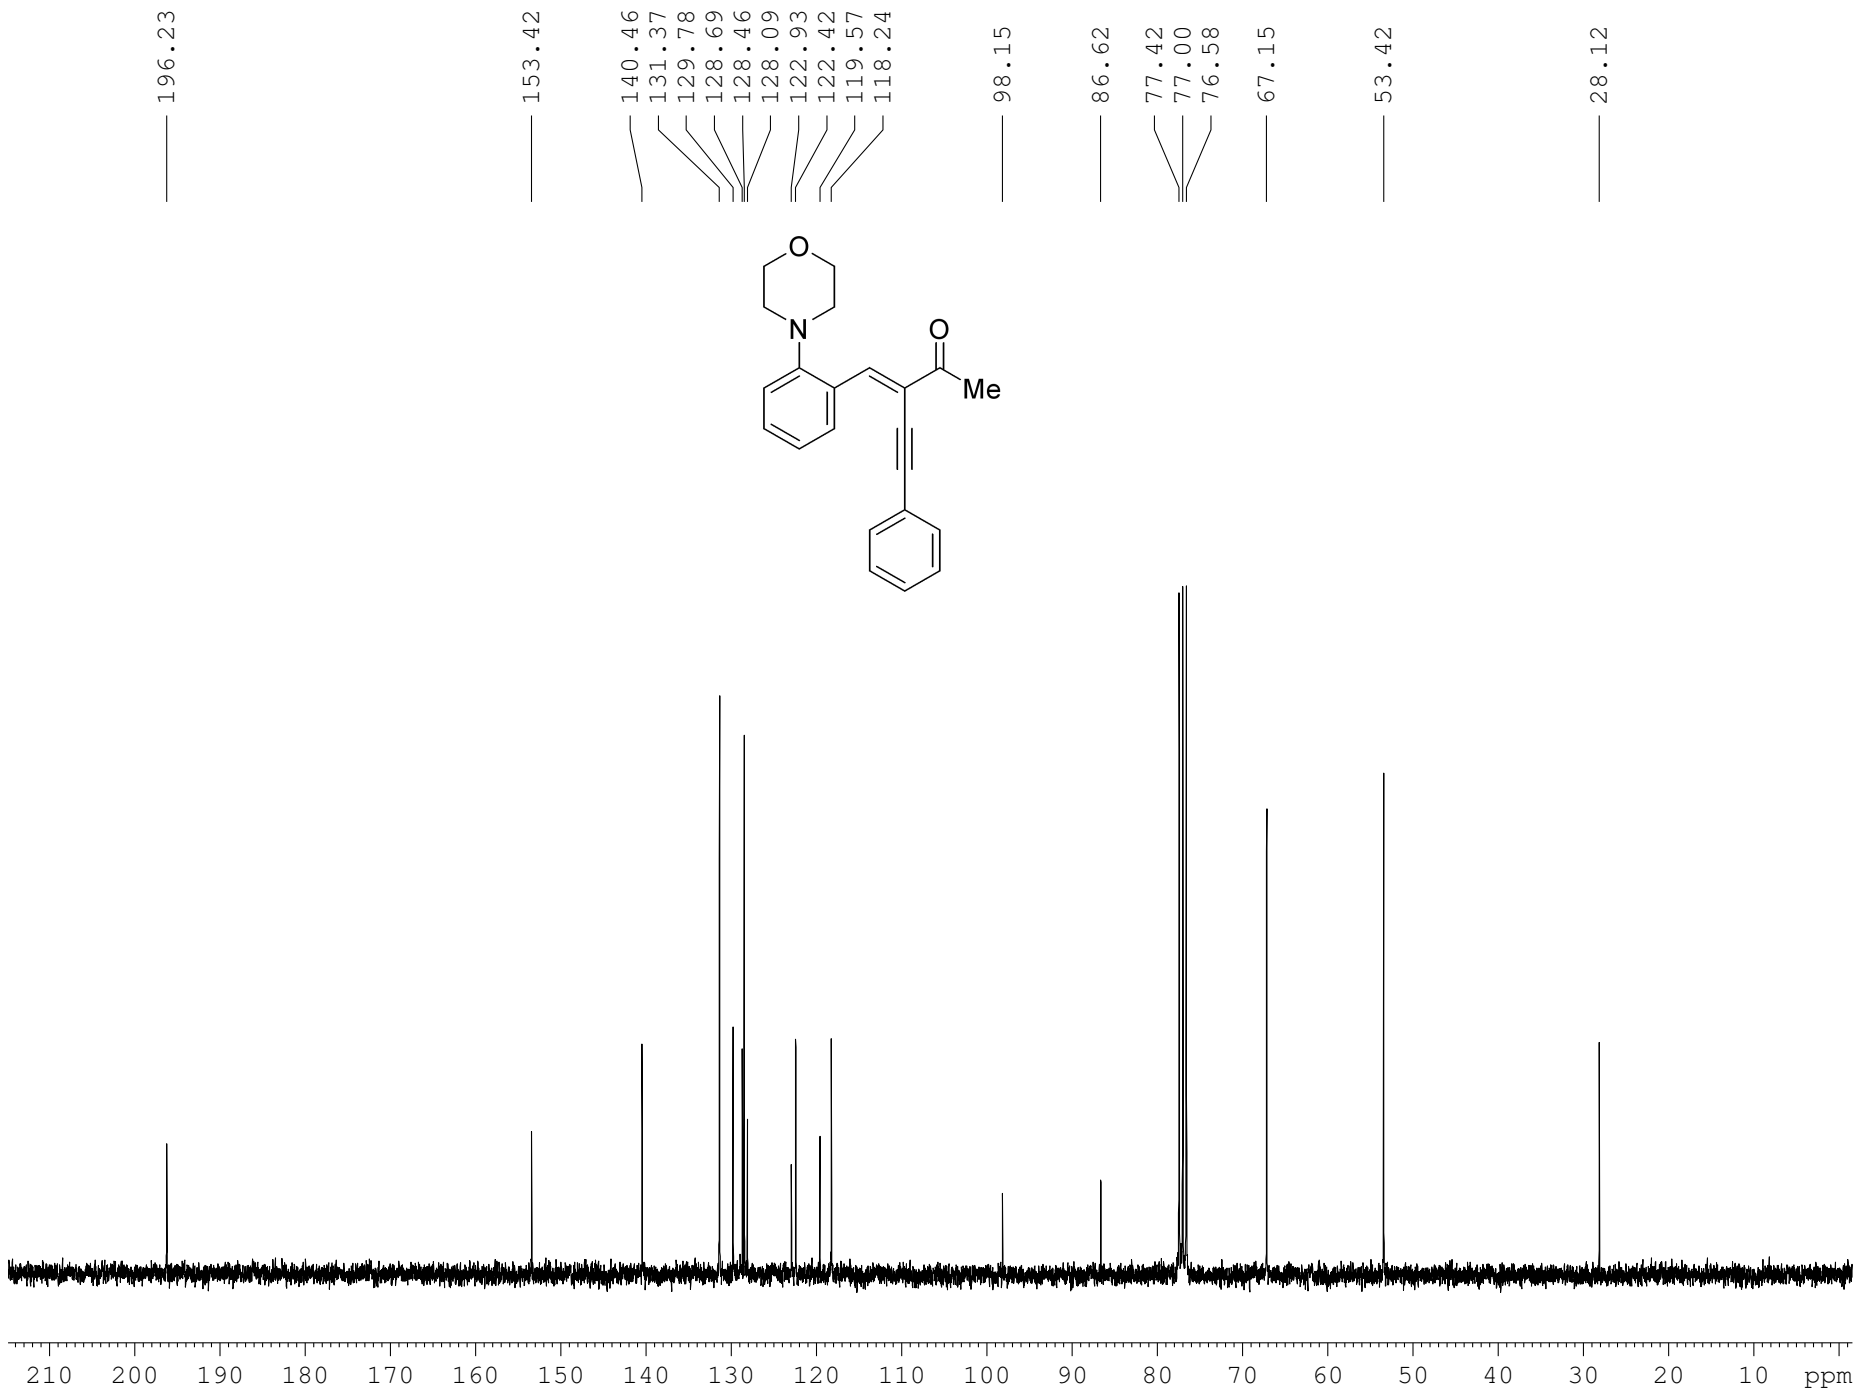

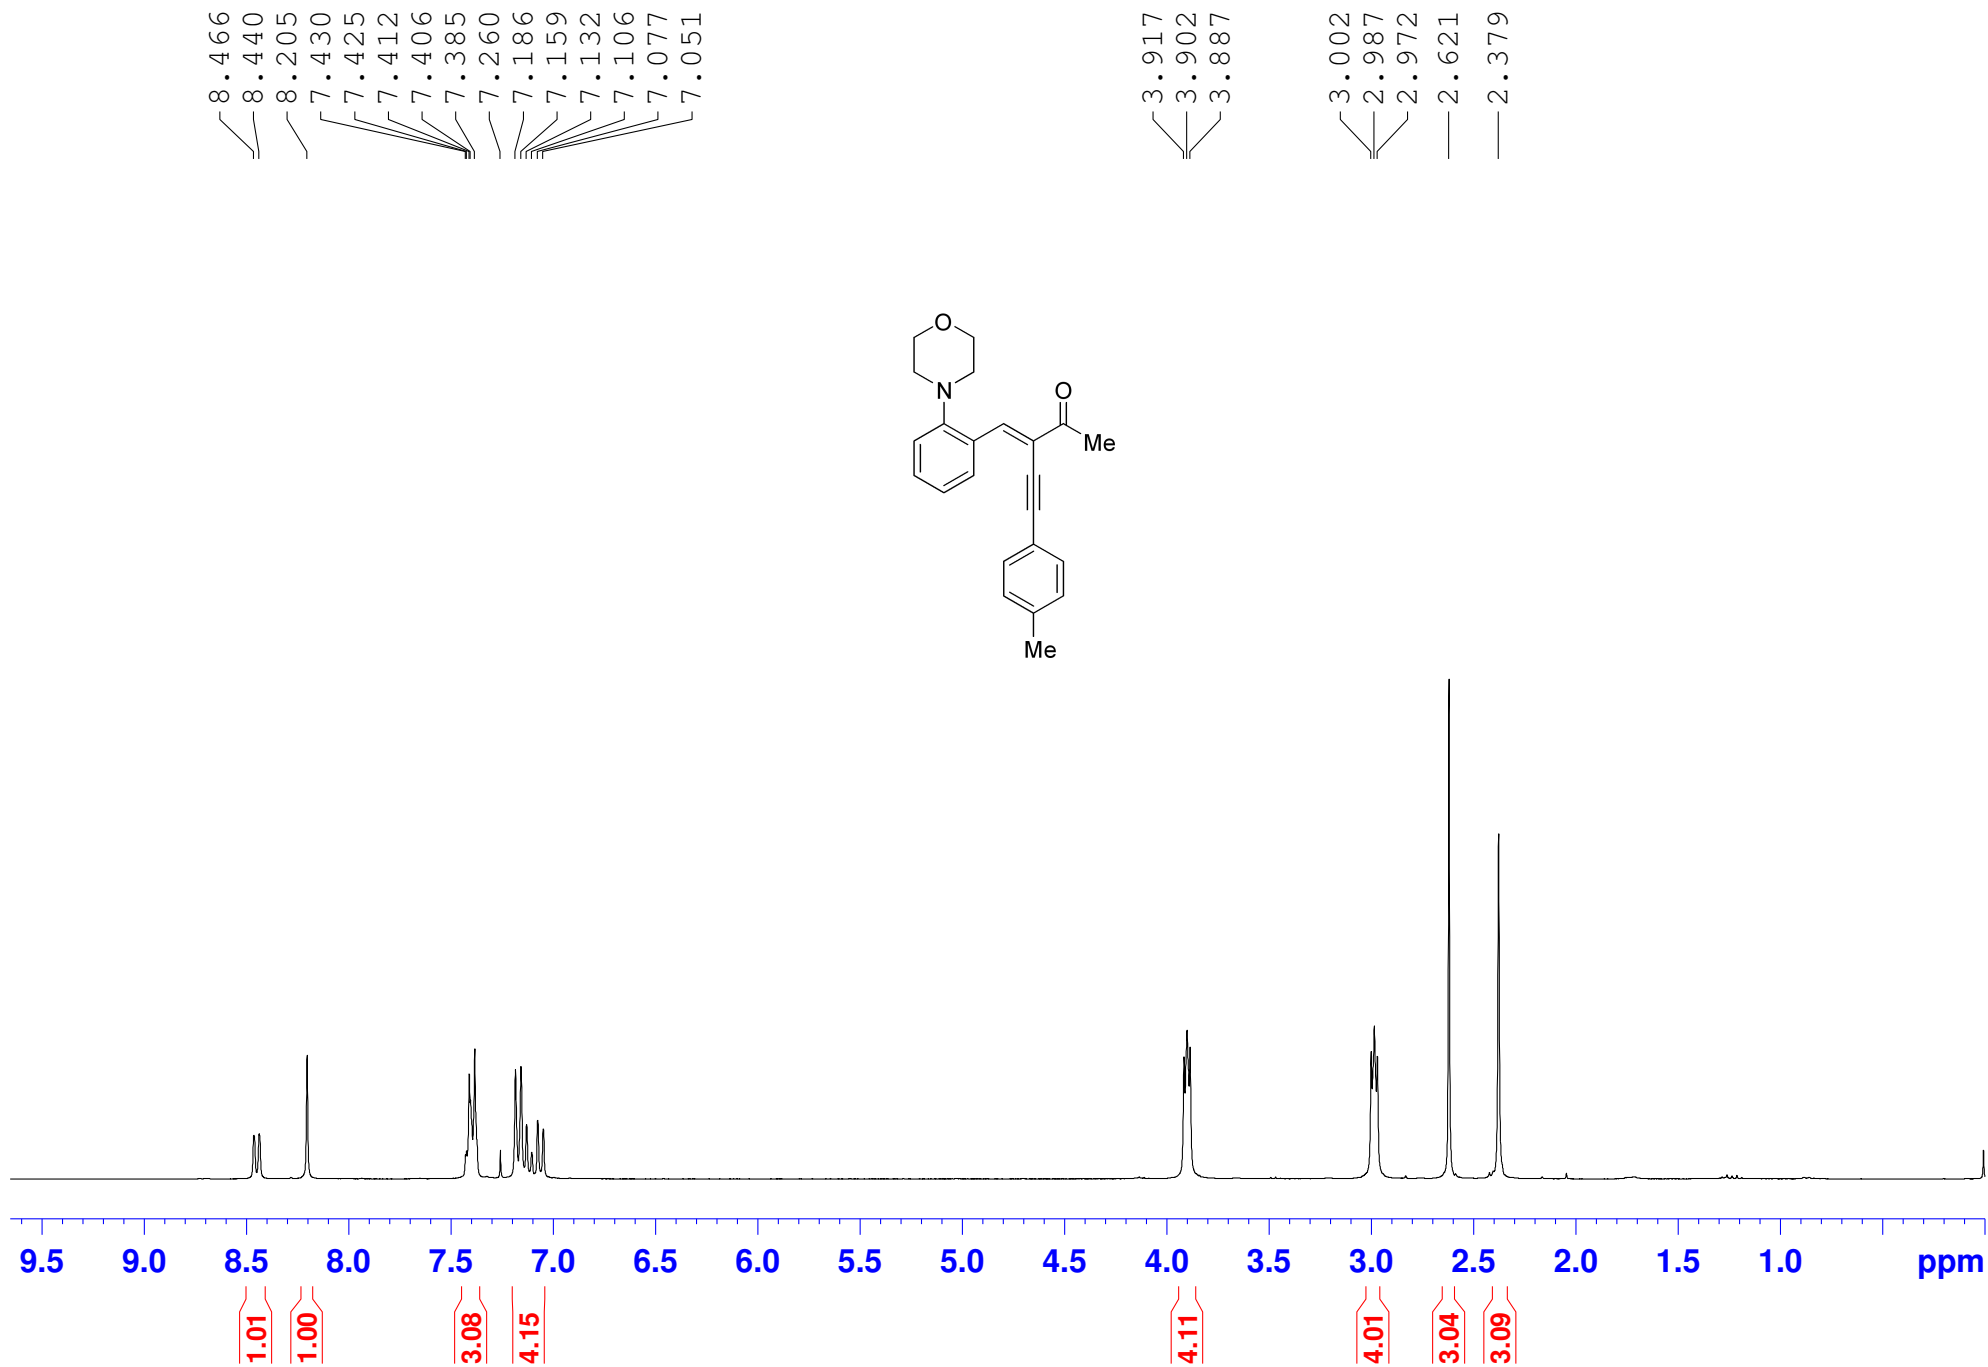

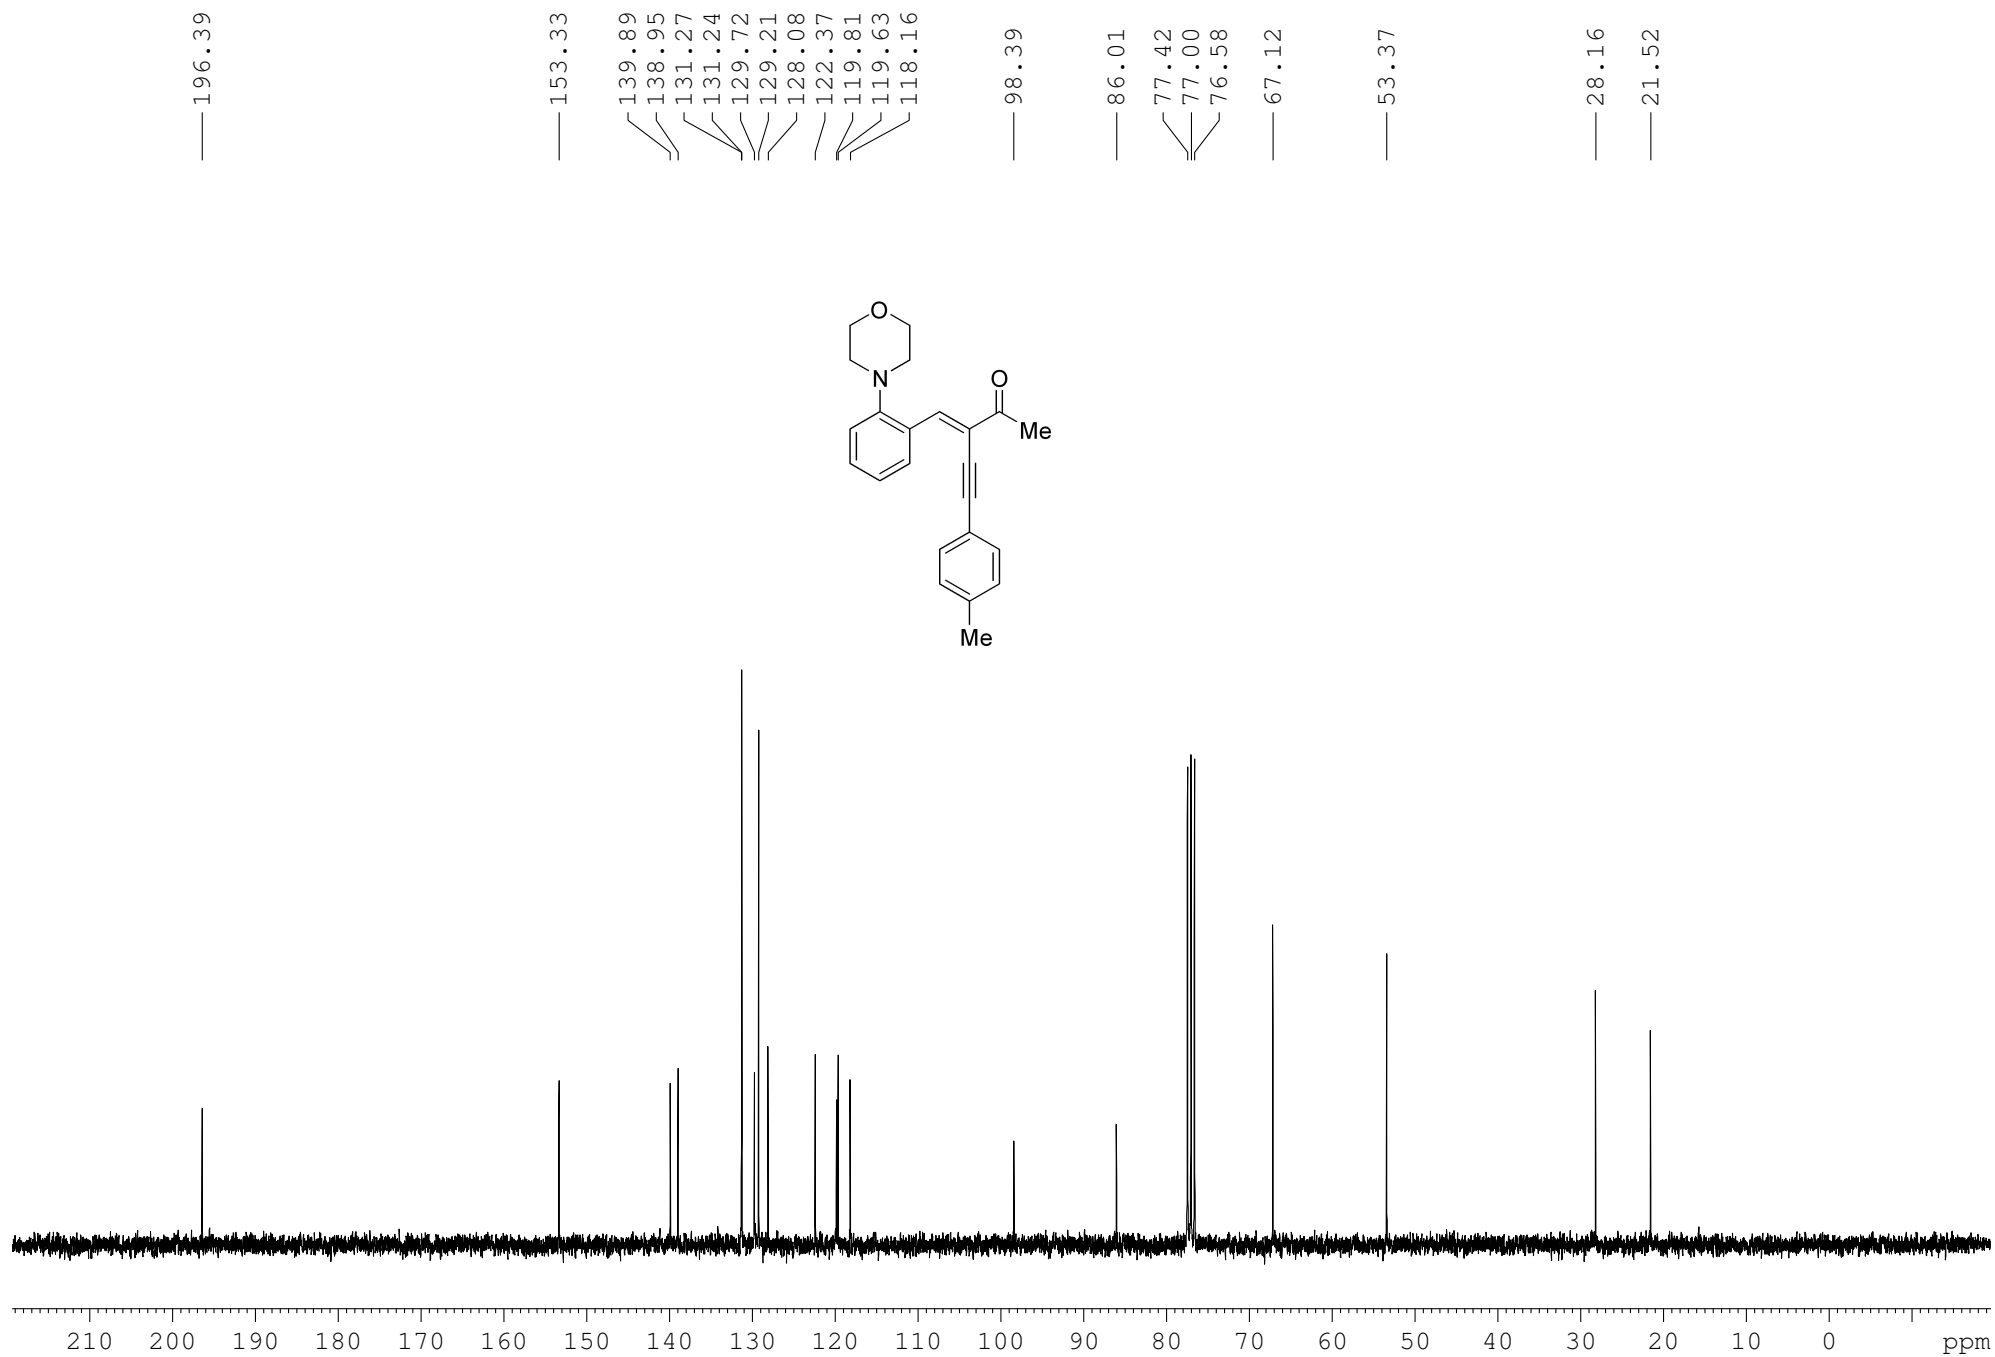

8.460  
8.434  
8.174  
7.461  
7.452  
7.446  
7.423  
7.395  
7.372  
7.367  
7.260  
7.154  
7.129  
7.104  
7.073  
7.047  
6.904  
6.874

3.912  
3.898  
3.882  
3.830

2.998  
2.983  
2.968  
2.614

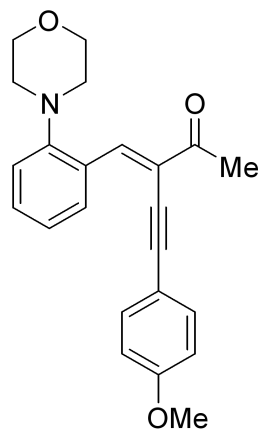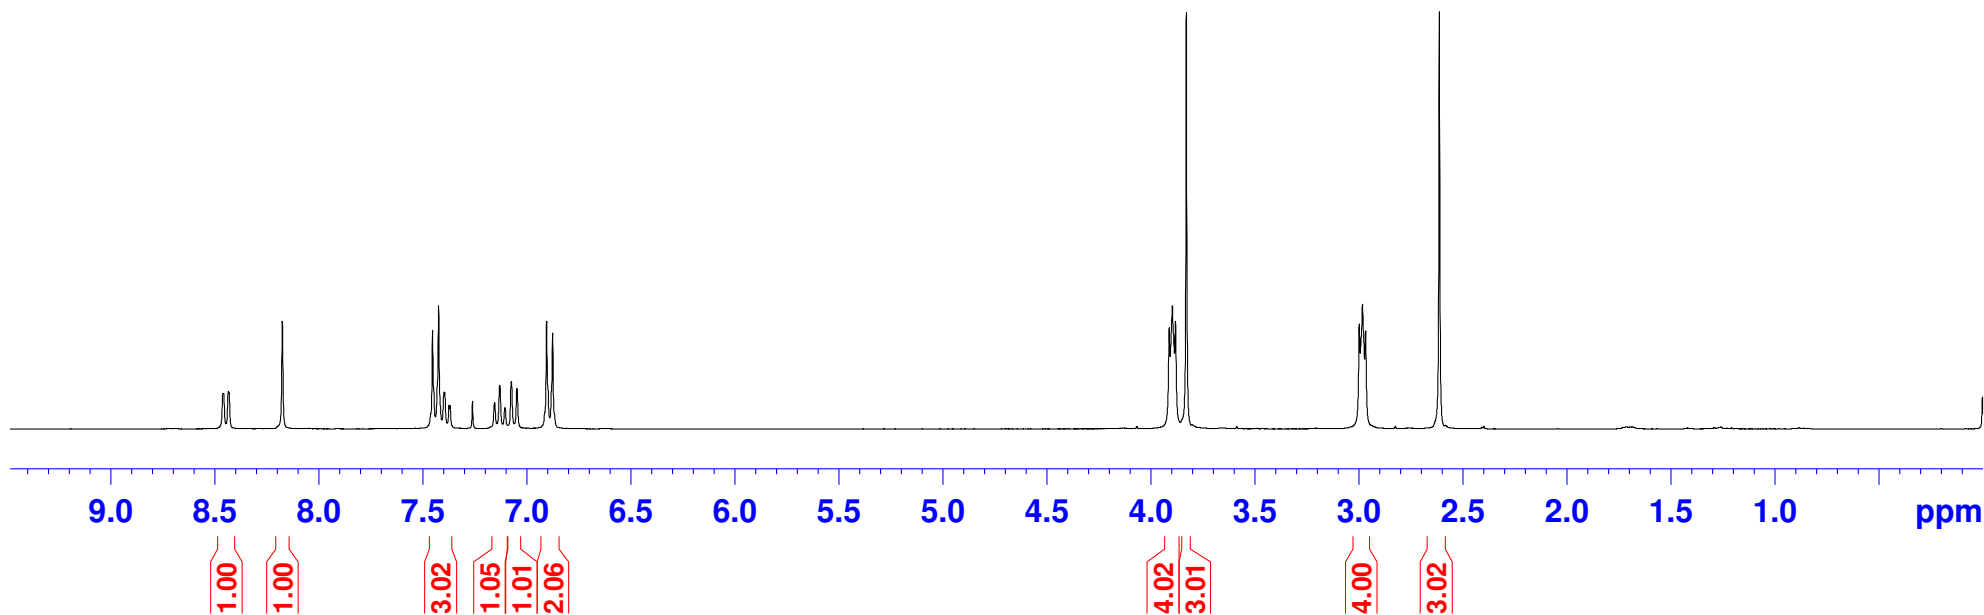

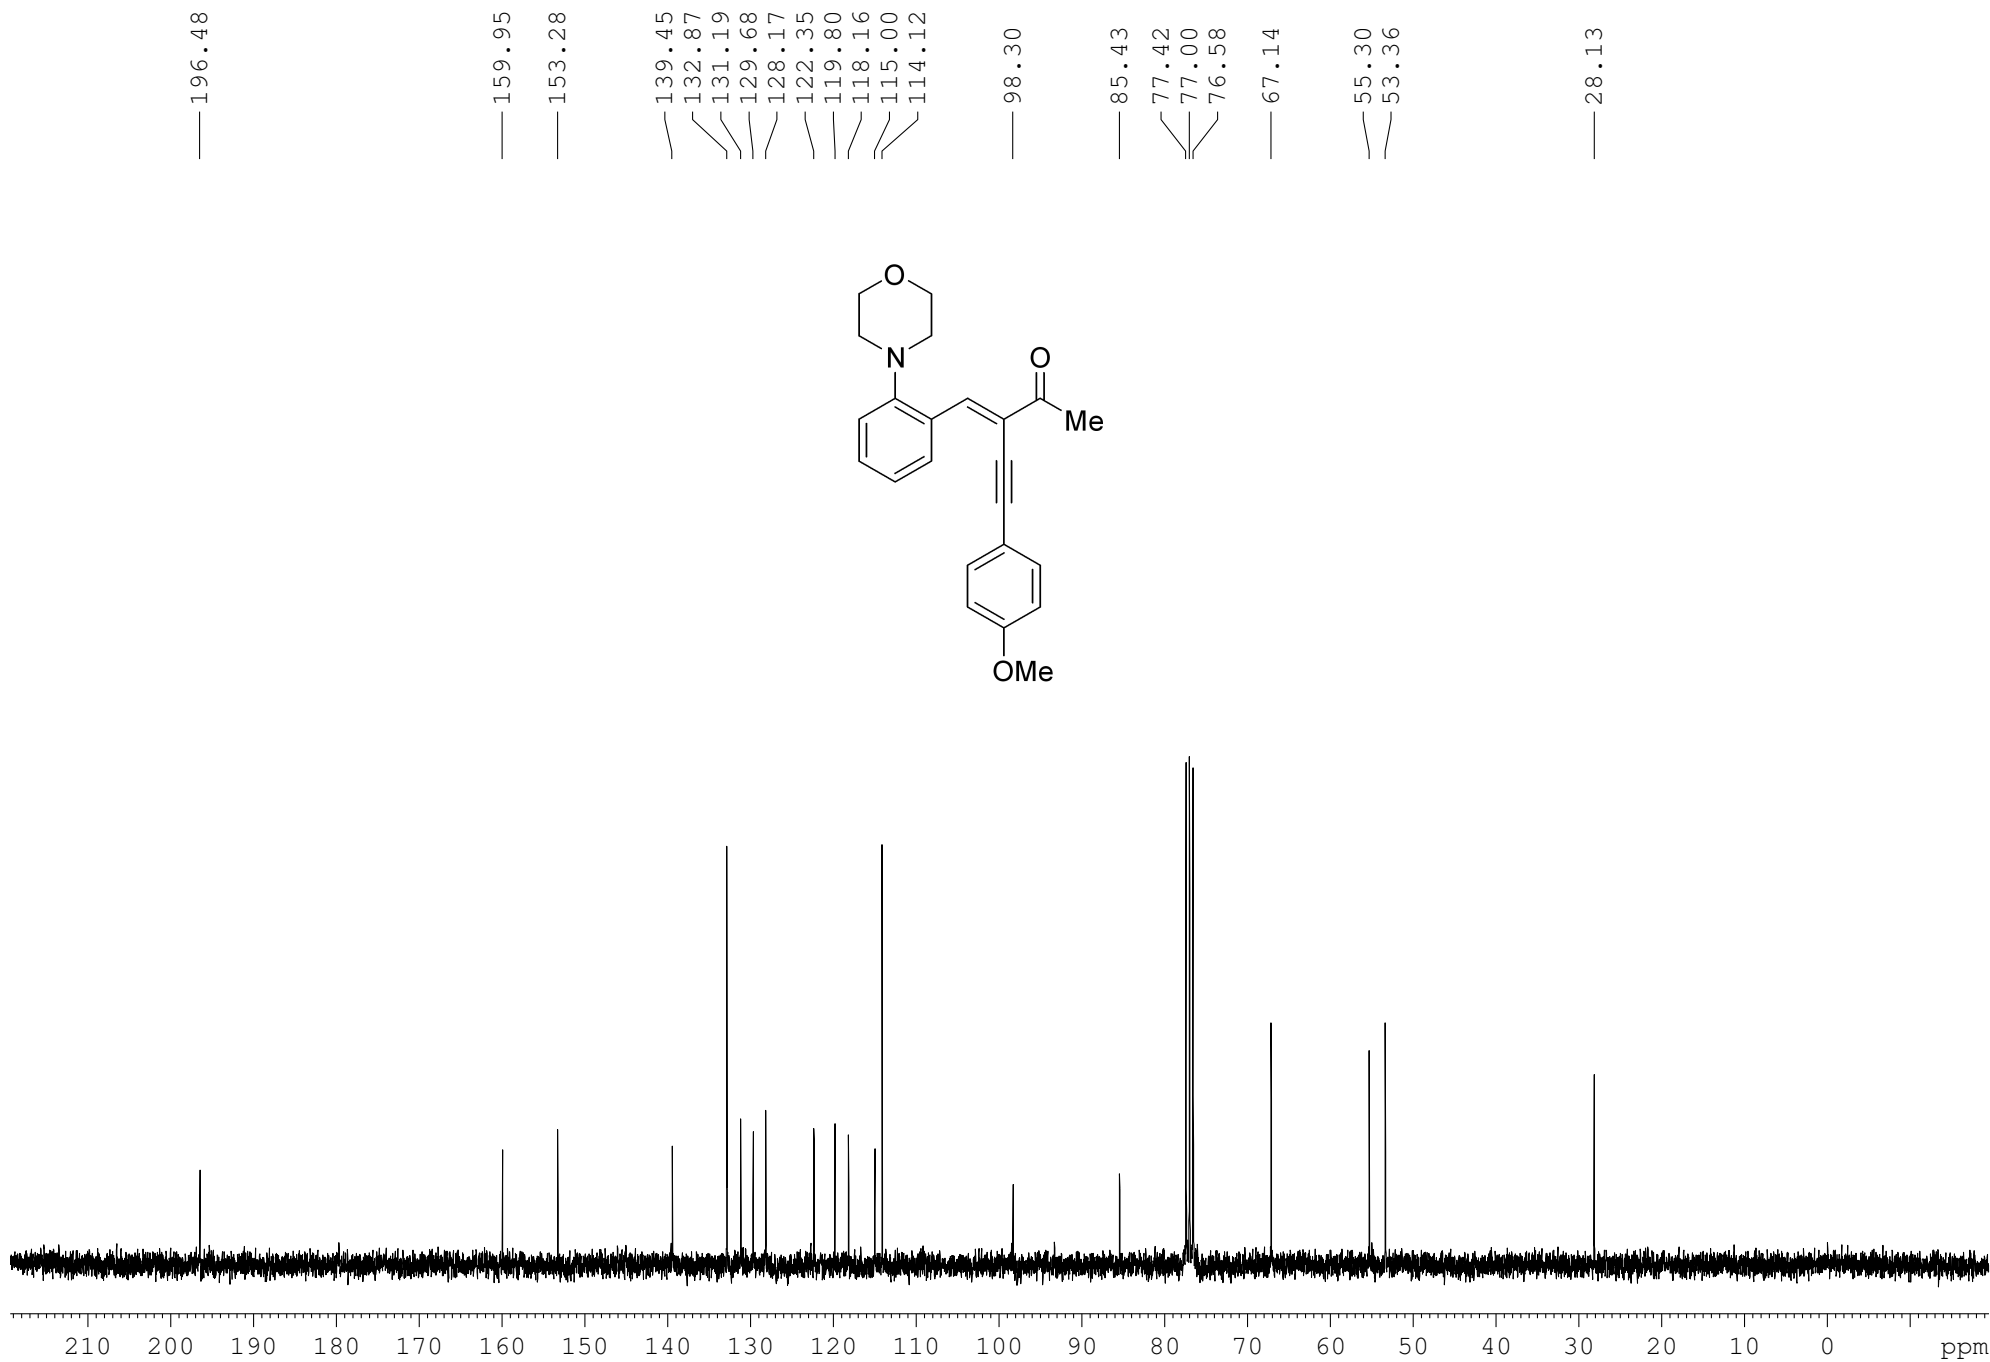

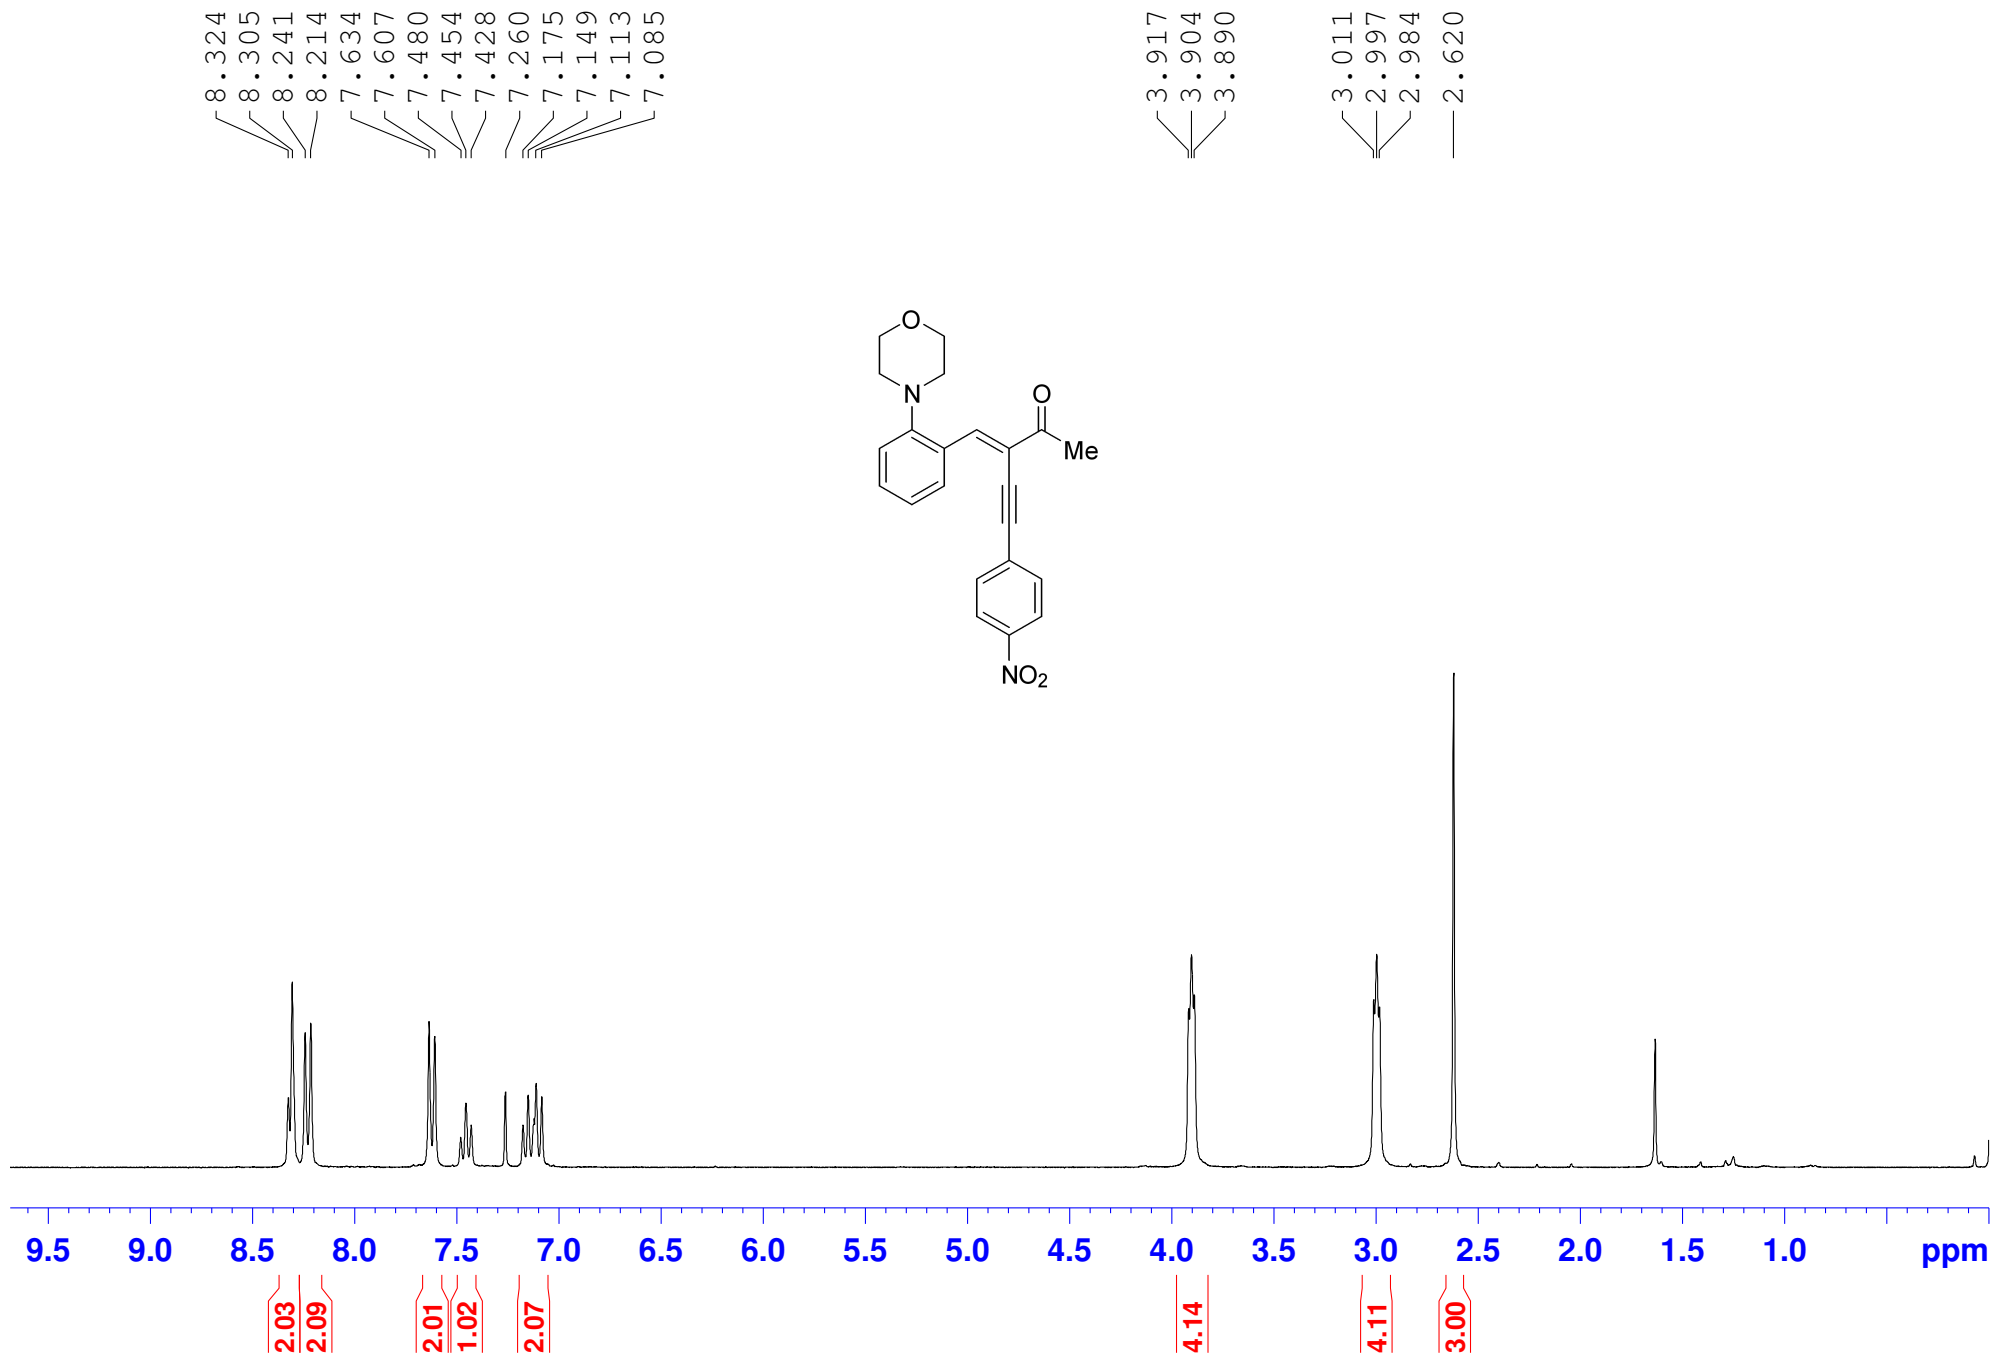

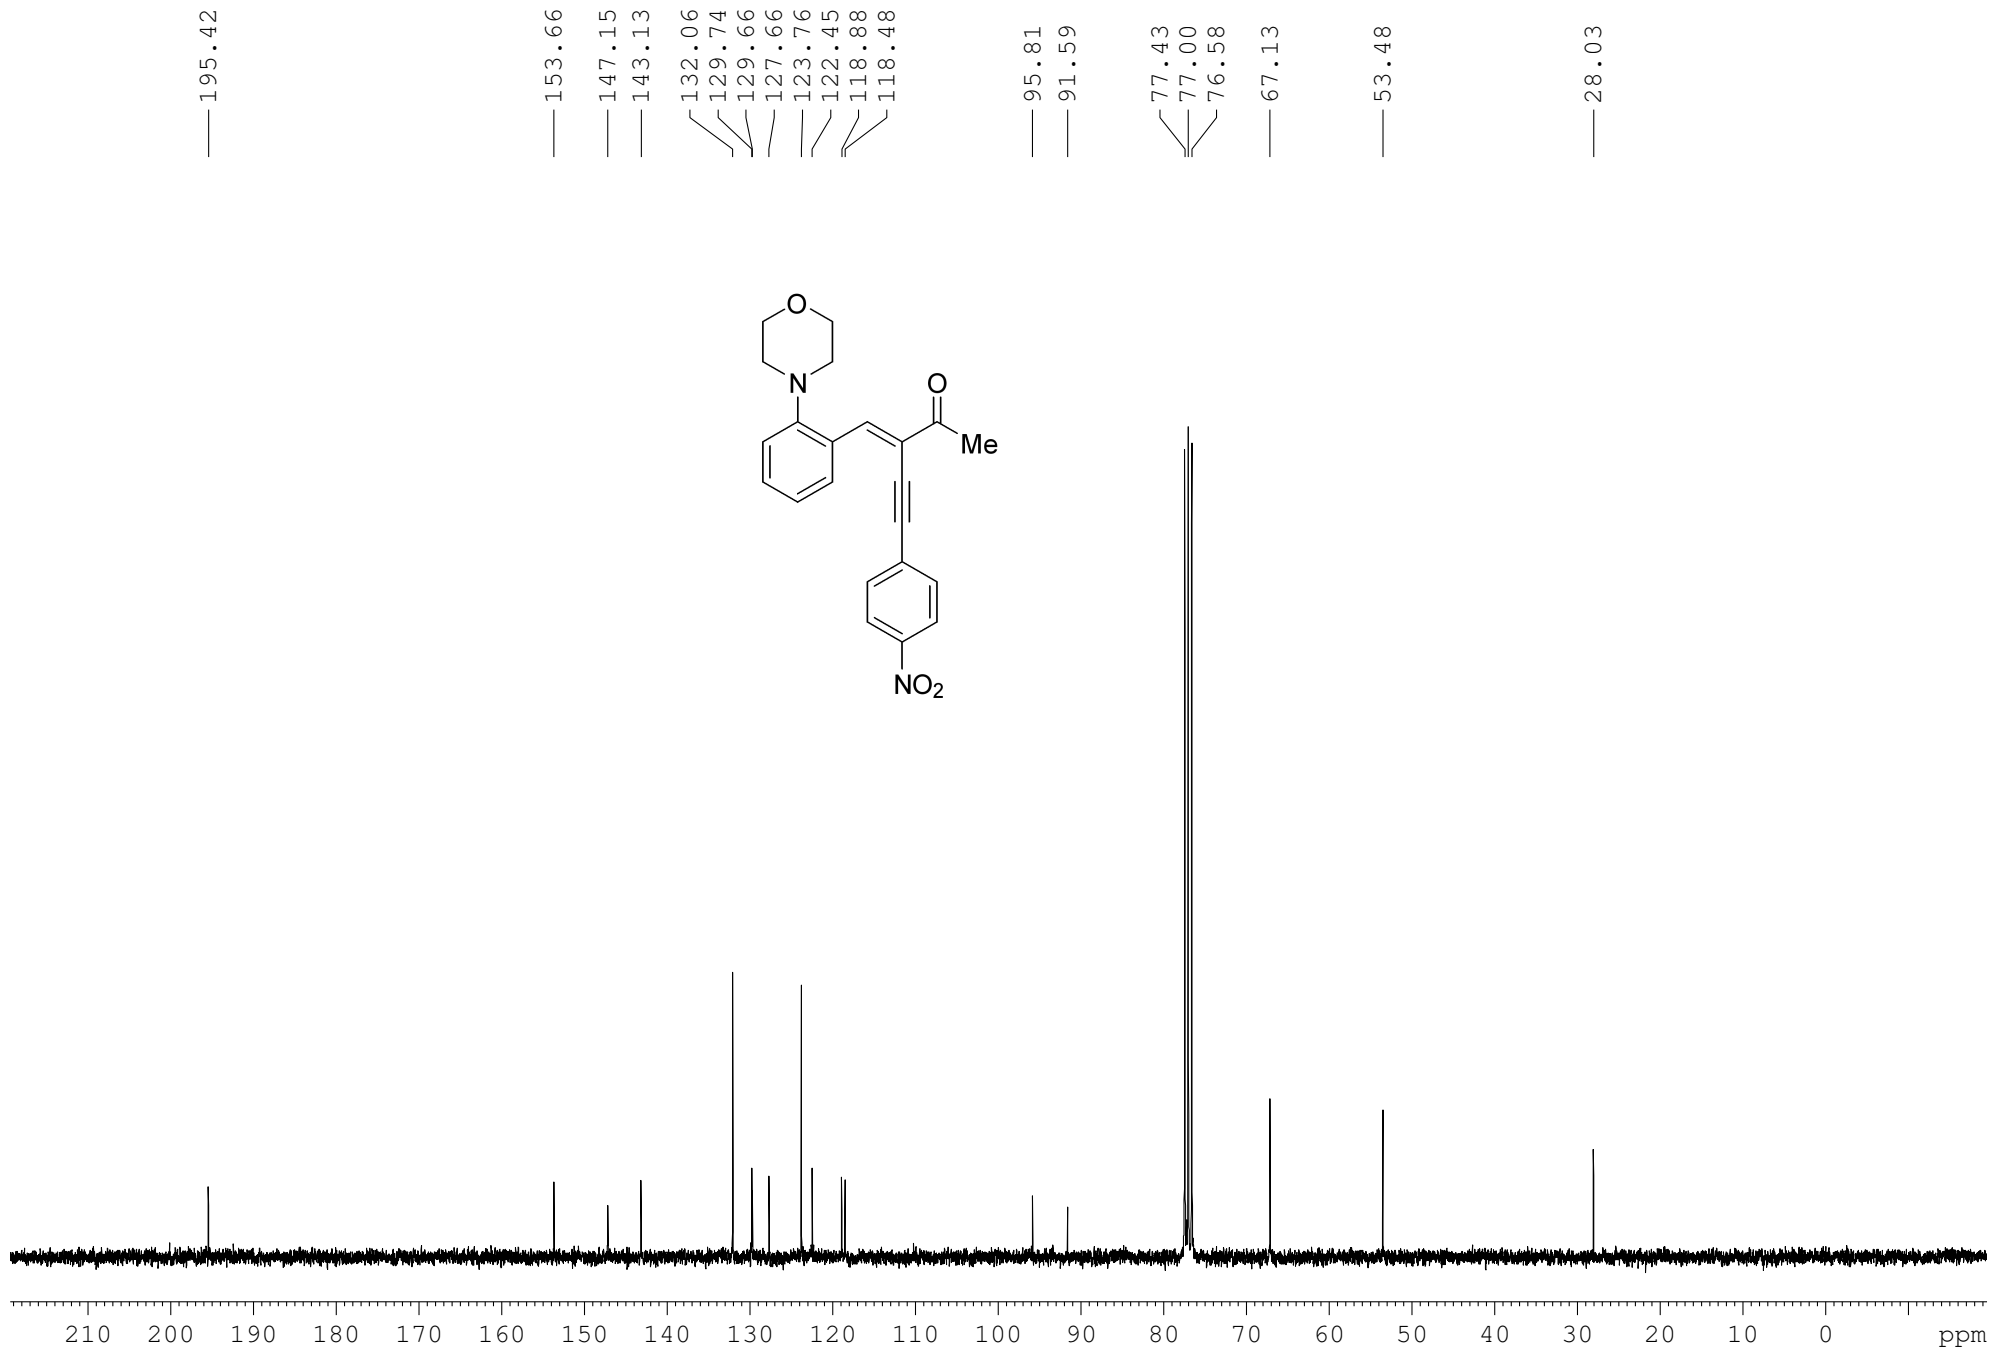

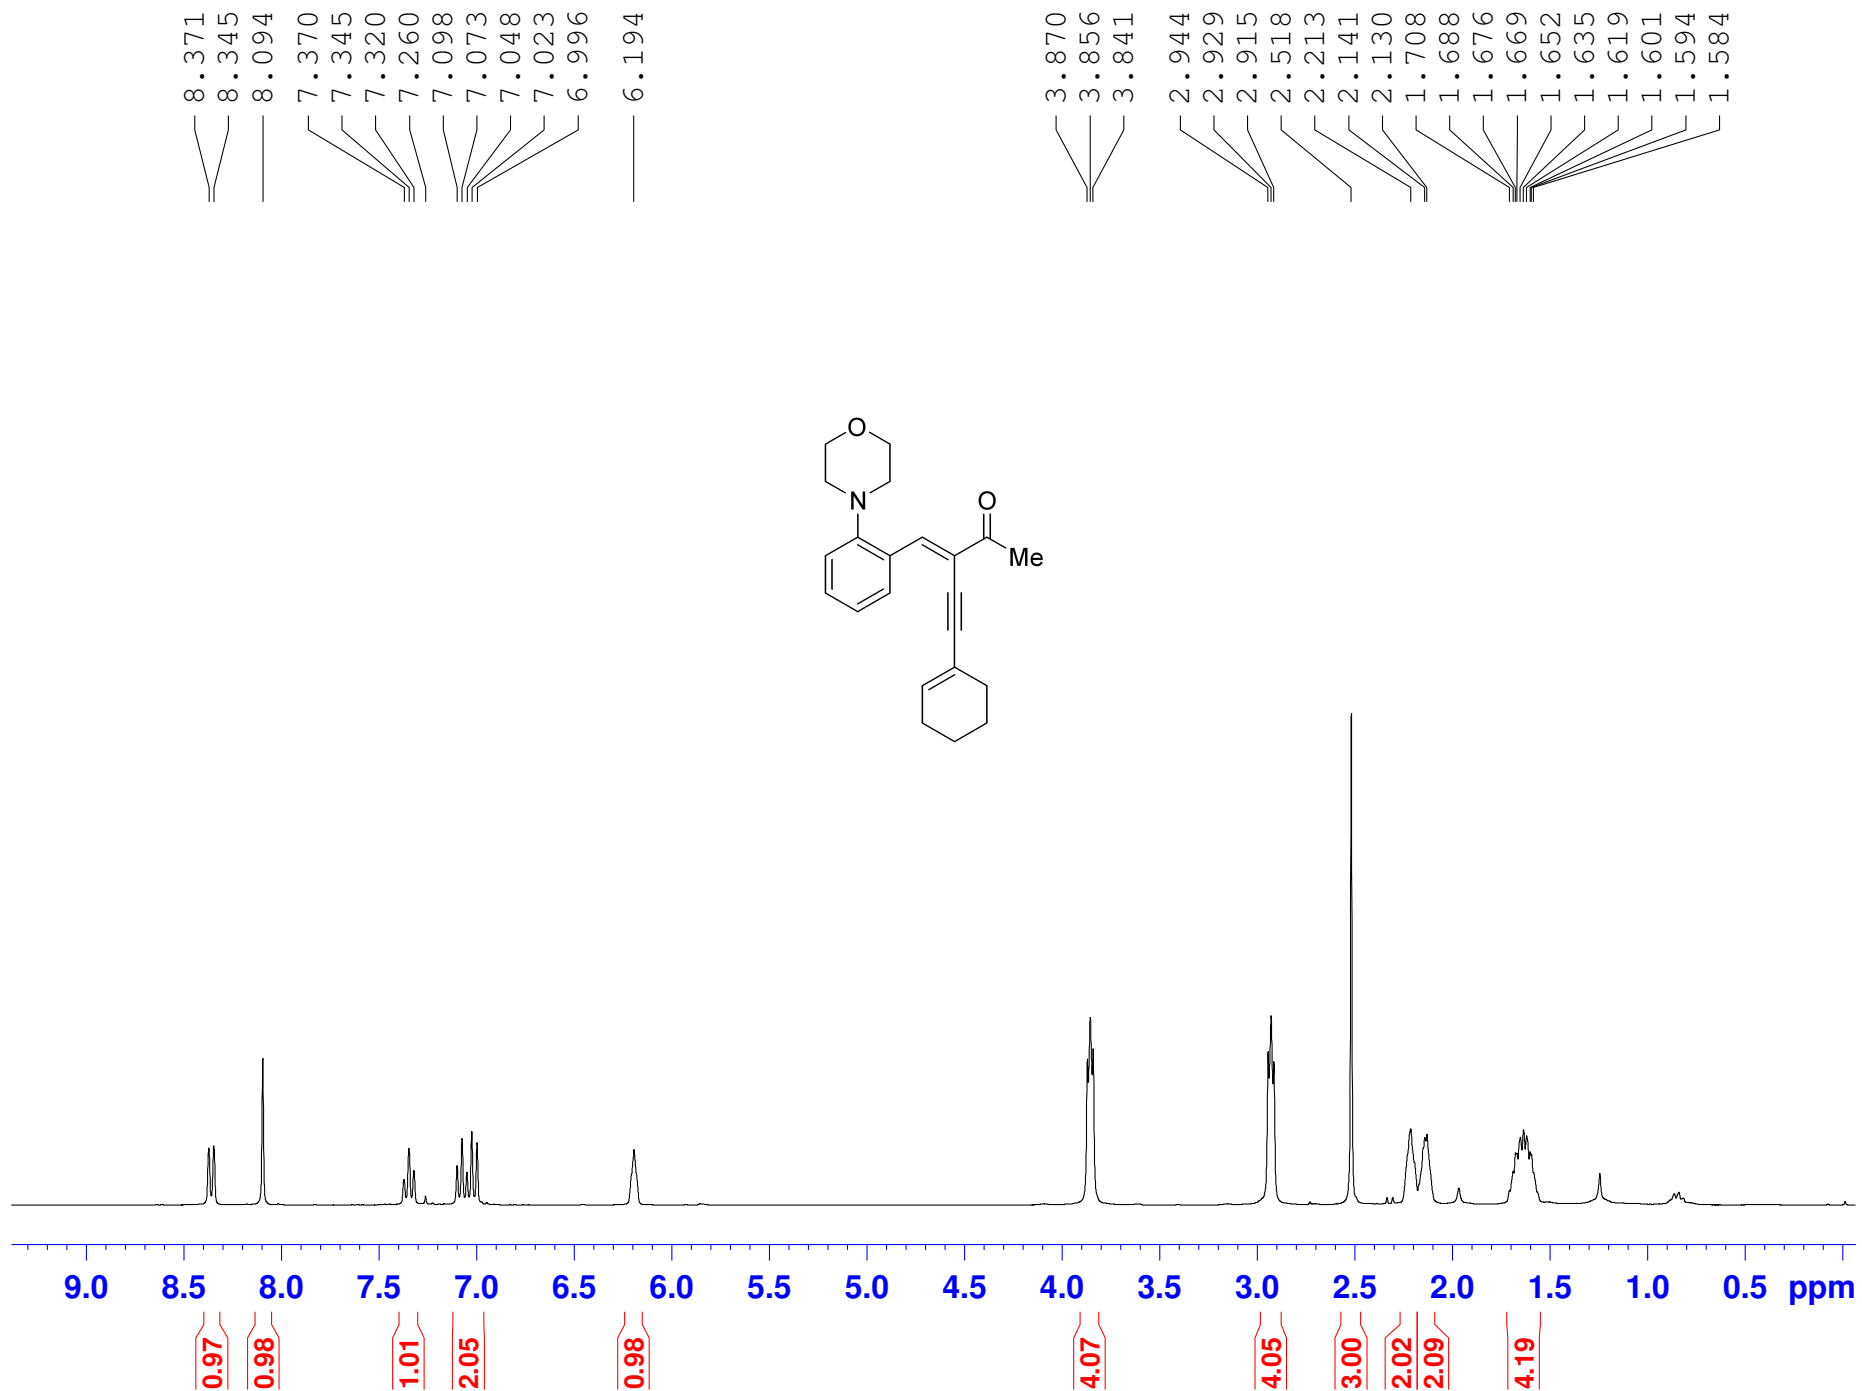



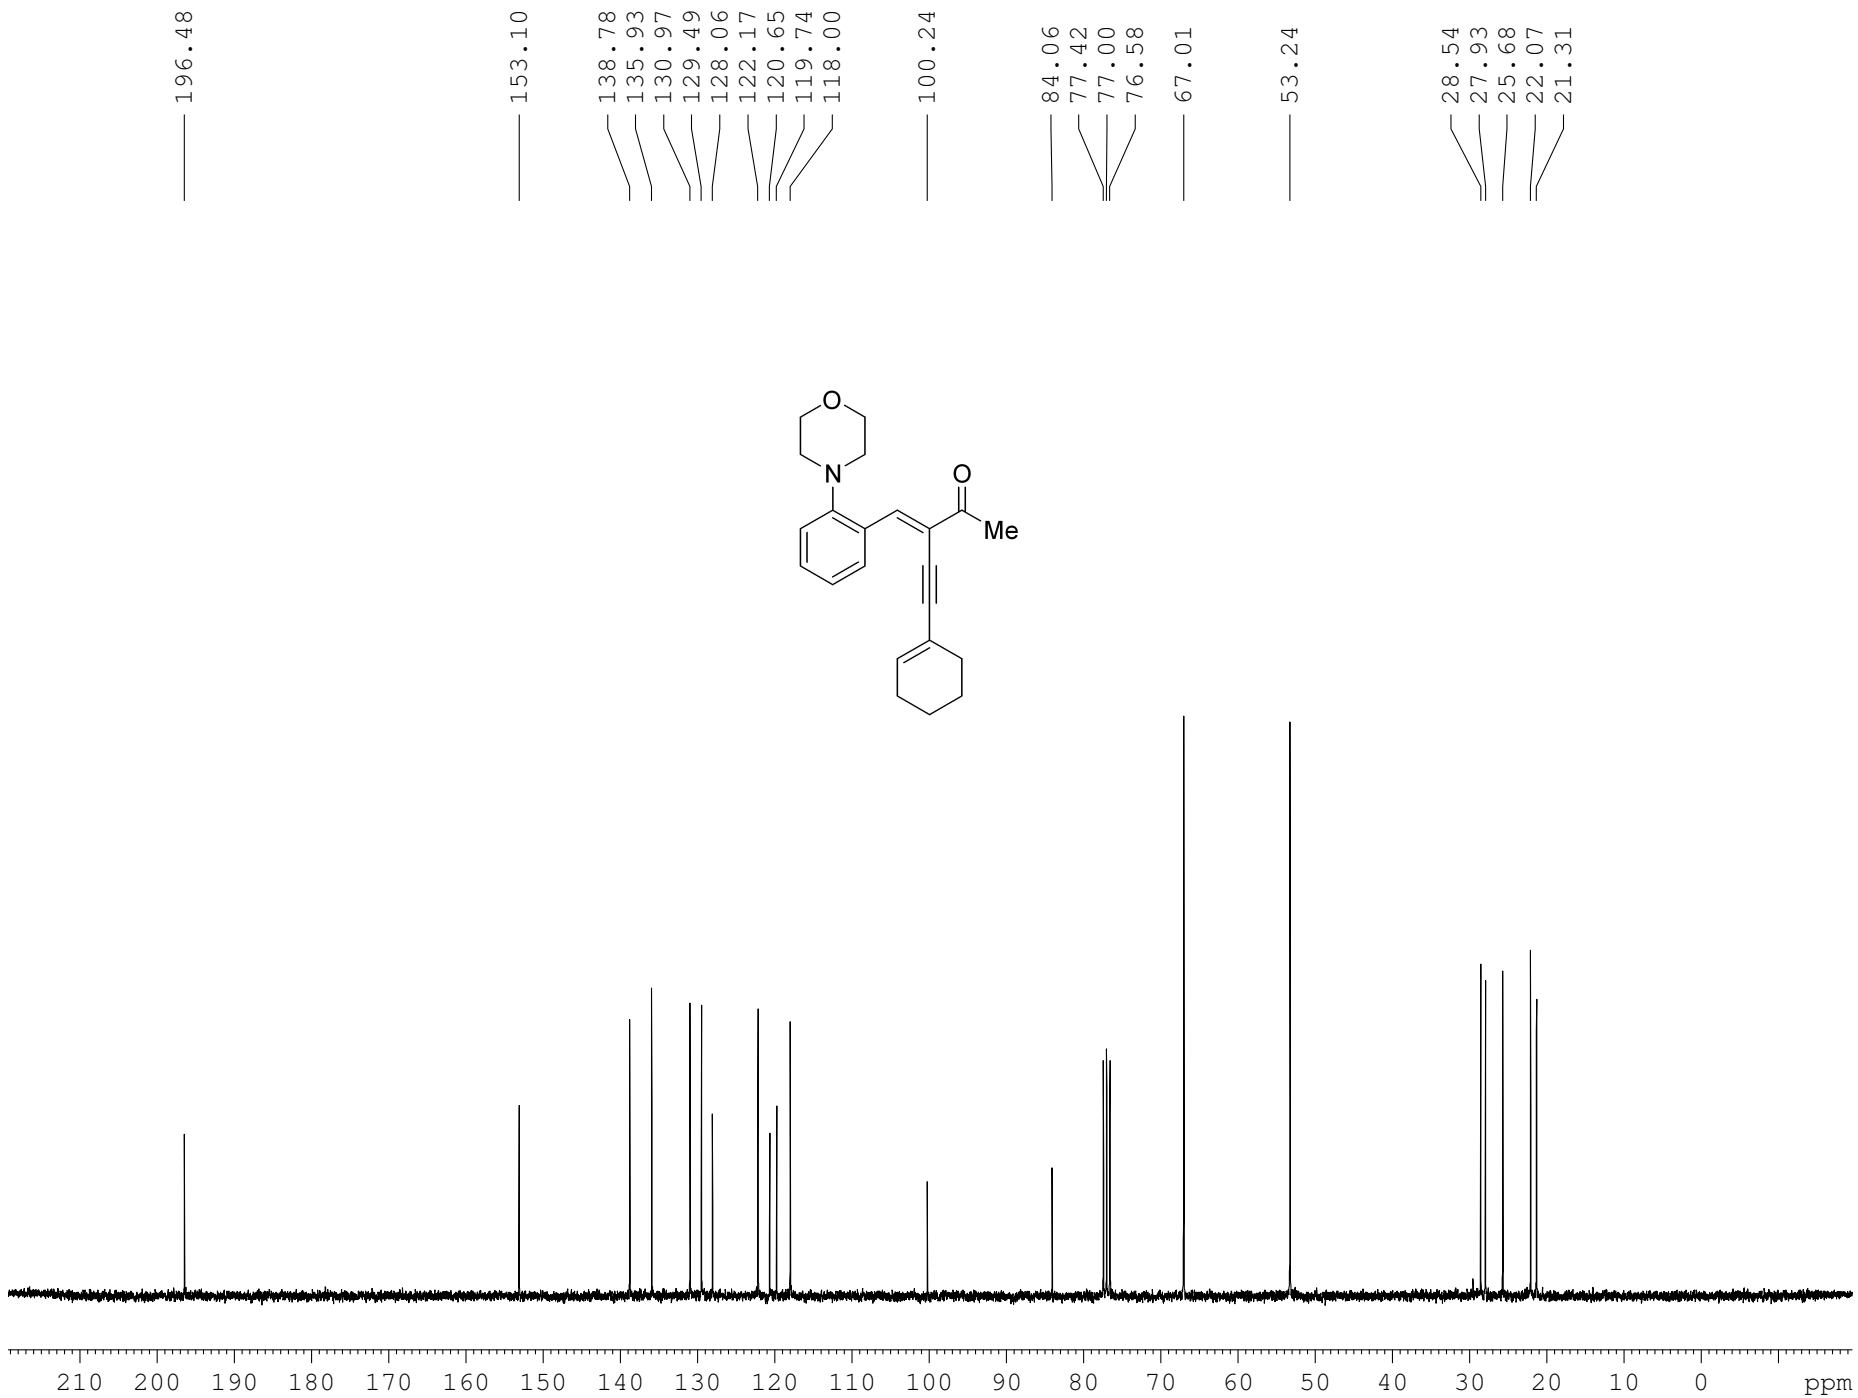

8.380  
8.376  
8.354  
8.350  
8.088  
7.397  
7.392  
7.370  
7.367  
7.346  
7.341  
7.260  
7.101  
7.075  
7.050  
7.023

3.892  
3.877  
3.861  
2.970  
2.954  
2.939  
2.517  
2.506  
2.483  
2.460  
1.638  
1.614  
1.605  
1.588  
1.565  
1.515  
1.491  
1.474  
1.464  
1.440  
0.969  
0.945  
0.921

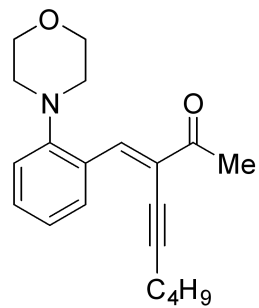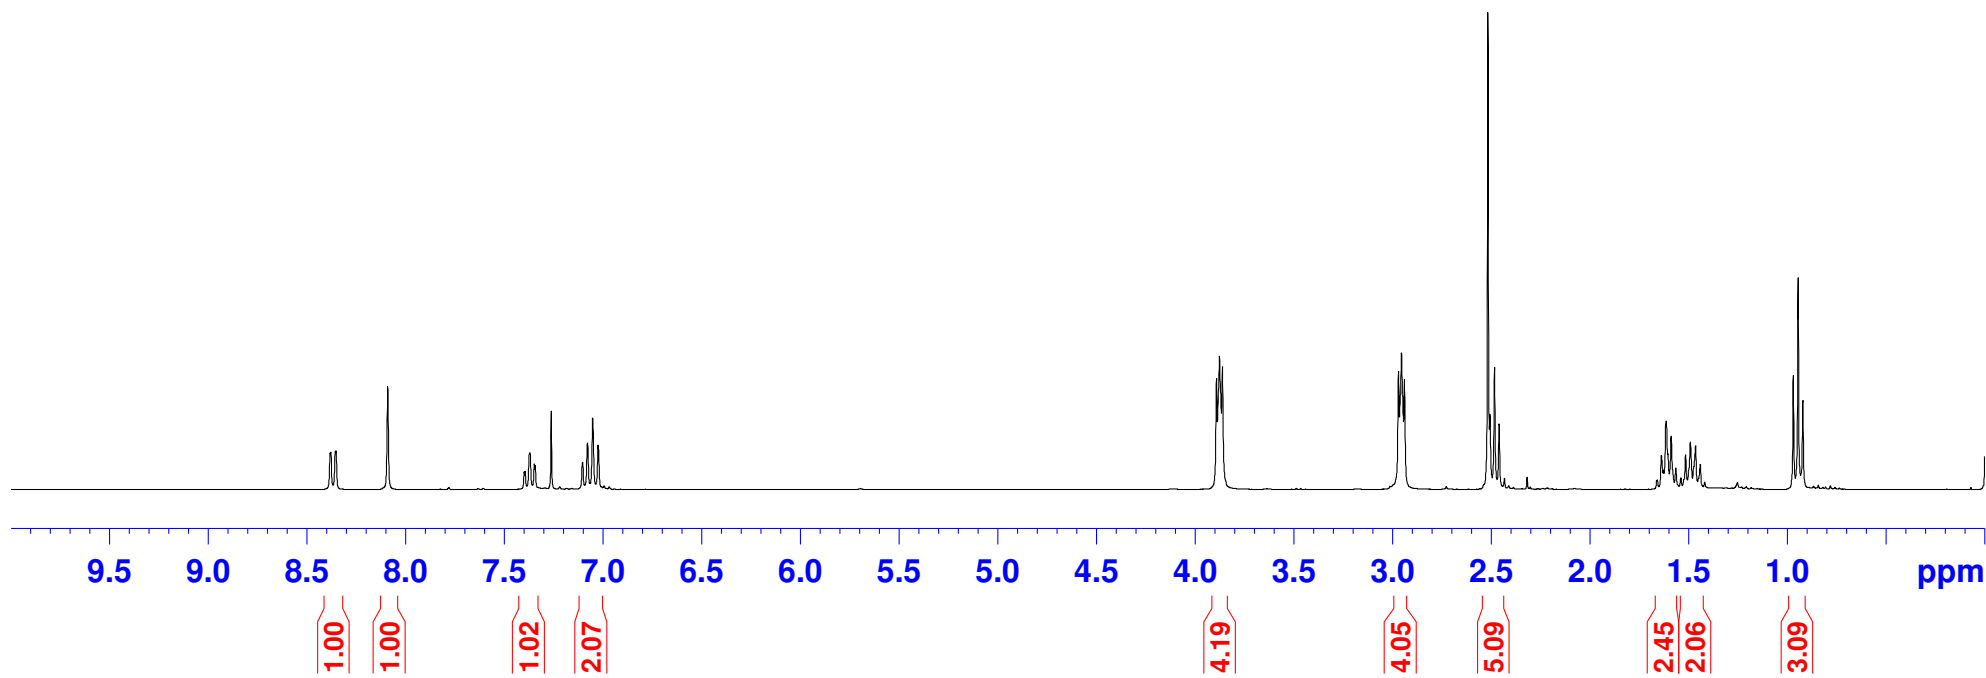

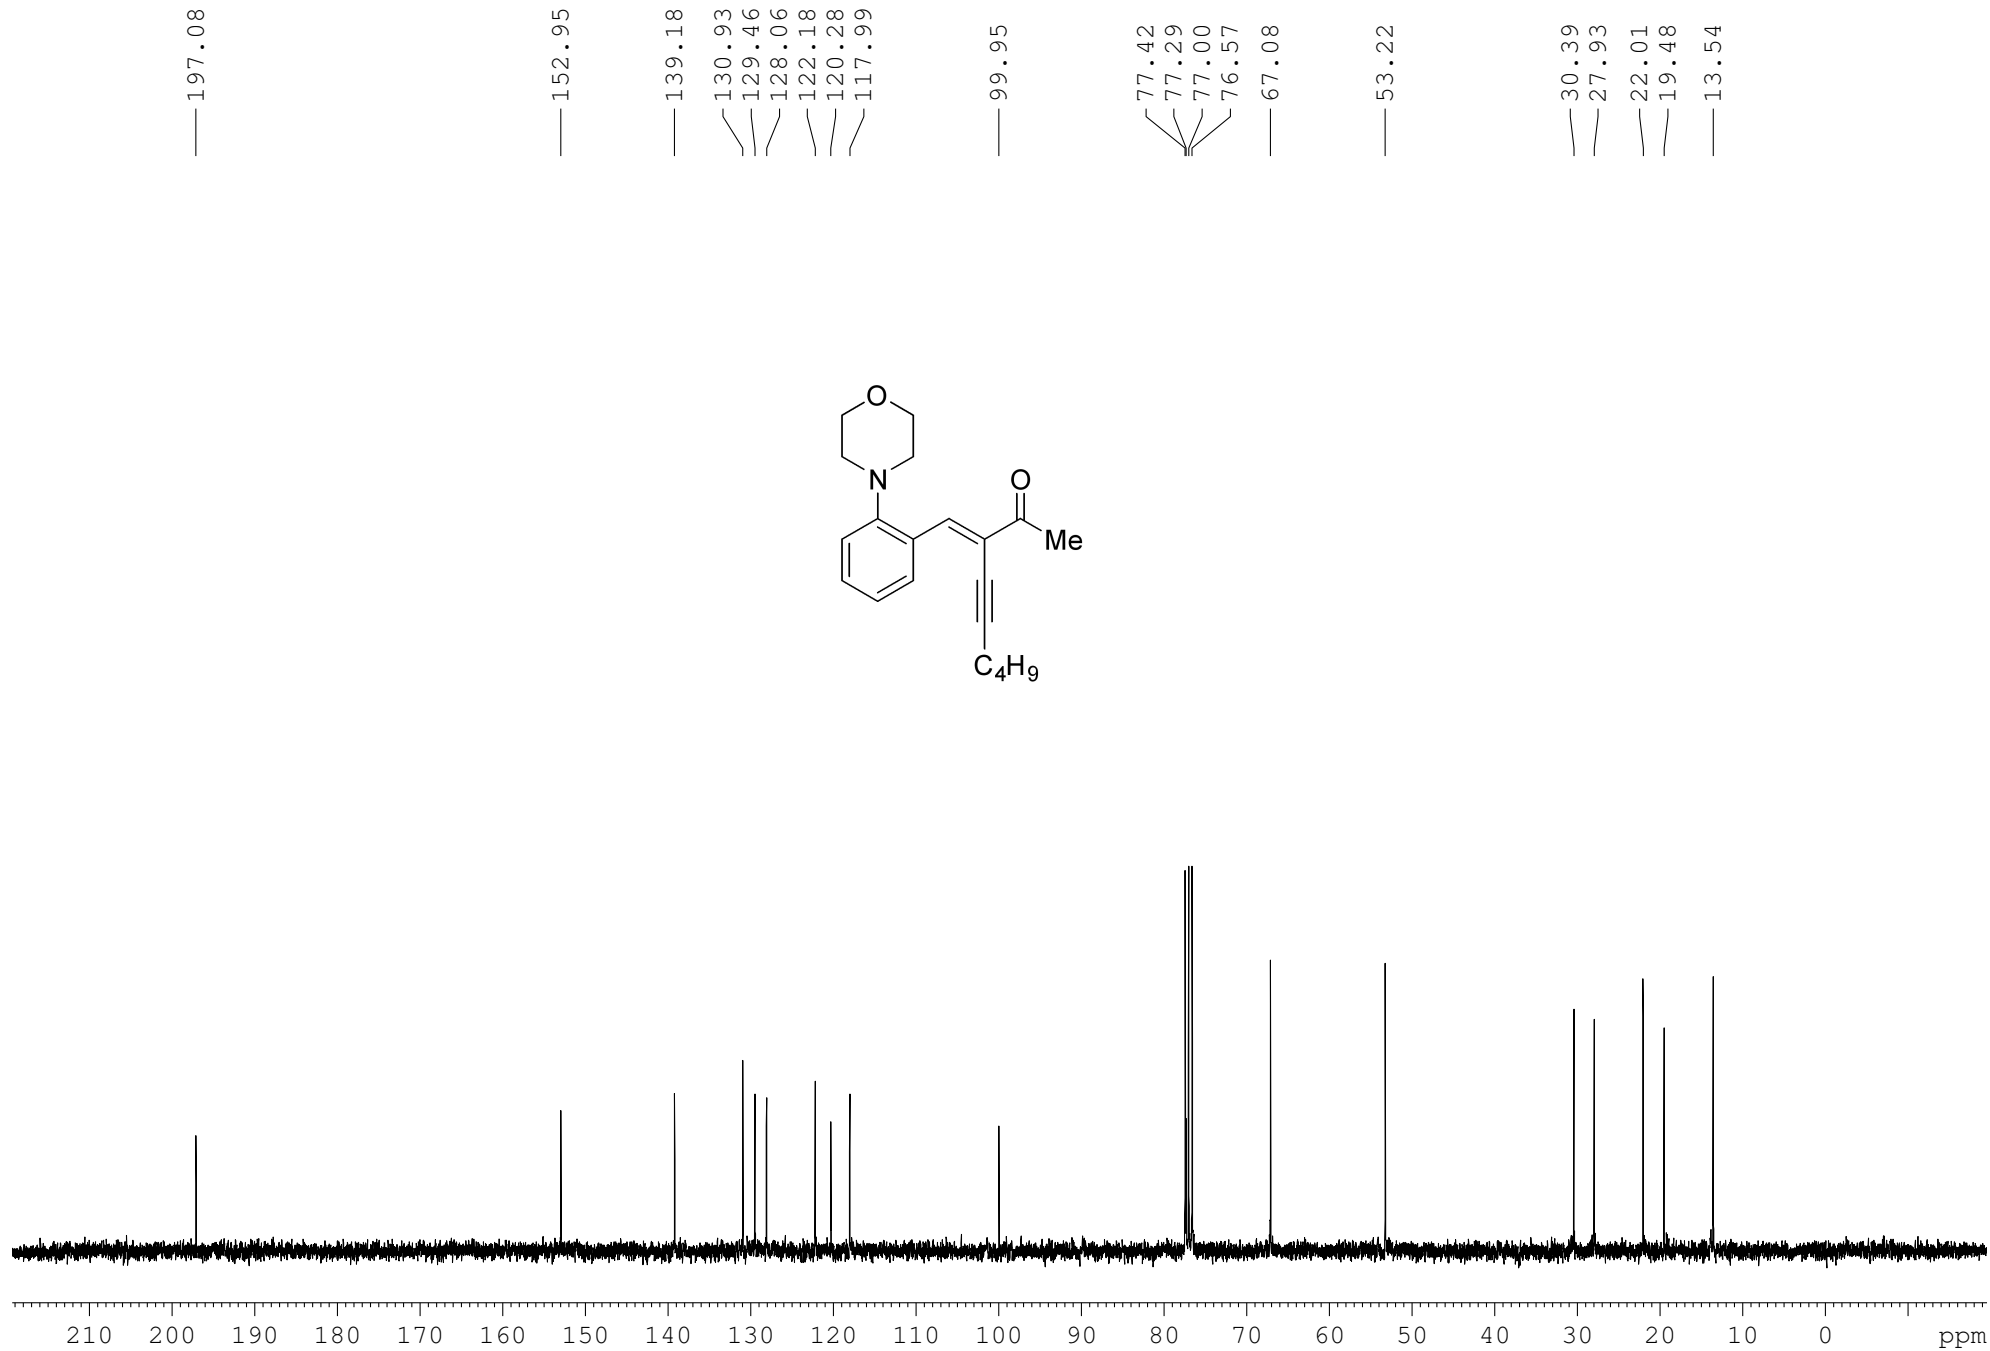

8.453  
8.428  
8.214  
7.527  
7.514  
7.502  
7.495  
7.402  
7.397  
7.375  
7.368  
7.360  
7.354  
7.346  
7.260  
7.096  
7.065  
7.044  
7.038

2.956  
2.939  
2.921  
2.626  
1.789  
1.772  
1.755  
1.736  
1.632  
1.613  
1.606  
1.597

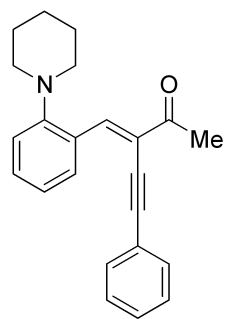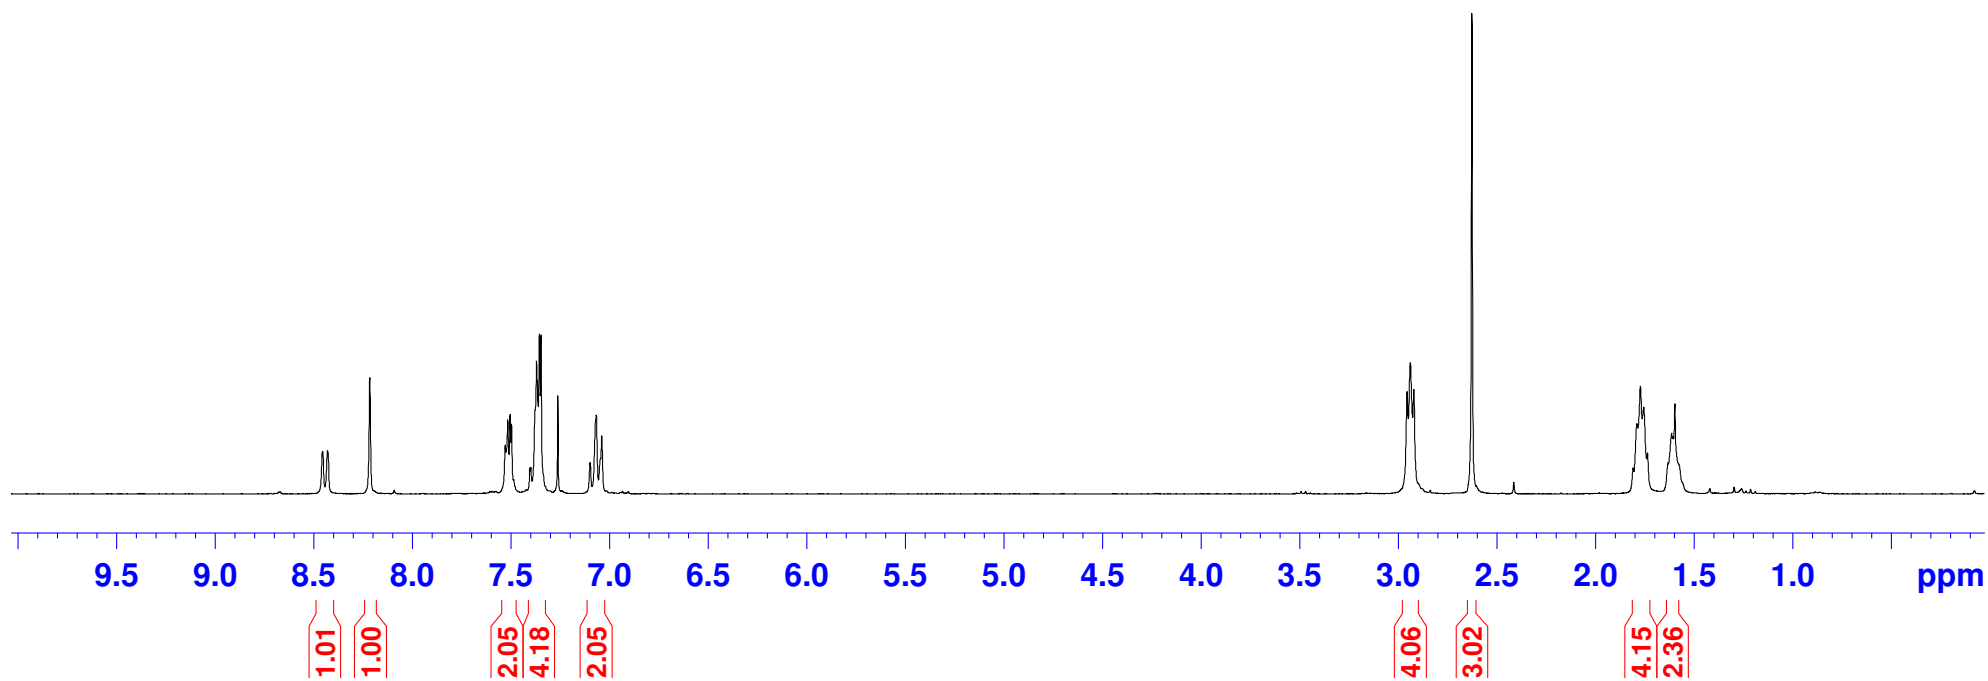

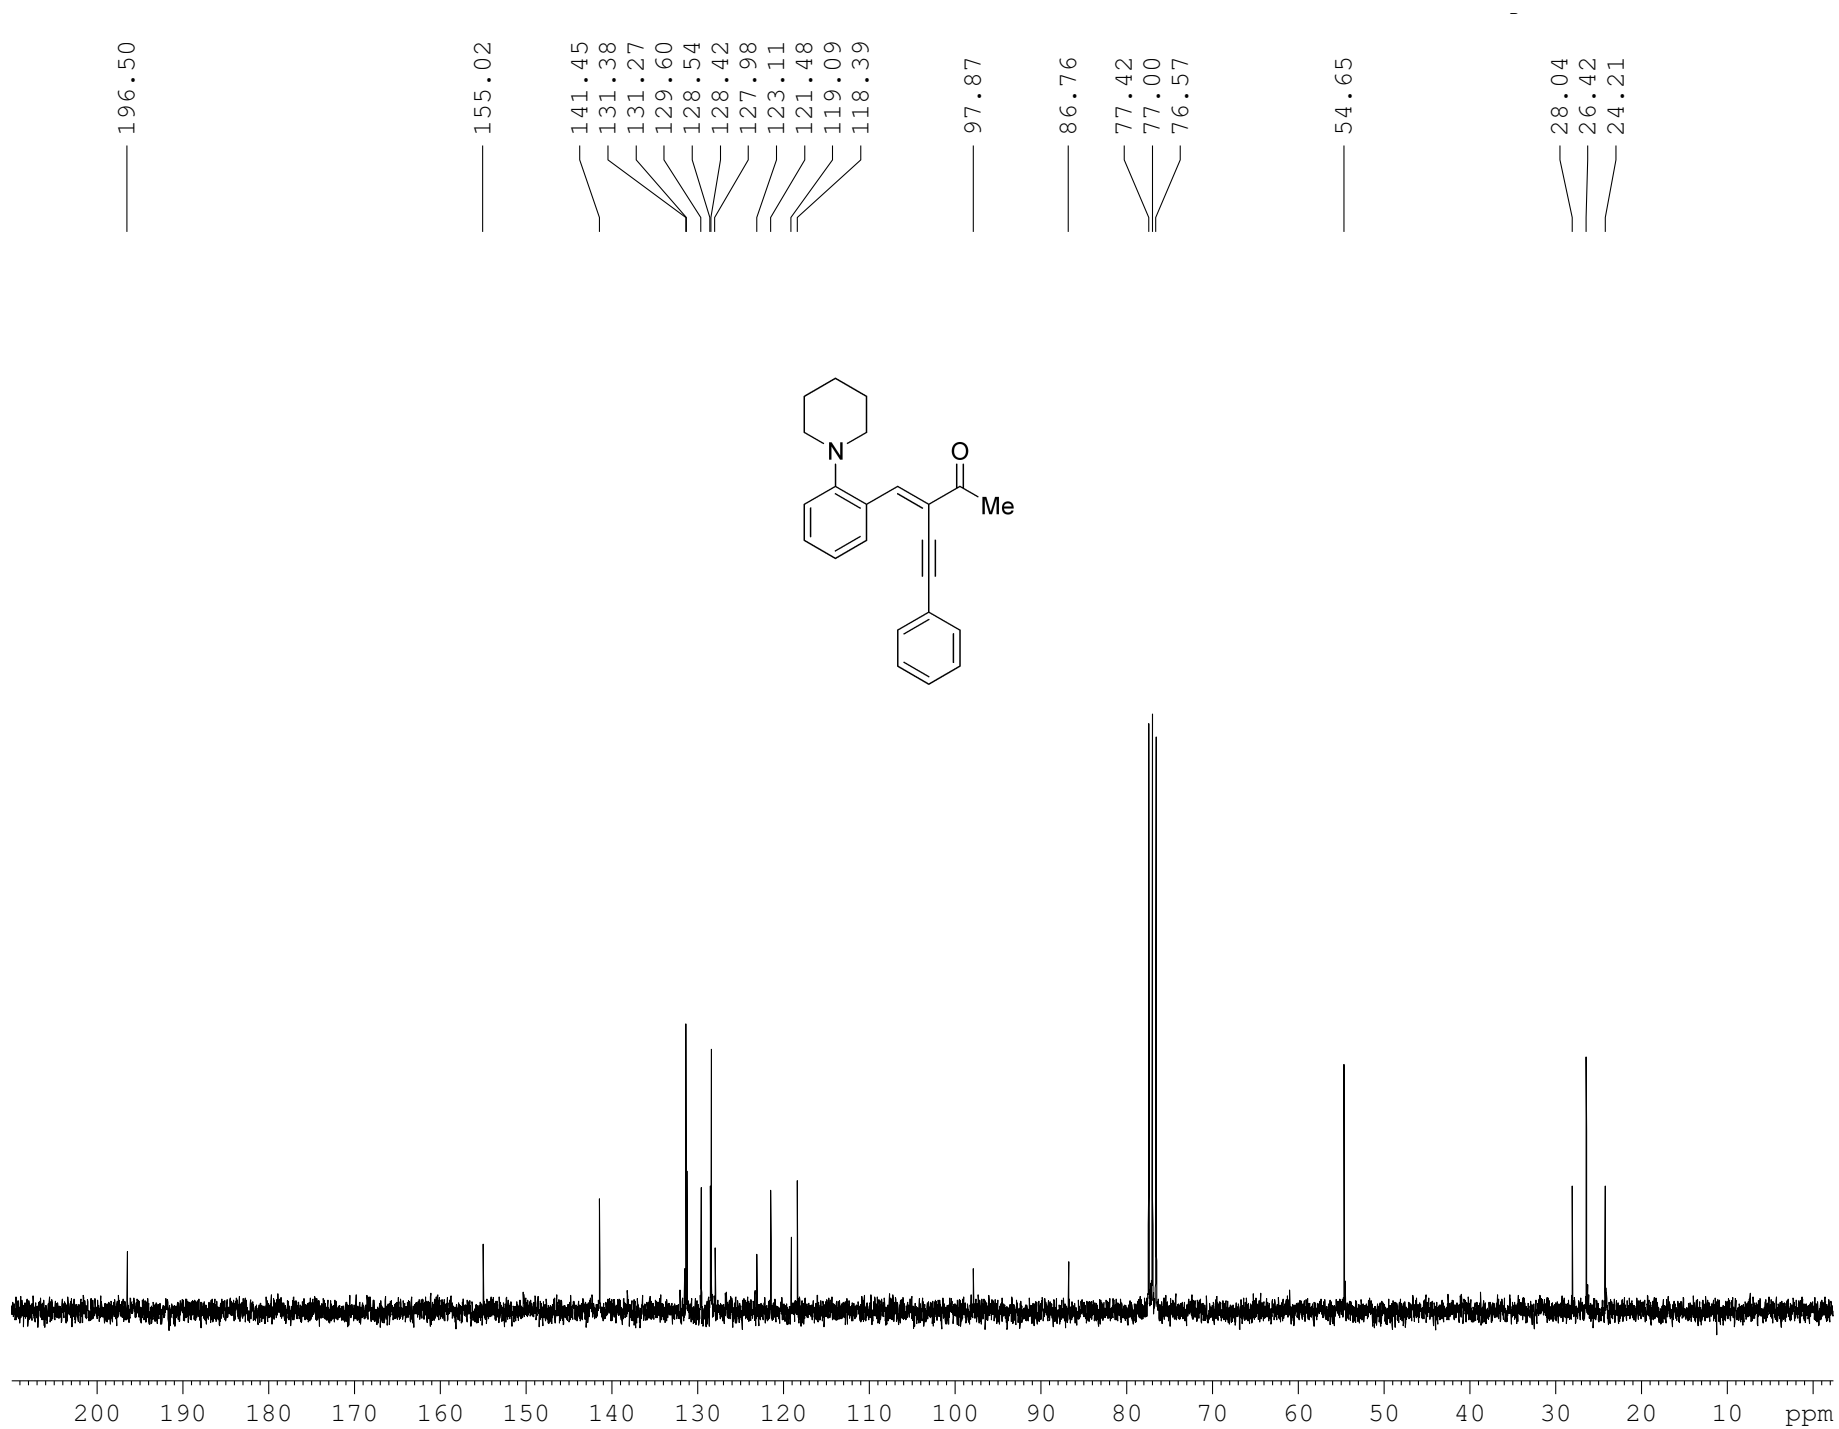

8.463  
8.437  
8.194  
7.418  
7.391  
7.363  
7.338  
7.260  
7.179  
7.152  
7.088  
7.061  
7.033

2.954  
2.938  
2.921  
2.620  
2.376  
1.789  
1.772  
1.756  
1.738  
1.616  
1.597

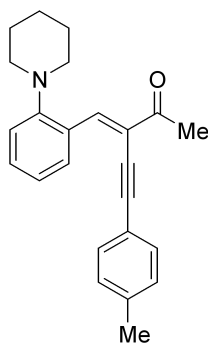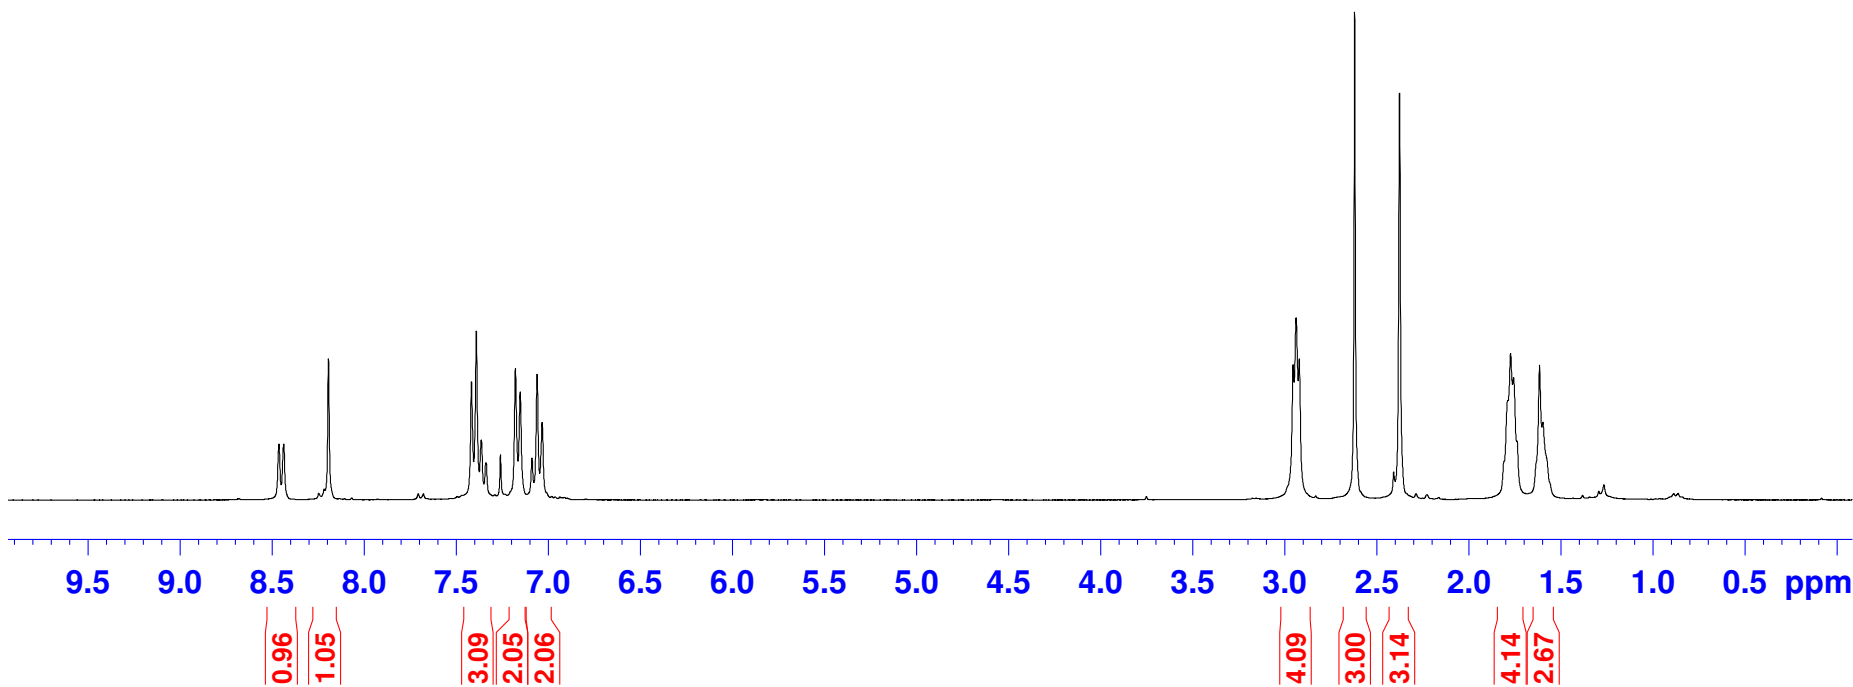

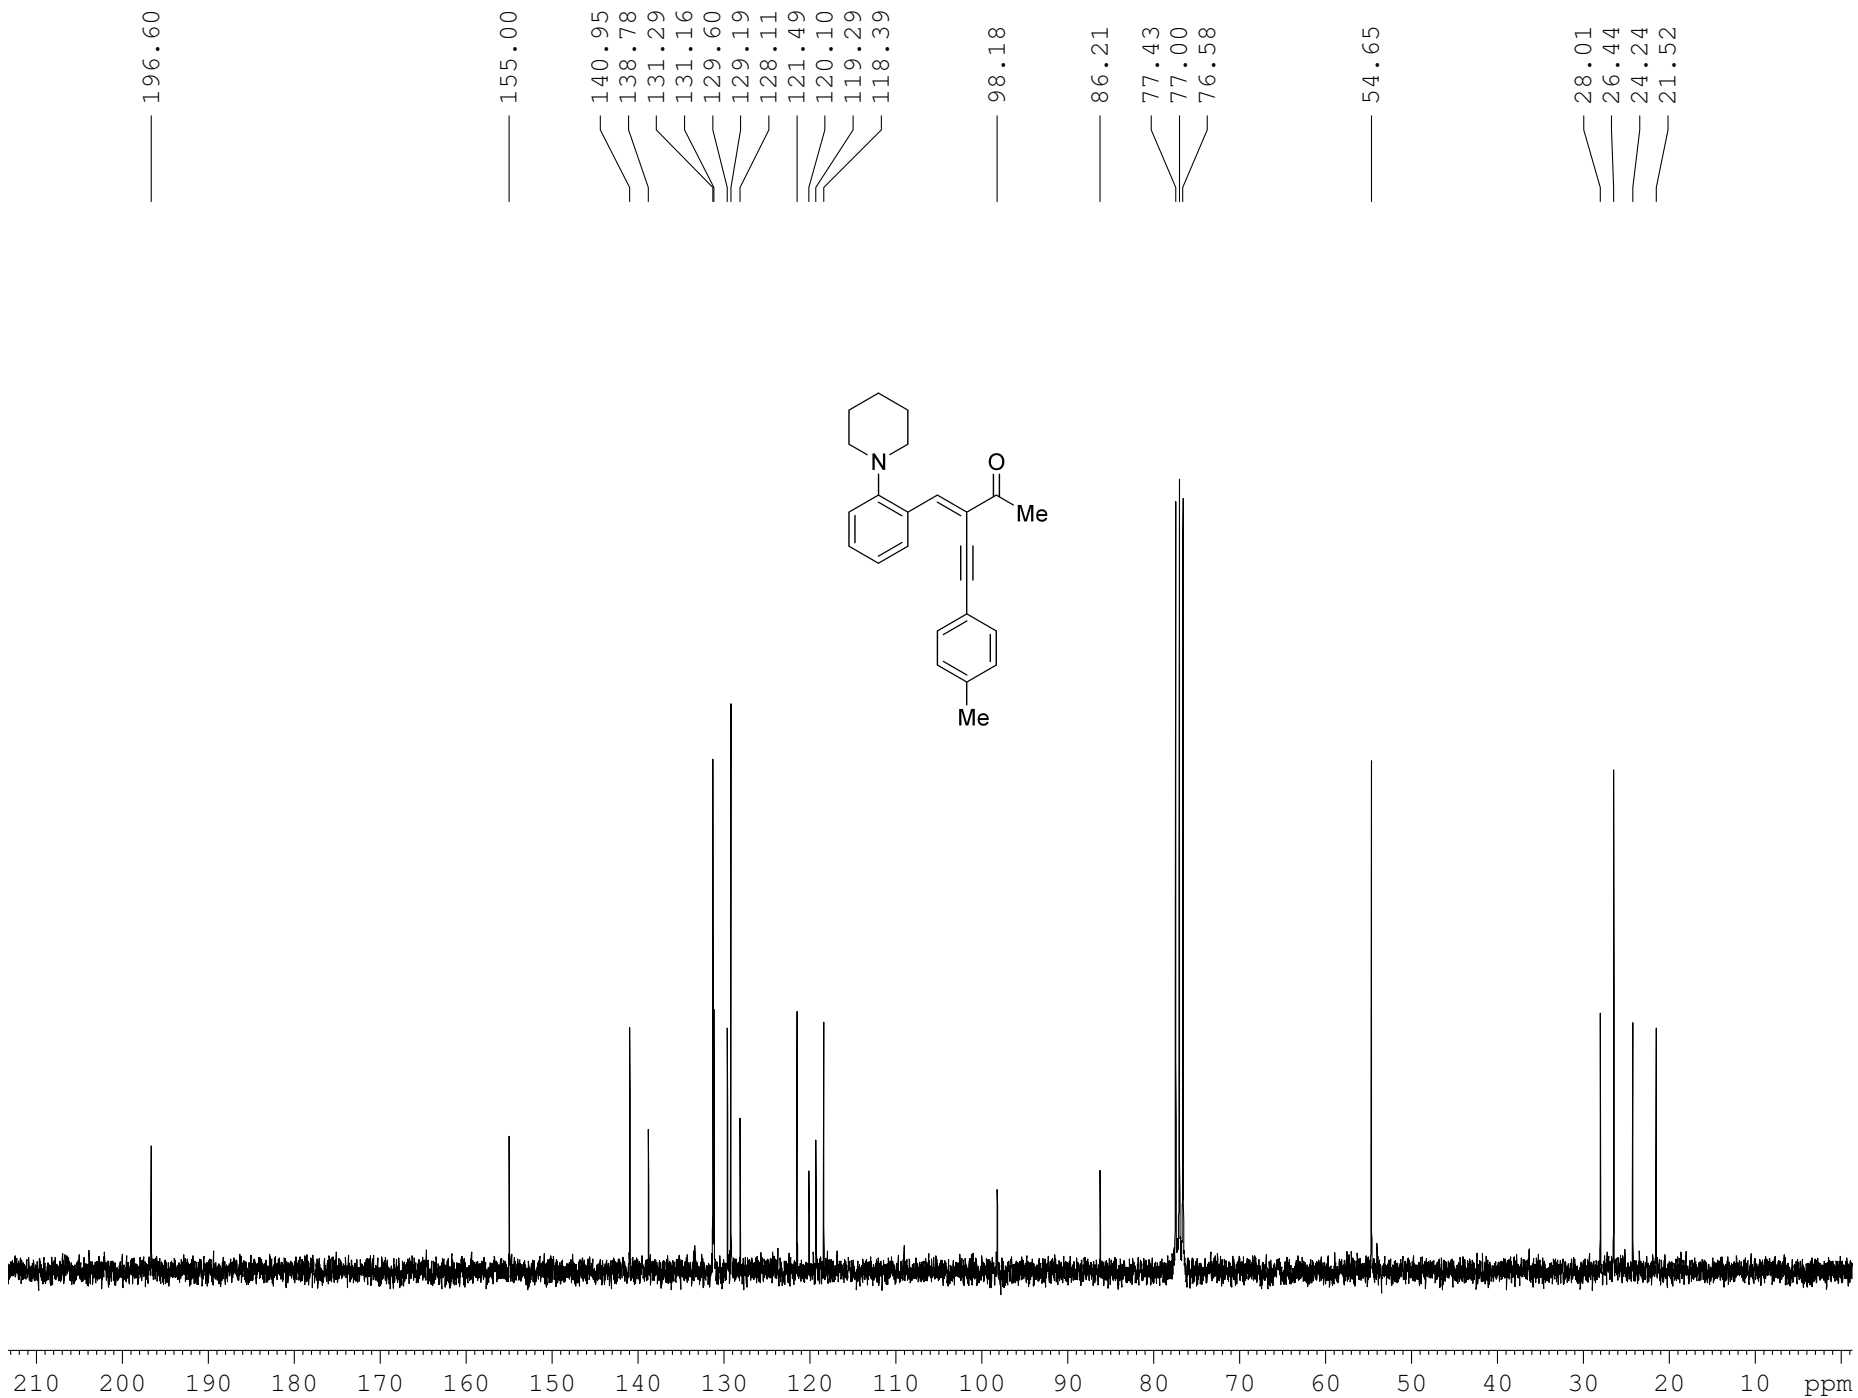

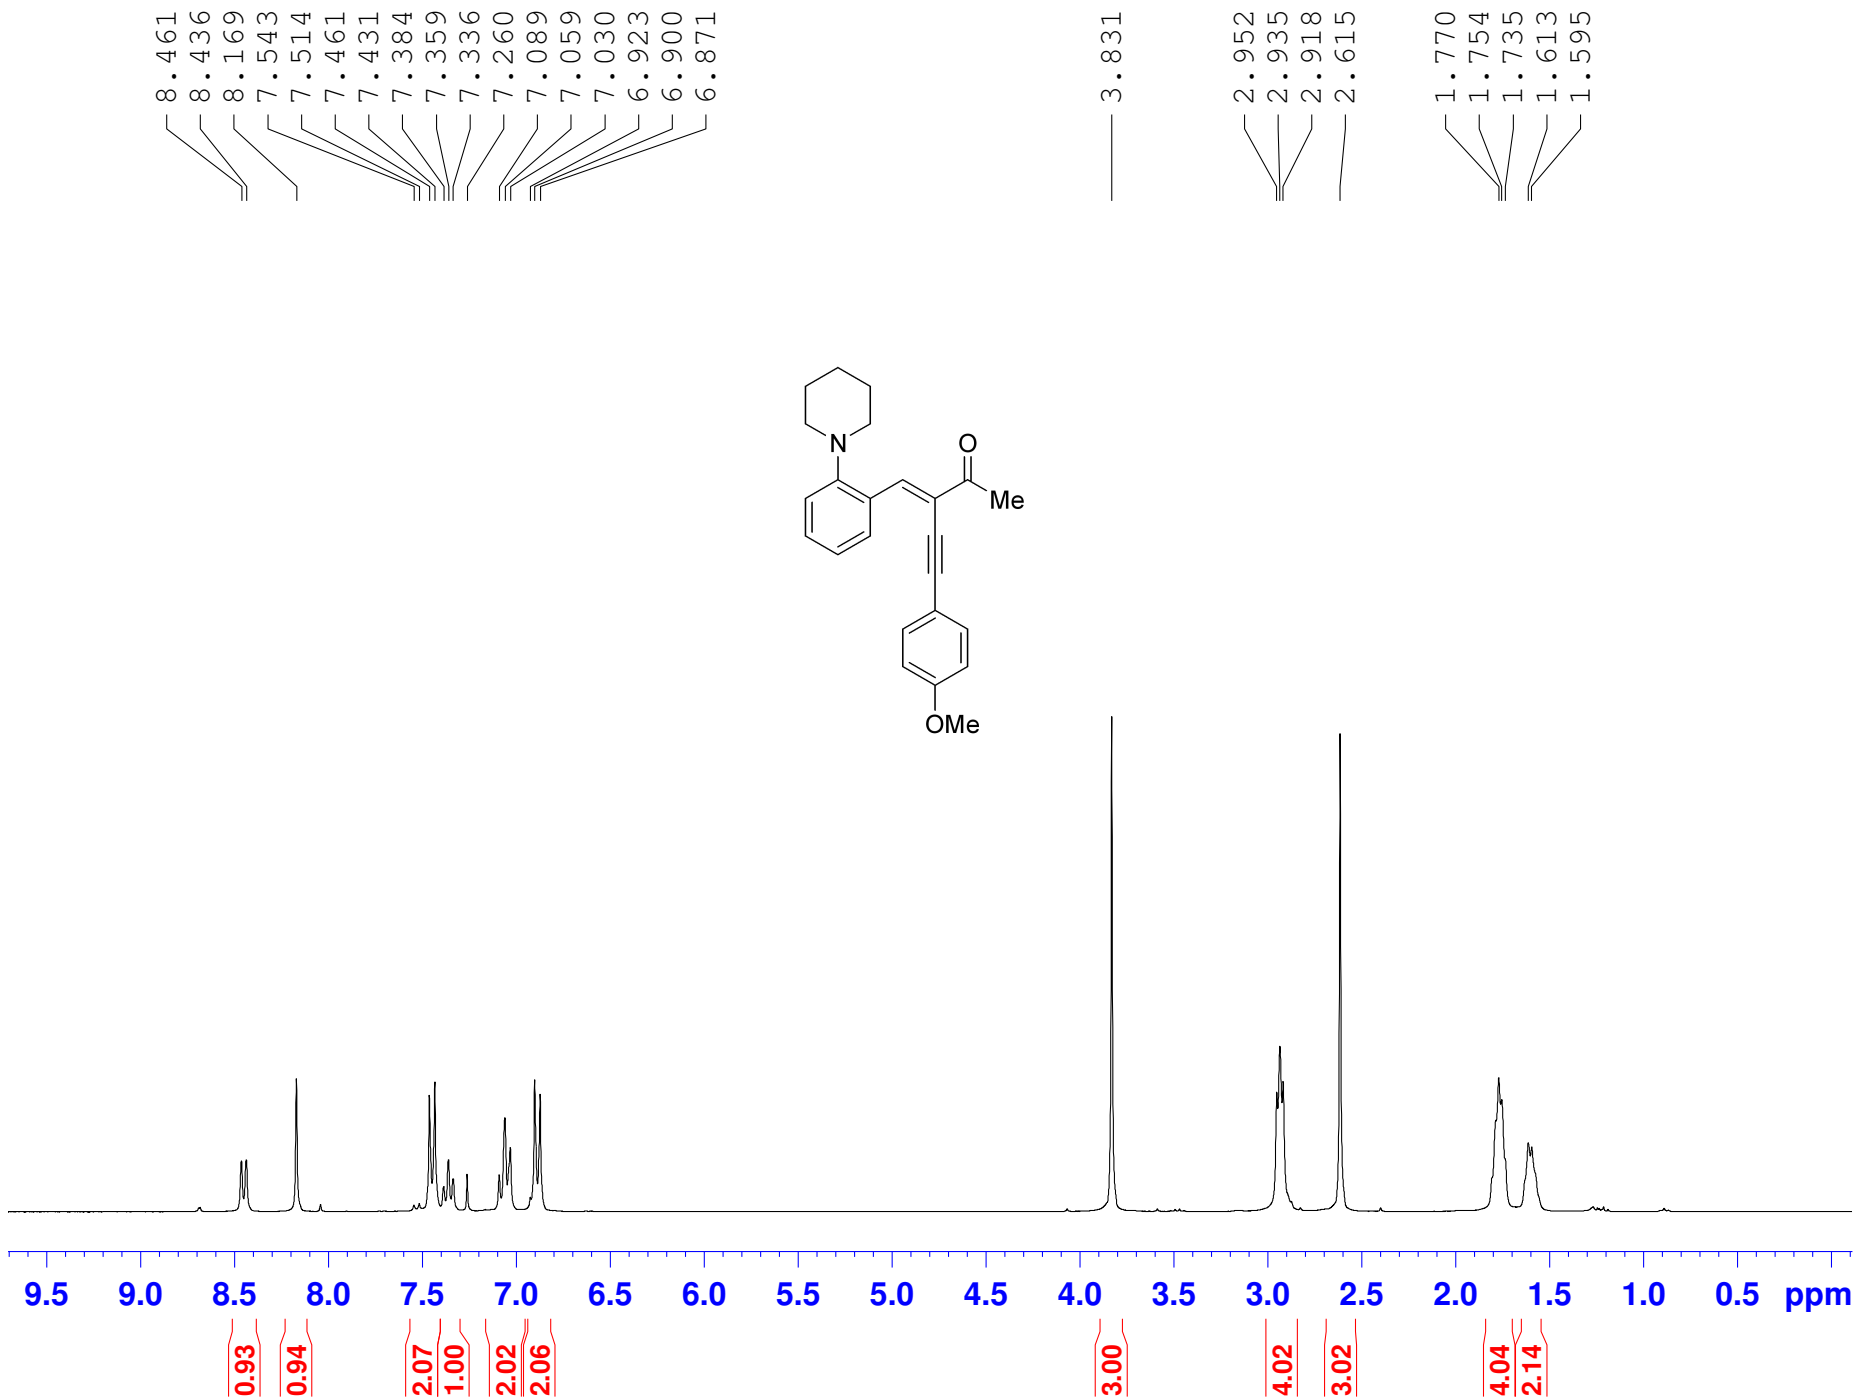



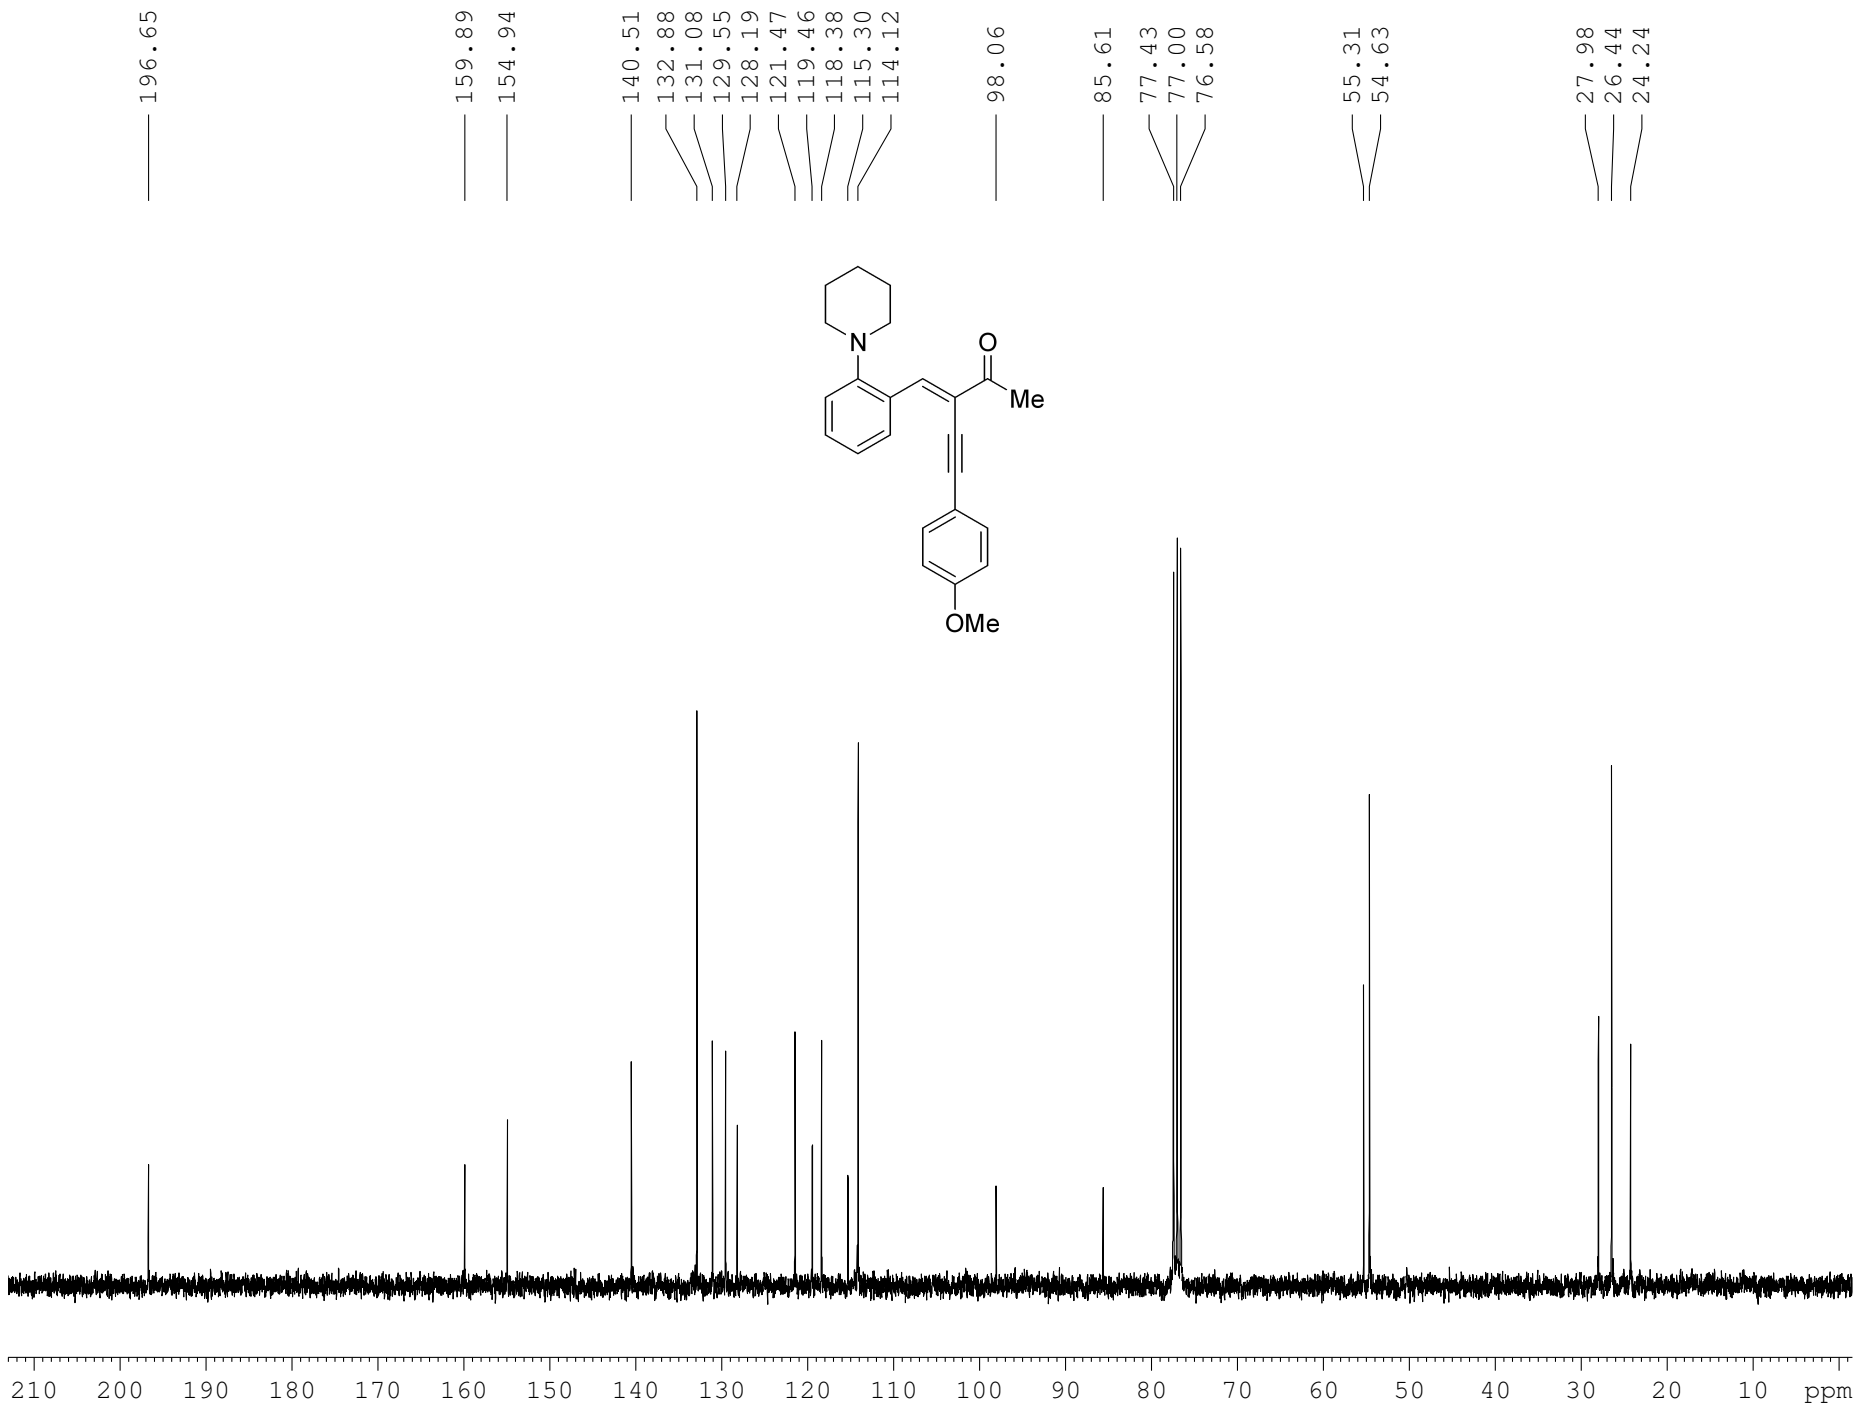

8.328  
8.304  
8.068  
7.354  
7.331  
7.306  
7.260  
7.044  
7.023  
6.997

2.909  
2.893  
2.875  
2.503  
1.775  
1.755  
1.739  
1.722  
1.704  
1.610  
1.590  
1.573  
1.545  
1.534  
1.516  
1.500  
1.489  
1.472  
0.930  
0.905  
0.894  
0.886

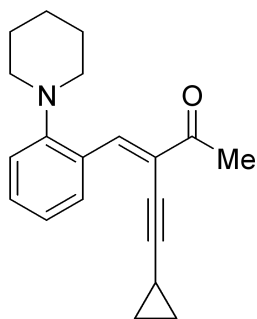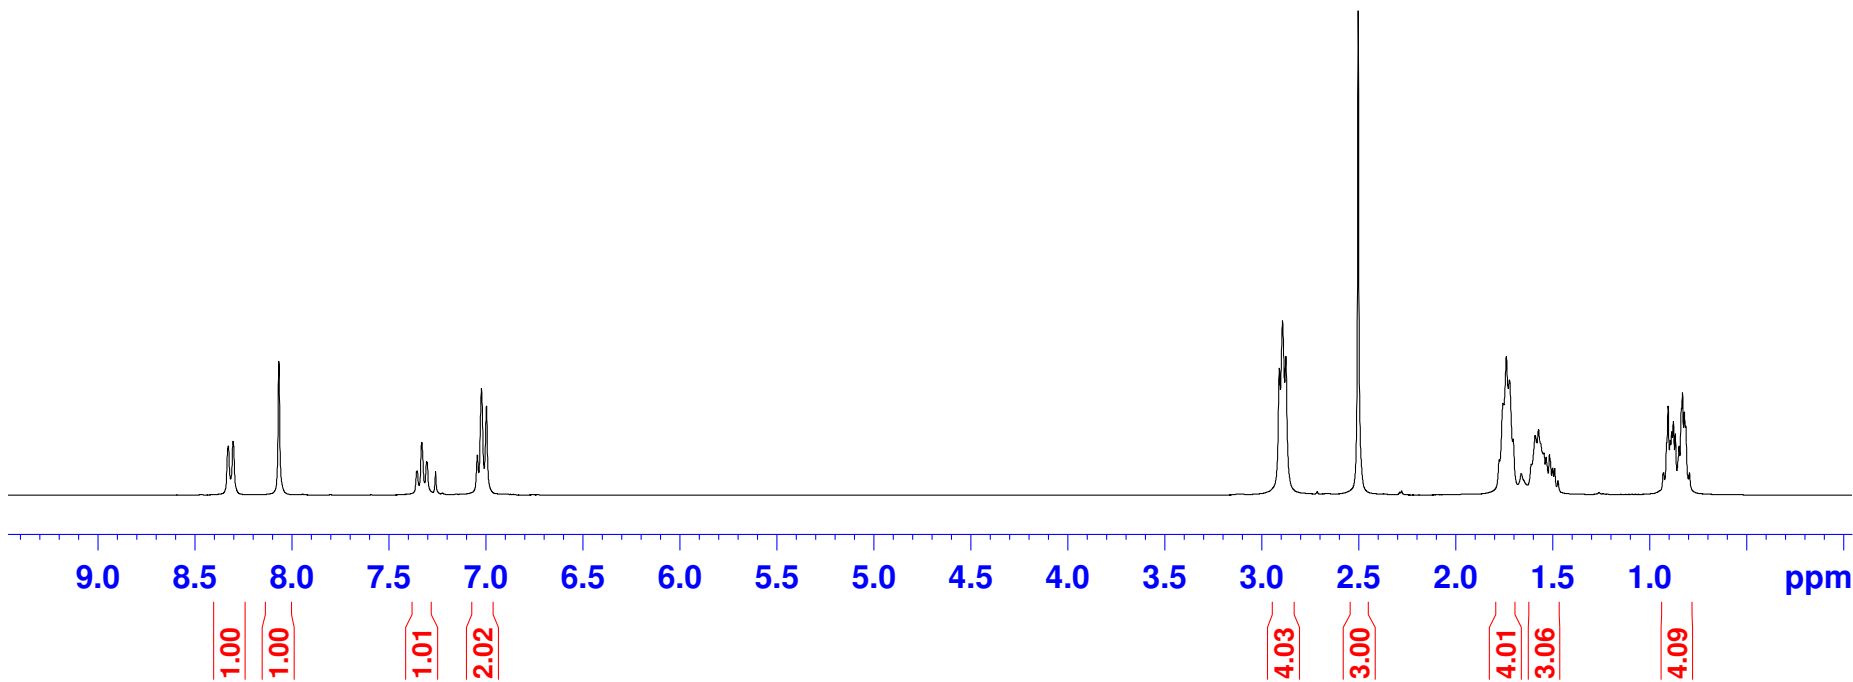

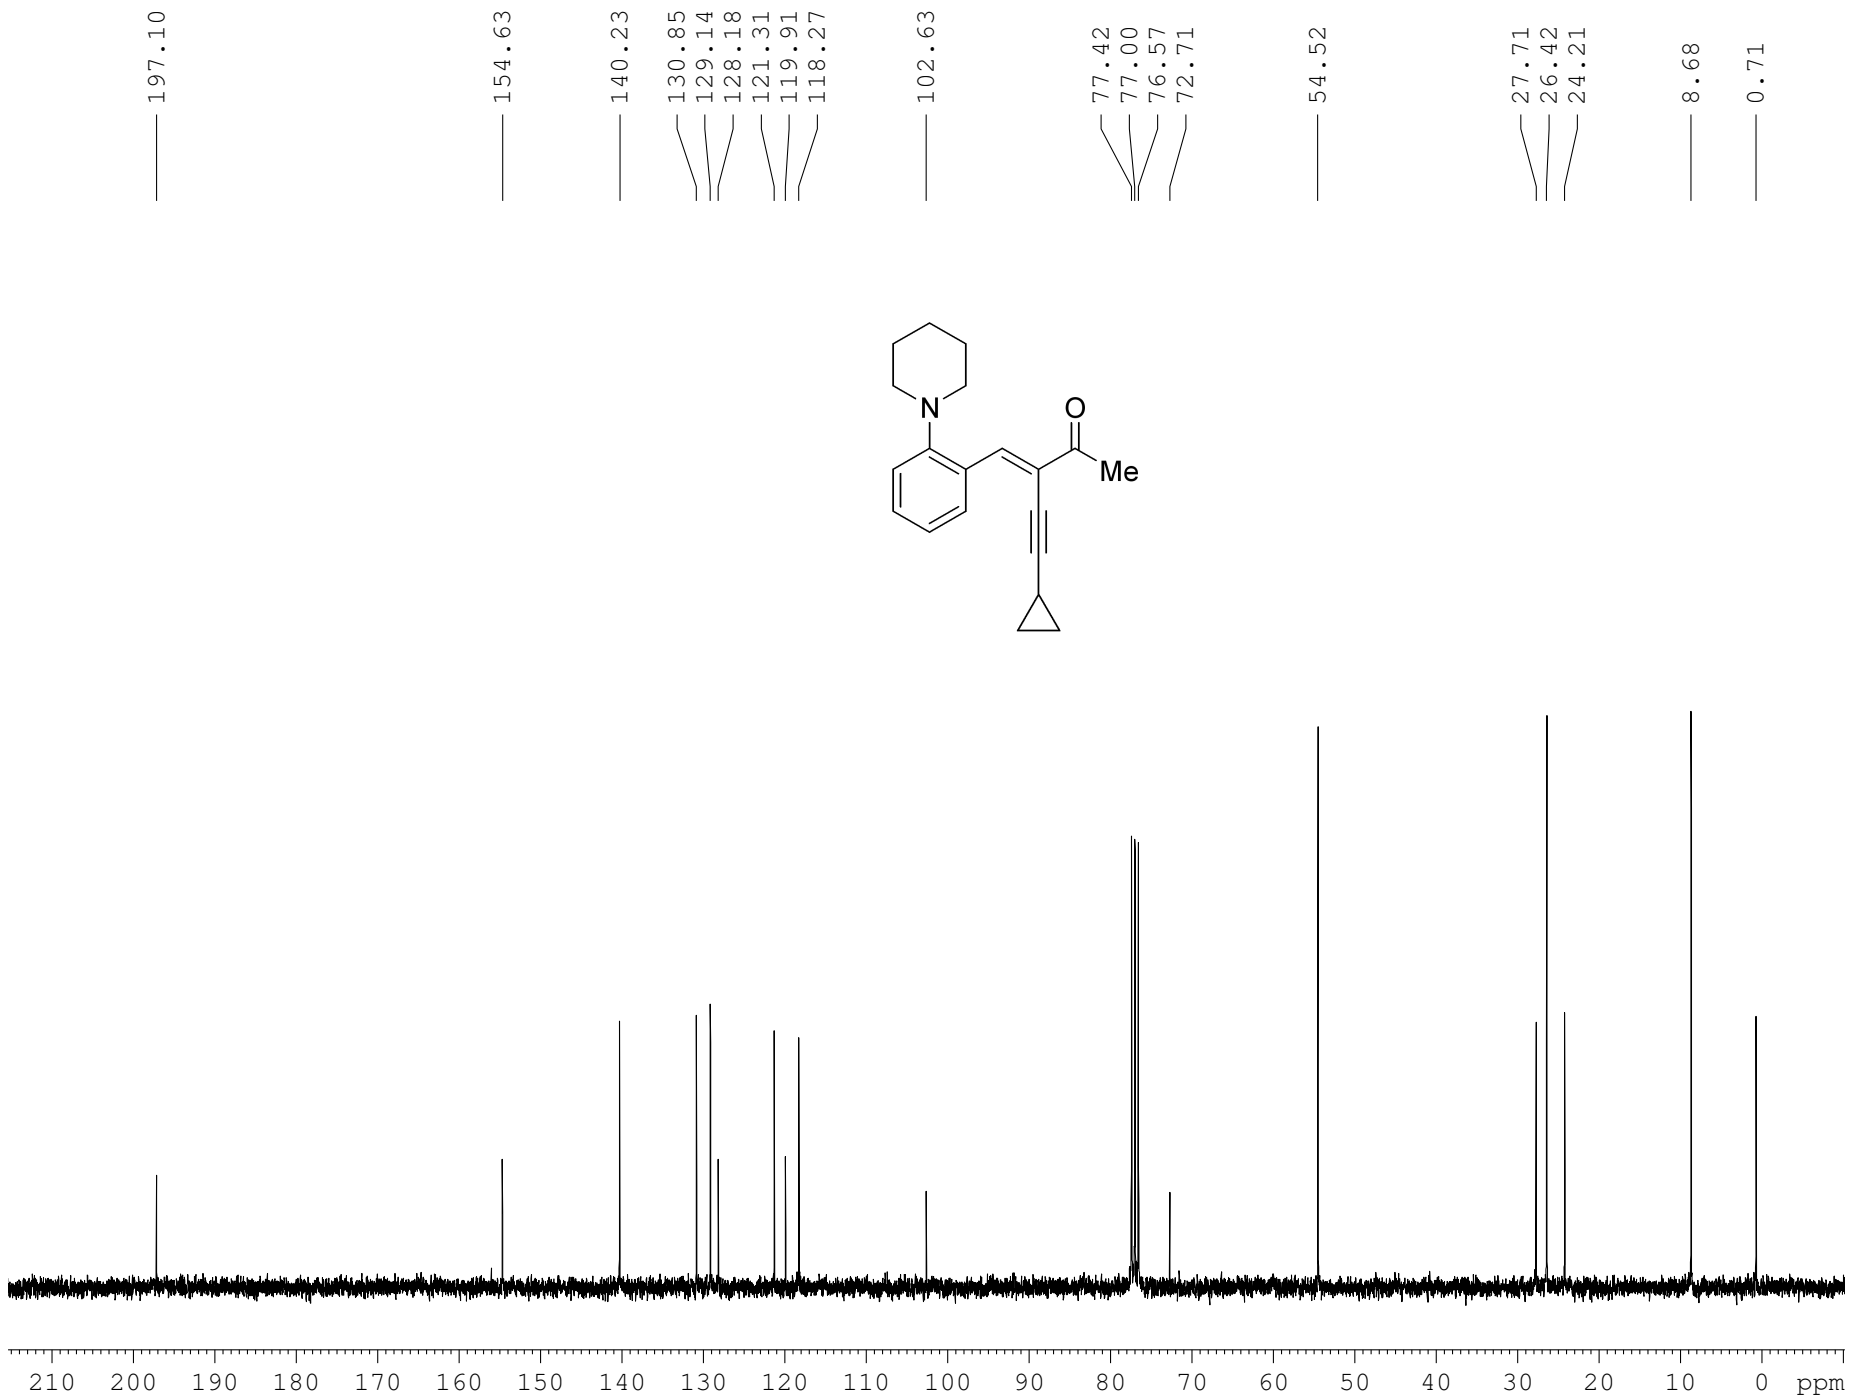

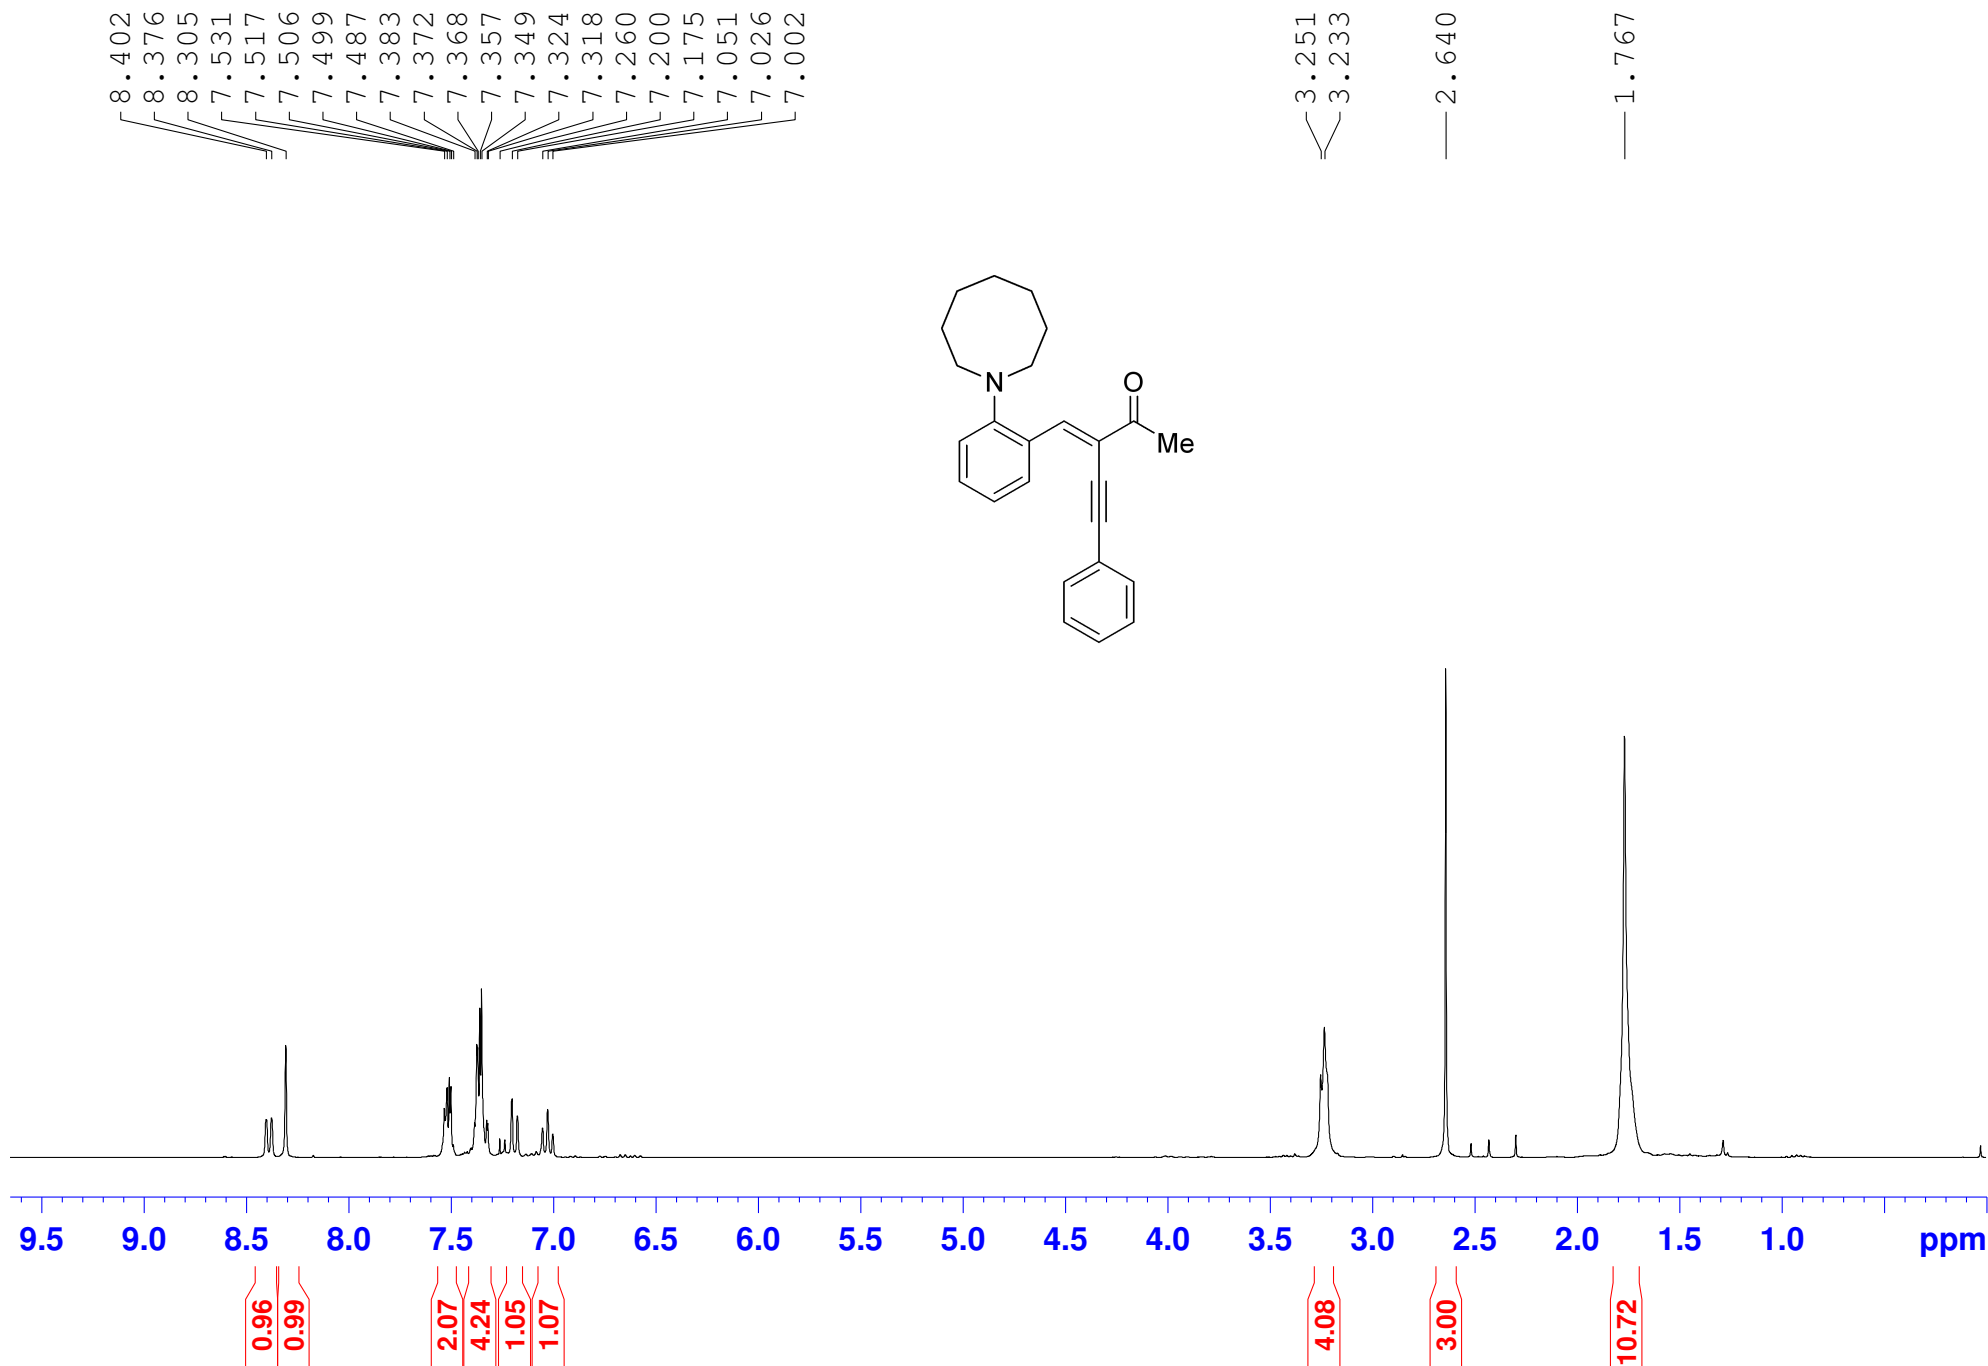

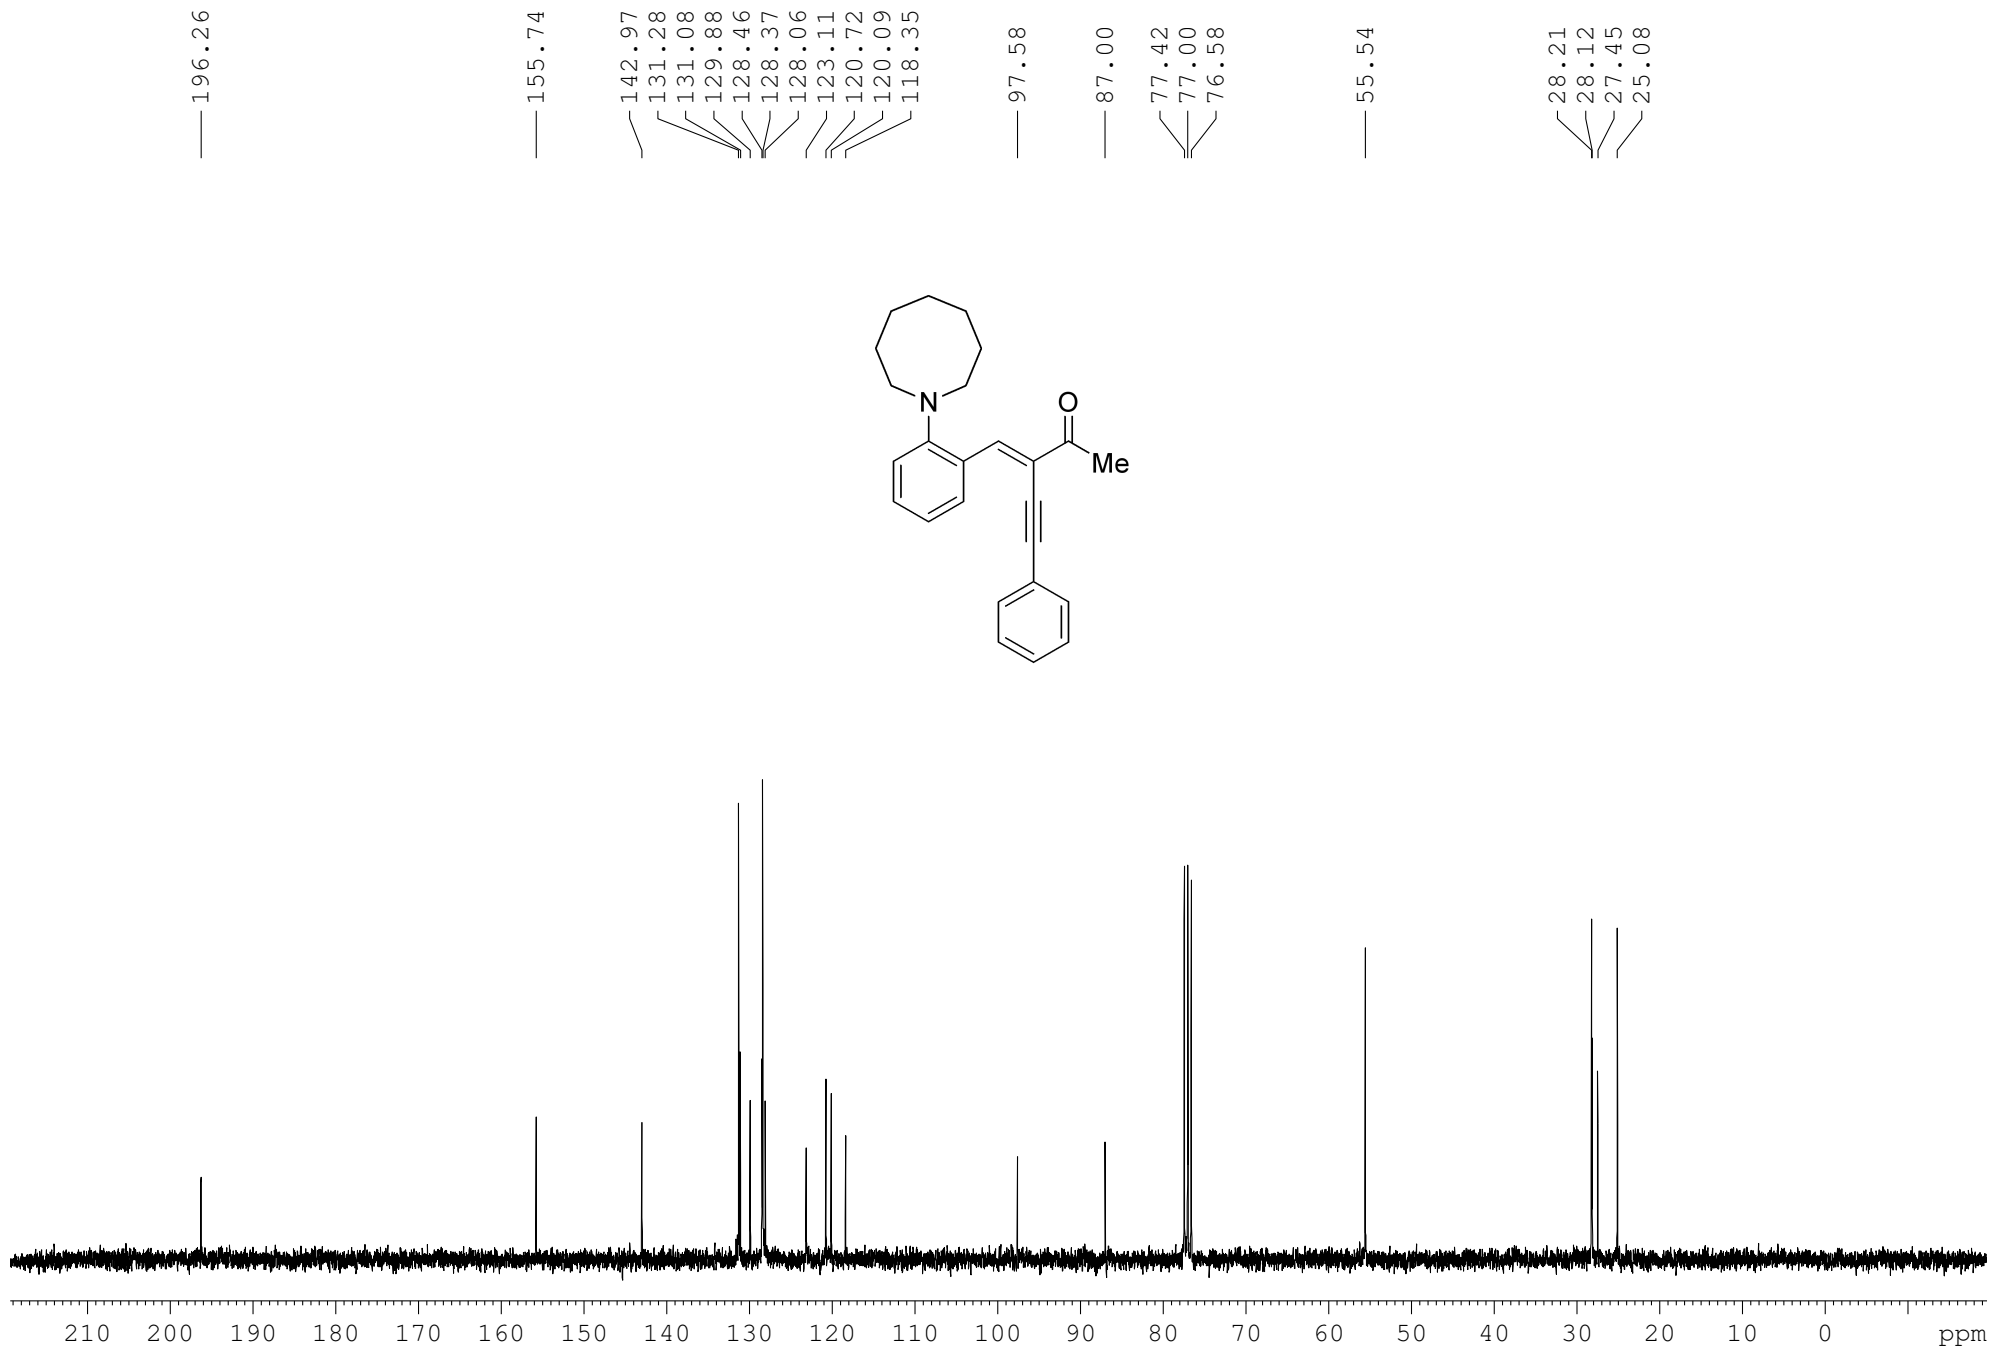

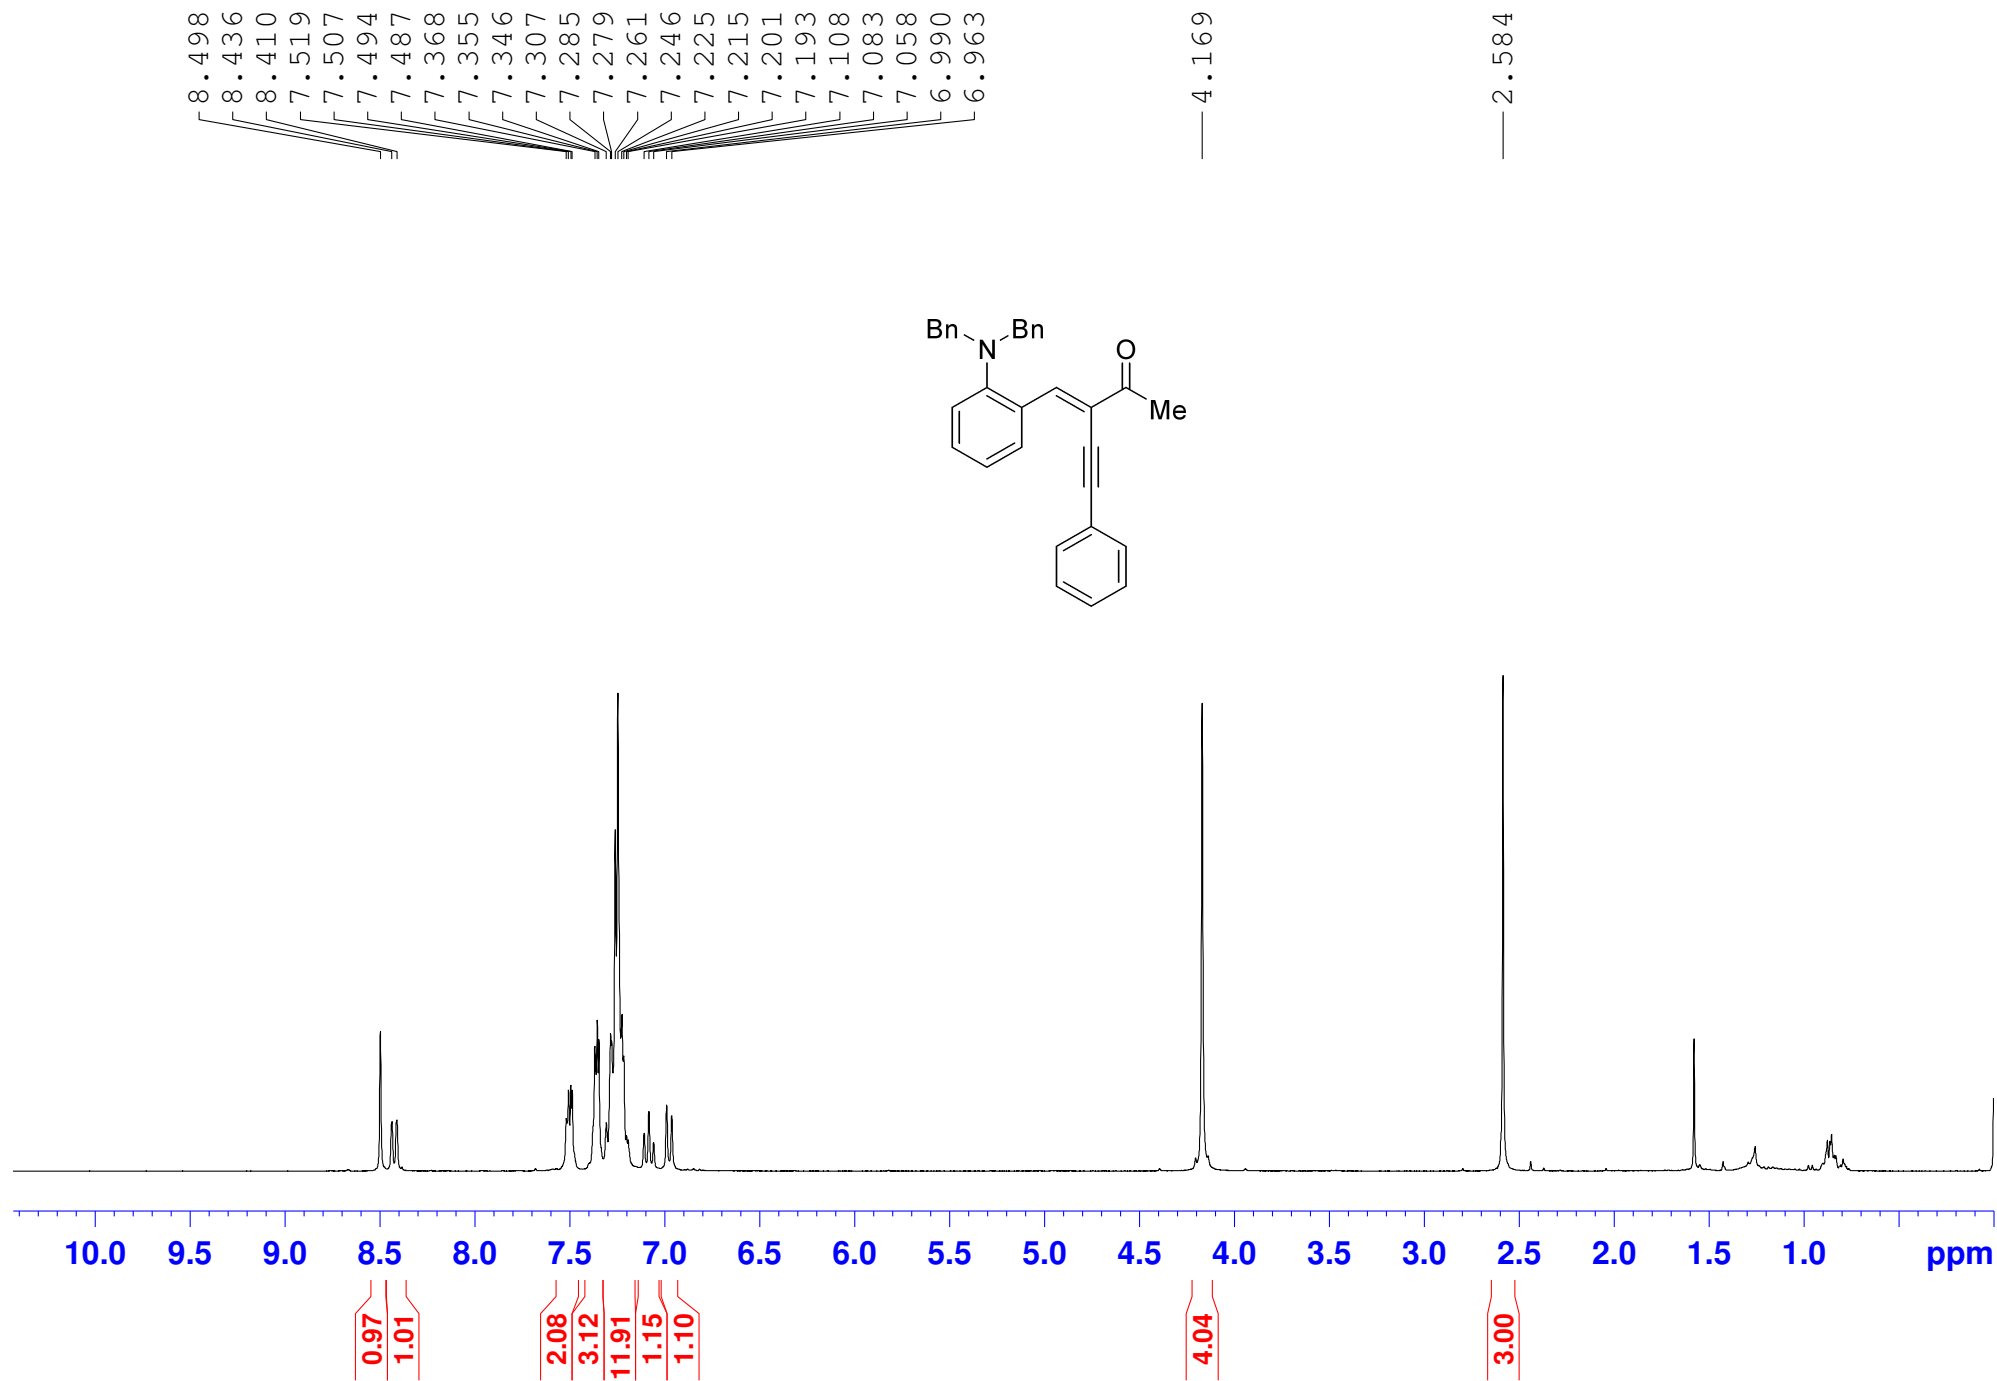

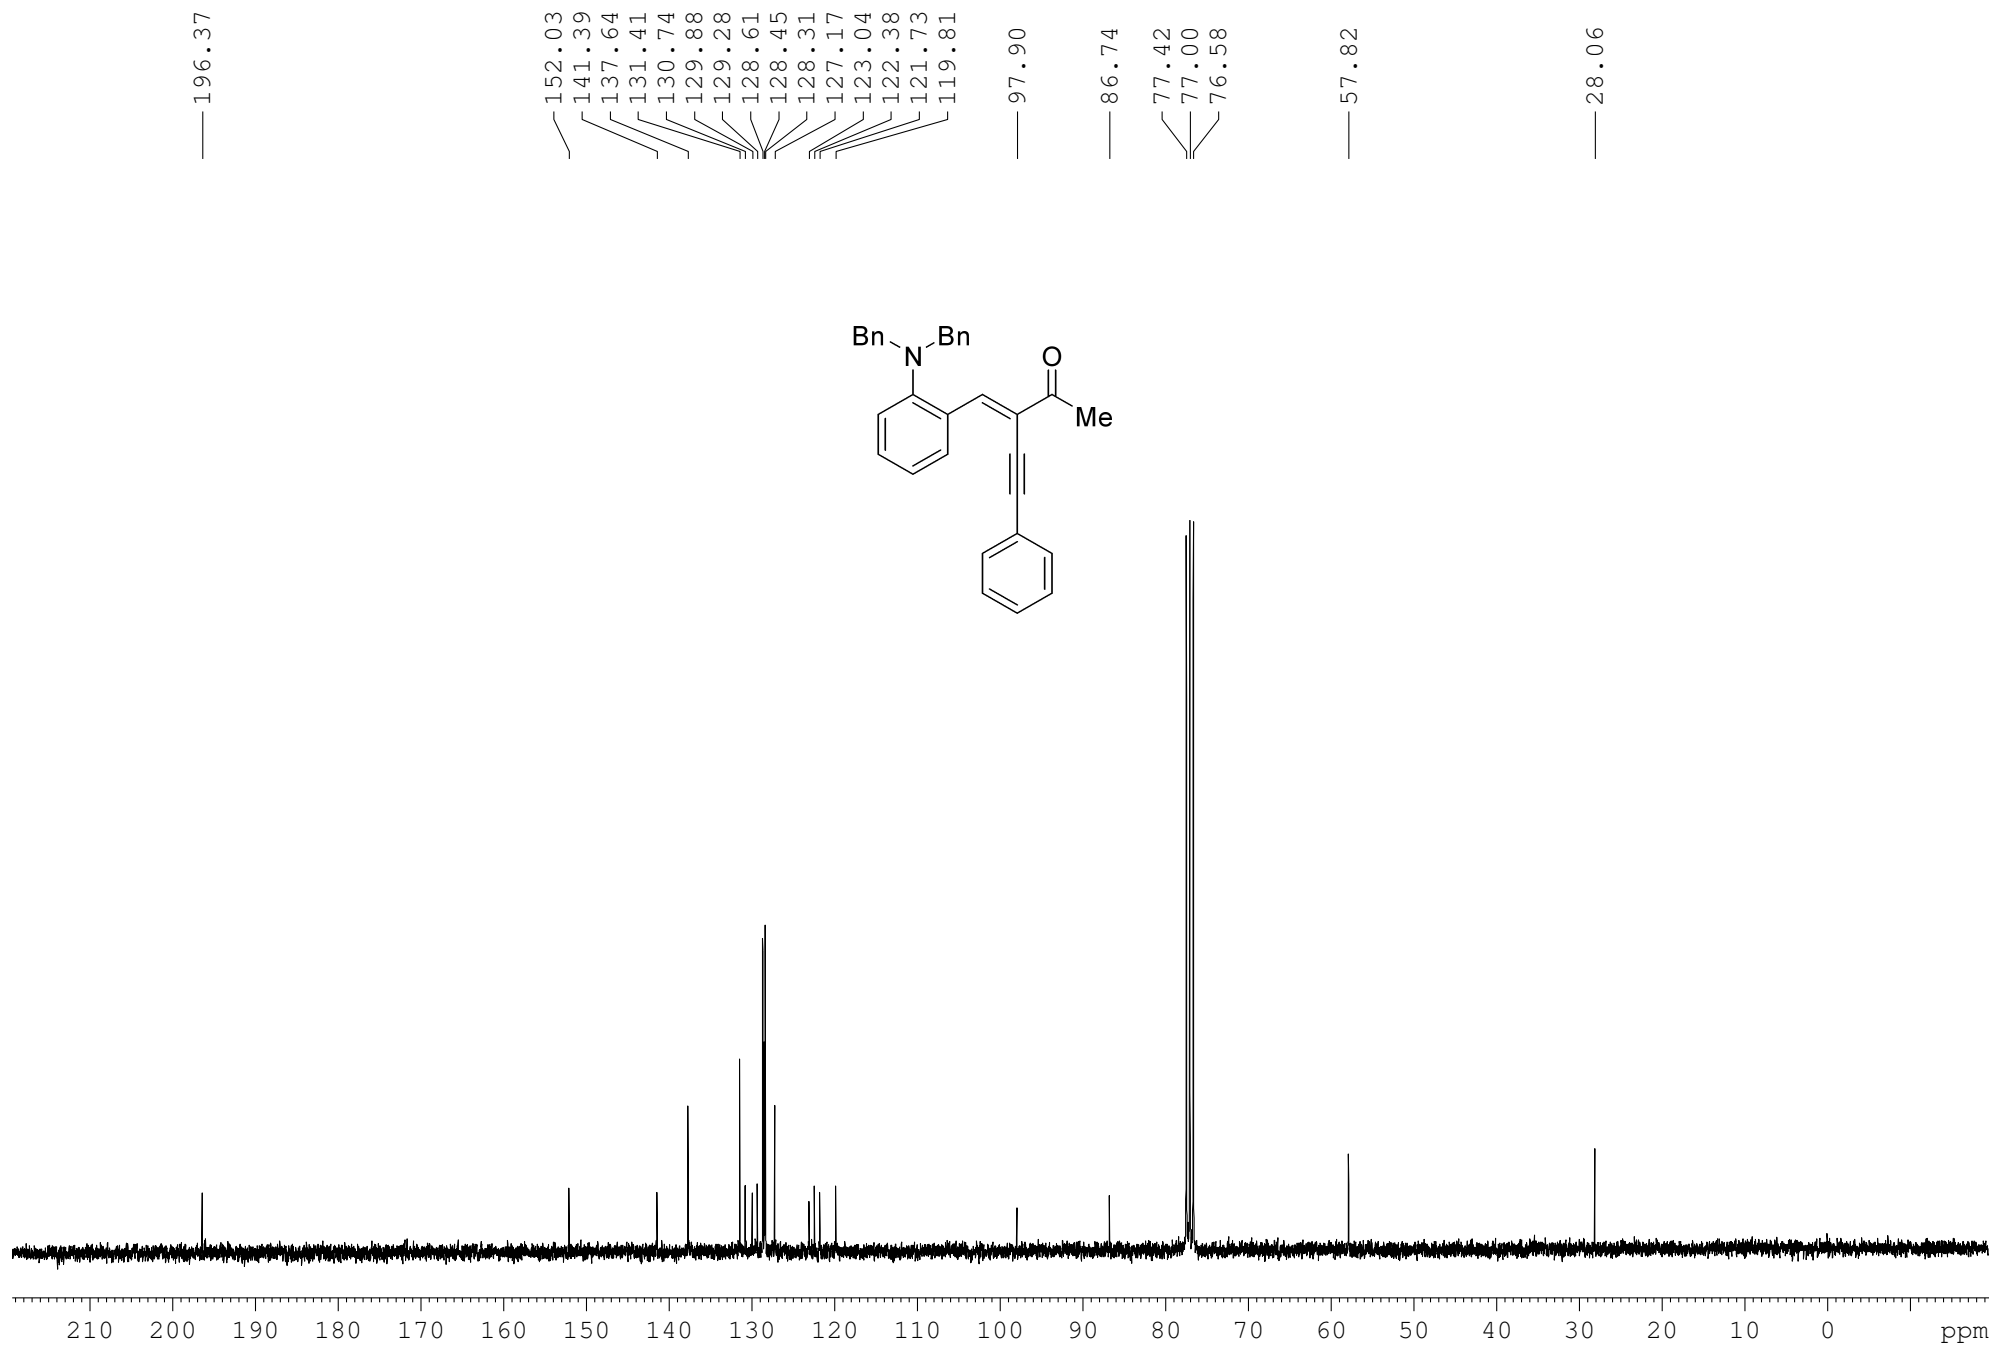

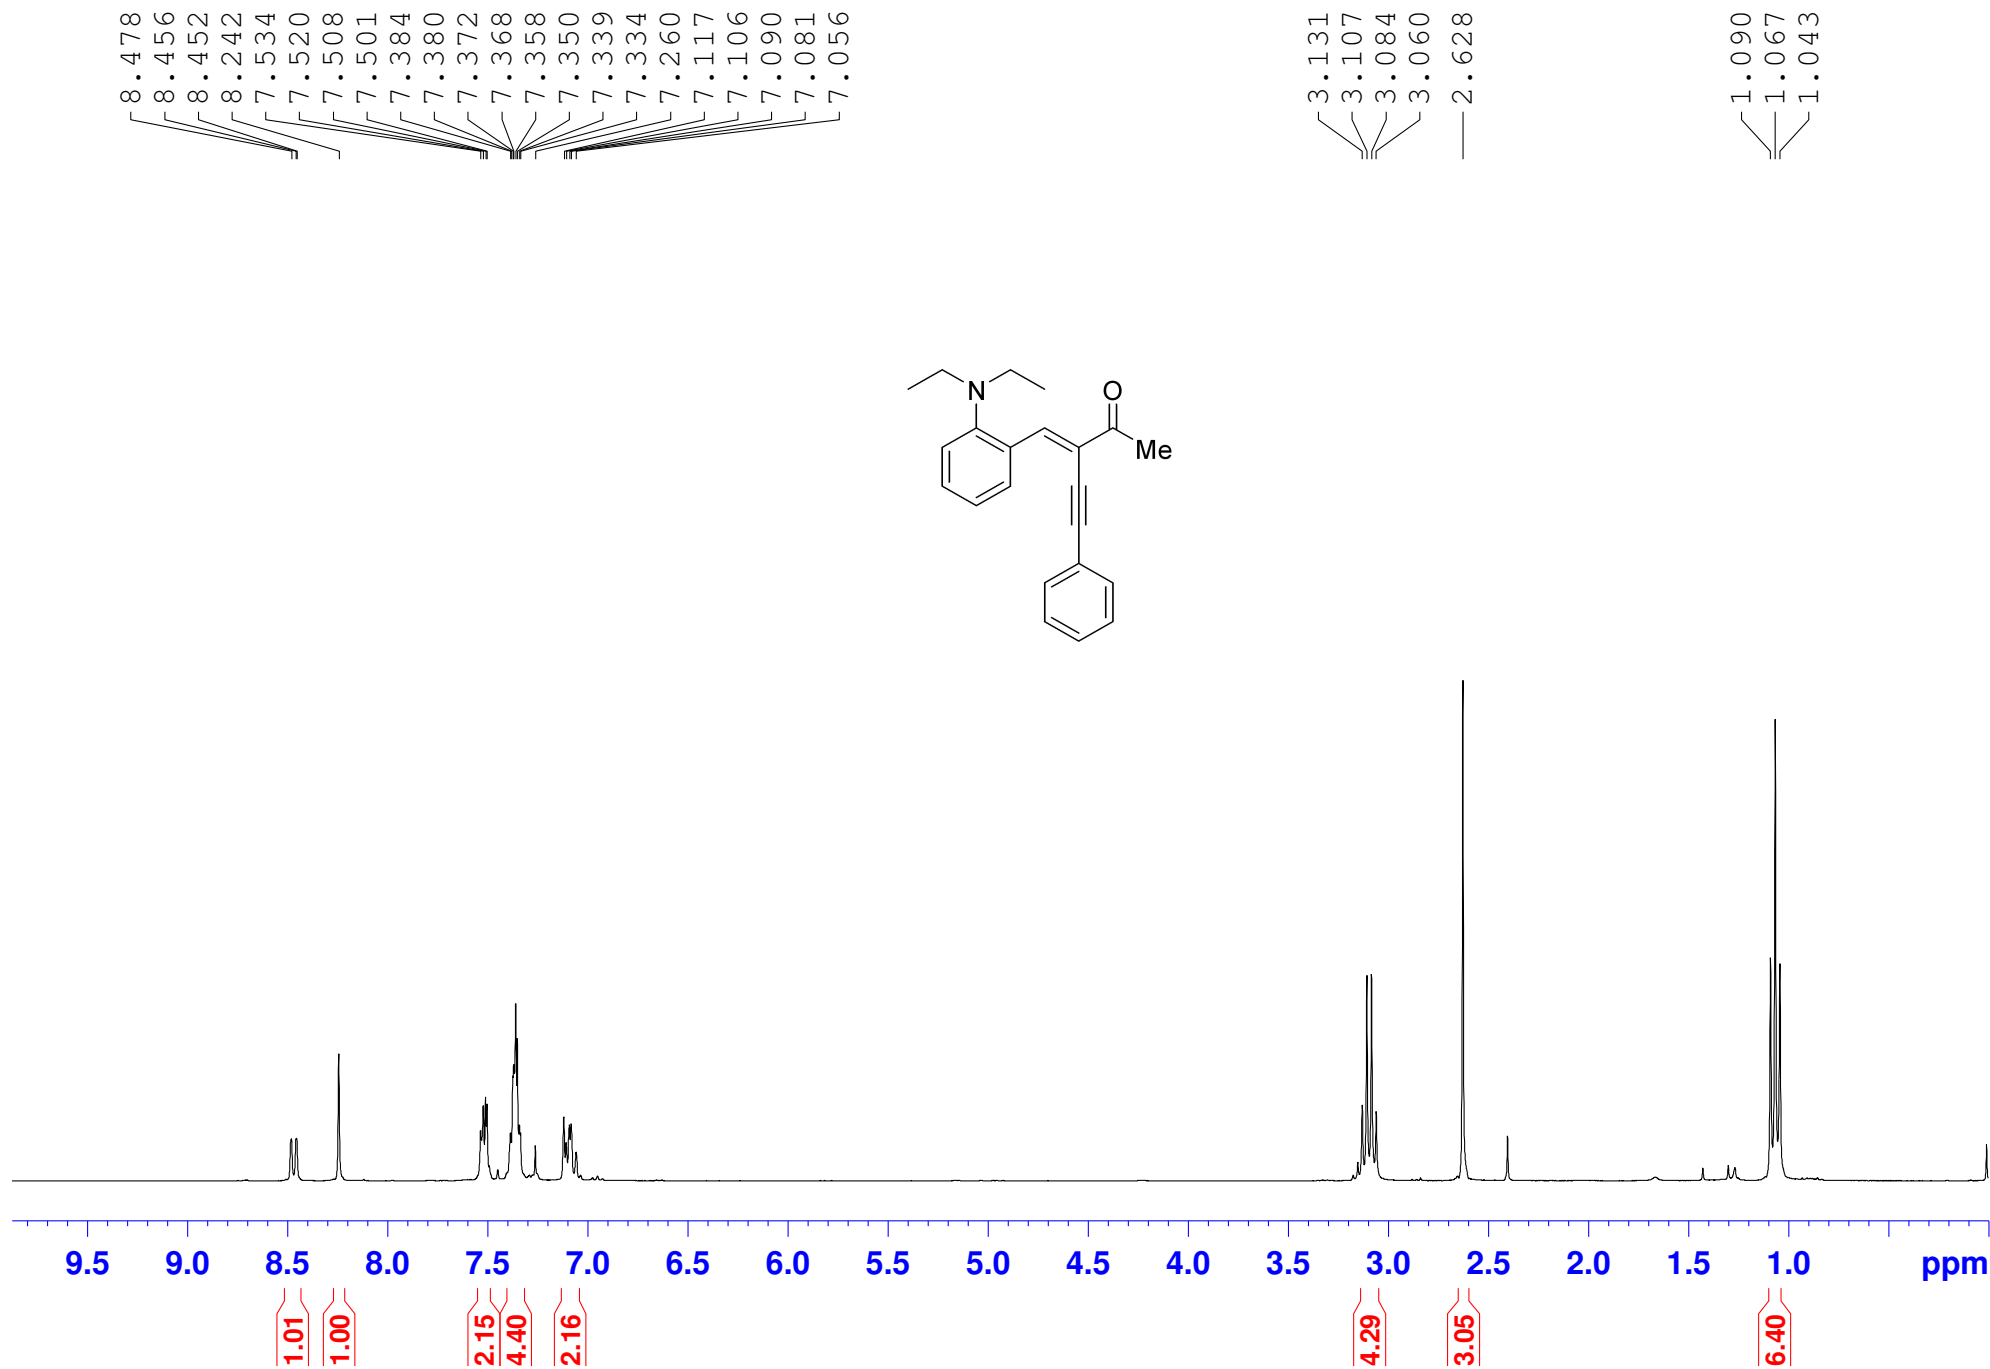



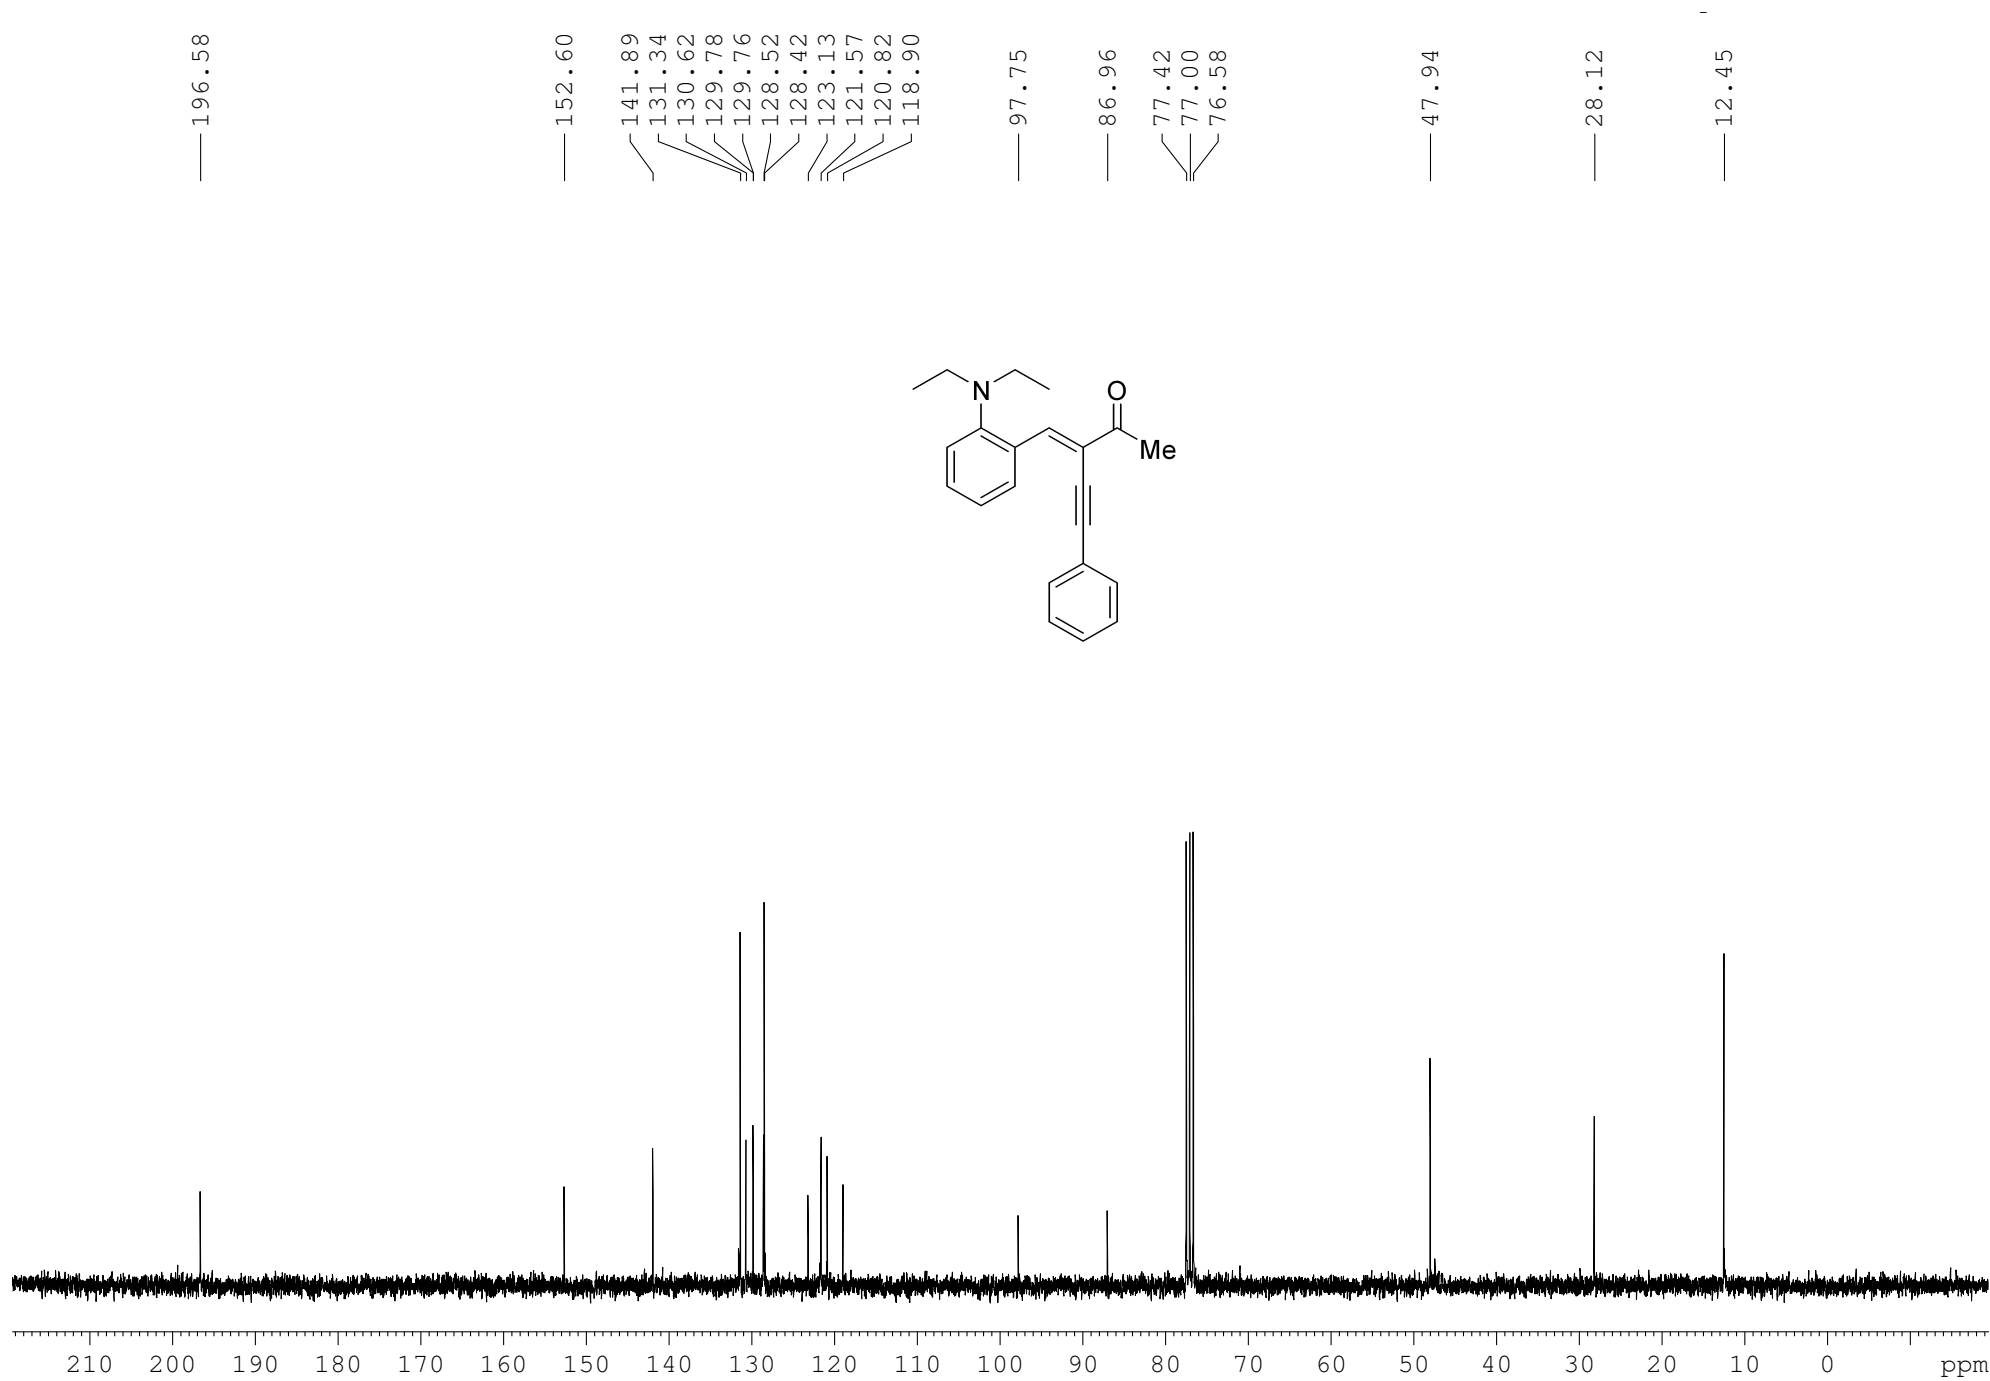

8.295  
8.267  
8.076  
7.503  
7.494  
7.483  
7.472  
7.383  
7.374  
7.363  
7.268  
7.260  
7.240  
7.179  
7.175

3.905  
3.891  
3.876

2.990  
2.975  
2.961  
— 2.613

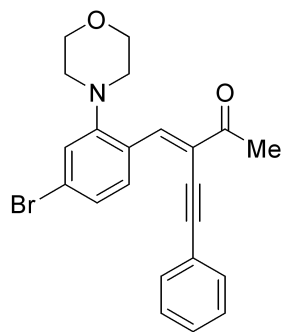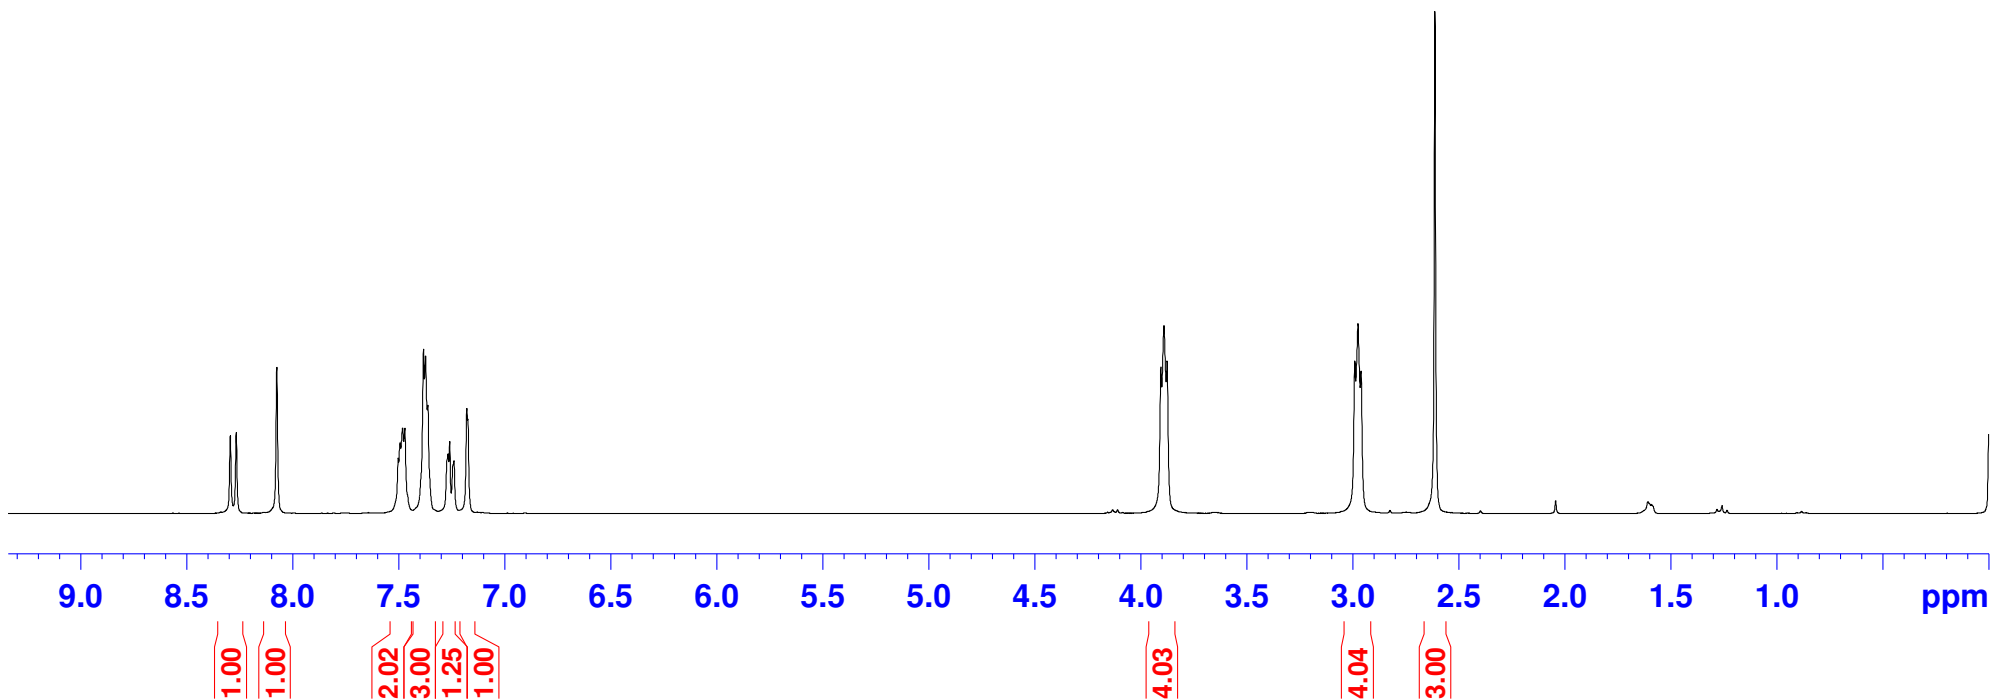

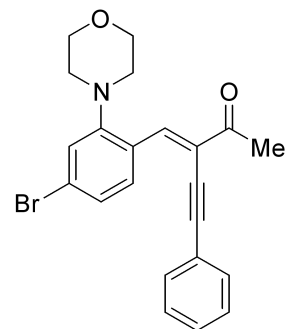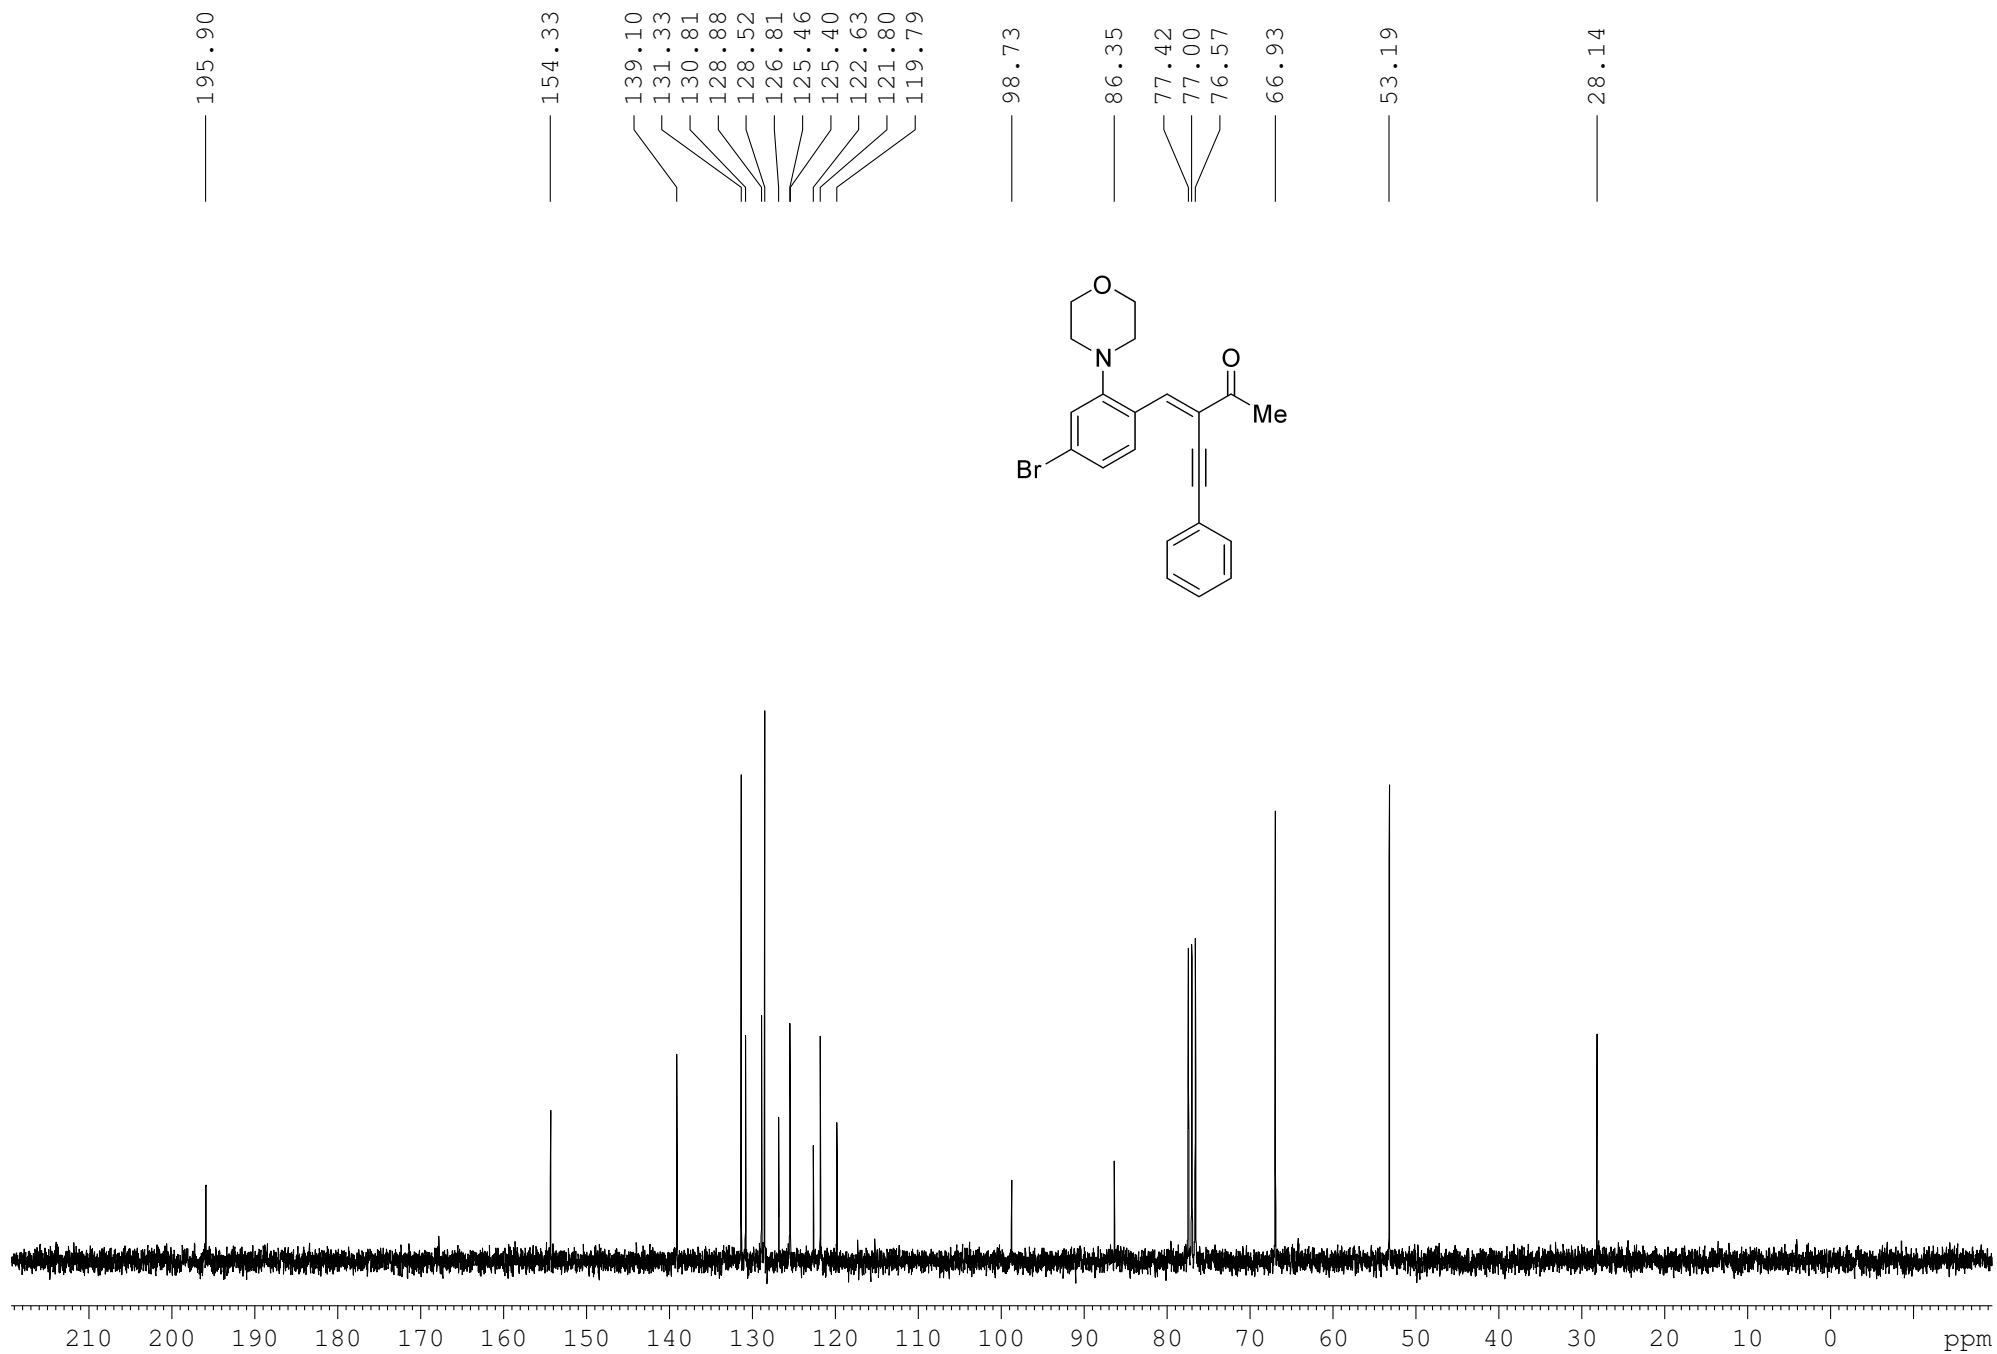

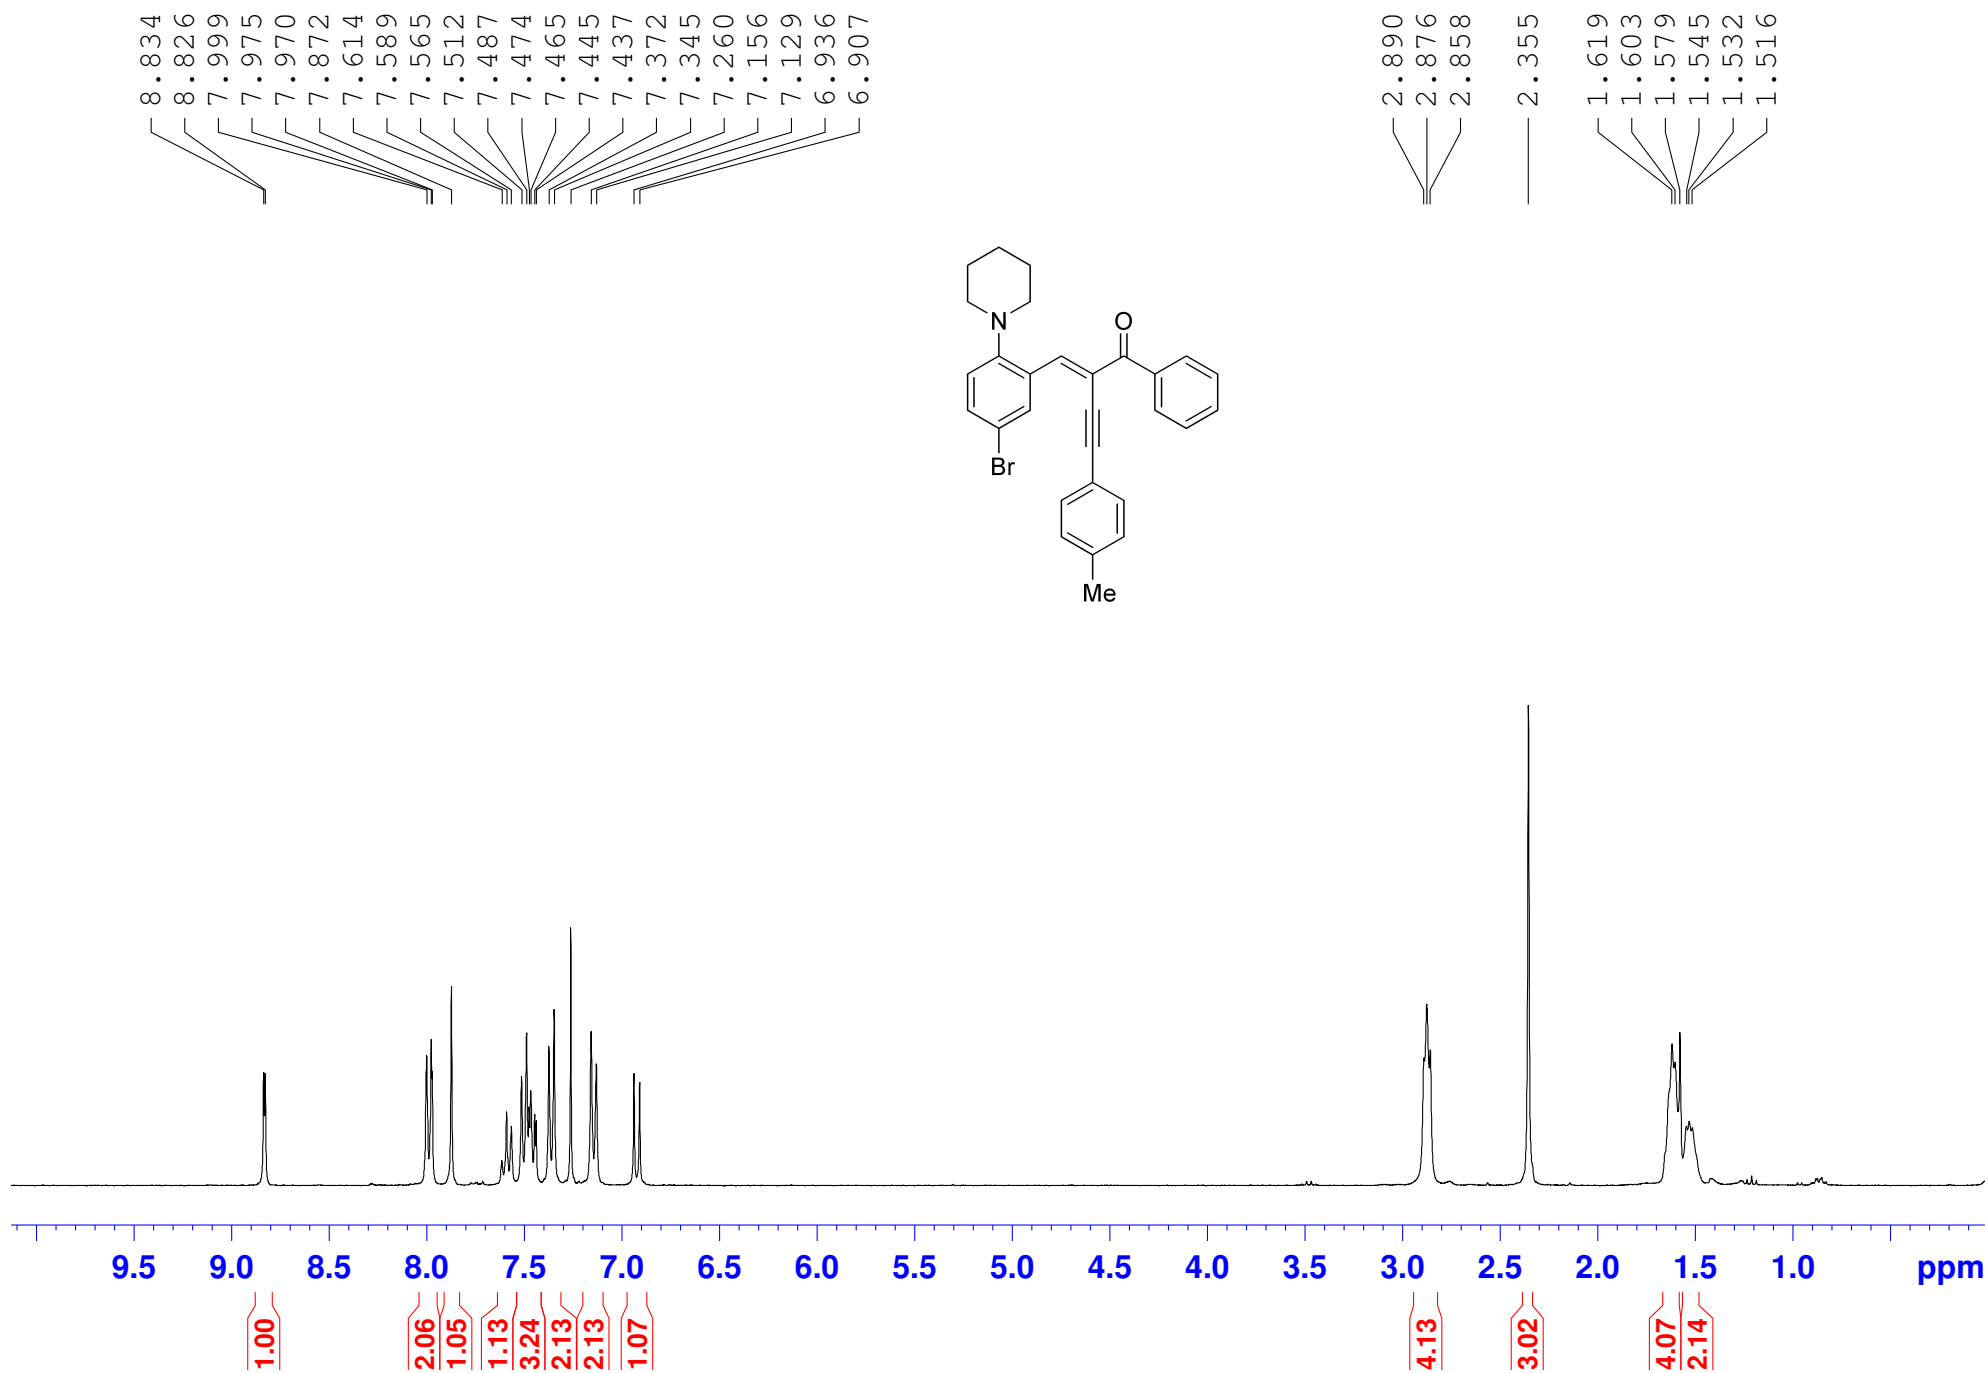

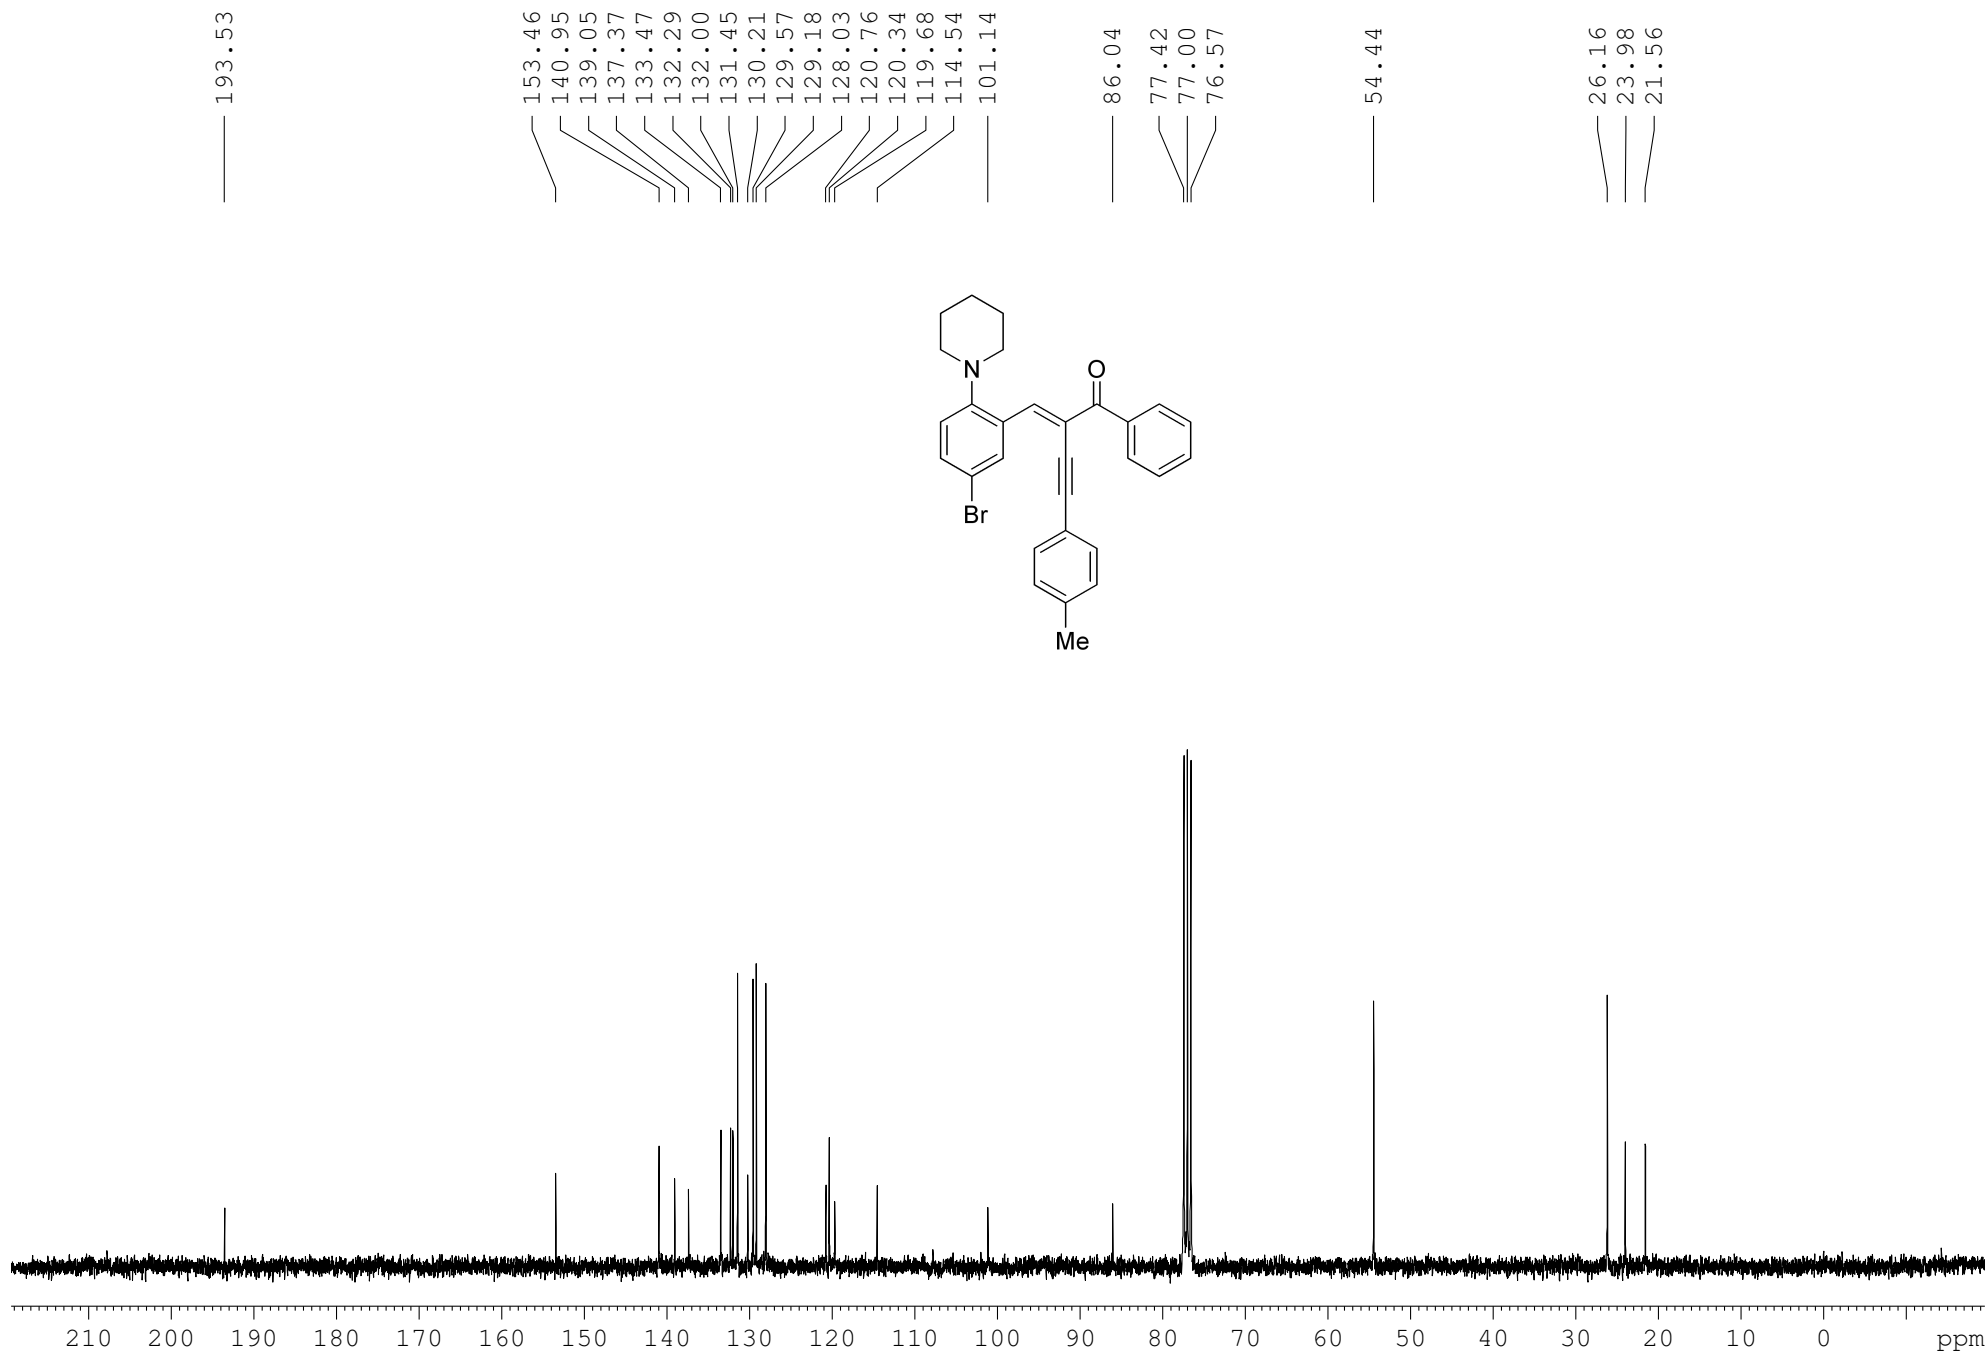

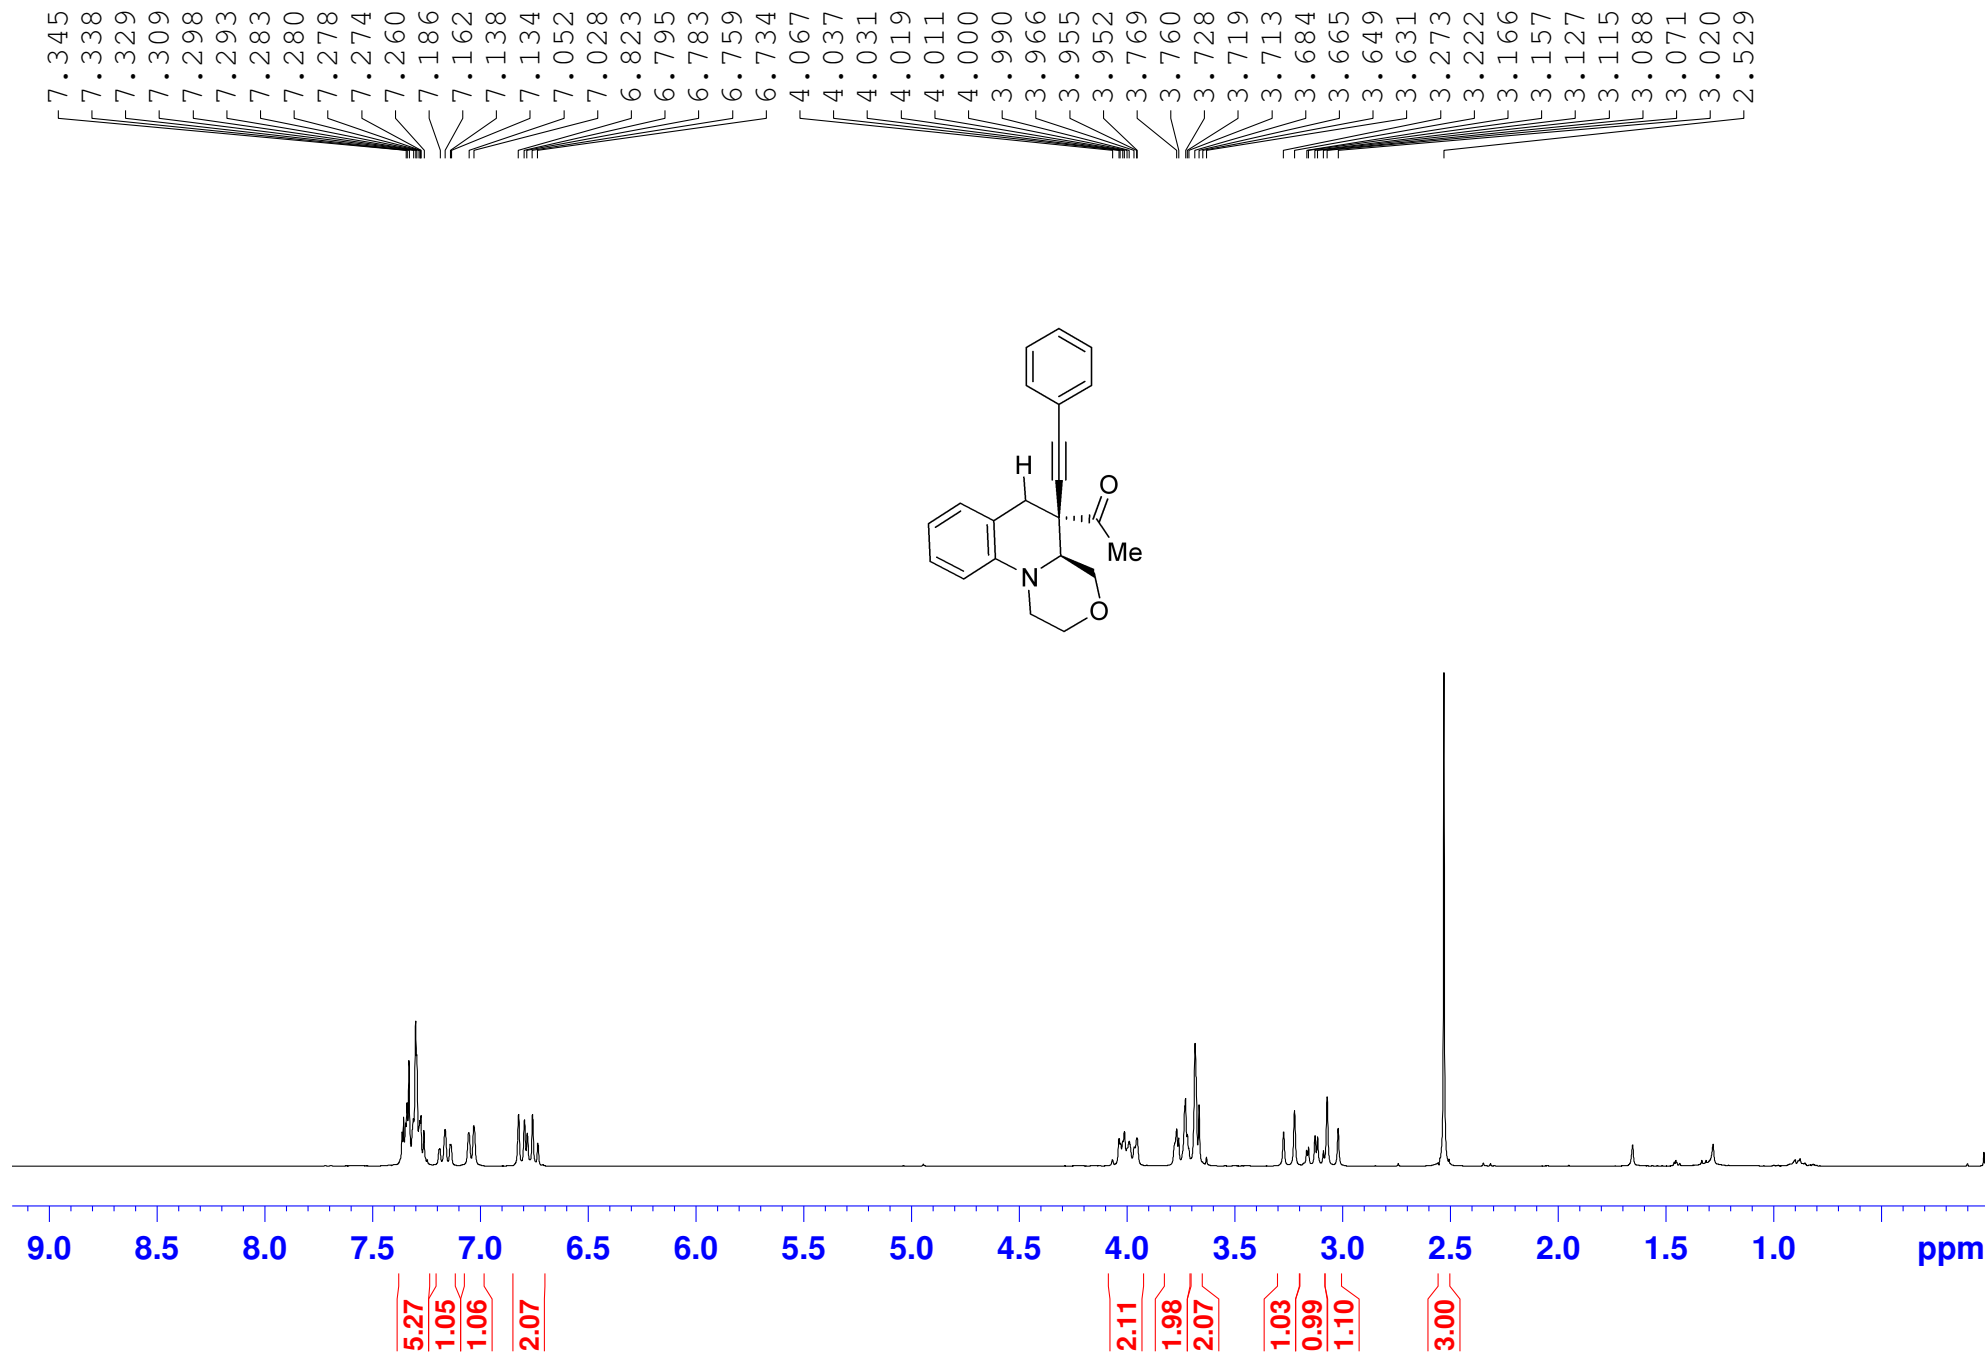

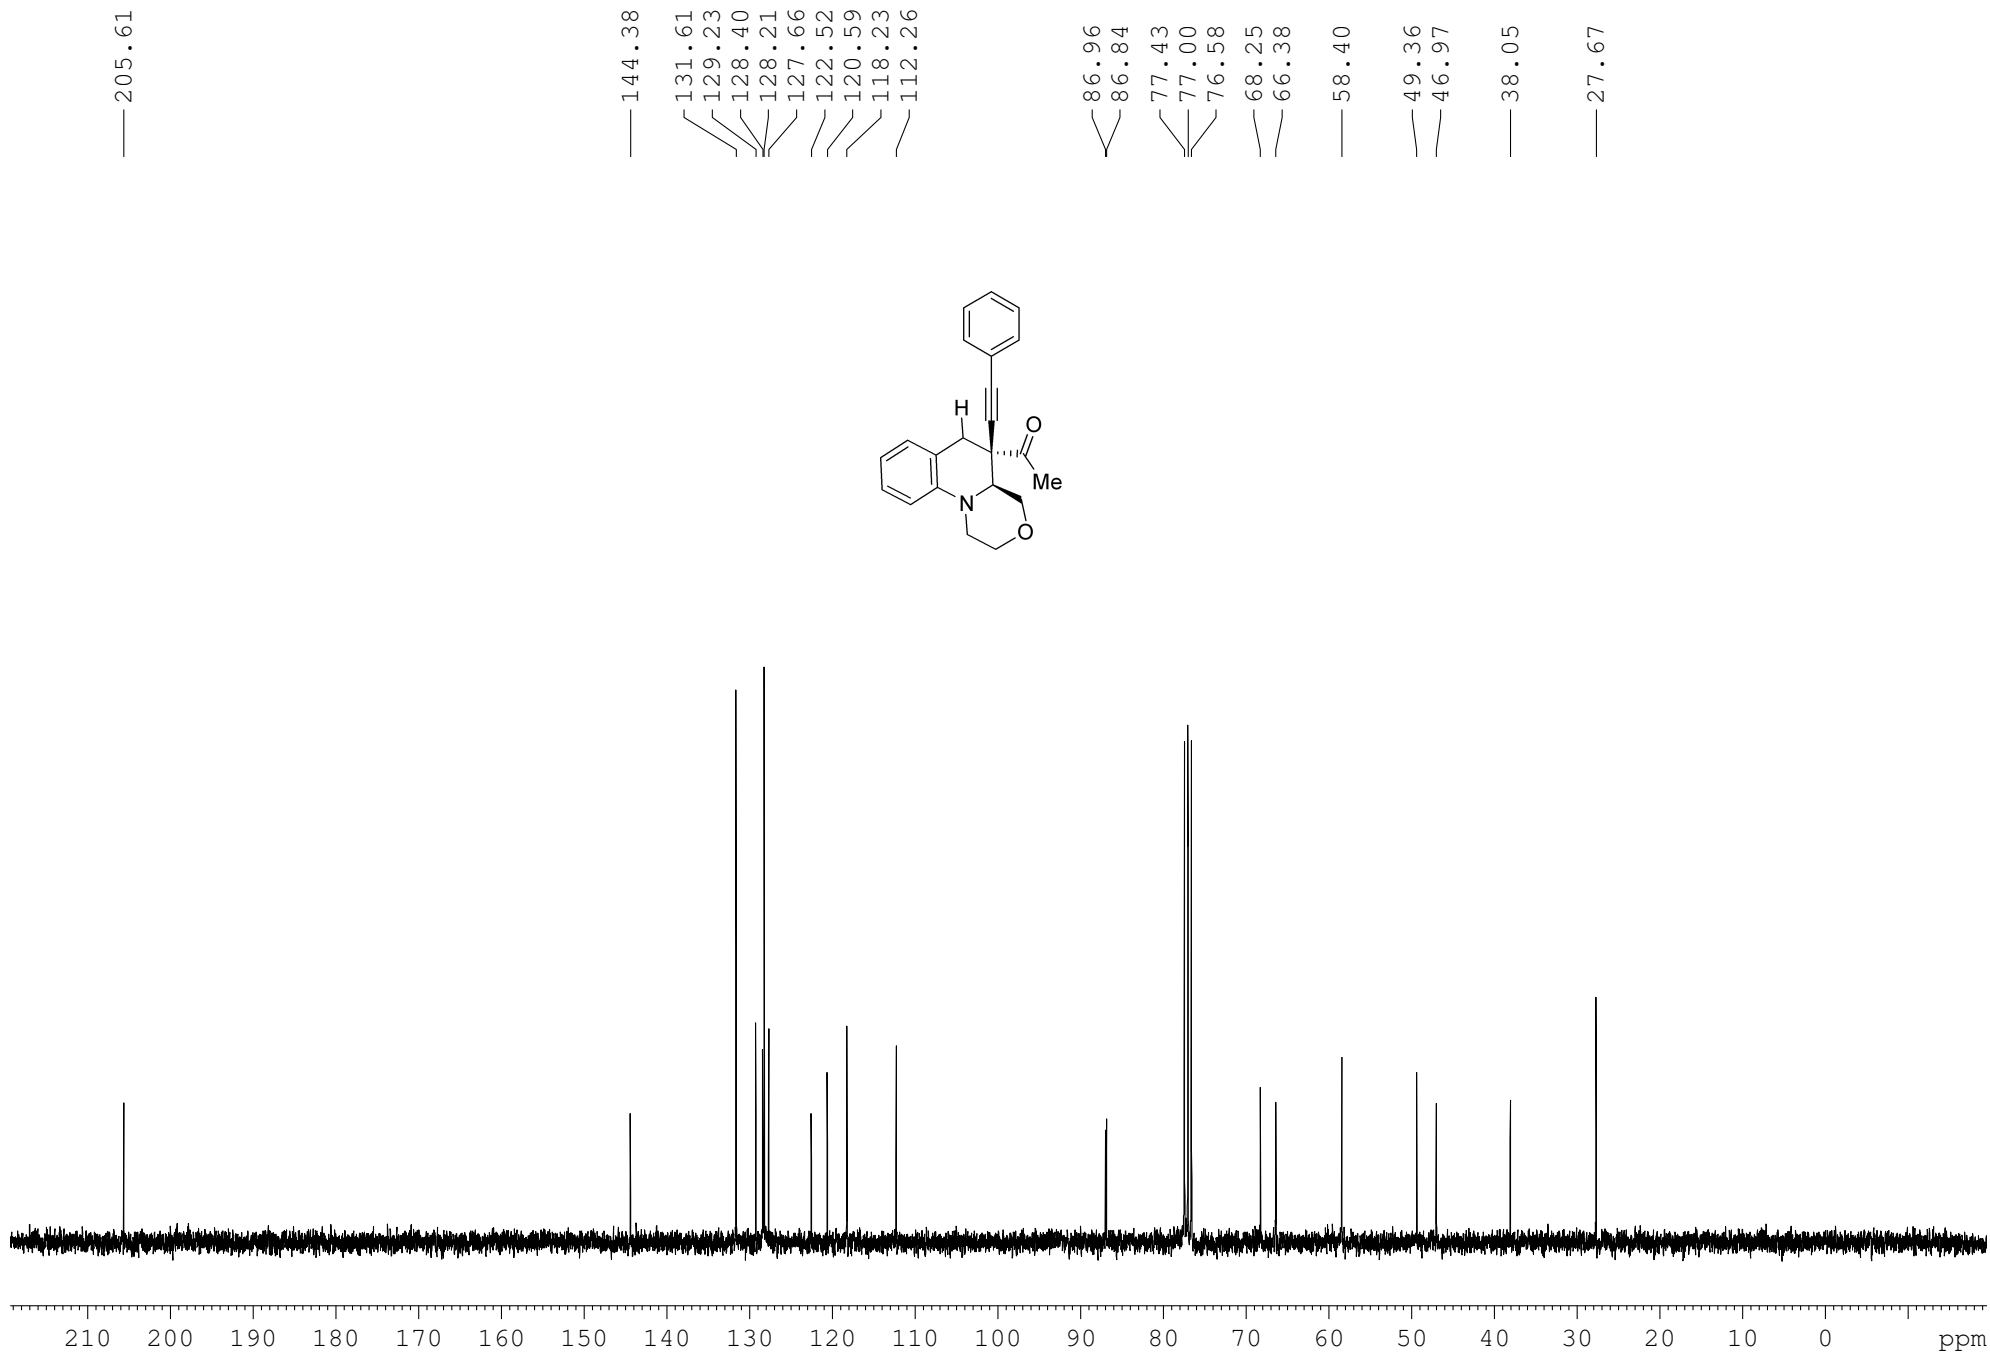

7.260  
7.248  
7.221  
7.180  
7.154  
7.128  
7.100  
7.074  
7.046  
7.021  
6.816  
6.788  
6.776  
6.751  
6.726

4.030  
4.007  
3.981  
3.945  
3.765  
3.754  
3.723  
3.678  
3.658  
3.260  
3.209  
3.126  
3.114  
3.059  
3.008  
2.516  
2.335

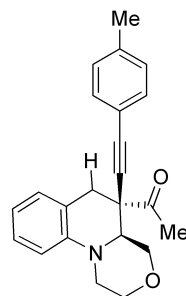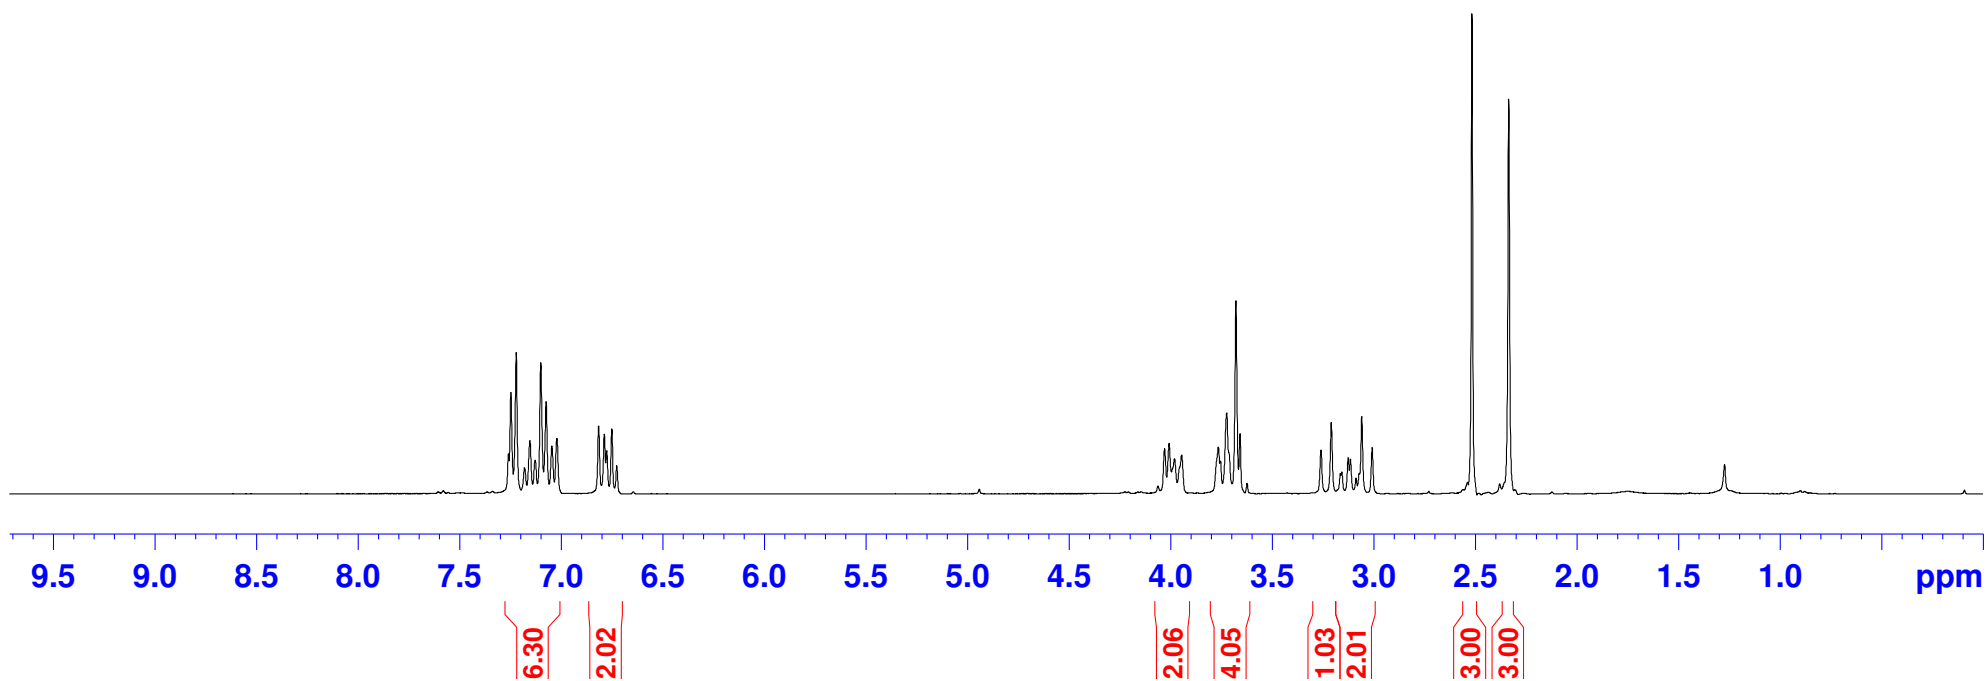



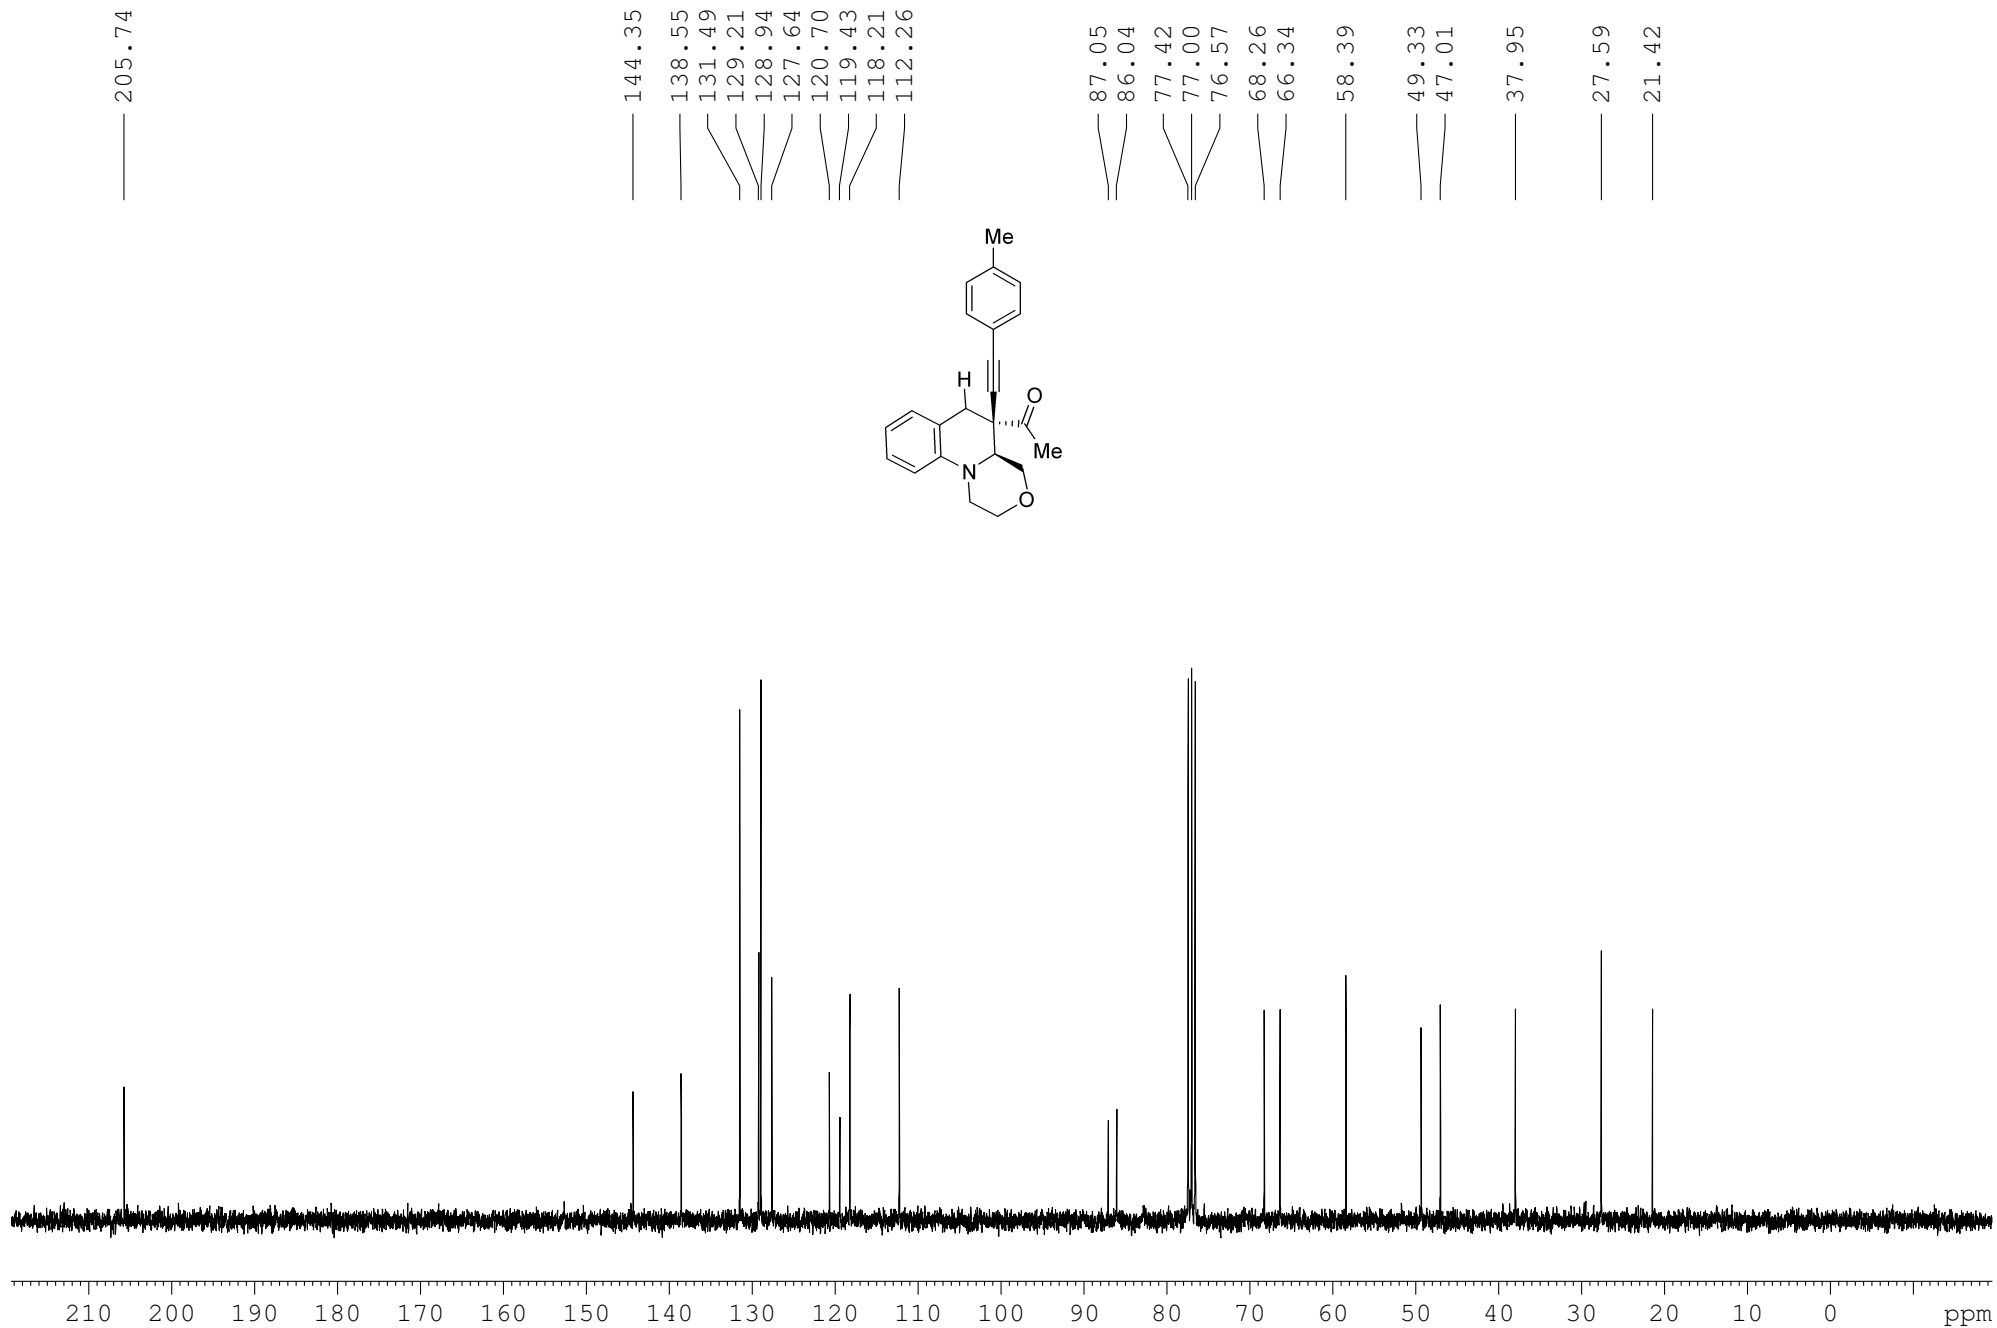

8.145  
8.116  
7.461  
7.432  
7.260  
7.194  
7.168  
7.143  
7.045  
7.021  
6.841  
6.813  
6.790  
6.765  
6.741

4.001  
3.974  
3.779  
3.748  
3.740  
3.716  
3.708  
3.676  
3.639  
3.610  
3.575  
3.295  
3.243  
3.142  
3.134  
3.102  
3.084  
3.063  
3.047  
3.032  
2.529

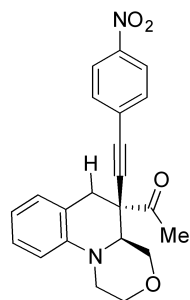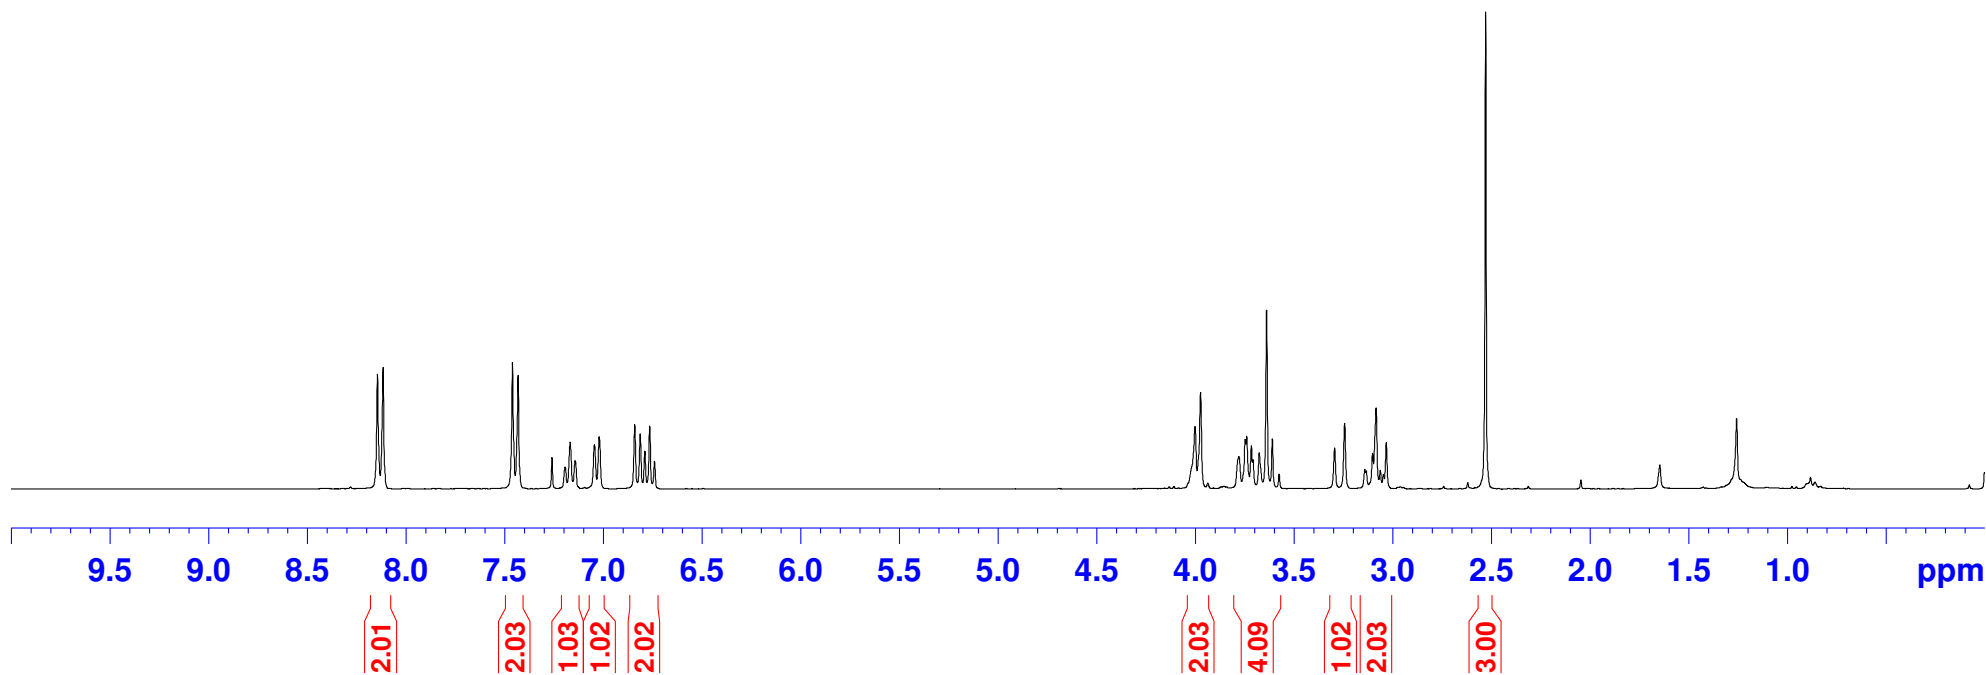

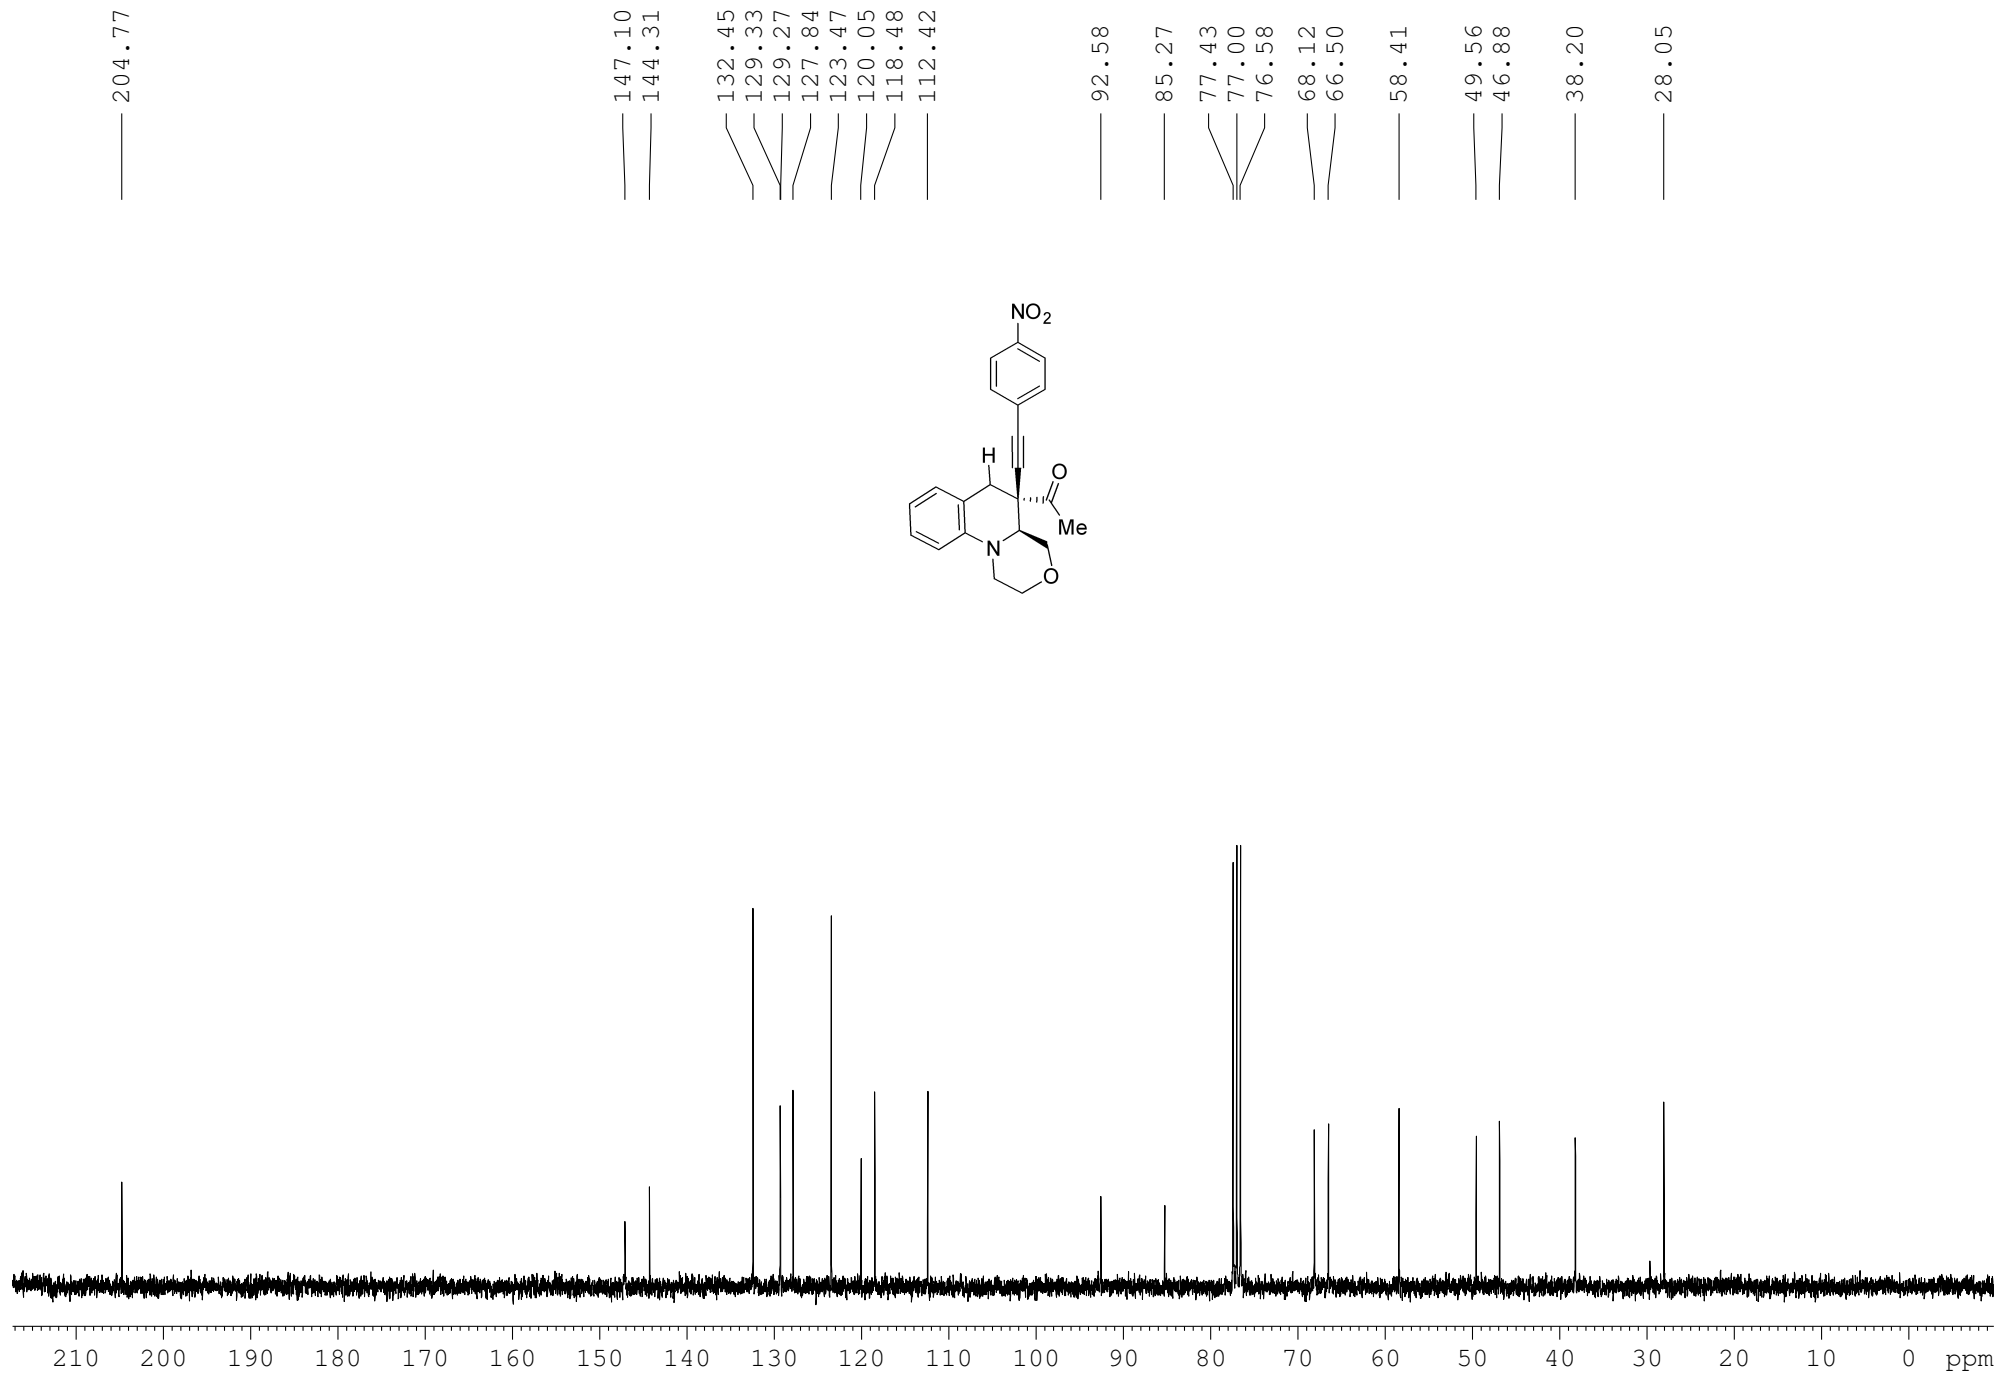

7.386  
7.373  
7.361  
7.308  
7.303  
7.290  
7.274  
7.260  
7.117  
7.090  
7.064  
7.039  
6.807  
6.779  
6.716  
6.692  
6.668

4.075  
4.027  
3.707  
3.672  
3.382  
3.330  
3.045  
2.991  
2.973  
2.936  
2.901  
2.889  
2.454  
1.956  
1.920  
1.683  
1.674  
1.645  
1.617  
1.576  
1.549

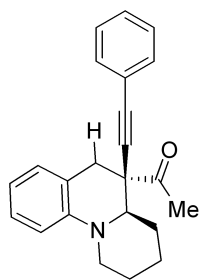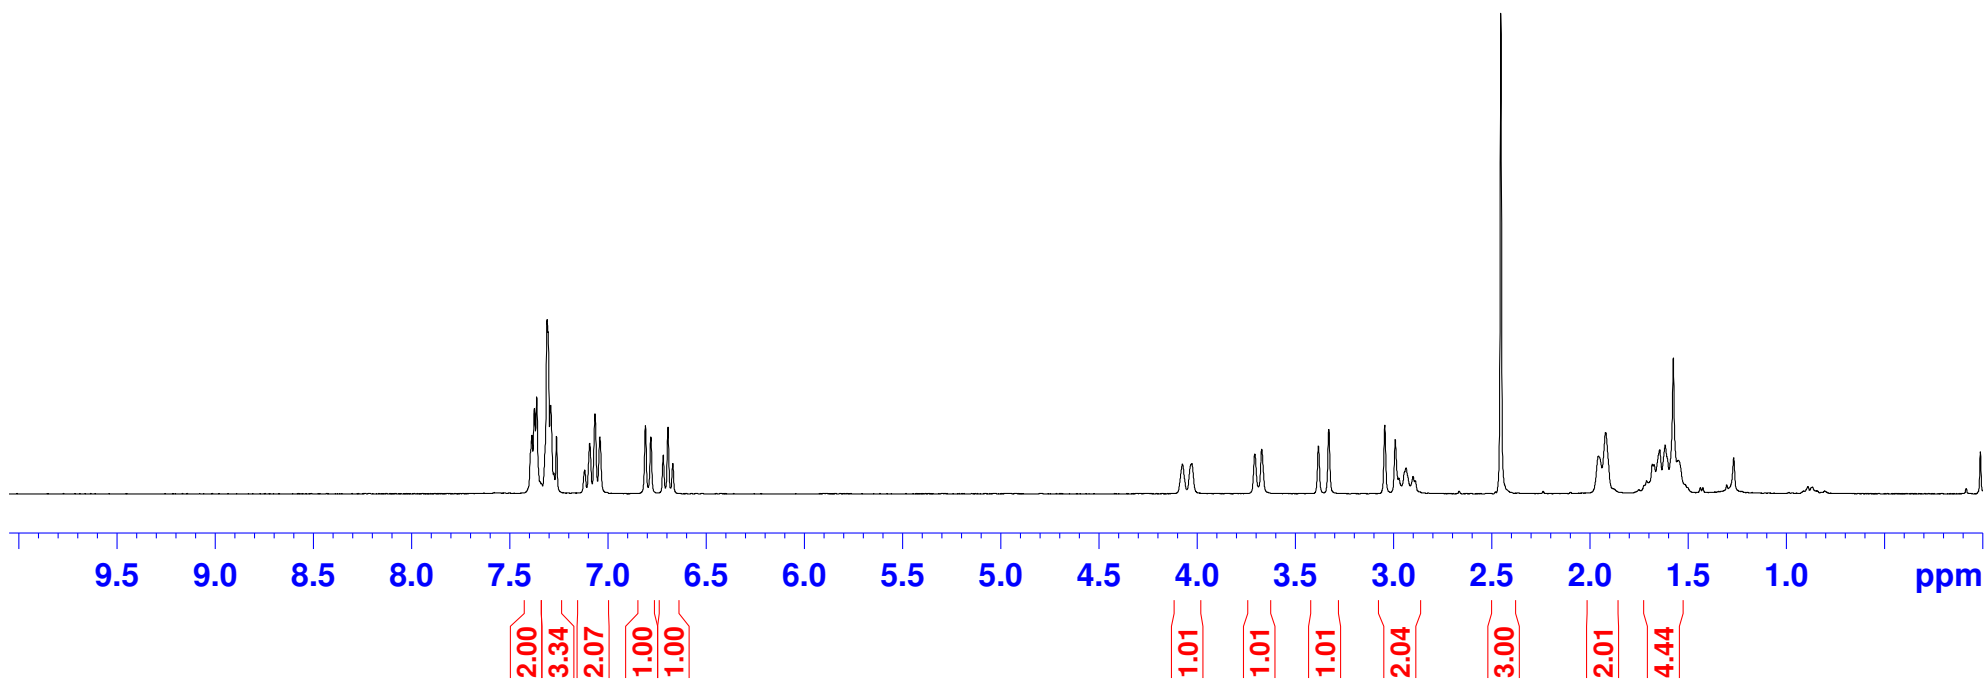

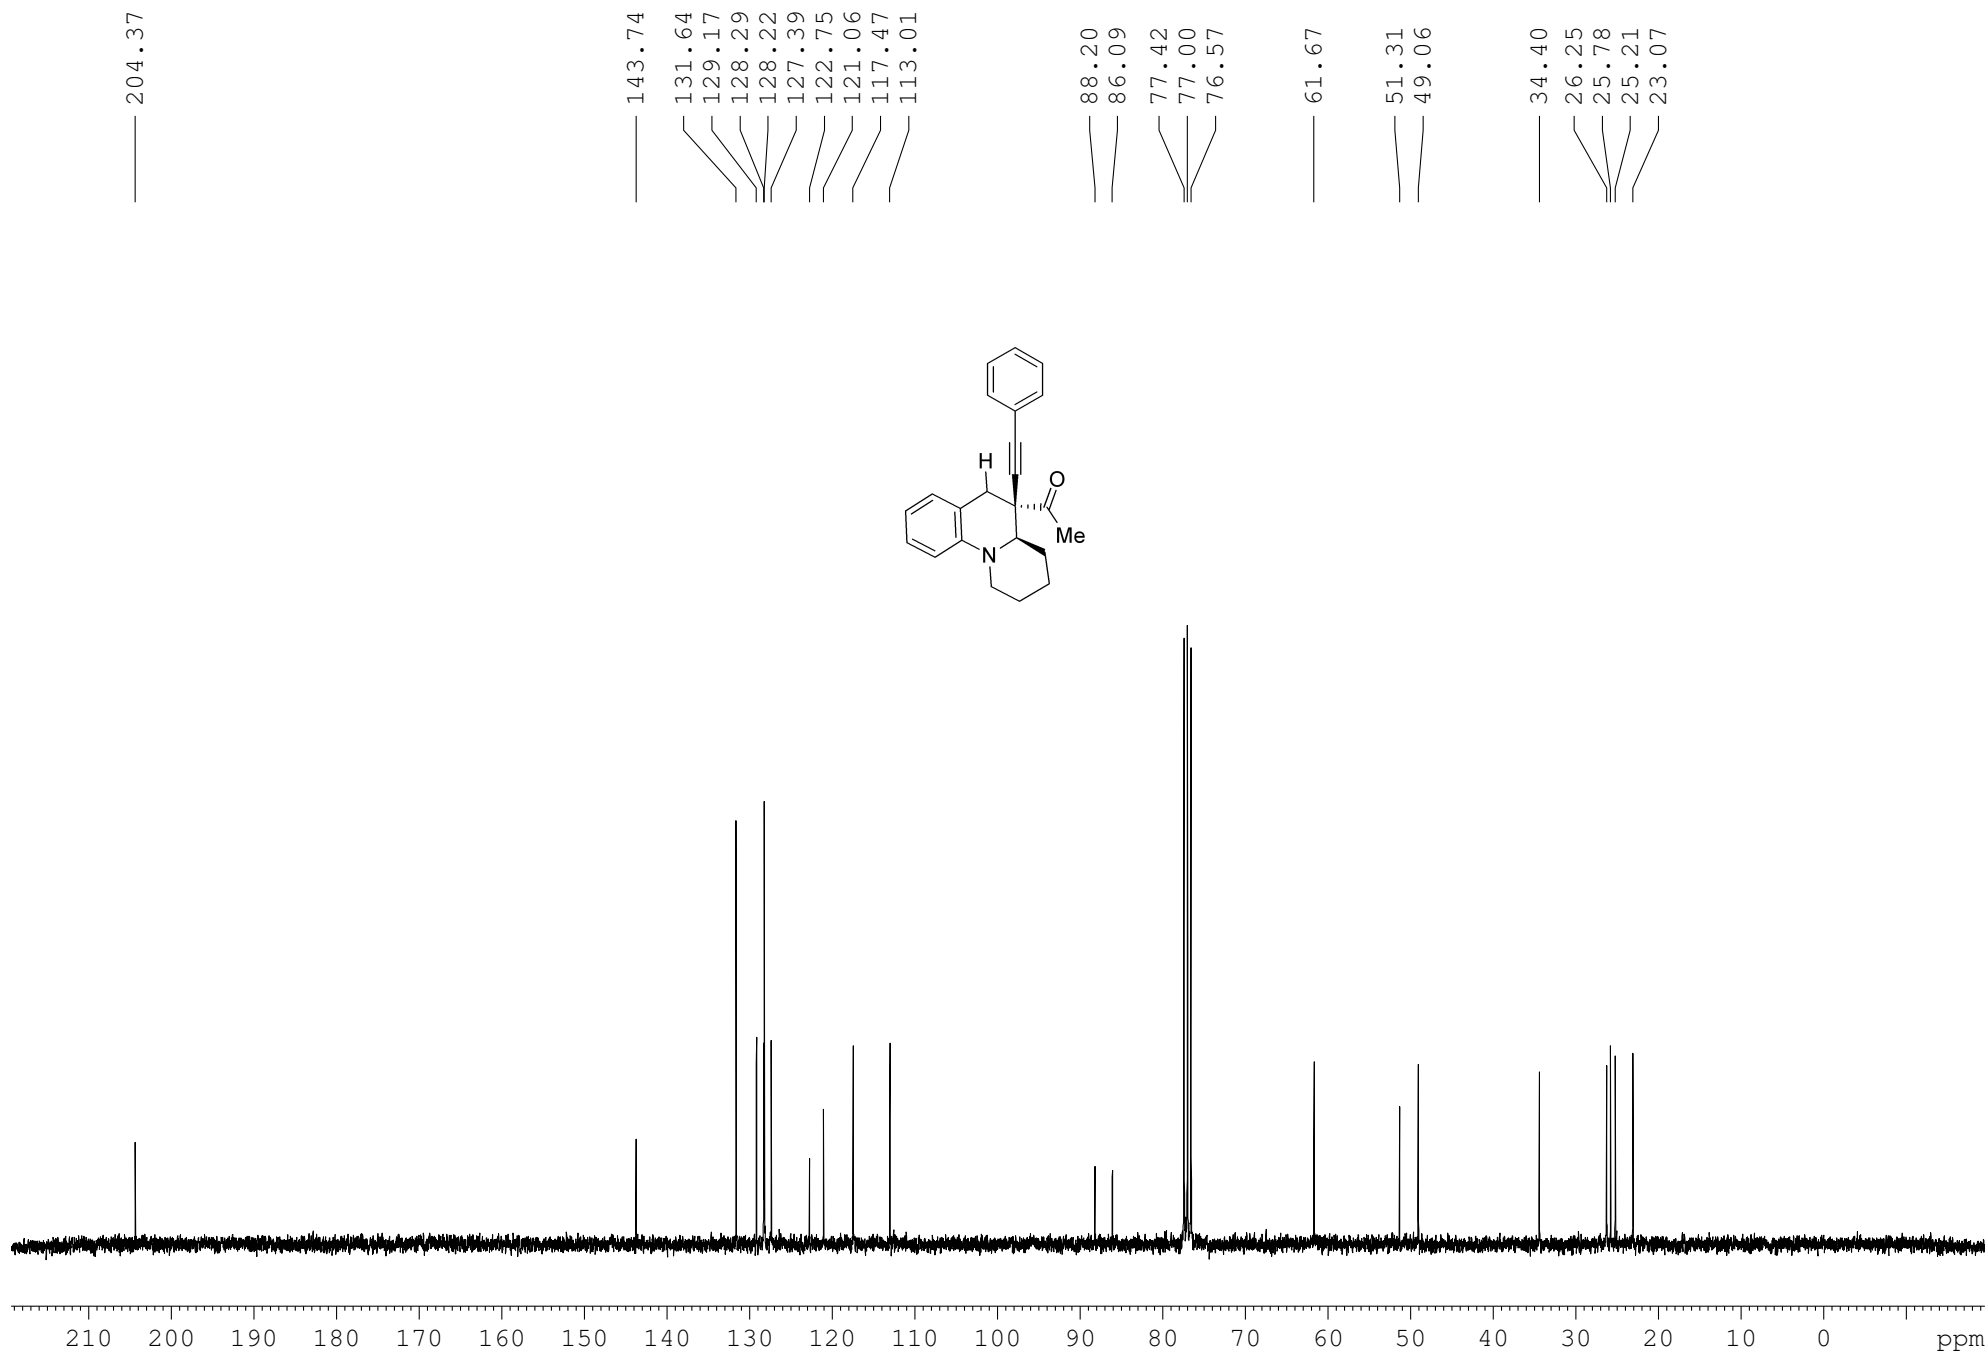

7.272  
7.248  
7.104  
7.077  
7.050  
7.027  
6.789  
6.761  
6.702  
6.677  
6.653

4.060  
4.014  
3.699  
3.664  
3.367  
3.314  
3.025  
2.972  
2.925  
2.889  
2.432  
2.333  
1.948  
1.909  
1.702  
1.690  
1.664  
1.633  
1.599  
1.566  
1.556  
1.519

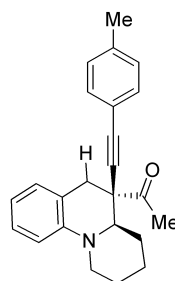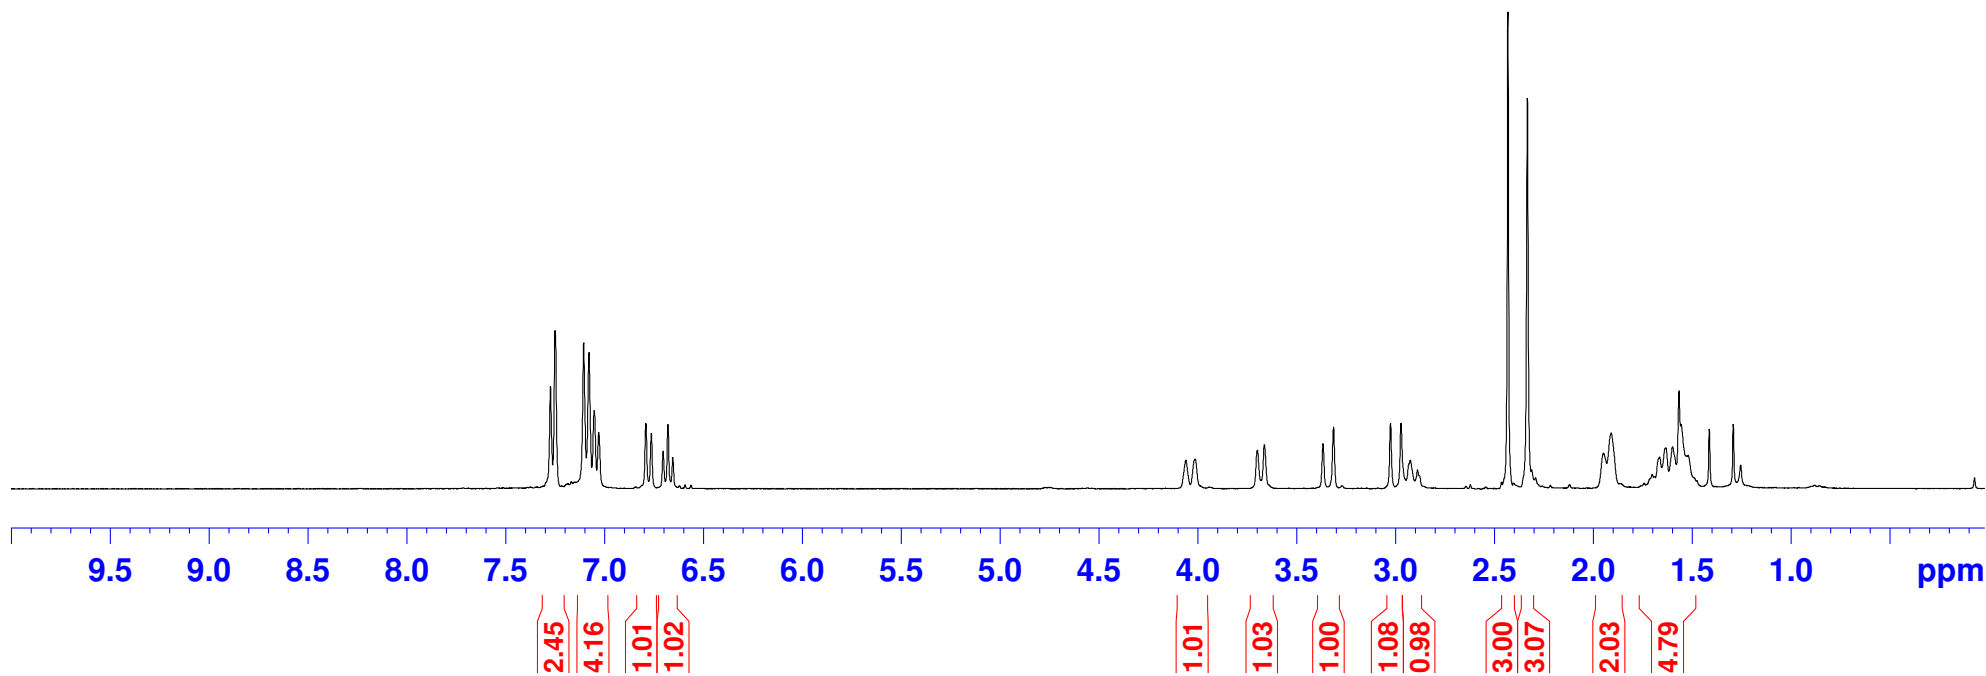

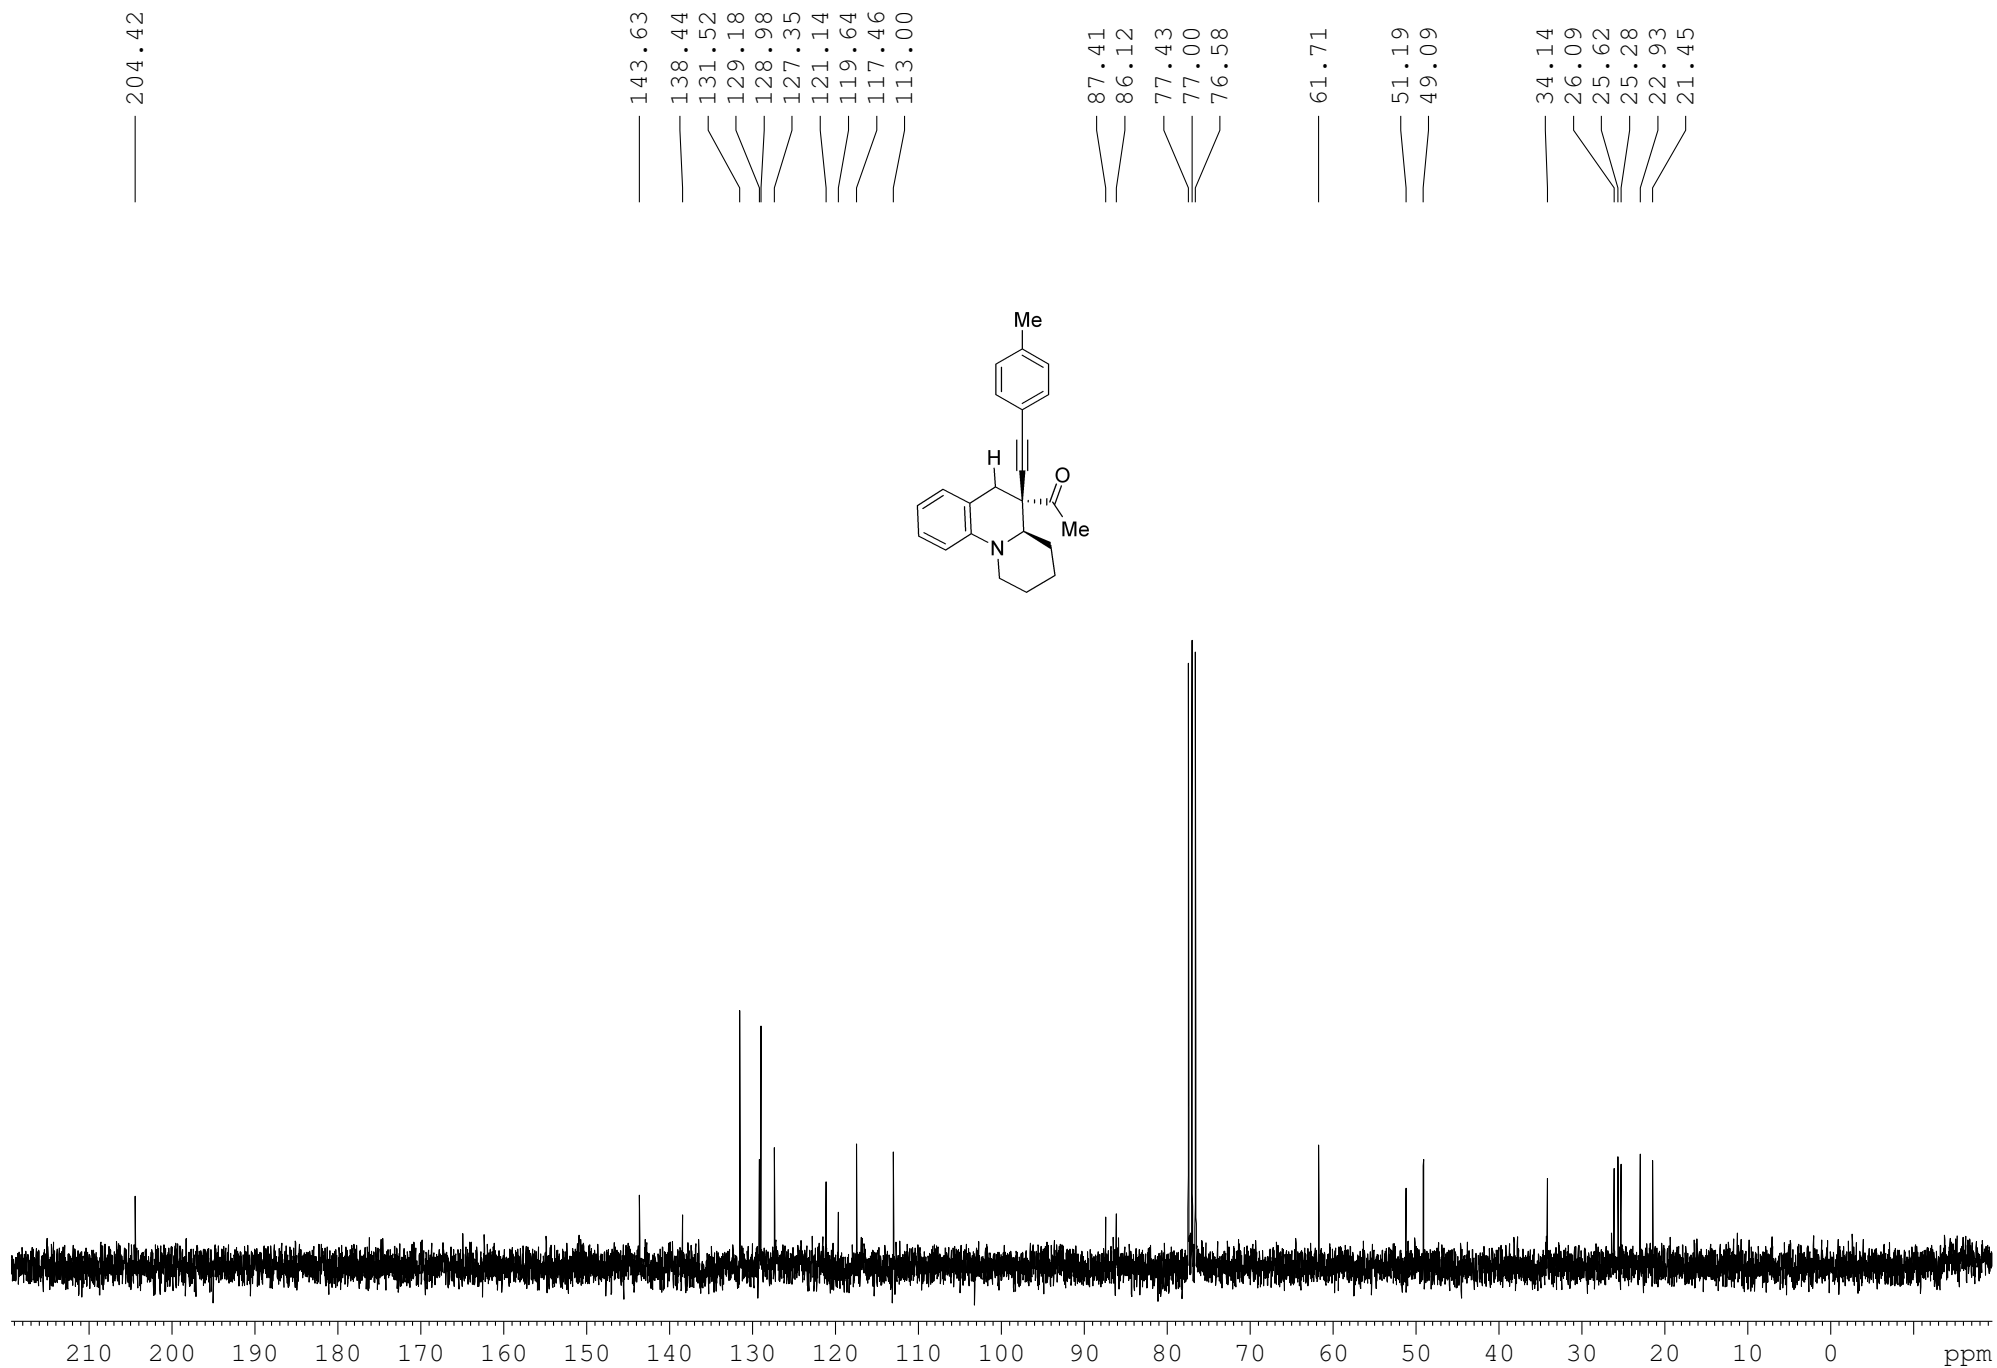

7.437  
7.425  
7.414  
7.336  
7.329  
7.318  
7.260  
7.235  
7.131  
7.104  
7.078  
7.054  
6.765  
6.738  
6.691  
6.666  
6.641  
6.617  
6.596  
6.568  
4.055  
4.004  
3.972  
3.925  
3.896  
3.846  
3.833  
3.820  
3.796  
3.782  
3.498  
3.477  
3.464  
3.448  
3.424  
3.404  
3.367  
3.348  
3.255  
3.246  
3.217  
3.161  
2.881  
2.825  
2.511  
2.292  
1.878  
1.839  
1.820  
1.789  
1.761  
1.740  
1.726  
1.577  
1.564  
1.533  
1.493  
1.271

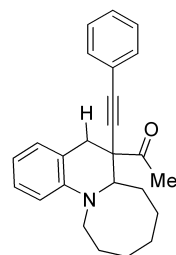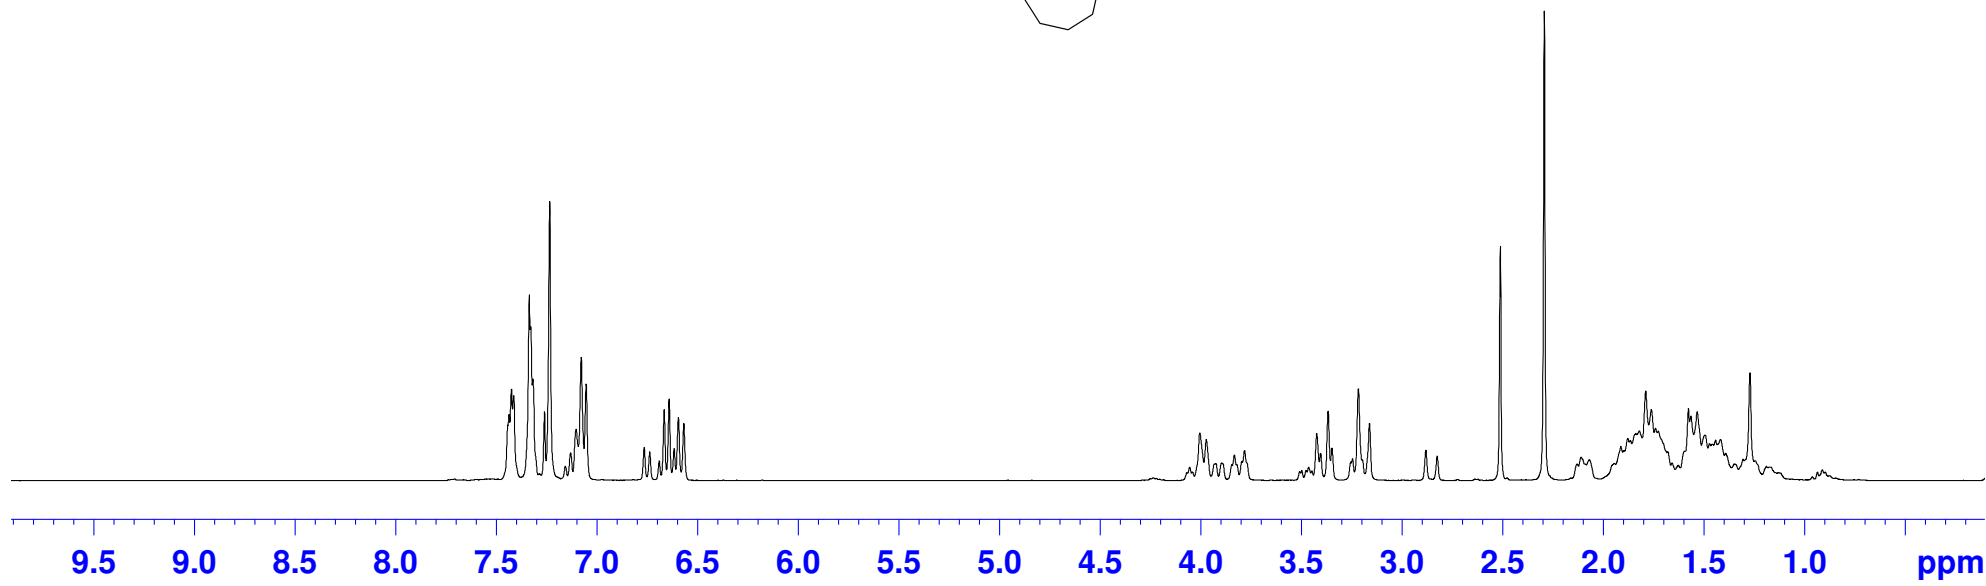

1.34  
2.04  
1.66  
2.09  
2.05  
2.03  
1.33  
1.34  
0.33  
1.00  
2.02  
10.49



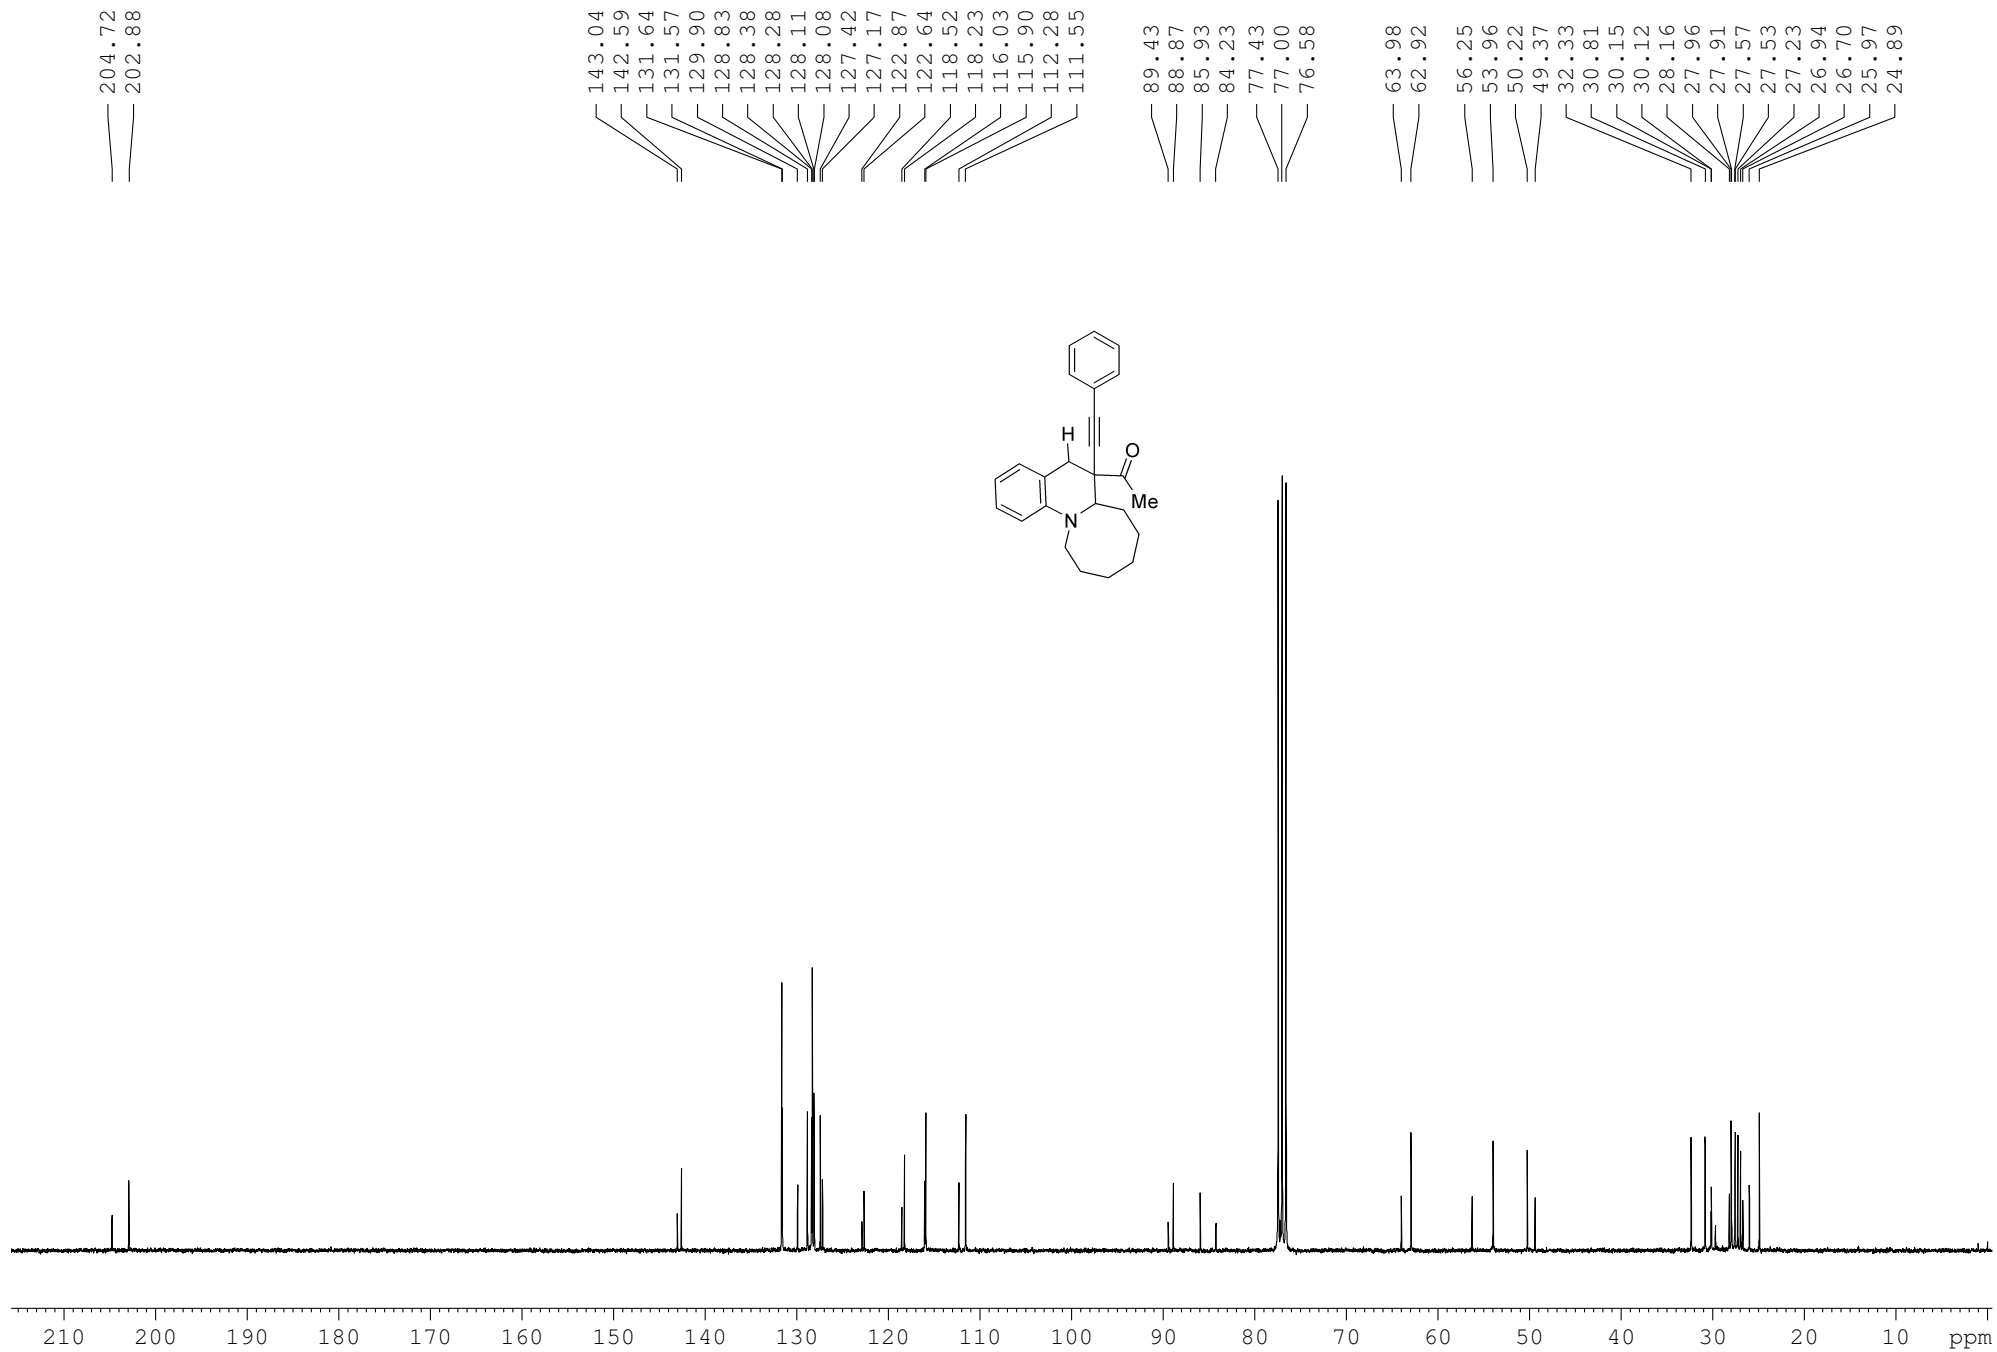

7.444  
7.437  
7.425  
7.412  
7.341  
7.333  
7.322  
7.260  
7.097  
7.077  
7.055  
6.685  
6.661  
6.637  
6.571  
6.542

4.086  
4.065  
4.044  
4.022  
3.465  
3.412  
3.389  
3.365  
3.333  
3.309  
3.284  
3.177  
3.122  
2.352

1.355  
1.334  
1.264  
1.240  
1.217

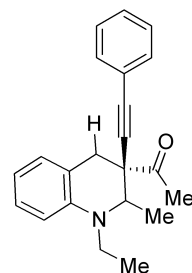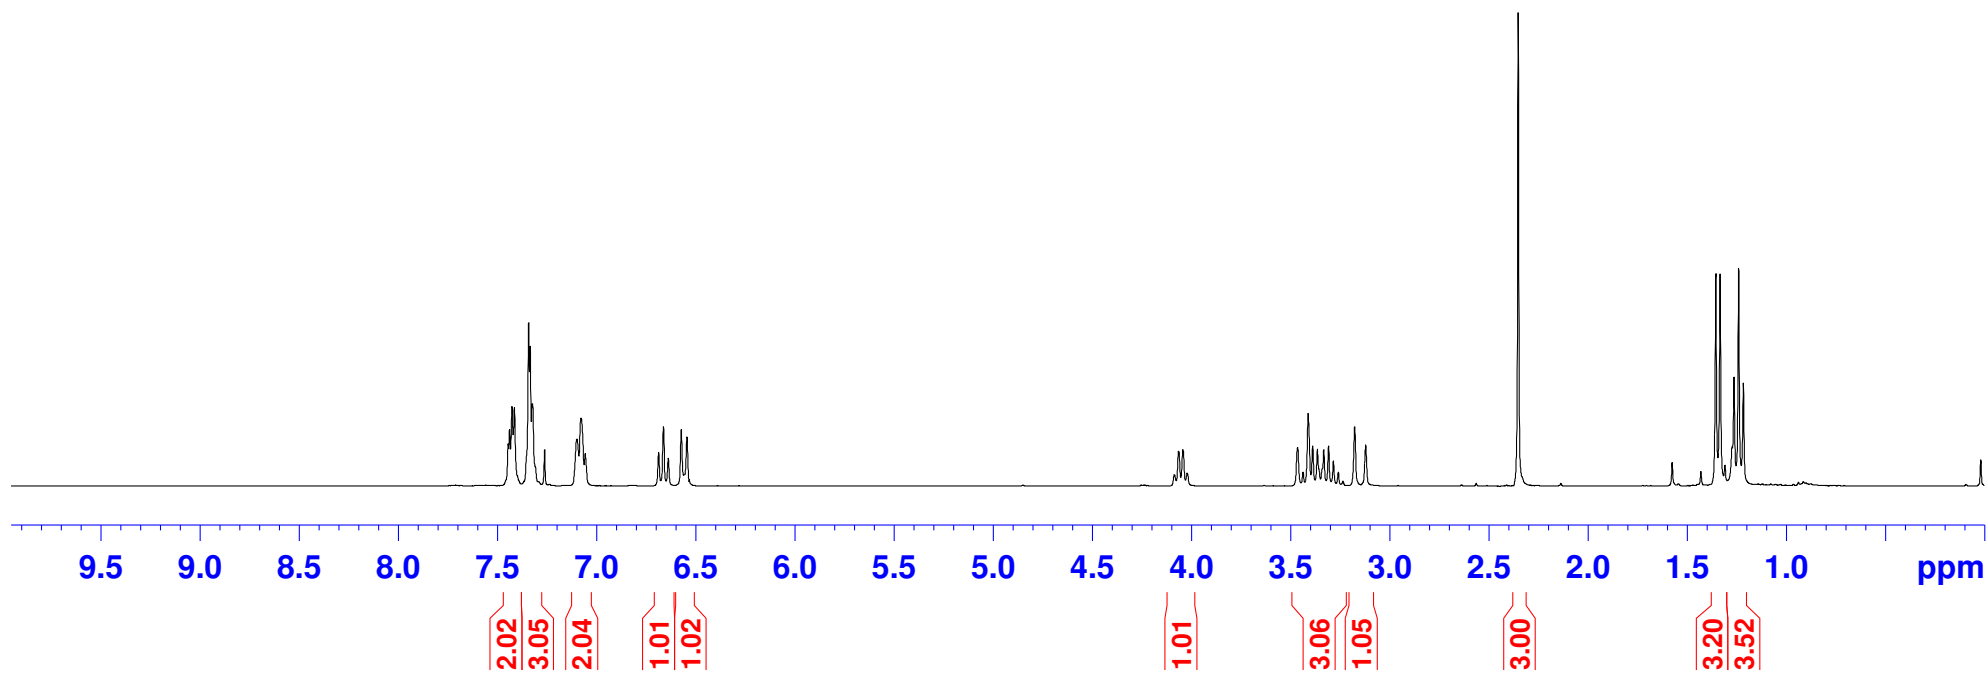

7.260  
7.247  
7.226  
7.133  
7.106  
7.093  
7.081  
7.069  
6.653  
6.627  
6.603

3.904  
3.899  
3.882  
3.877  
3.860  
3.855  
3.838  
3.834  
3.723  
3.700  
3.676  
3.650  
3.627  
3.604  
3.427  
3.371  
3.356  
3.332  
3.306  
3.282  
2.896  
2.841  
2.503  
1.319  
1.296  
1.272  
0.960  
0.938

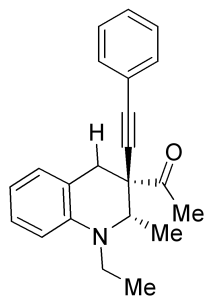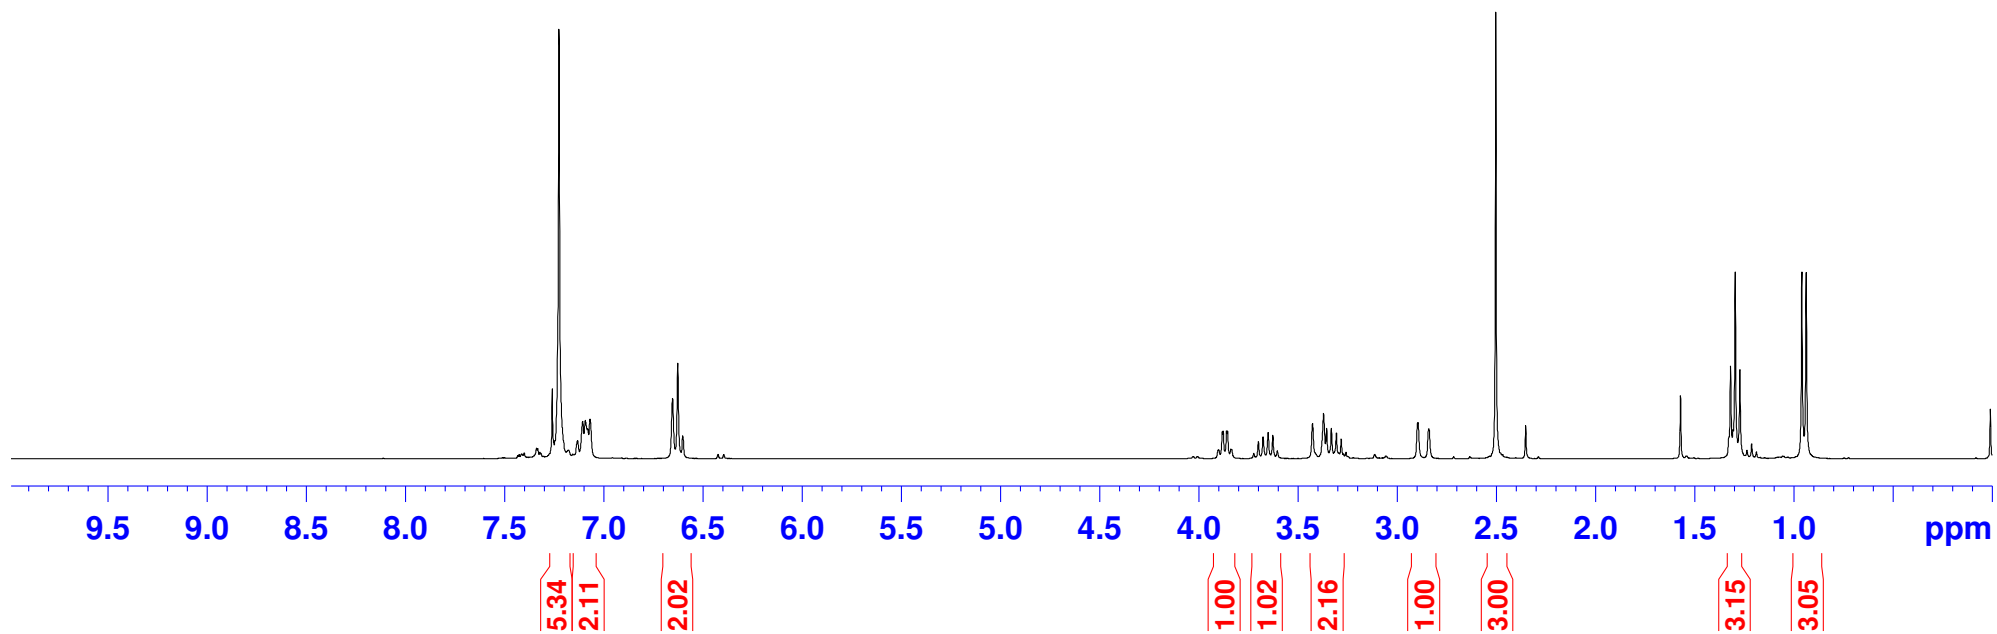

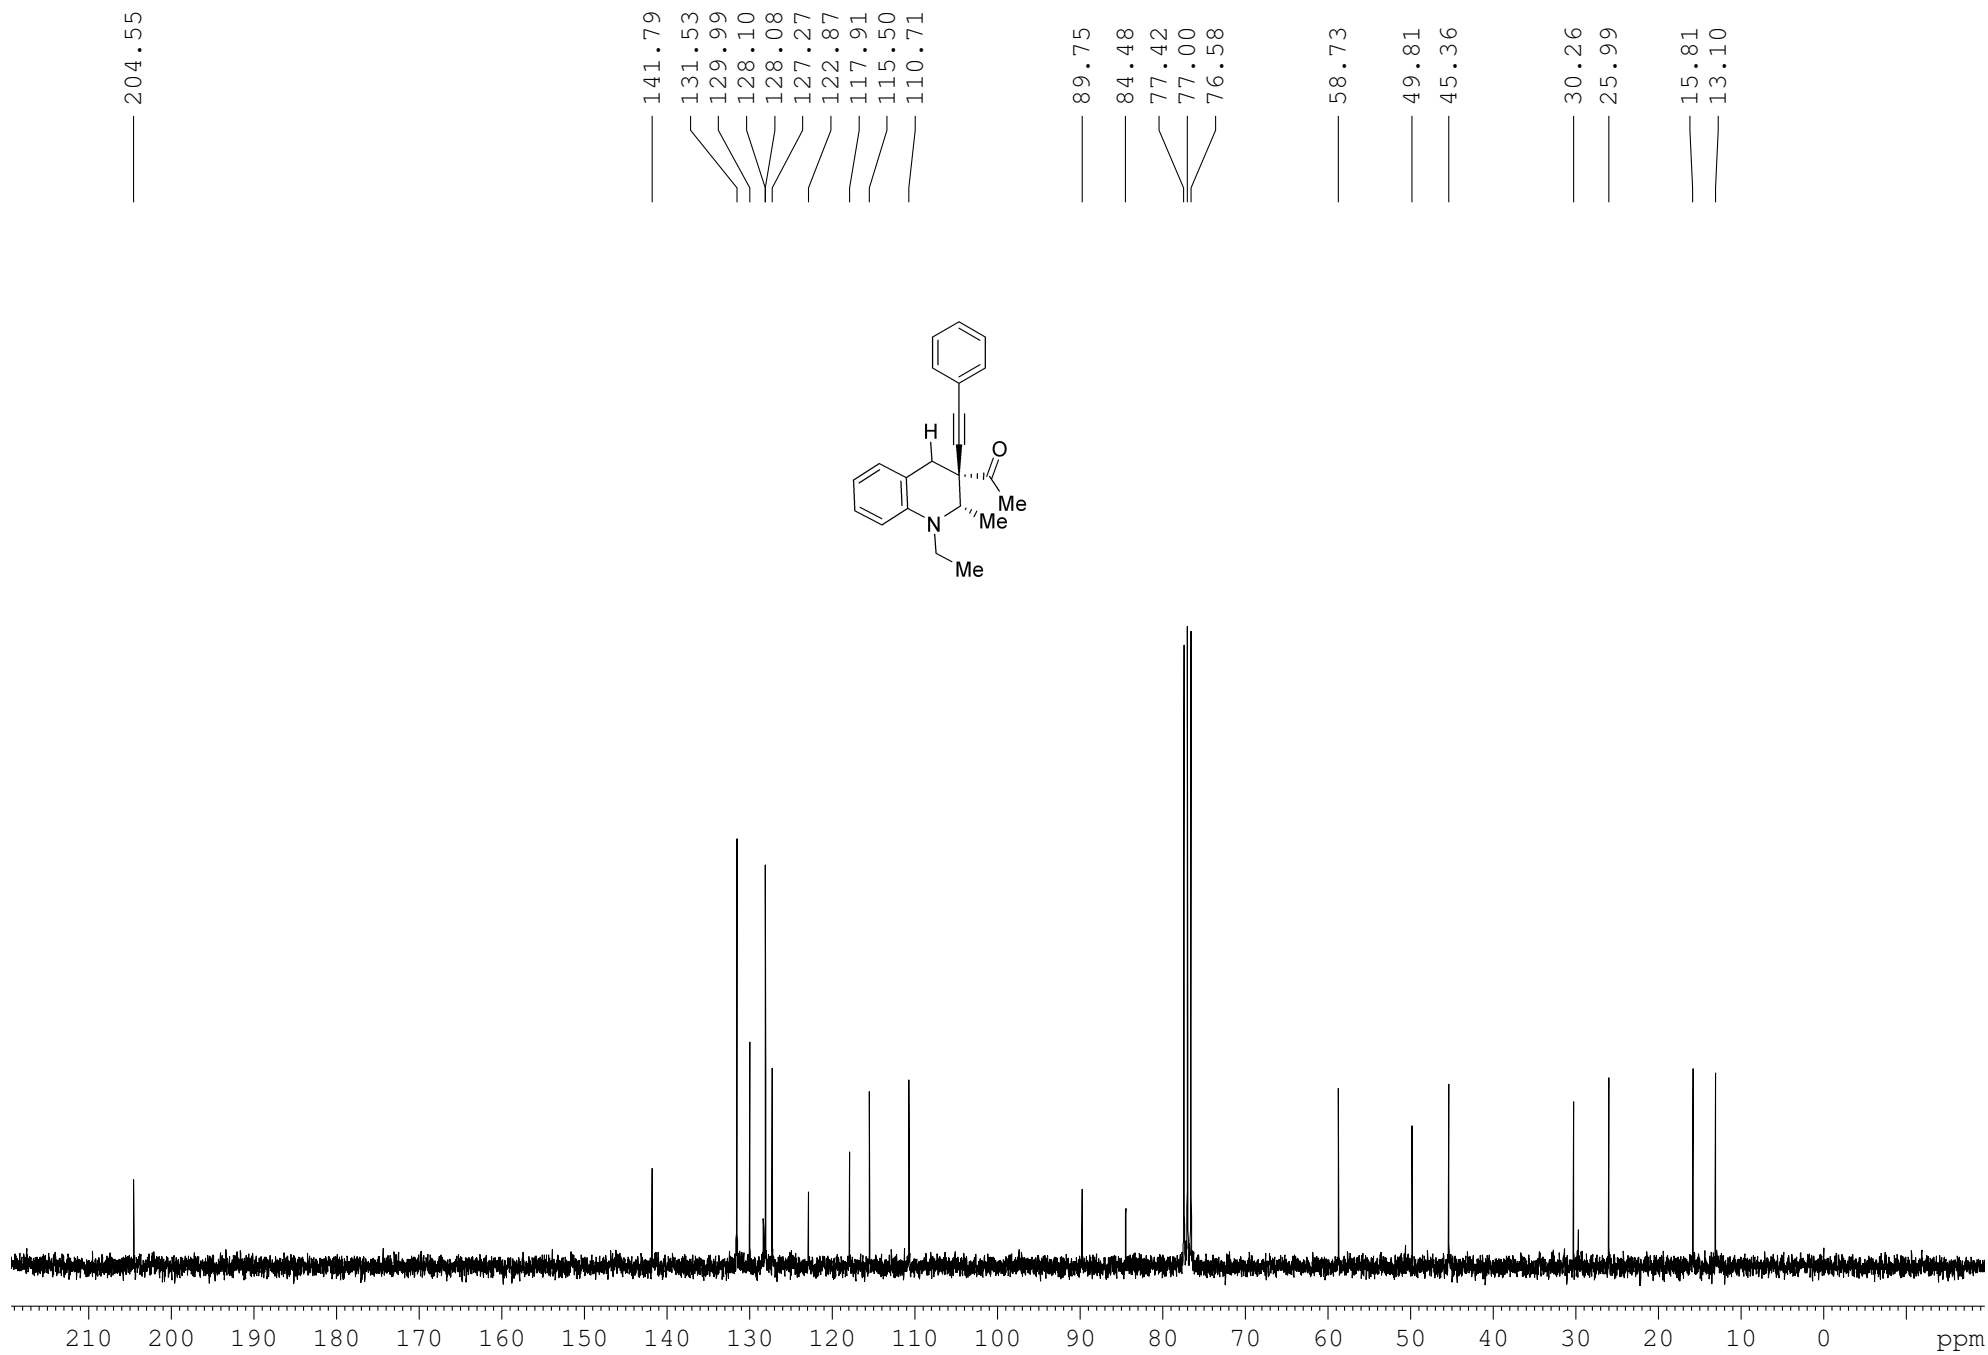

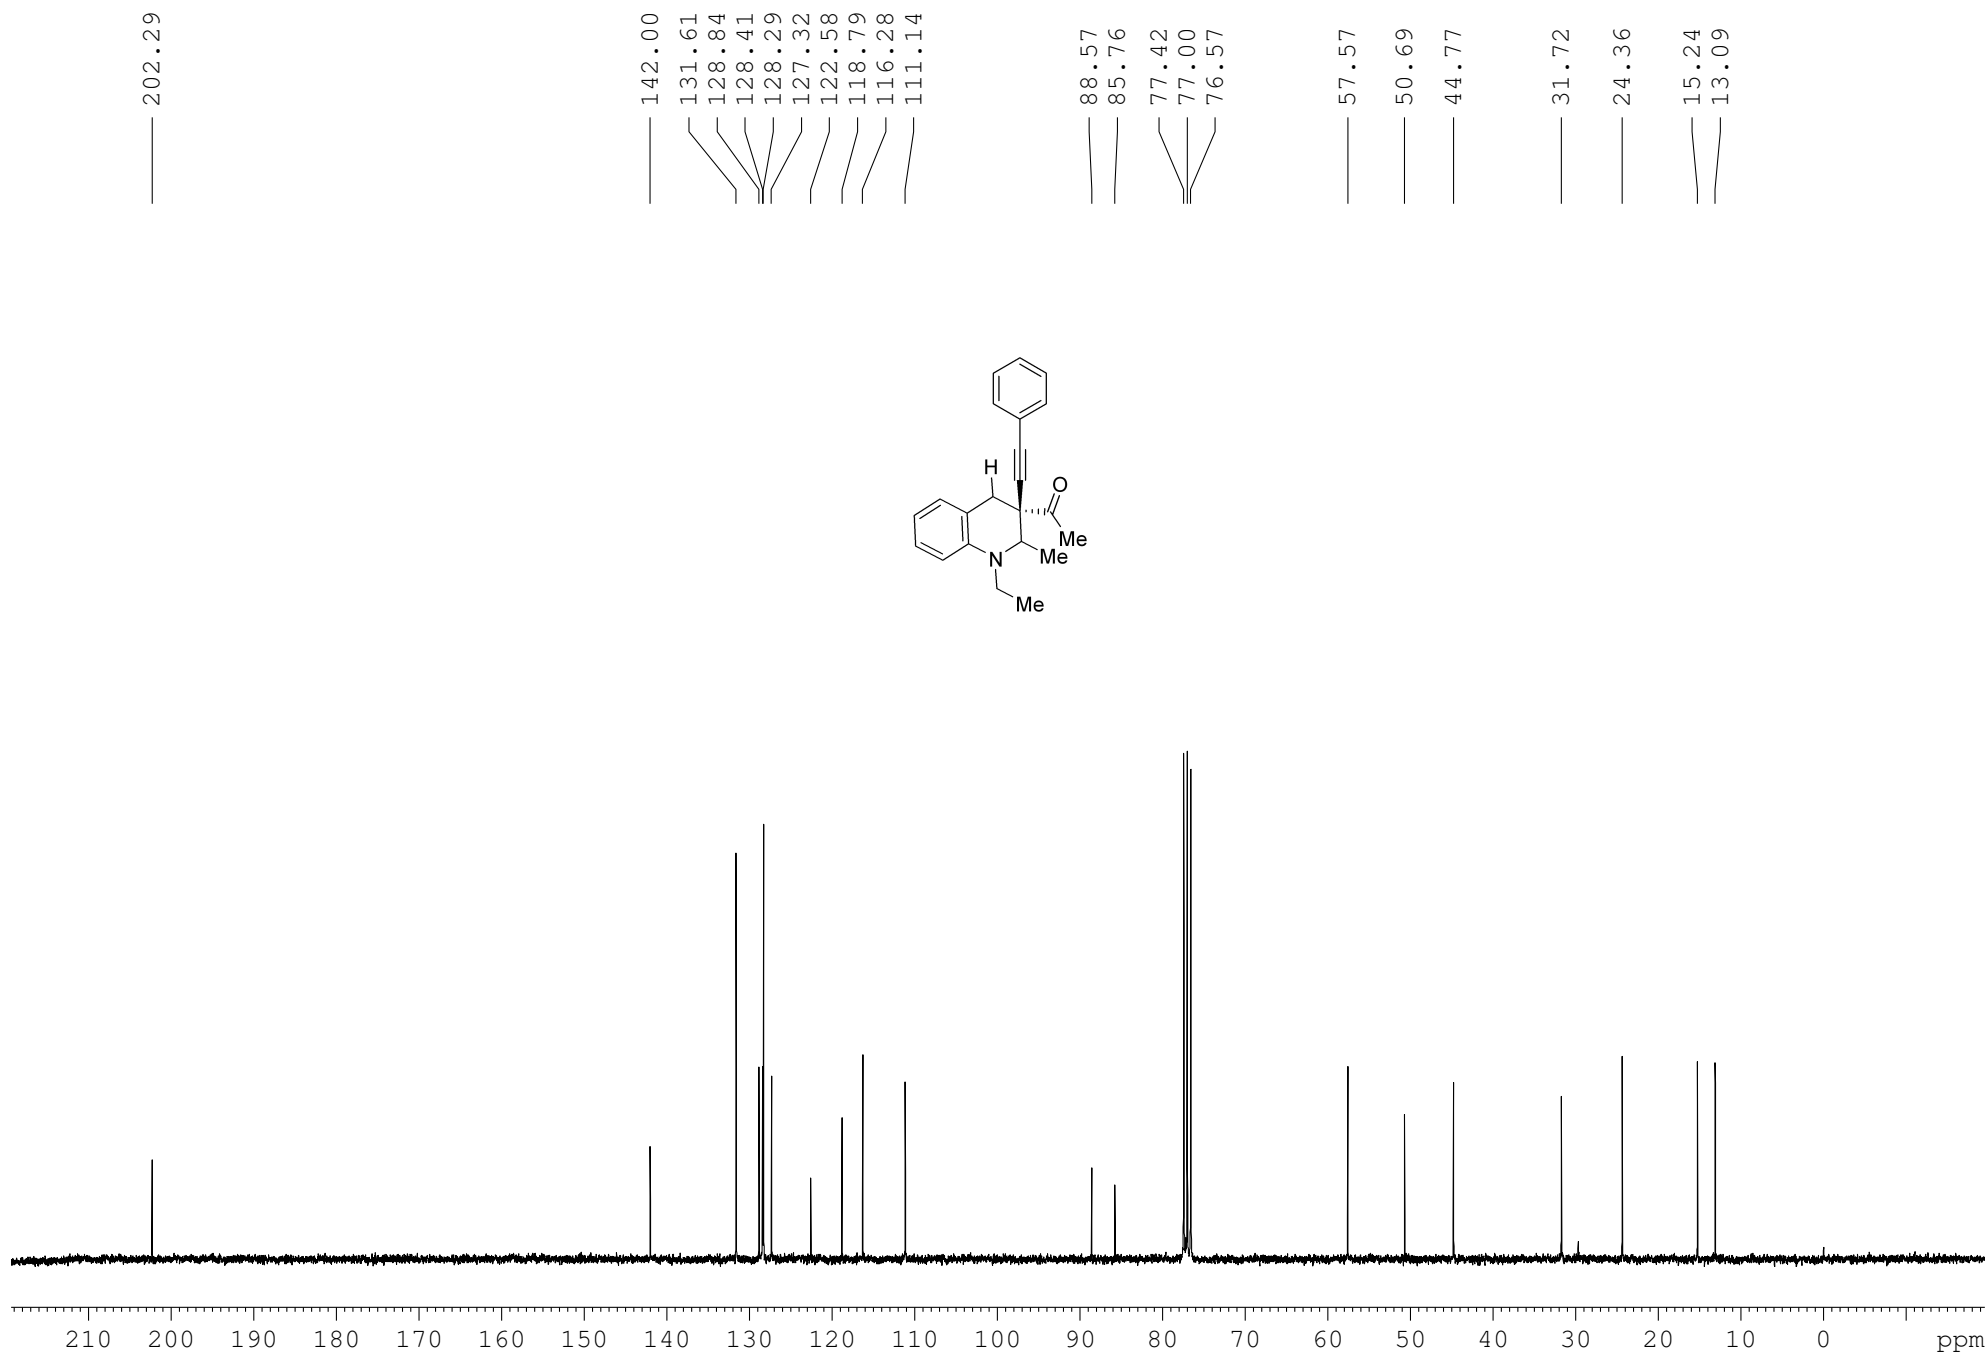

7.344  
7.338  
7.327  
7.321  
7.311  
7.292  
7.286  
7.273  
7.268  
7.261  
7.249  
6.905  
6.902  
6.882  
6.855  
6.848  
6.843  
6.821

4.006  
3.979  
3.944  
3.935  
3.715  
3.706  
3.680  
3.670  
3.644  
3.627  
3.615  
3.580  
3.153  
3.142  
3.116  
3.103  
3.075  
2.987  
2.936  
2.506

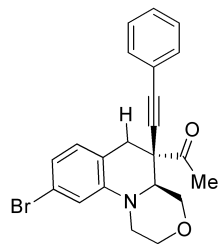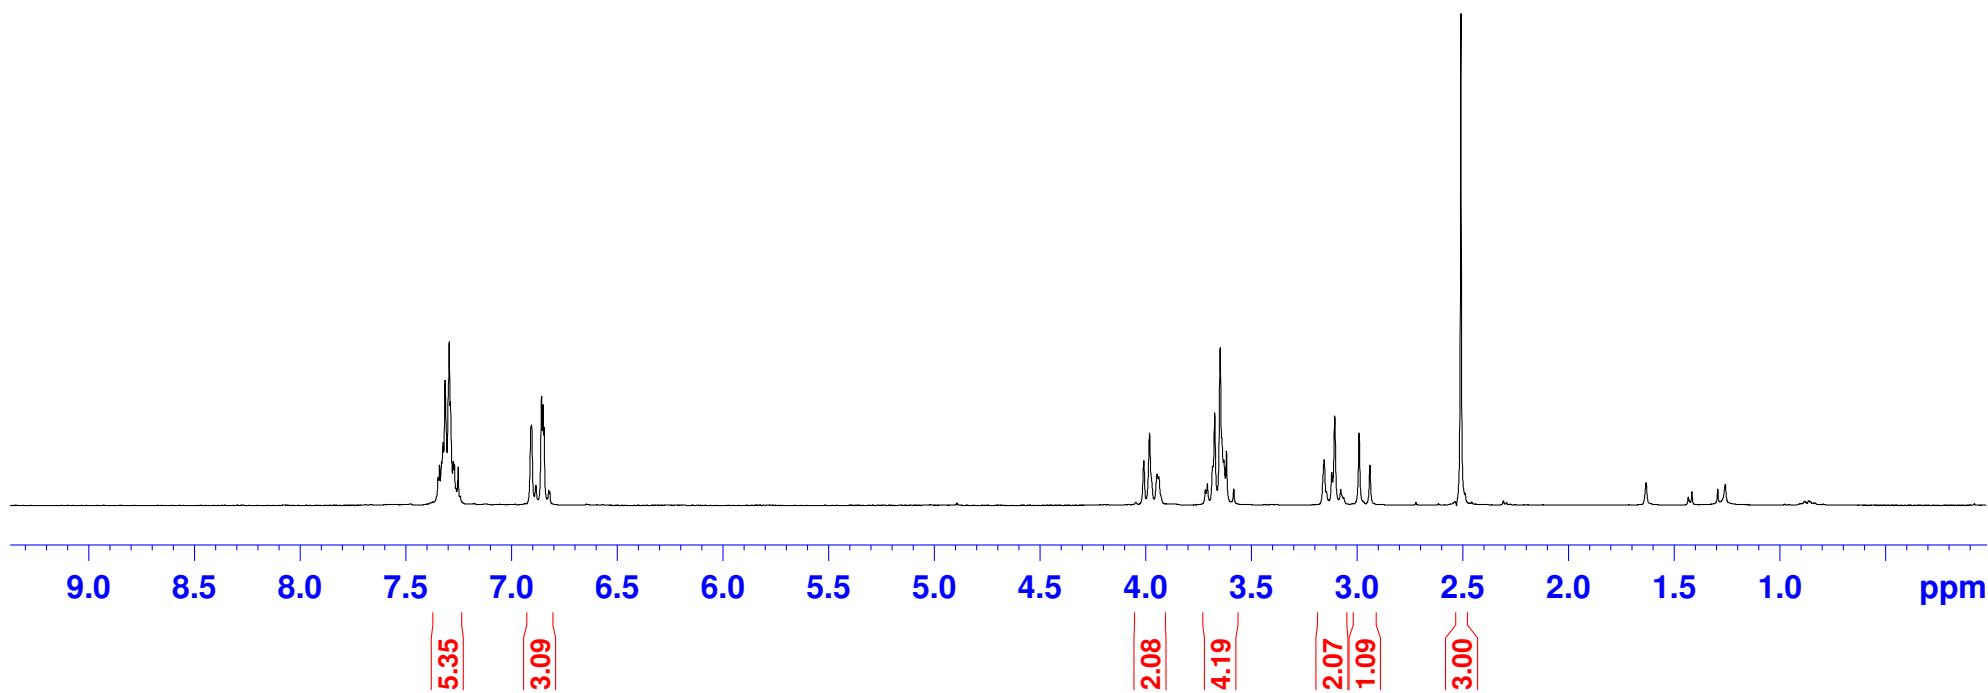

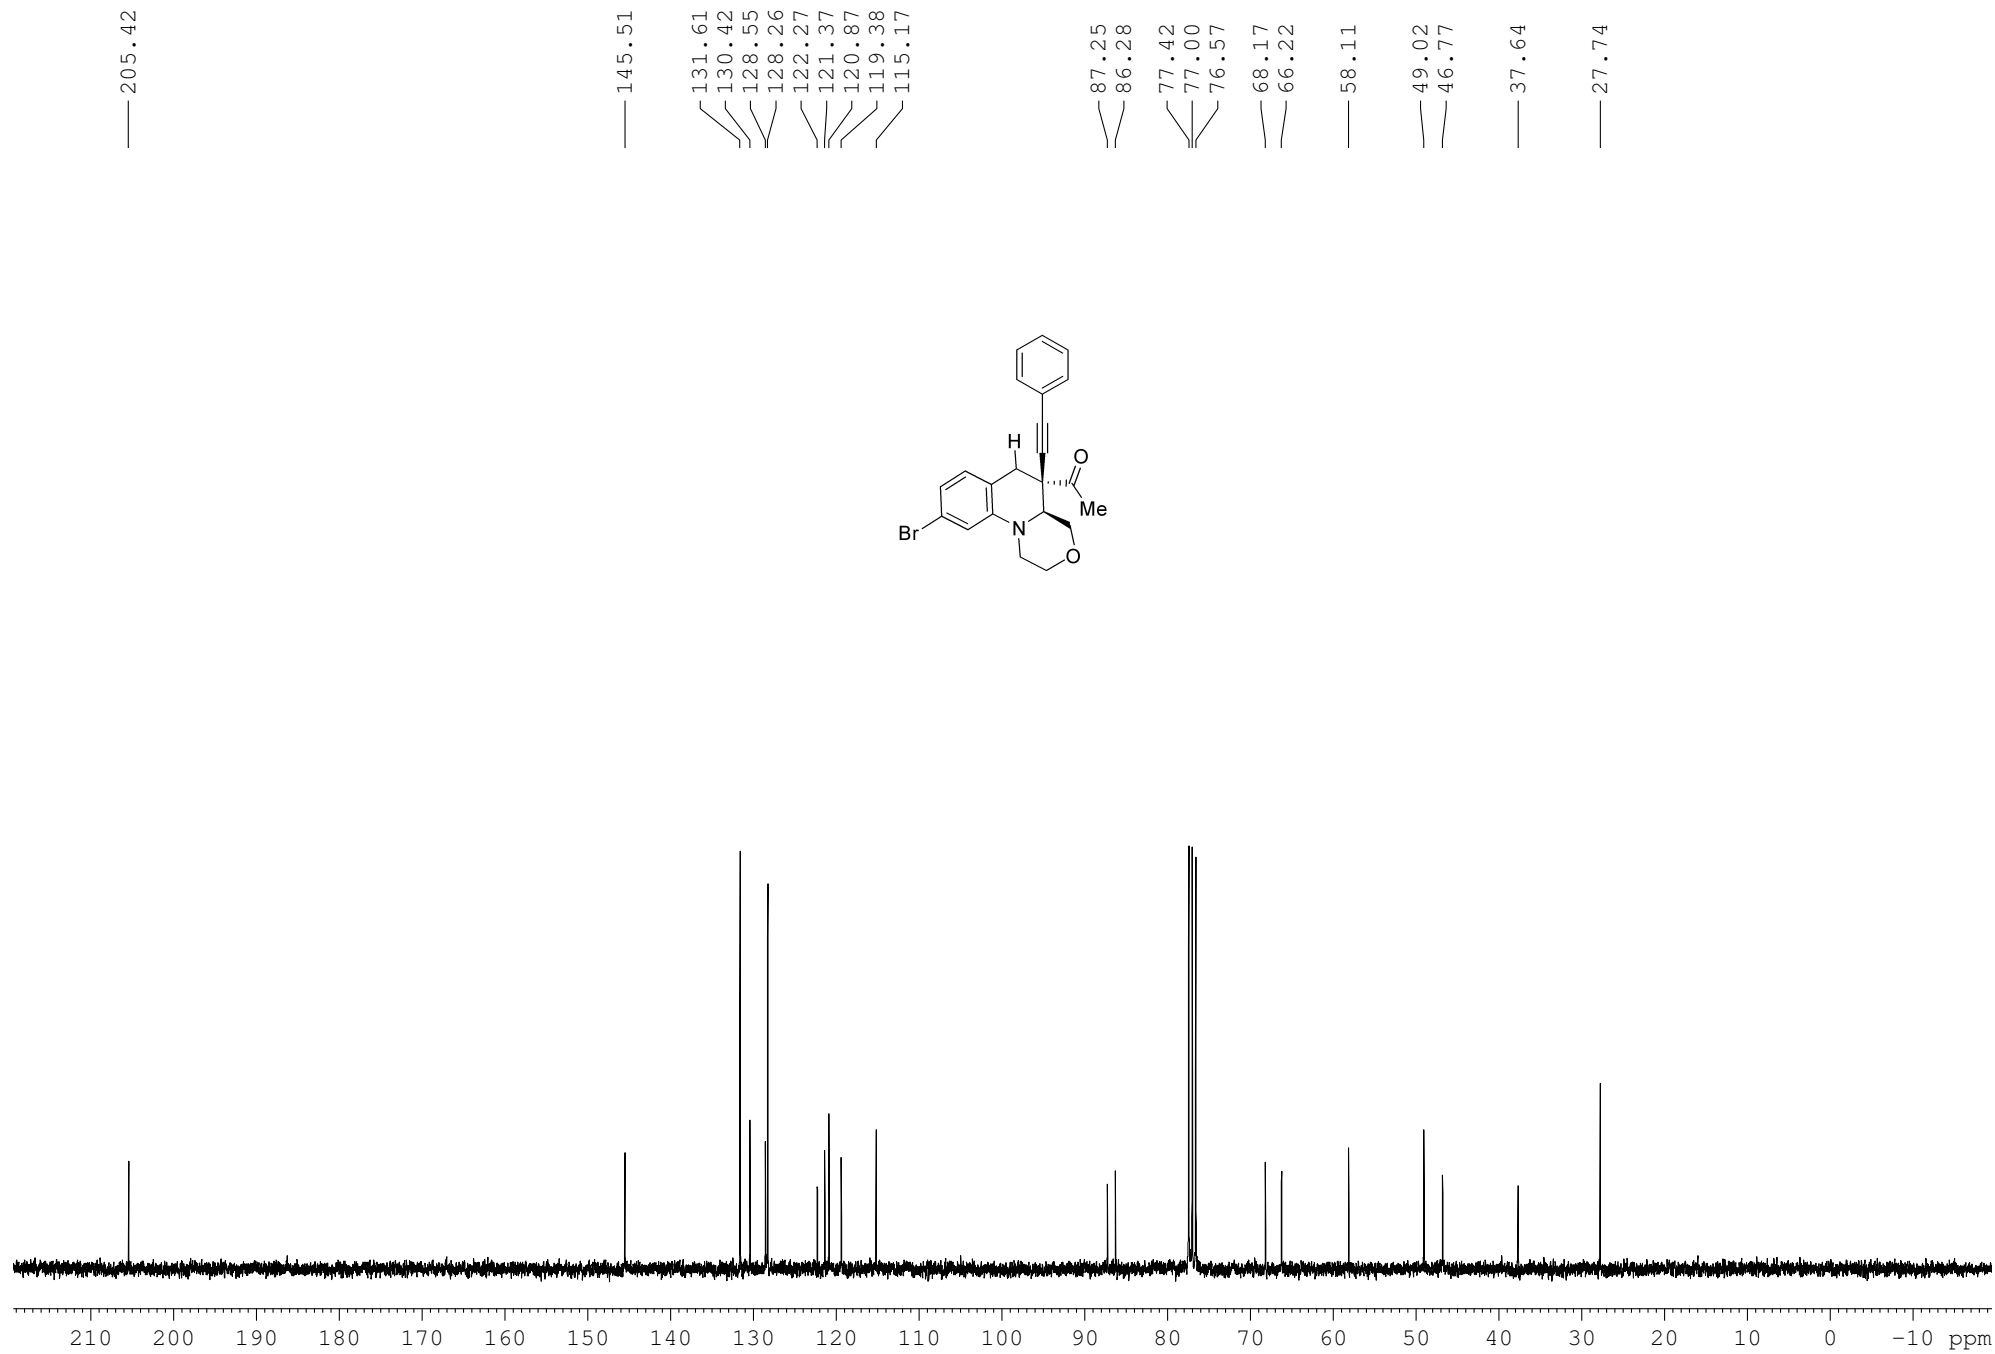

7.599  
7.573  
7.390  
7.365  
7.339  
7.287  
7.260  
7.237  
7.213  
7.189  
7.177  
7.169  
7.151  
7.034  
7.009  
6.985  
4.455  
4.447  
4.423  
4.414  
4.297  
4.252  
4.054  
4.021  
3.908  
3.899  
3.870  
3.864  
3.834  
3.827  
3.797  
3.791  
3.616  
3.579  
3.545  
3.510  
3.501  
3.320  
3.275  
3.121  
3.083  
2.350

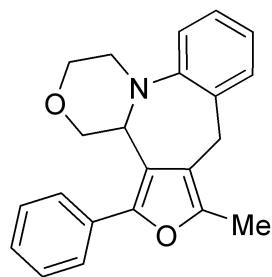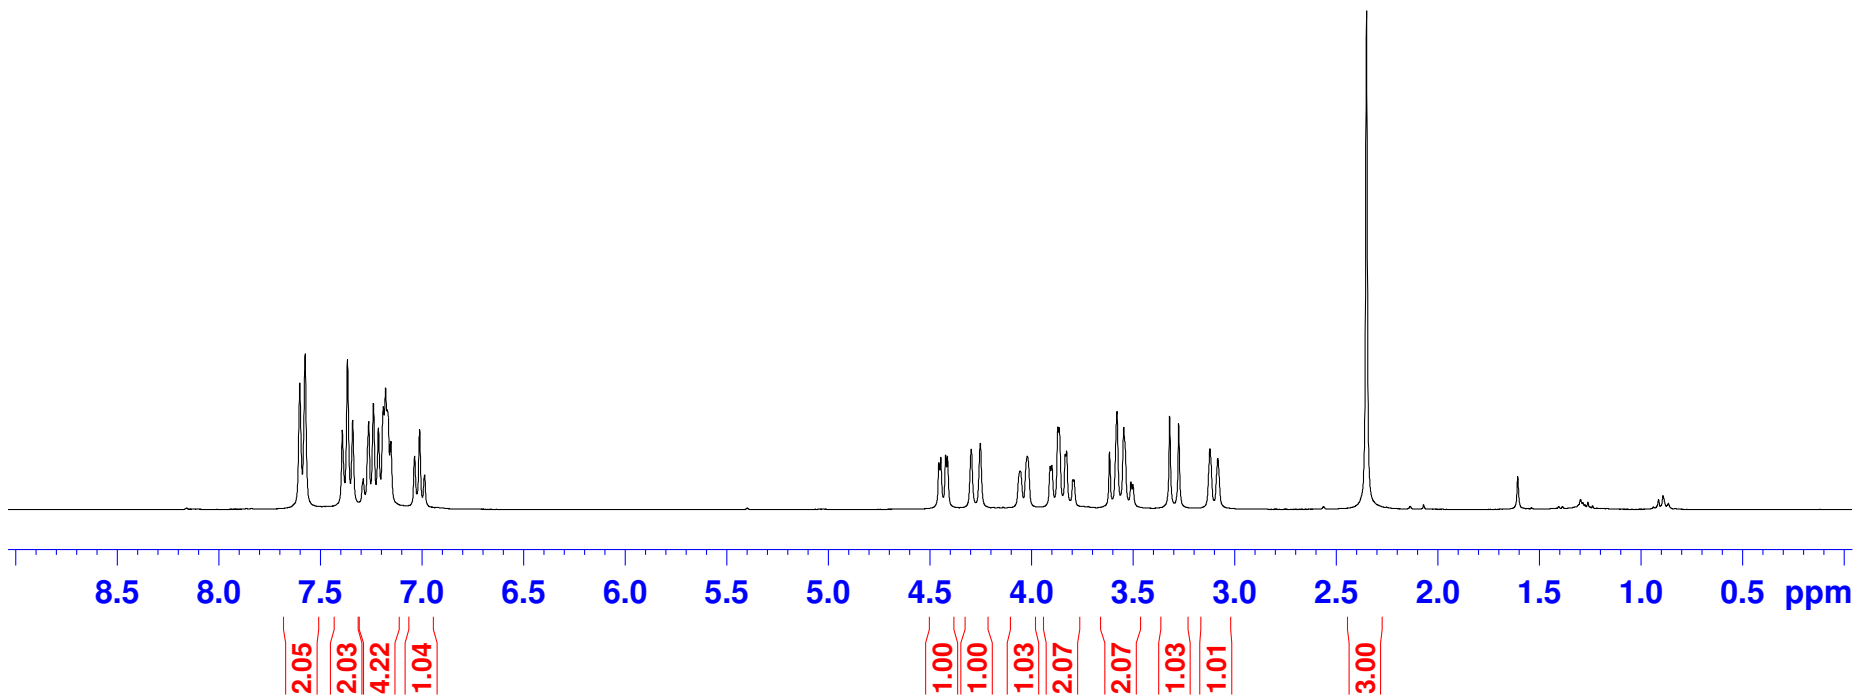



149.29  
146.15  
144.44  
139.32  
131.34  
128.61  
127.38  
126.94  
126.69  
124.85  
123.46  
119.98  
119.29  
117.80

77.43  
77.00  
76.58  
71.44  
67.62  
60.76  
51.84  
28.81  
11.28

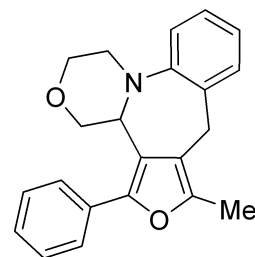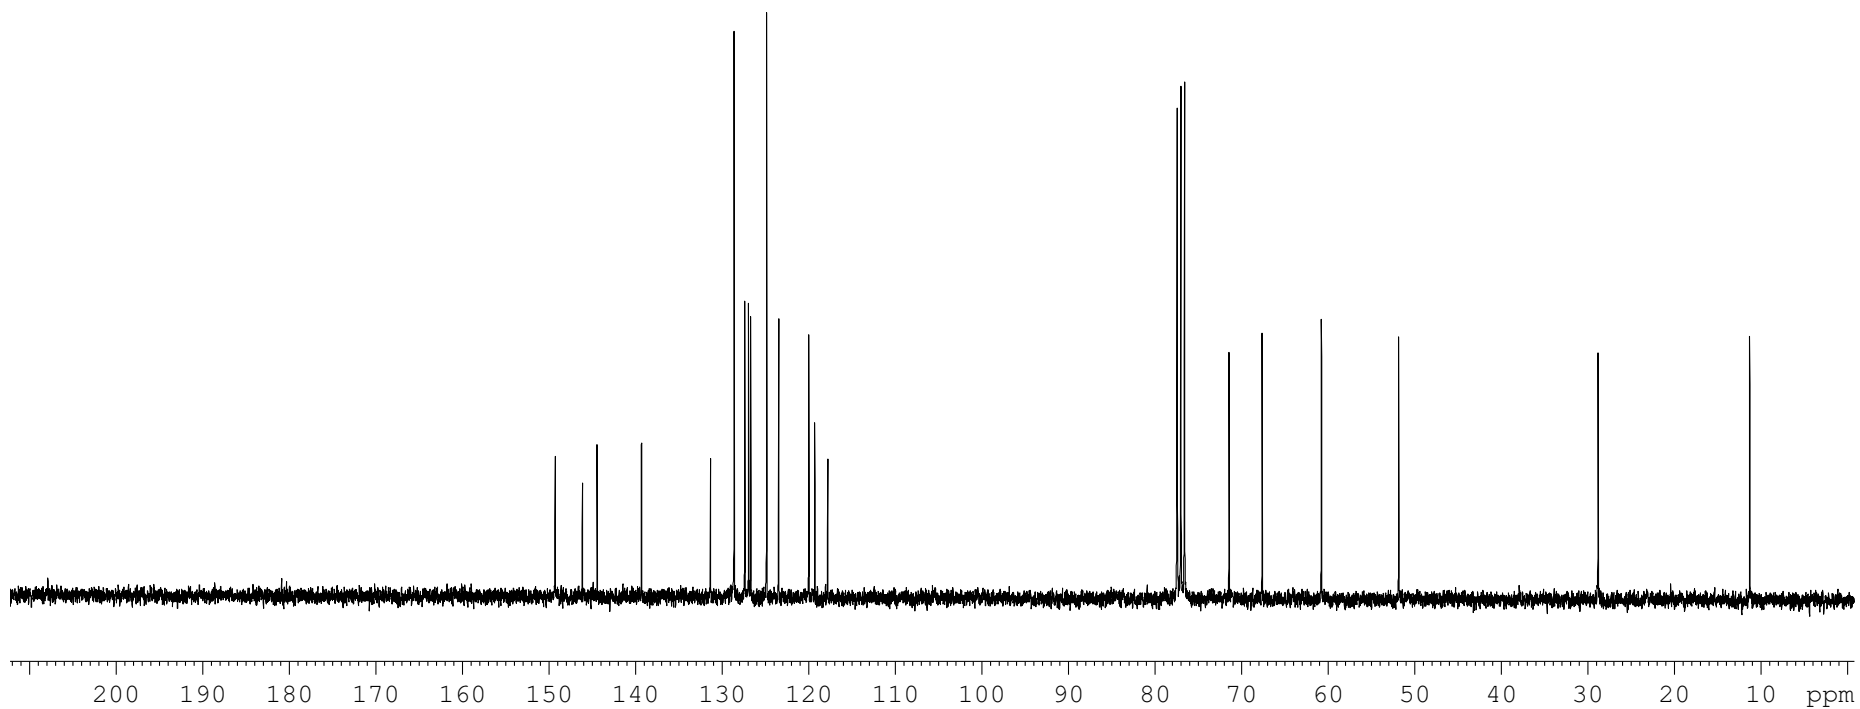

7.511  
7.485  
7.301  
7.277  
7.260  
7.252  
7.204  
7.178  
7.167  
7.050  
7.025  
7.001

4.455  
4.447  
4.422  
4.414  
4.306  
4.261  
4.067  
4.031  
3.922  
3.914  
3.881  
3.875  
3.844  
3.837  
3.807  
3.800  
3.620  
3.585  
3.558  
3.548  
3.520  
3.510  
3.333  
3.288  
3.128  
3.090  
2.363

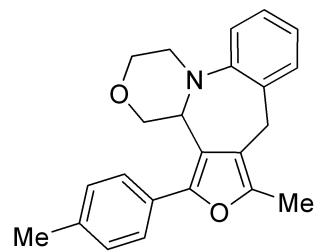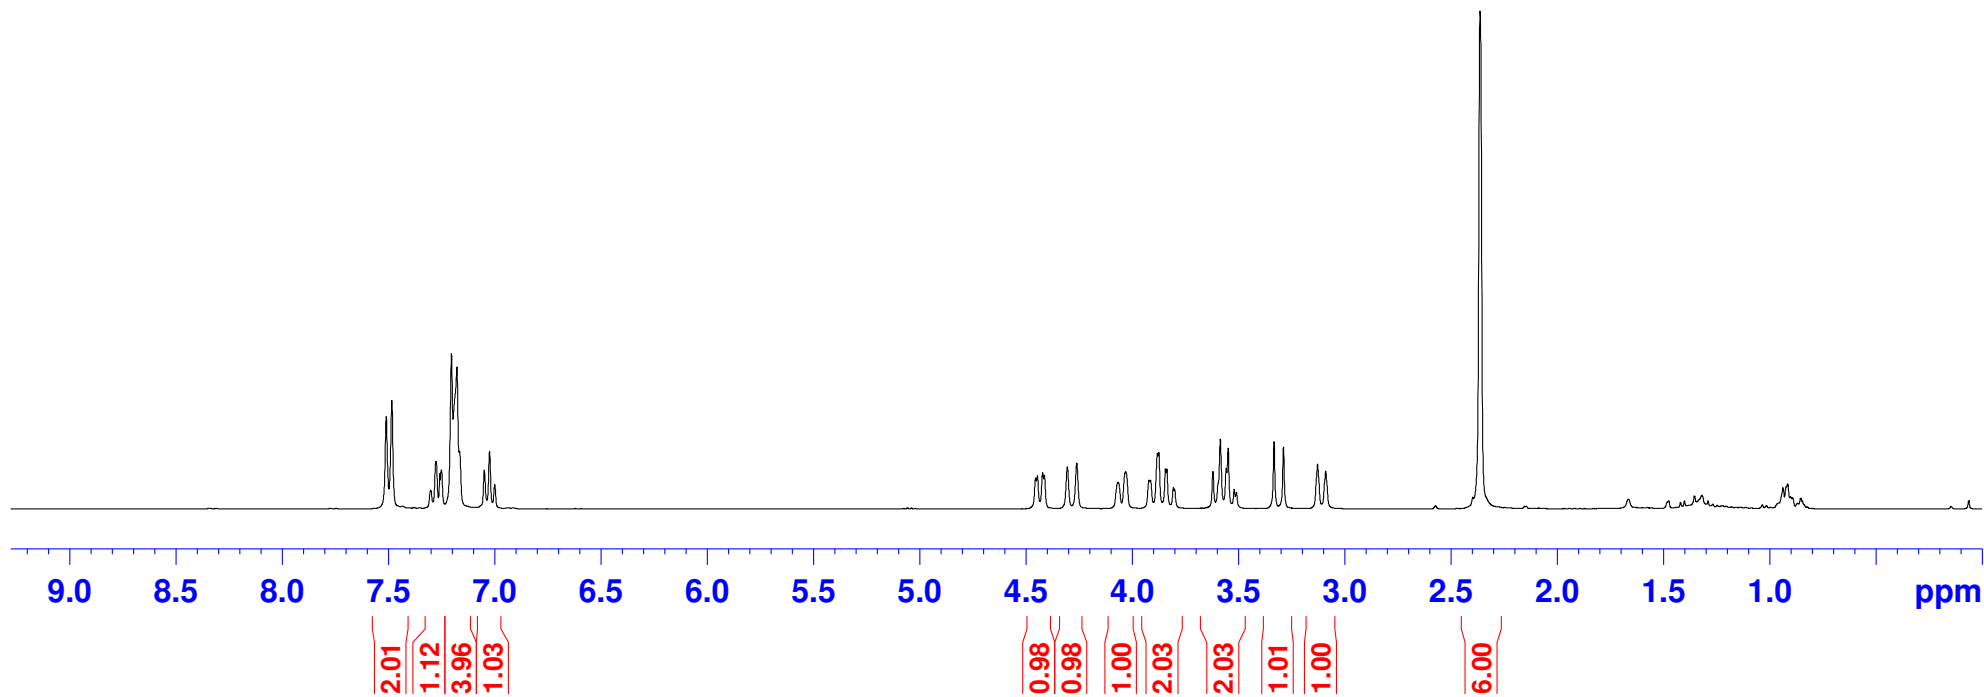

149.29  
146.34  
143.98  
139.30  
136.45  
129.29  
128.59  
127.32  
126.92  
124.80  
123.41  
119.94  
119.09  
116.98

77.42  
77.00  
76.58  
71.39  
67.58  
60.72  
51.81

28.80  
21.11  
11.25

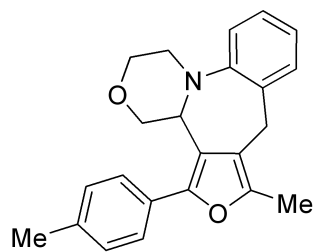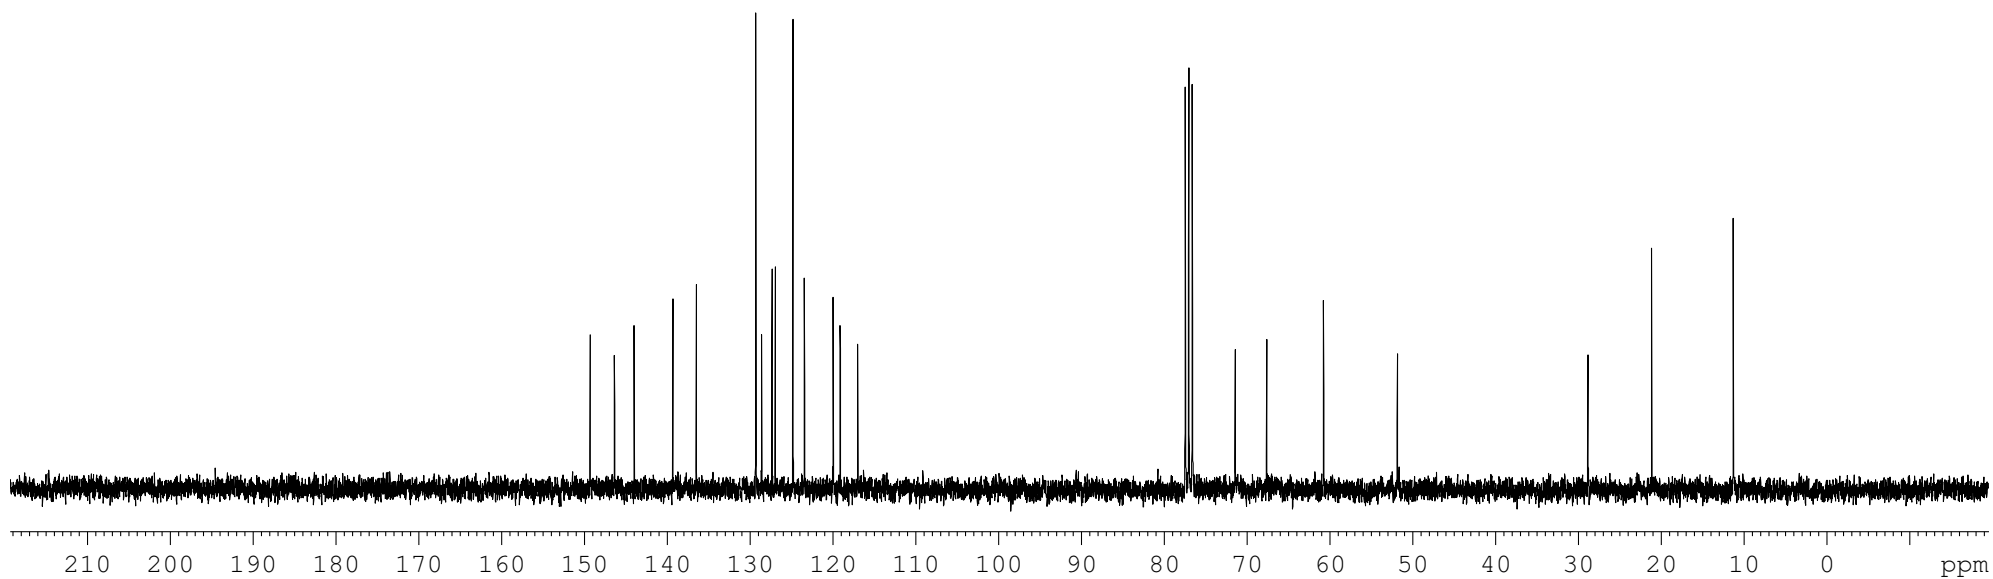

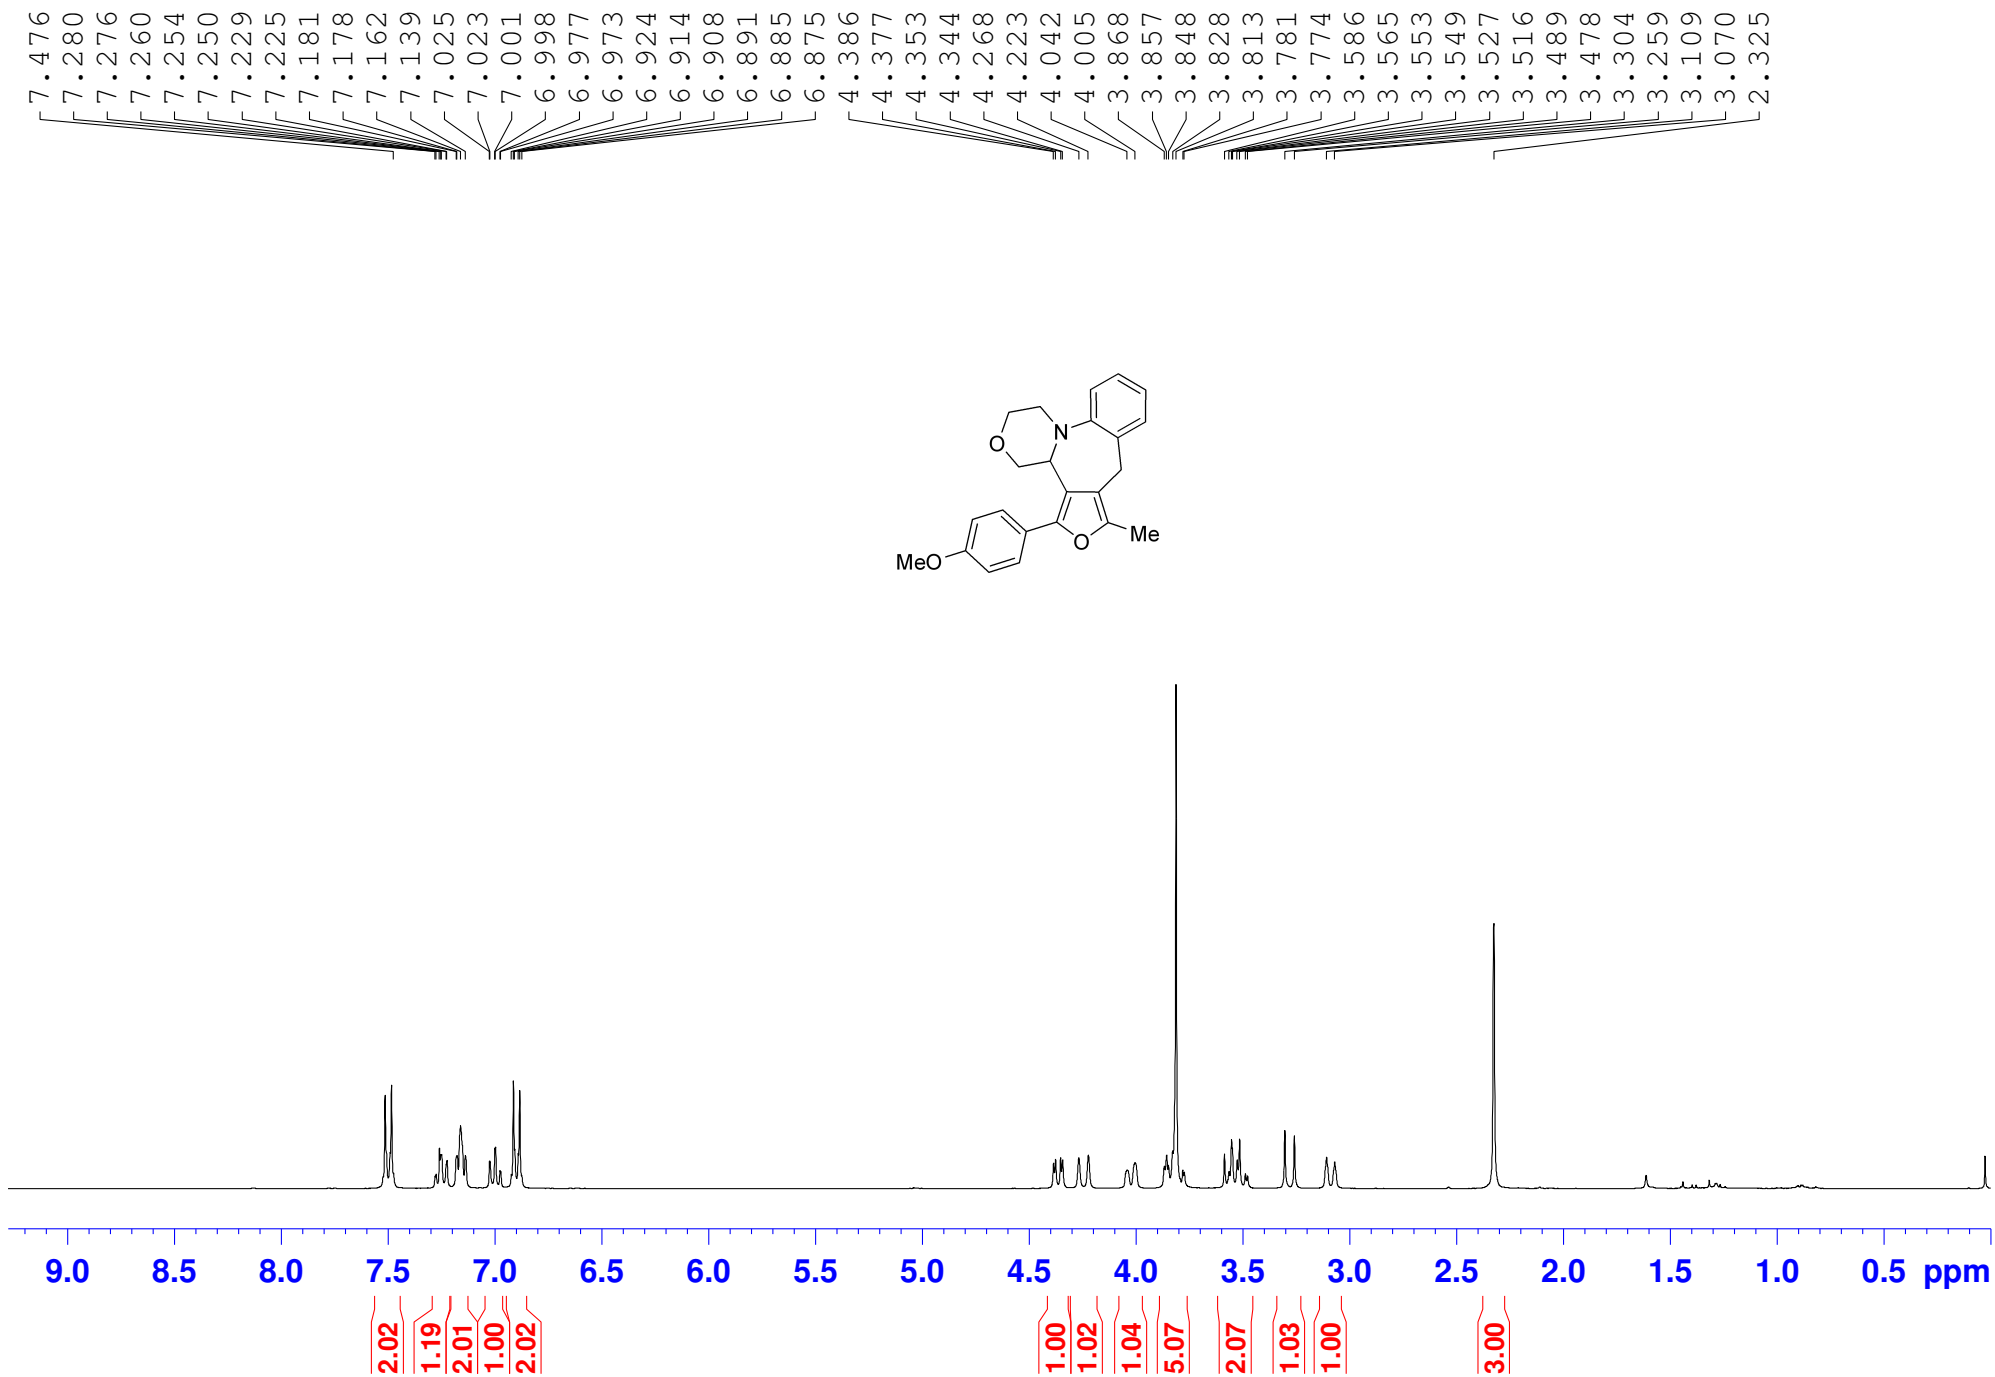

— 158.37  
— 149.31  
— 146.24  
— 143.68  
— 139.31  
— 127.33  
— 126.96  
— 126.37  
— 124.30  
— 123.43  
— 119.94  
— 118.96  
— 116.10  
— 114.07  
  
— 77.42  
— 77.00  
— 76.58  
— 71.44  
— 67.61  
— 60.71  
— 55.21  
— 51.85  
  
— 28.83  
  
— 11.25

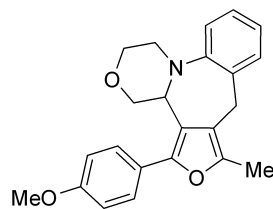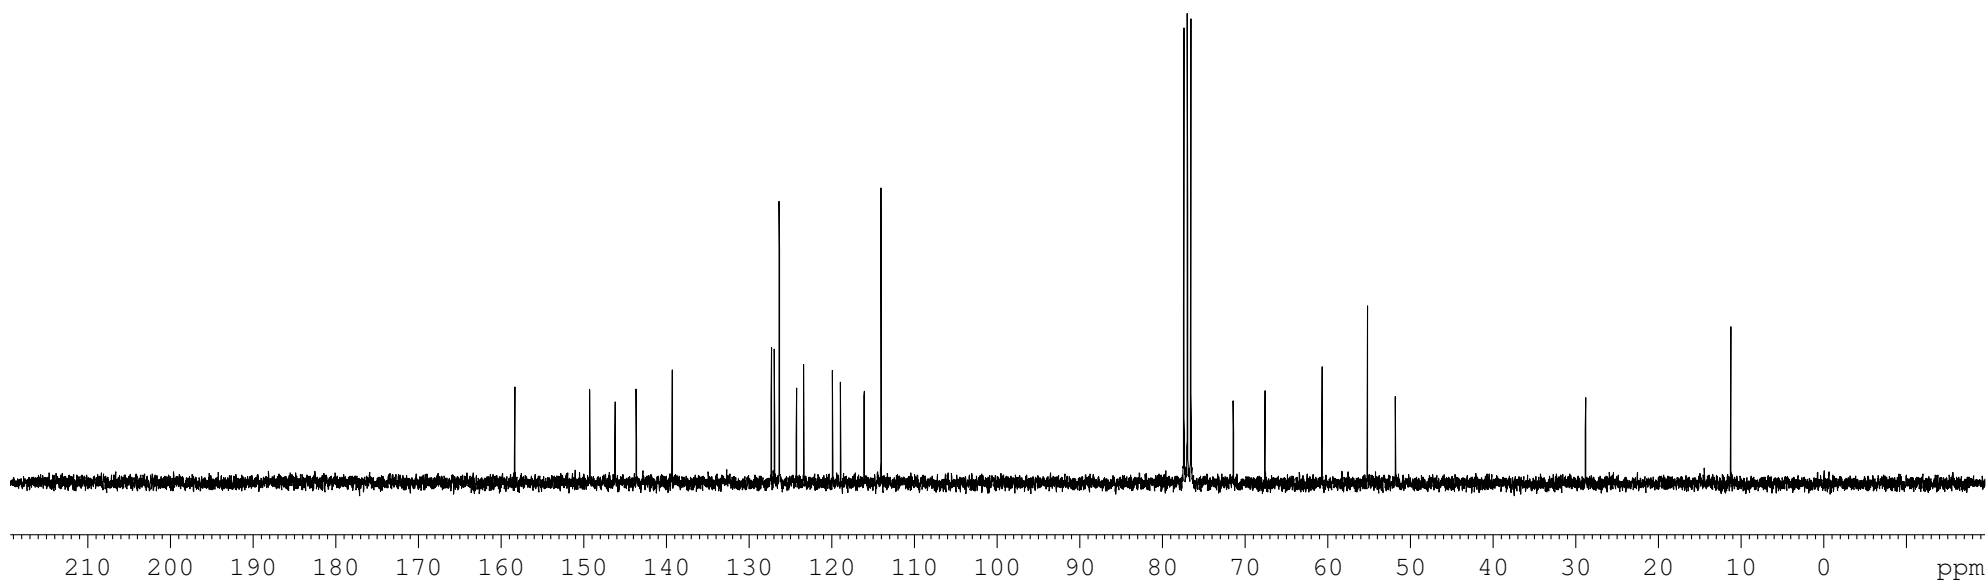

8.210  
8.180  
7.711  
7.681  
7.288  
7.260  
7.238  
7.179  
7.153  
7.033  
7.009  
7.007  
6.985

4.427  
4.418  
4.394  
4.385  
4.302  
4.257  
4.073  
4.037  
3.872  
3.865  
3.835  
3.805  
3.798  
3.635  
3.601  
3.597  
3.583  
3.563  
3.554  
3.544  
3.516  
3.506  
3.308  
3.263  
3.131  
3.092  
2.364

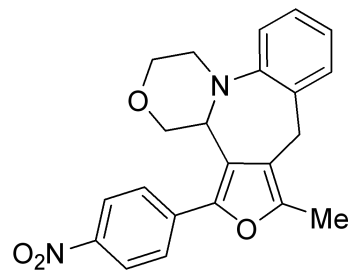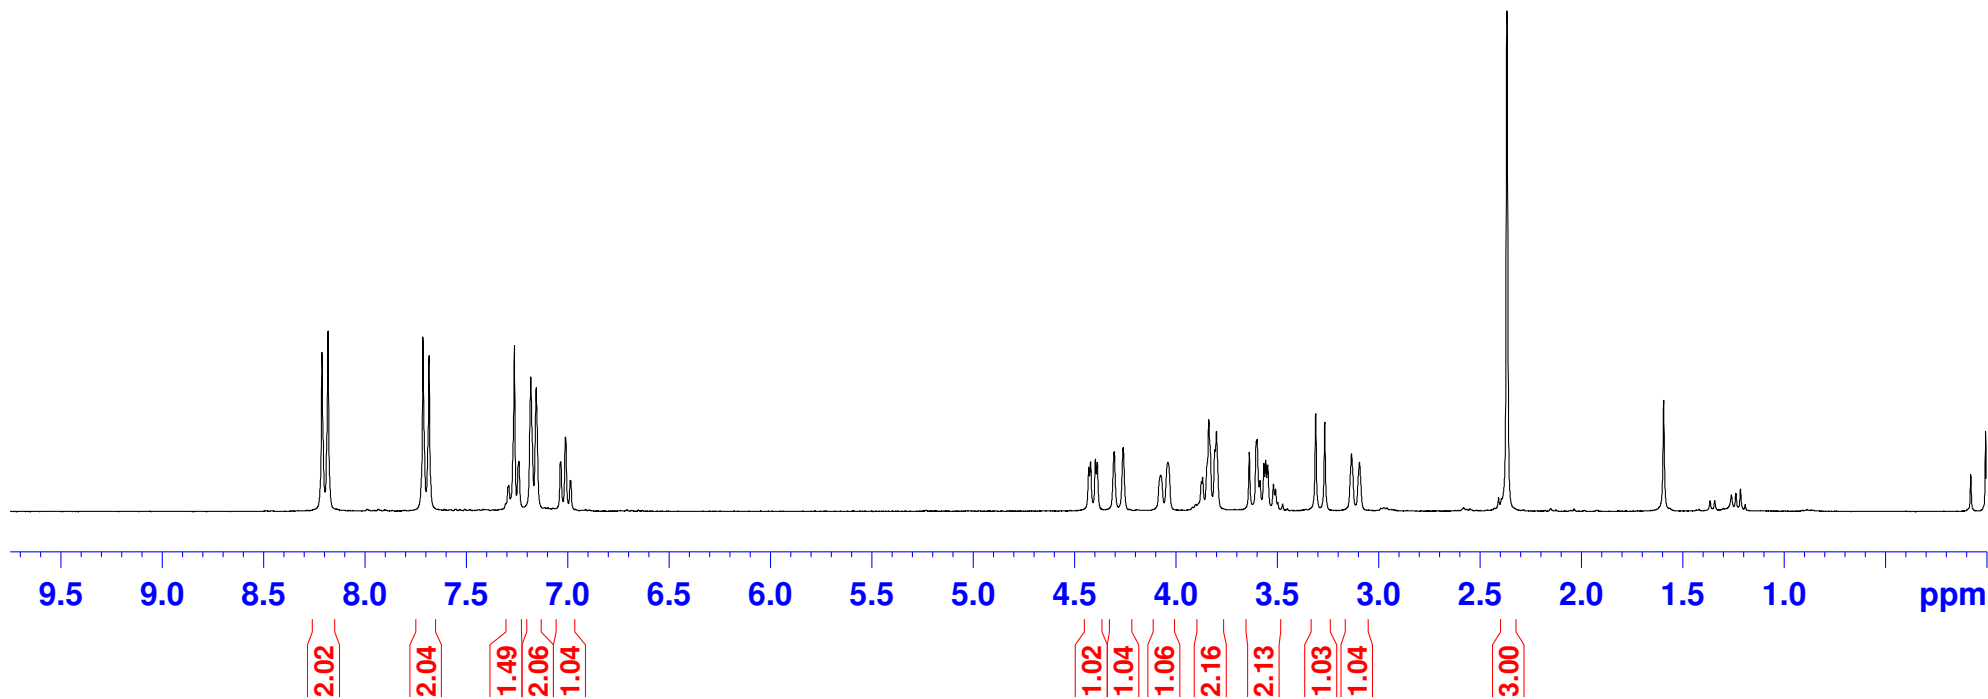

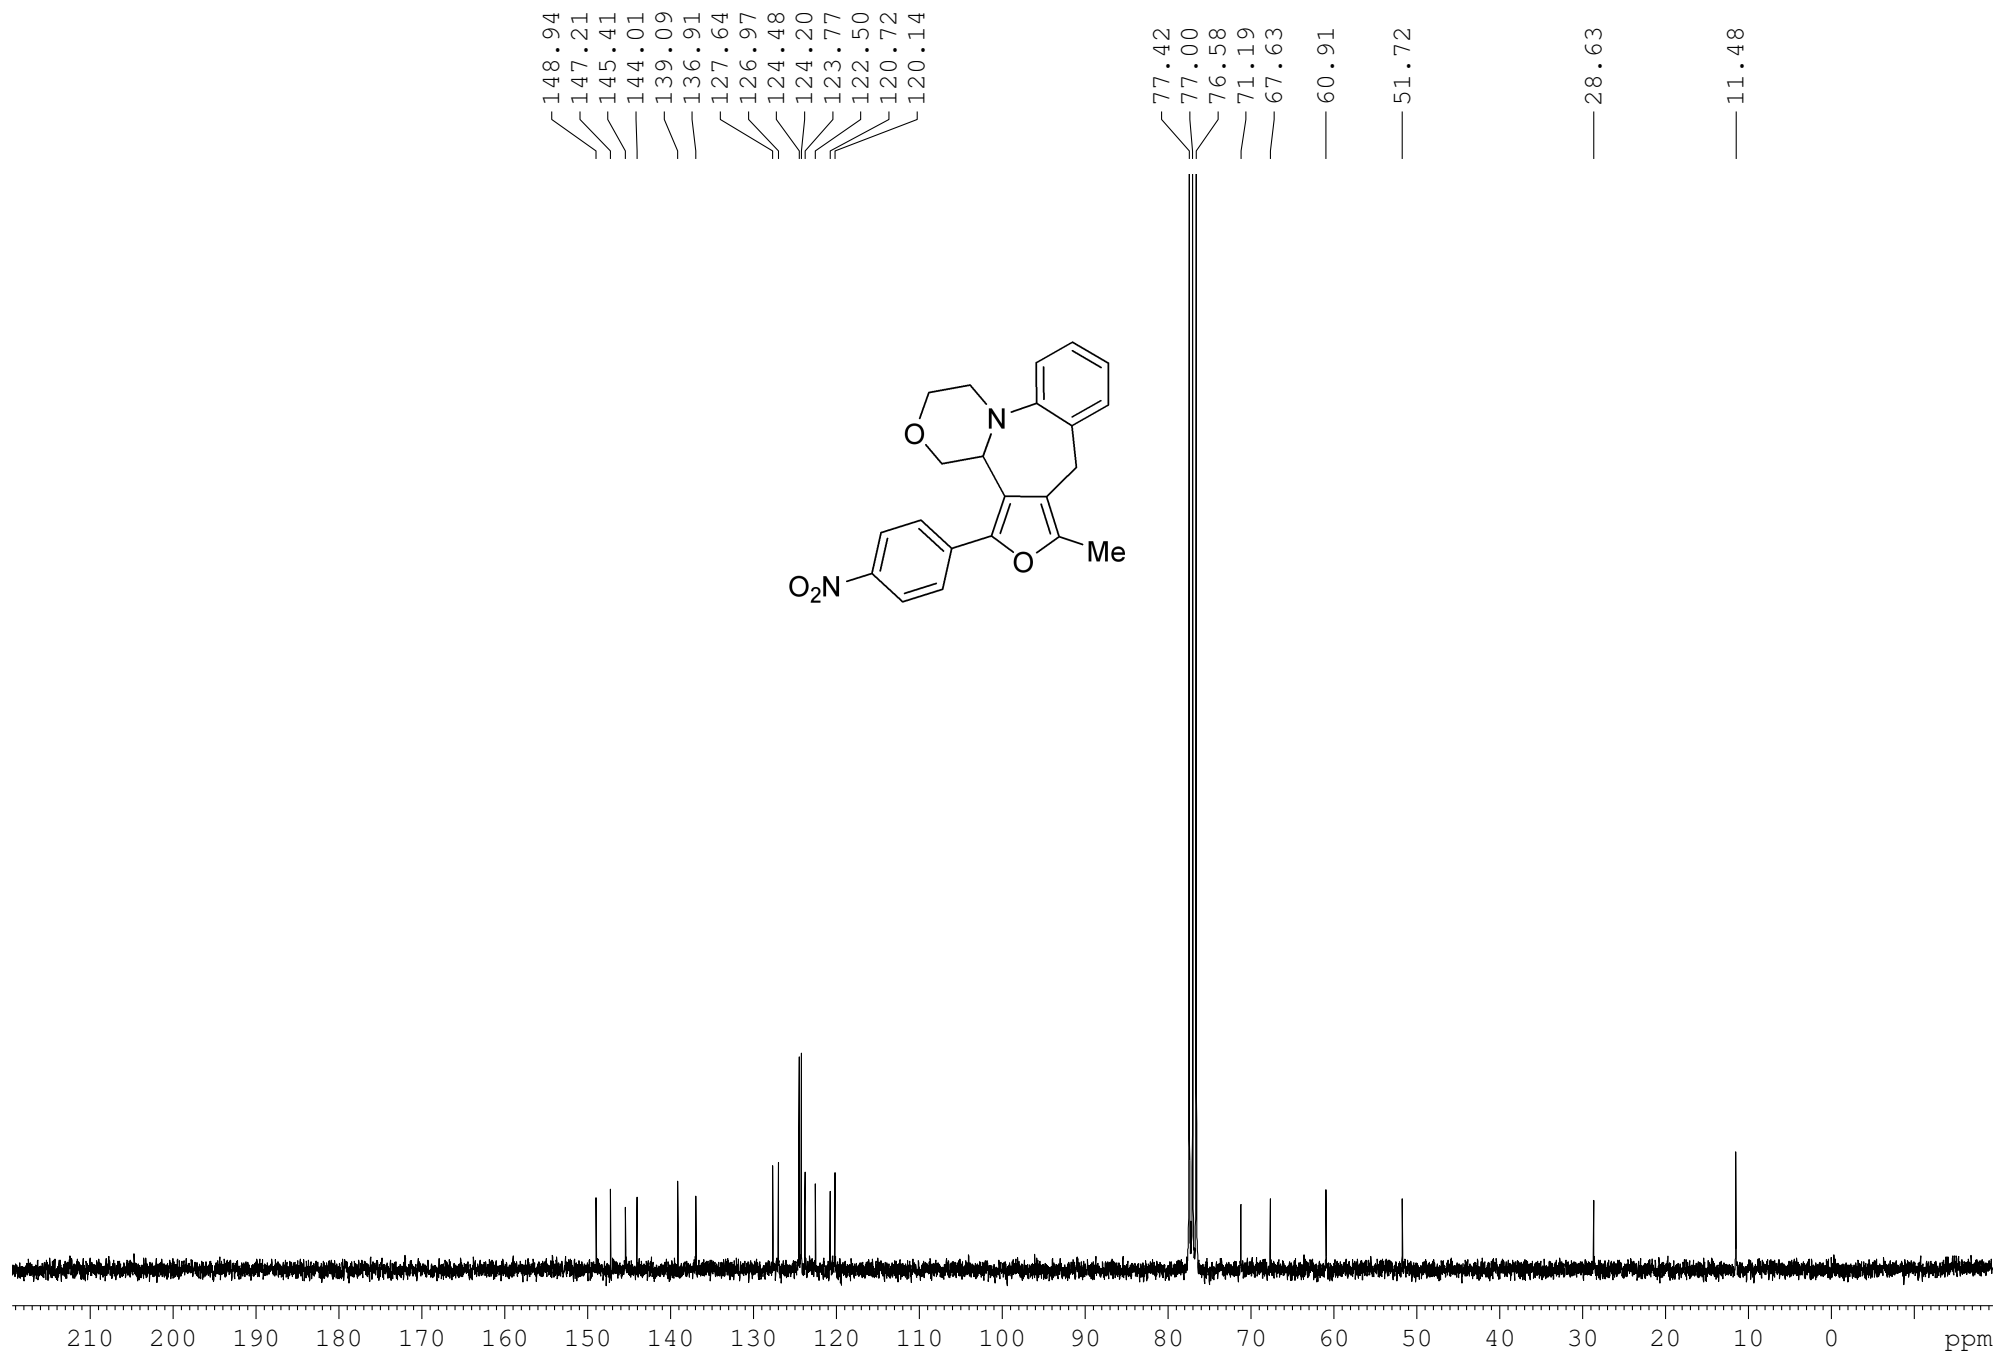

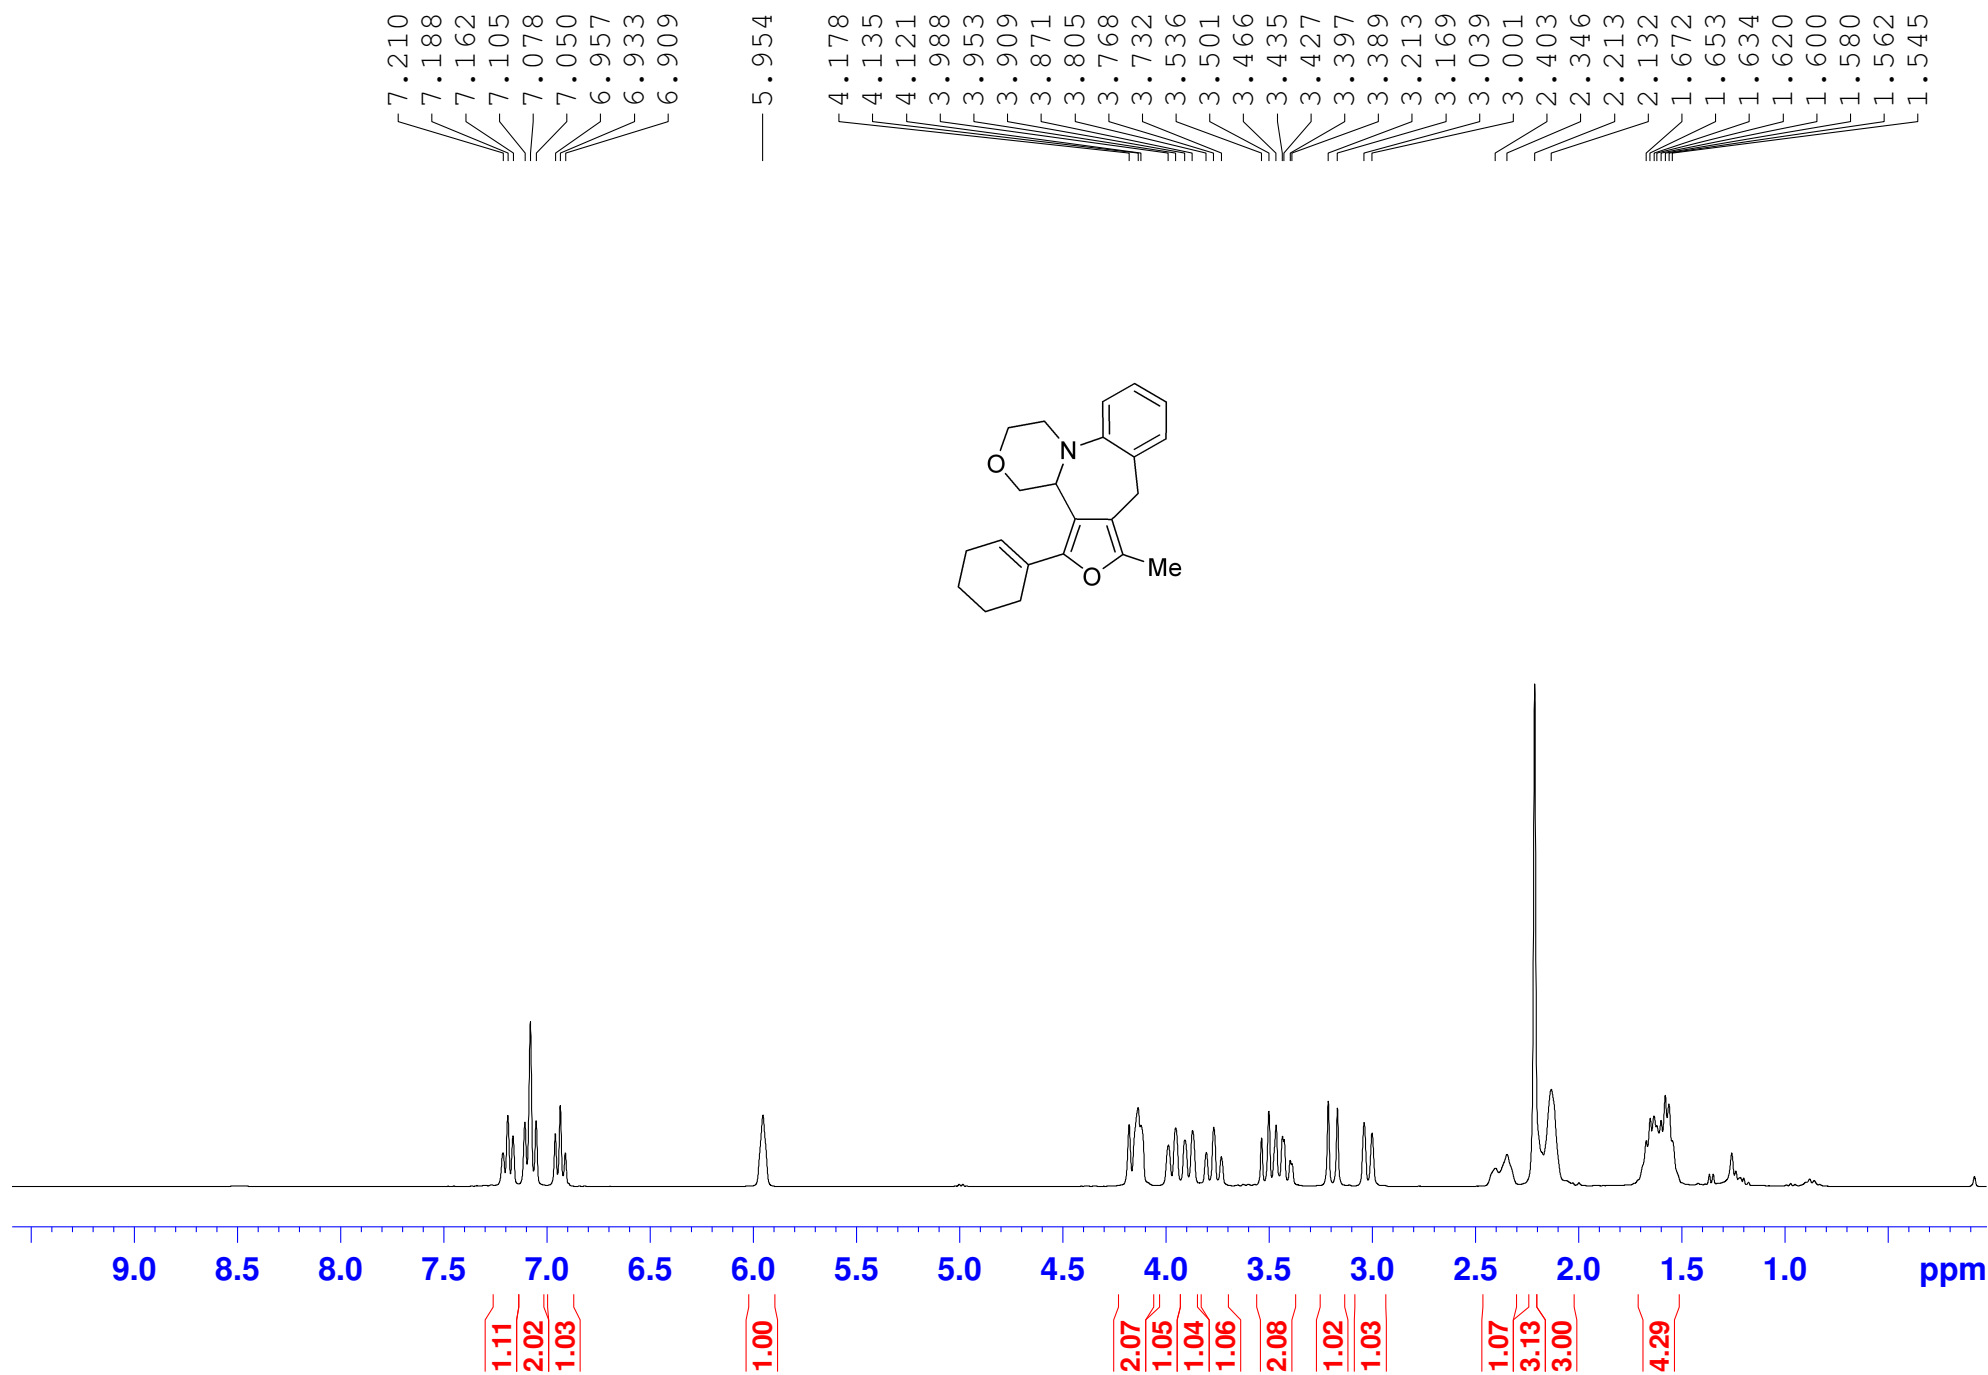



149.30  
148.56  
142.59  
139.35  
128.77  
127.17  
126.84  
125.02  
123.19  
119.79  
118.43  
115.63

77.42  
77.00  
76.58  
71.76  
67.57  
60.59  
51.79

28.78  
26.05  
25.39  
22.48  
21.91  
11.09

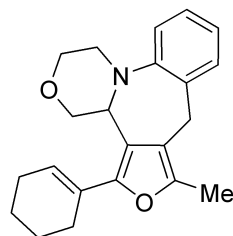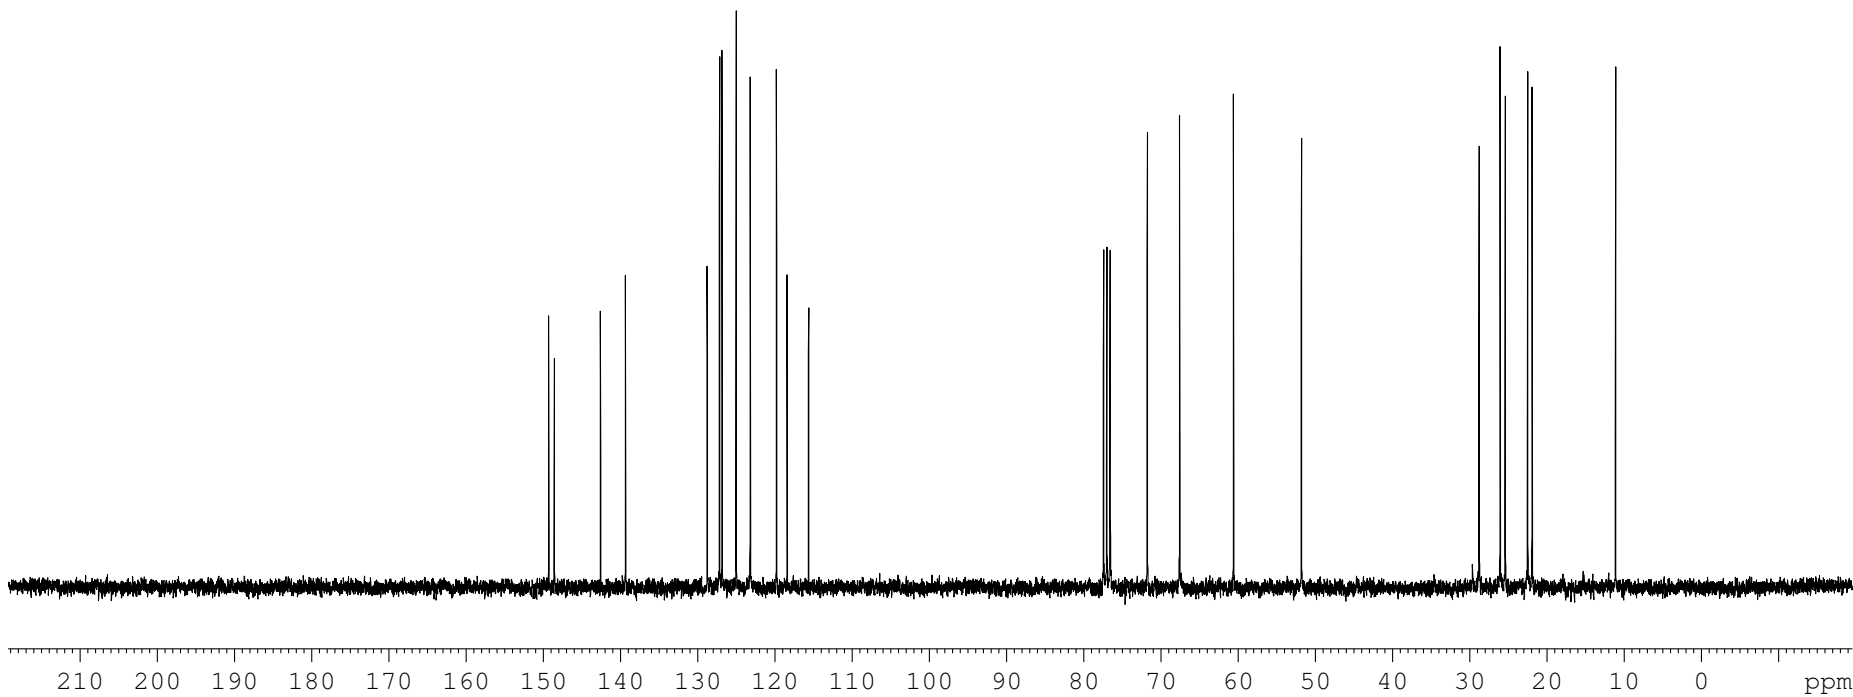

7.130  
7.105  
7.080  
7.022  
6.993  
6.964  
6.876  
6.852  
6.827  
4.052  
4.008  
3.903  
3.868  
3.786  
3.777  
3.752  
3.743  
3.712  
3.674  
3.637  
3.491  
3.455  
3.420  
3.386  
3.377  
3.348  
3.338  
3.310  
3.300  
3.128  
3.084  
2.964  
2.926  
2.295  
2.270  
2.244  
2.110  
1.448  
1.423  
1.405  
1.382  
1.359  
1.278  
1.254  
1.230  
1.205  
1.180  
1.156  
0.815  
0.790  
0.766

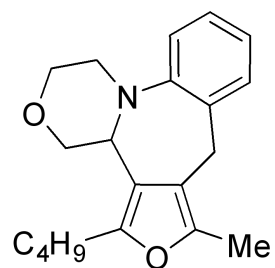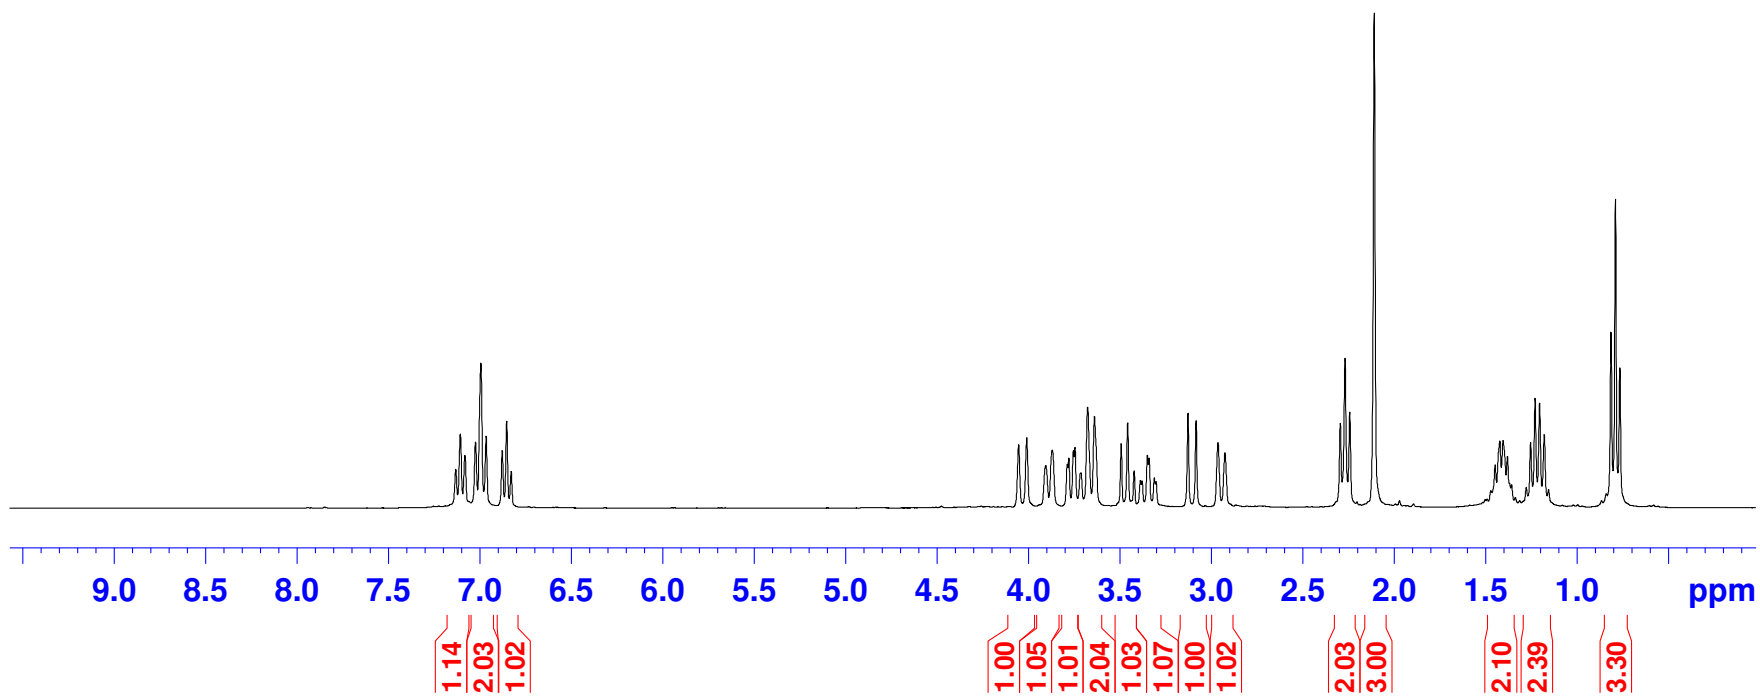

149.31  
149.22  
142.48  
139.40  
127.14  
126.99  
123.18  
119.92  
117.11  
114.68

77.43  
77.00  
76.58  
72.81  
67.46  
59.72  
51.80

30.48  
28.77  
26.40  
22.57  
13.79  
11.06

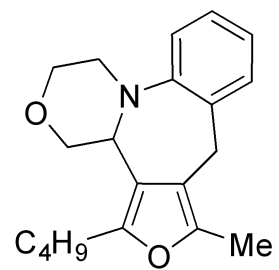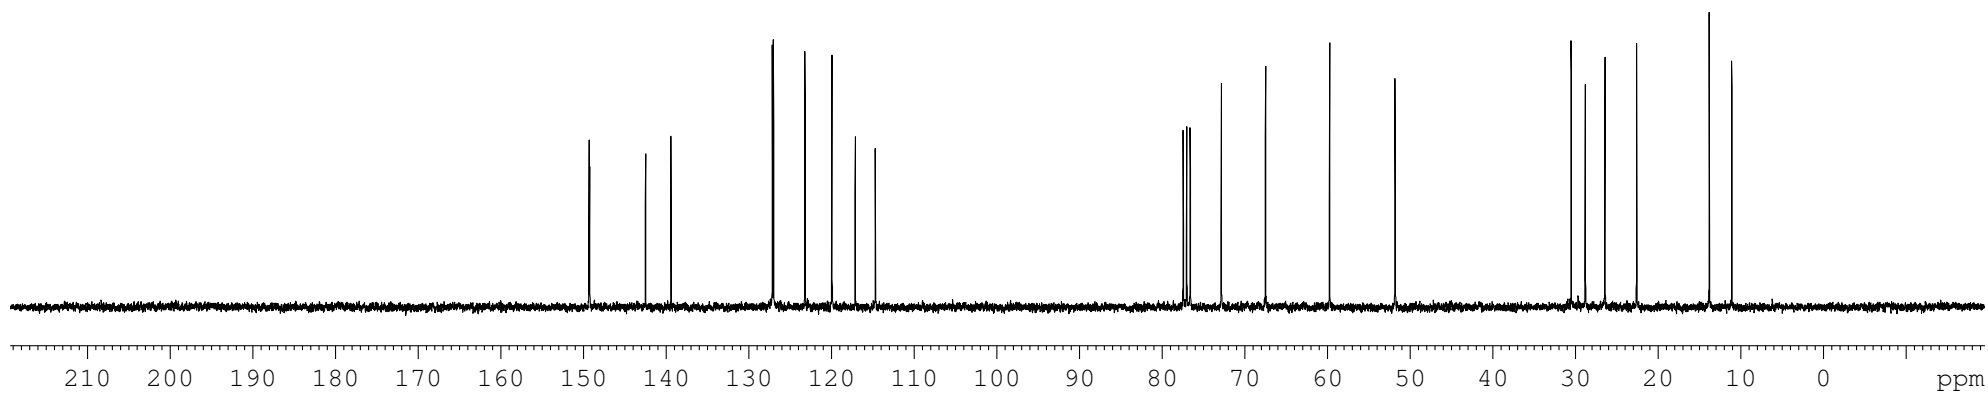

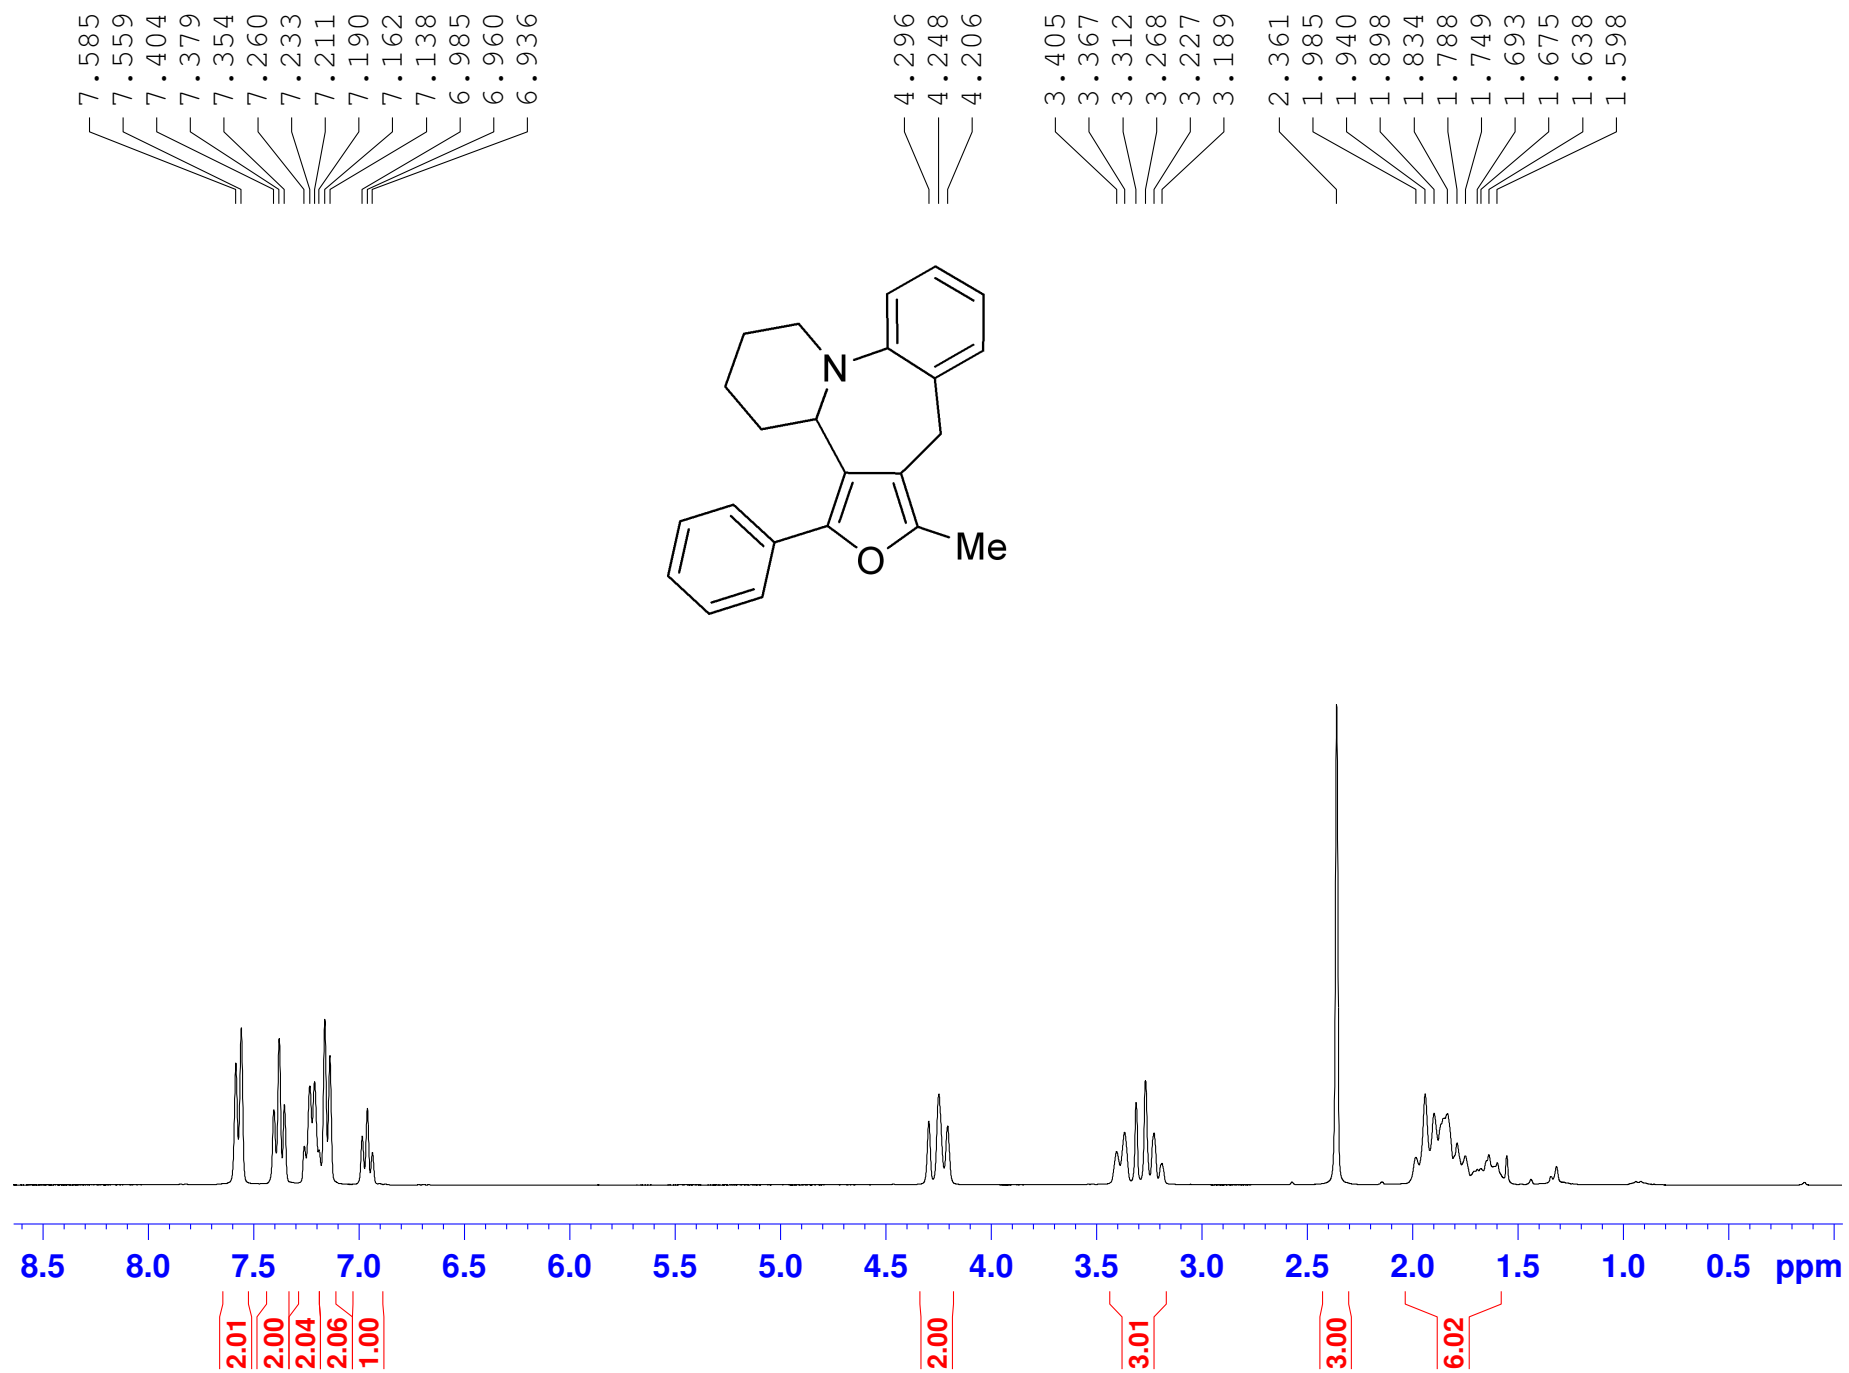

150.48  
144.94  
143.81  
139.83  
131.88  
128.40  
127.05  
126.37  
126.14  
124.77  
123.92  
122.60  
120.55  
119.31

77.42  
77.00  
76.58

61.45  
53.81

35.52  
28.89  
26.80  
25.34

11.28

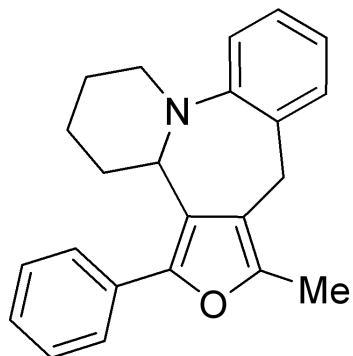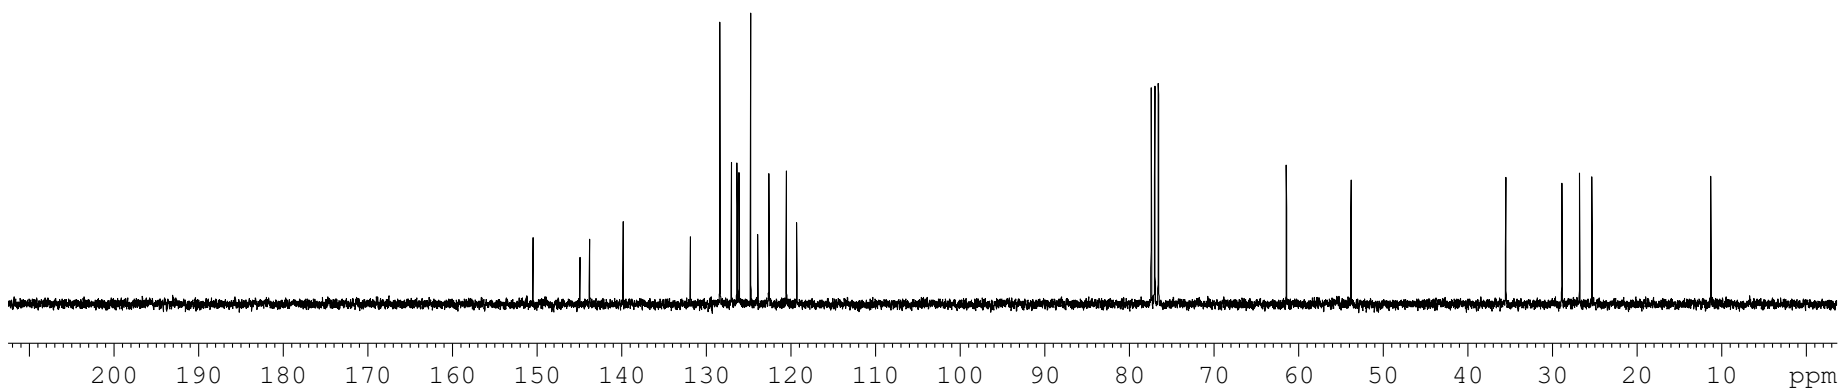

7.453  
7.427  
7.307  
7.277  
7.260  
7.247  
7.204  
7.182  
7.156  
7.140  
7.115  
6.981  
6.958  
6.936  
6.912

4.267  
4.222  
4.199  
4.165  
4.132  
3.382  
3.345  
3.286  
3.242  
3.202  
3.162  
2.355  
2.333  
1.949  
1.908  
1.865  
1.819  
1.782  
1.769  
1.728  
1.642  
1.603  
1.560

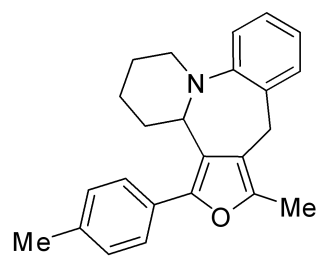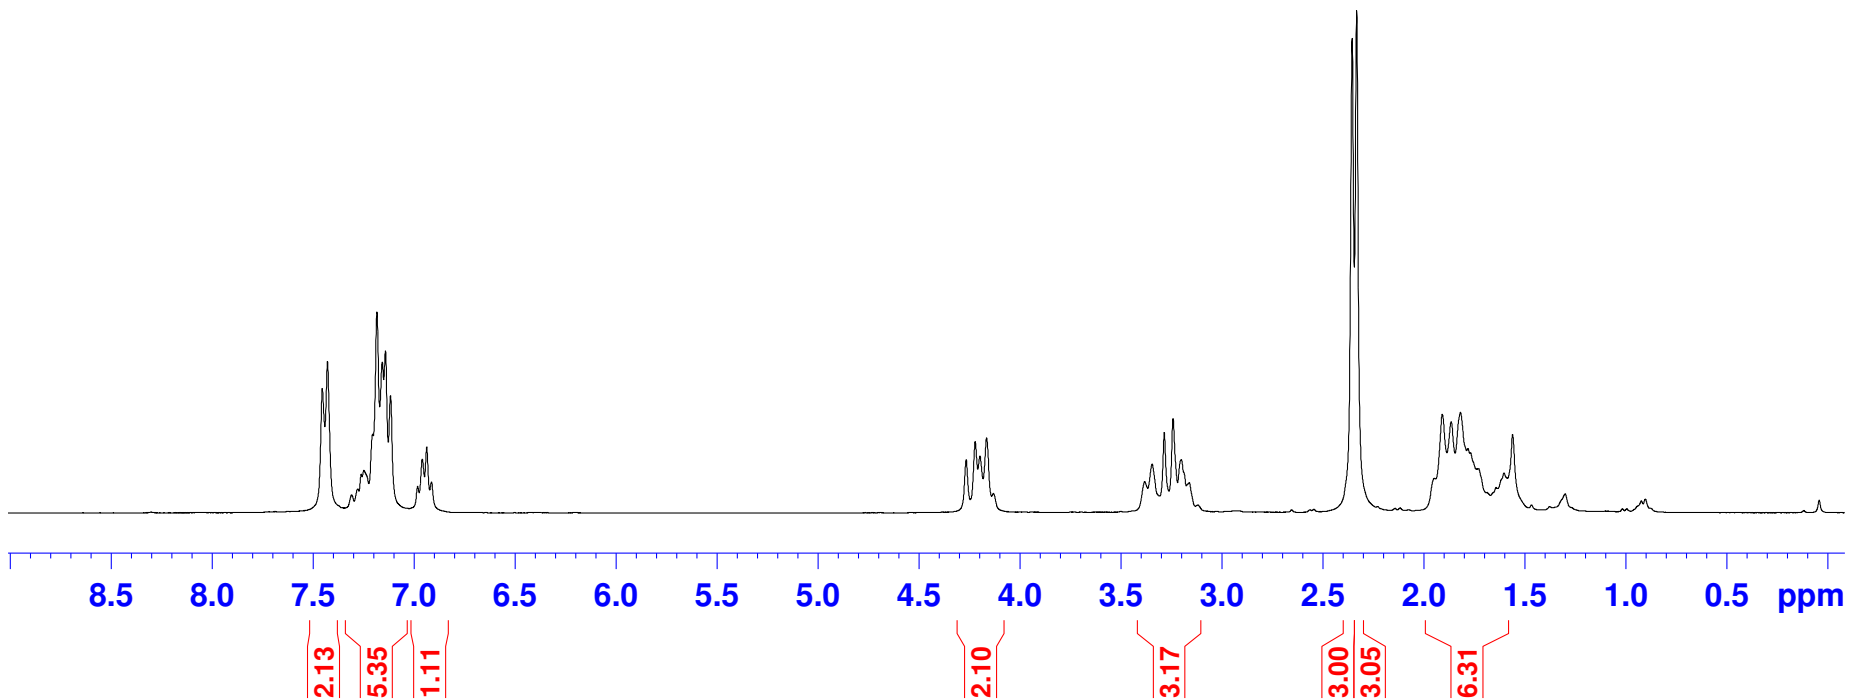

150.55  
145.19  
143.40  
139.86  
135.88  
129.20  
129.12  
127.03  
126.40  
124.79  
123.12  
122.58  
120.55  
119.15

77.42  
77.00  
76.58

61.48

53.84

35.50

28.93

26.83

25.36

21.14

11.28

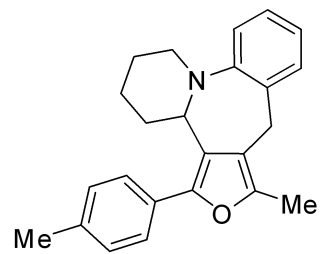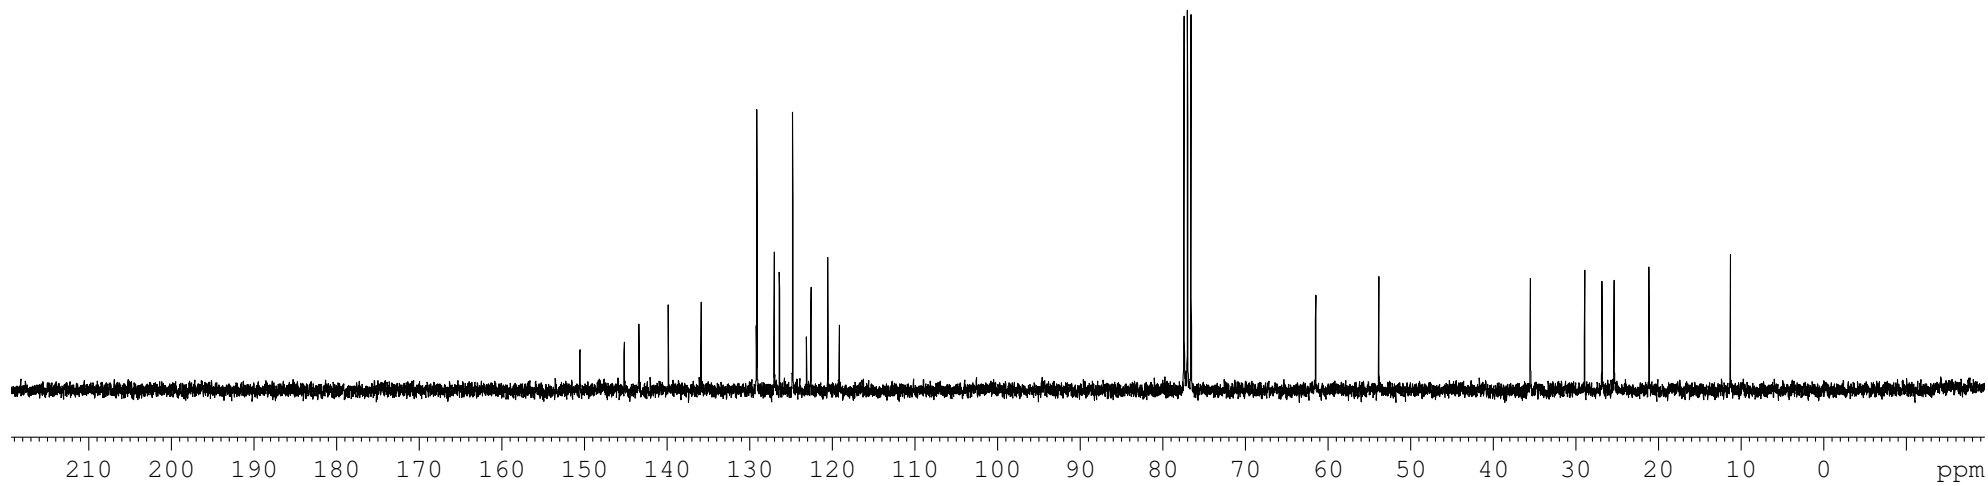

7.479  
7.450  
7.260  
7.221  
7.196  
7.172  
7.128  
7.104  
6.951  
6.924  
6.914  
6.885

4.249  
4.206  
4.145  
4.116  
3.821  
3.374  
3.337  
3.275  
3.231  
3.193  
3.186  
3.156  
3.148  
2.318  
1.875  
1.854  
1.807  
1.783  
1.770  
1.758  
1.717  
1.629  
1.603  
1.589  
1.551

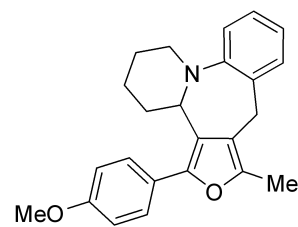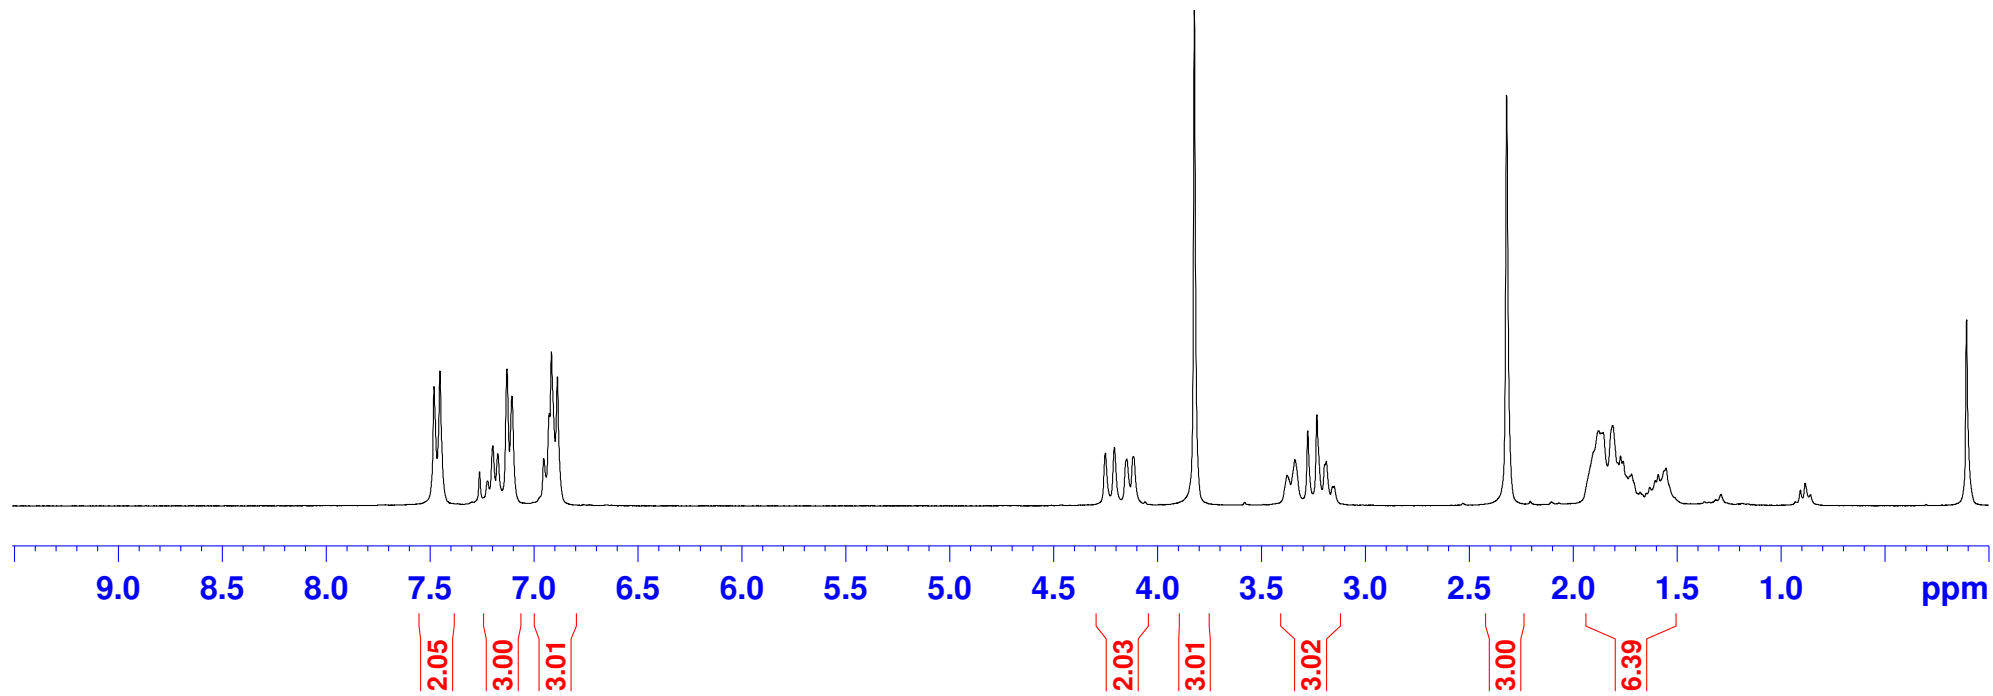



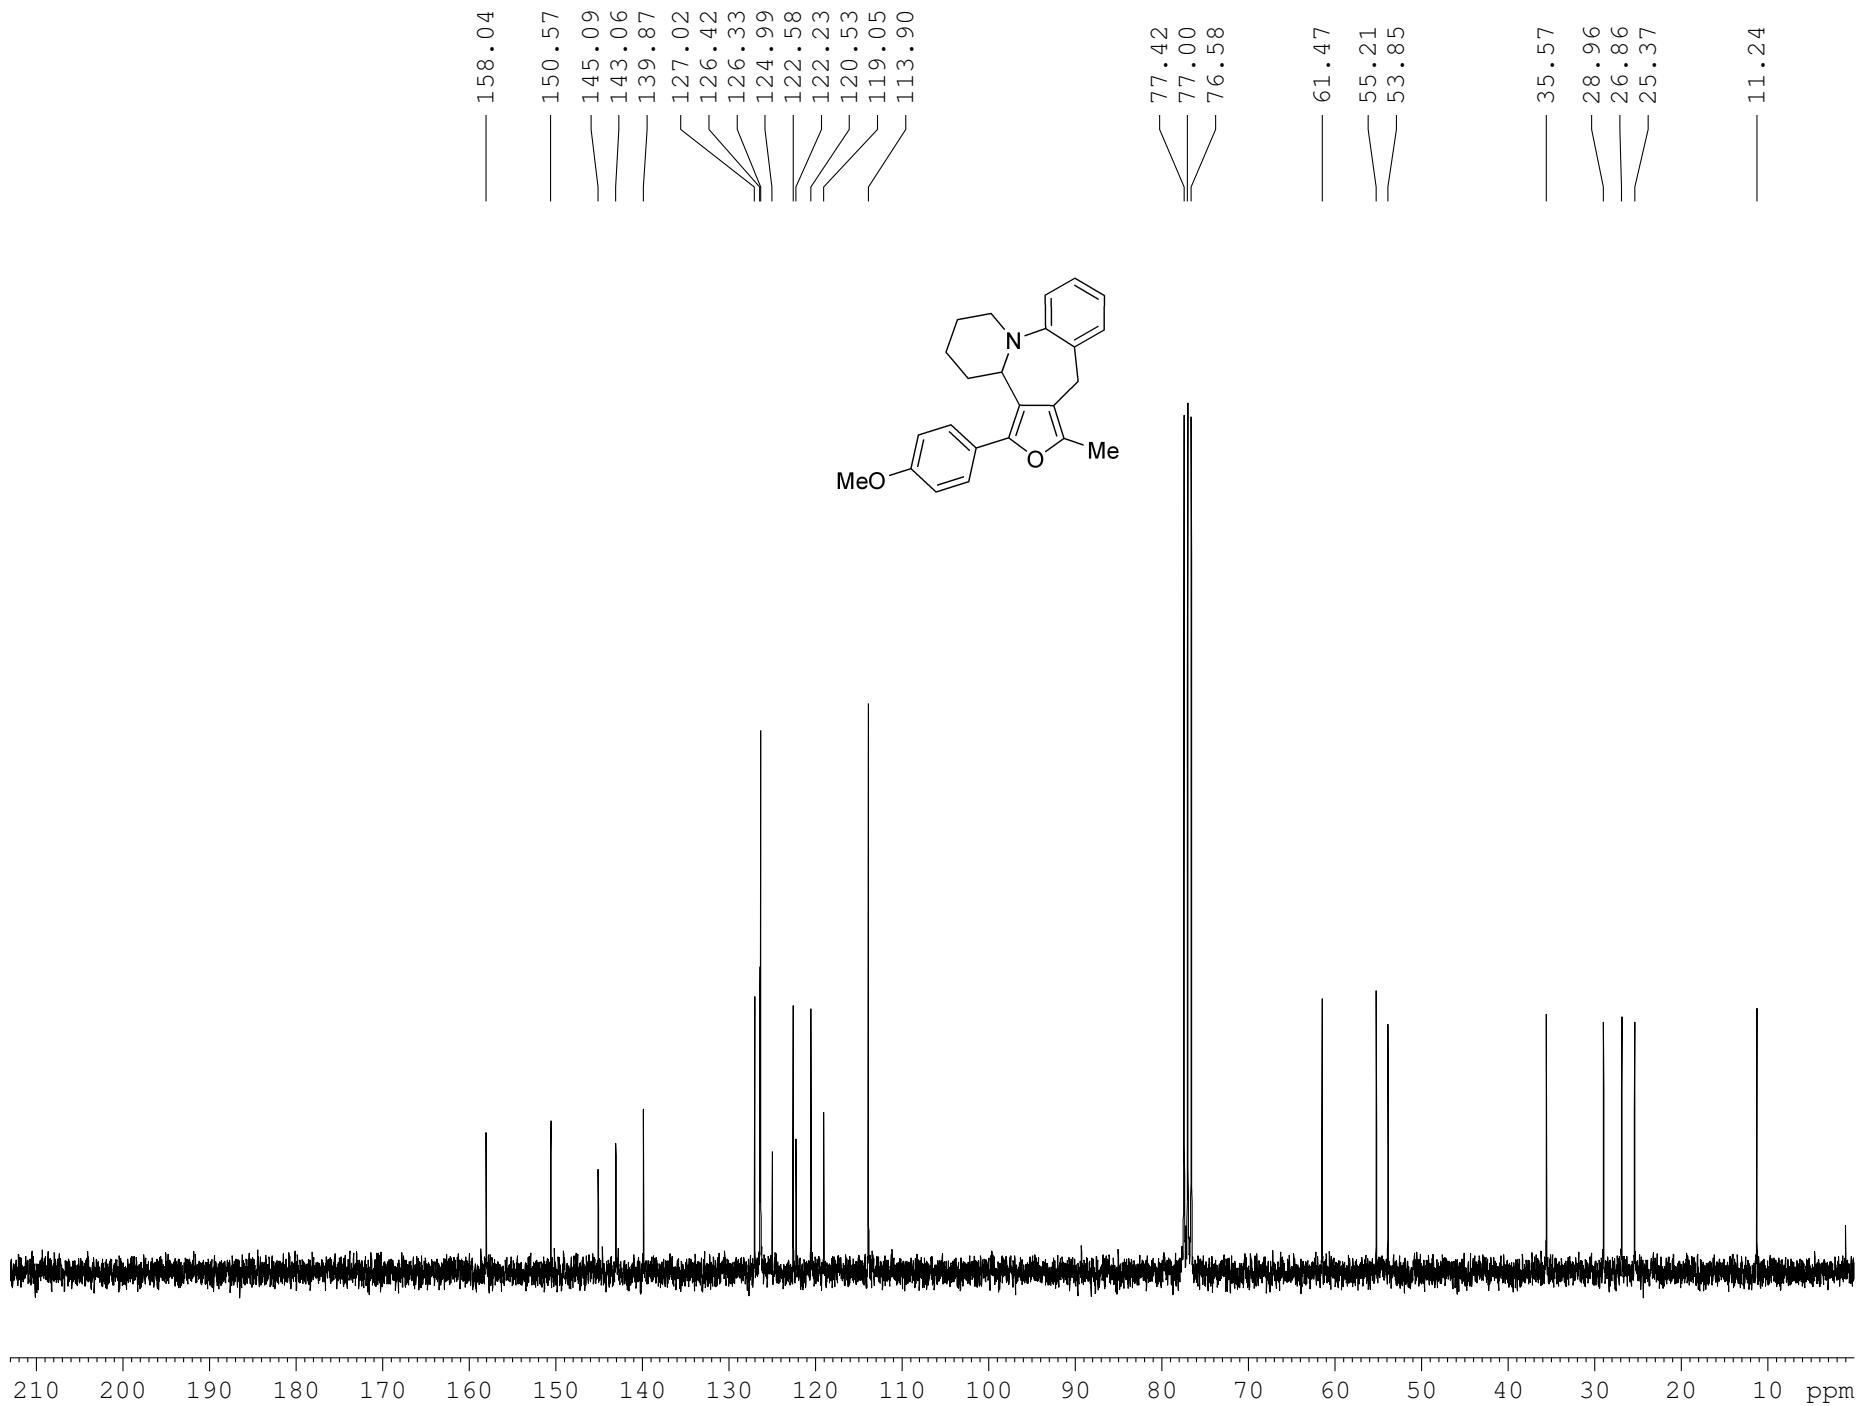

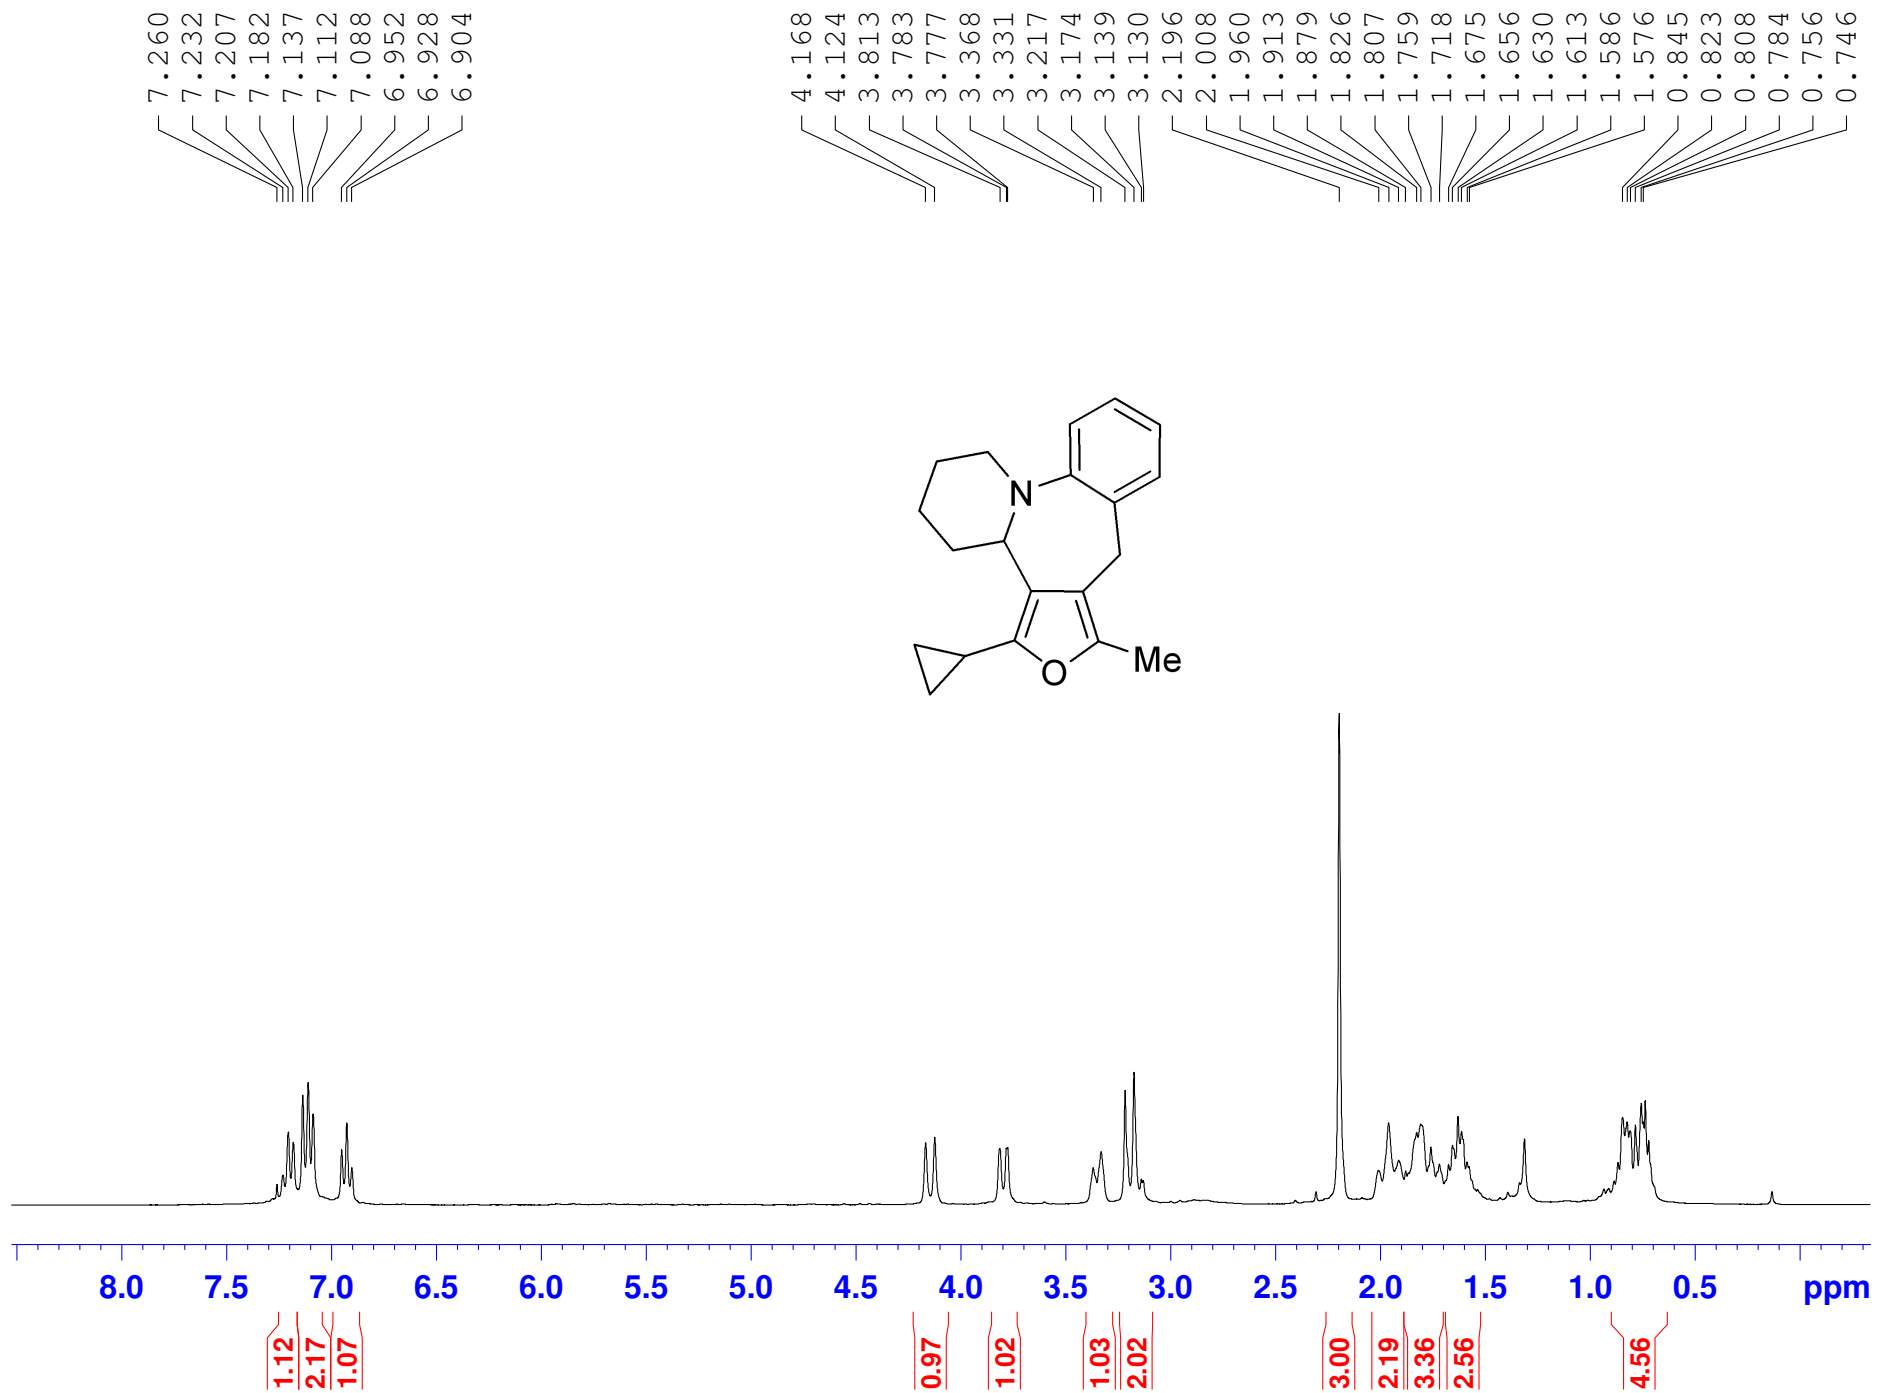

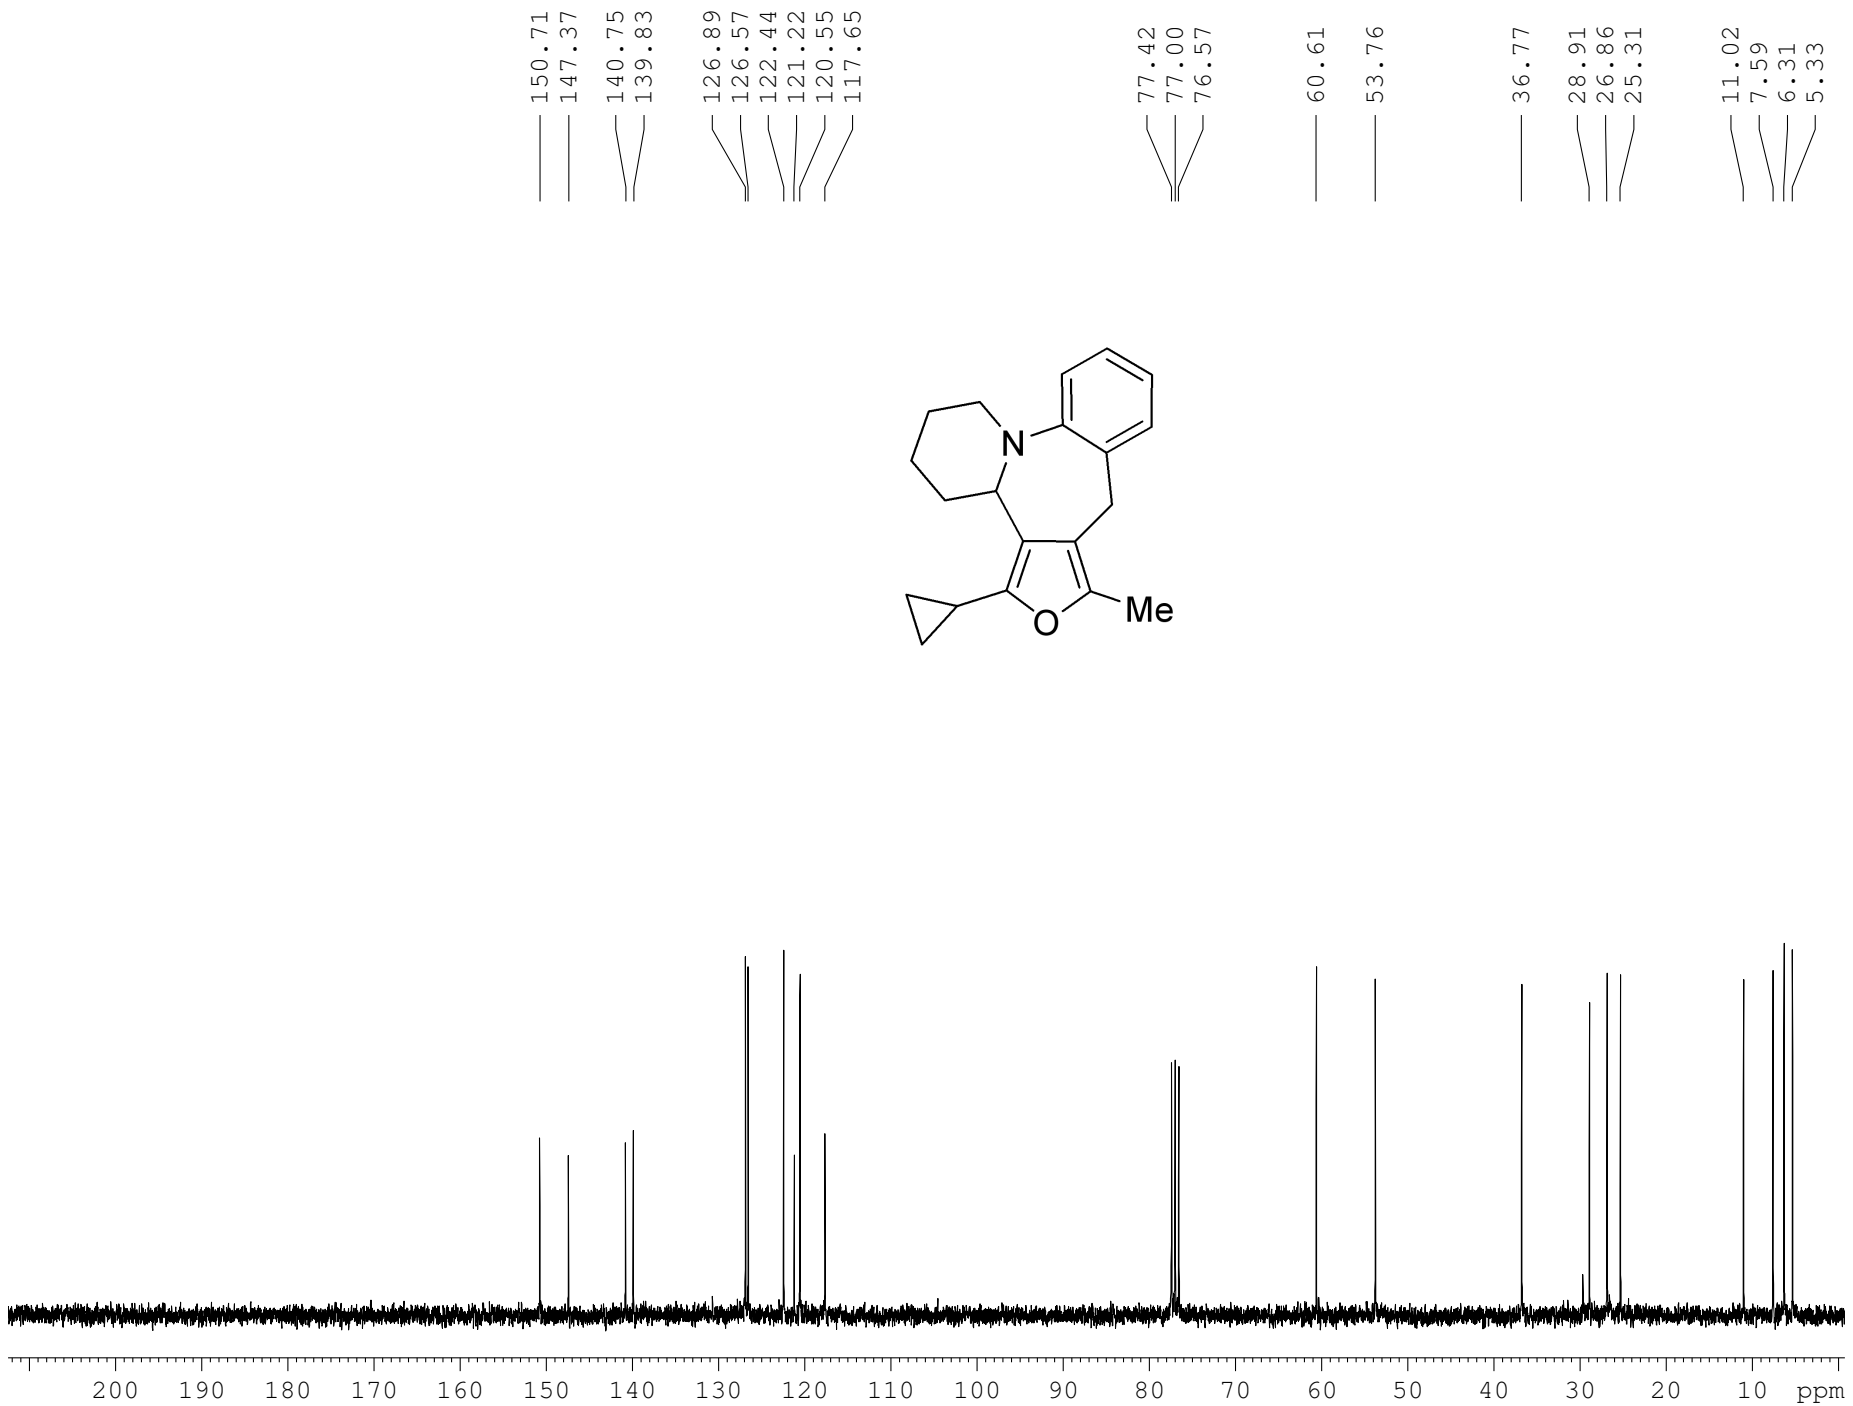

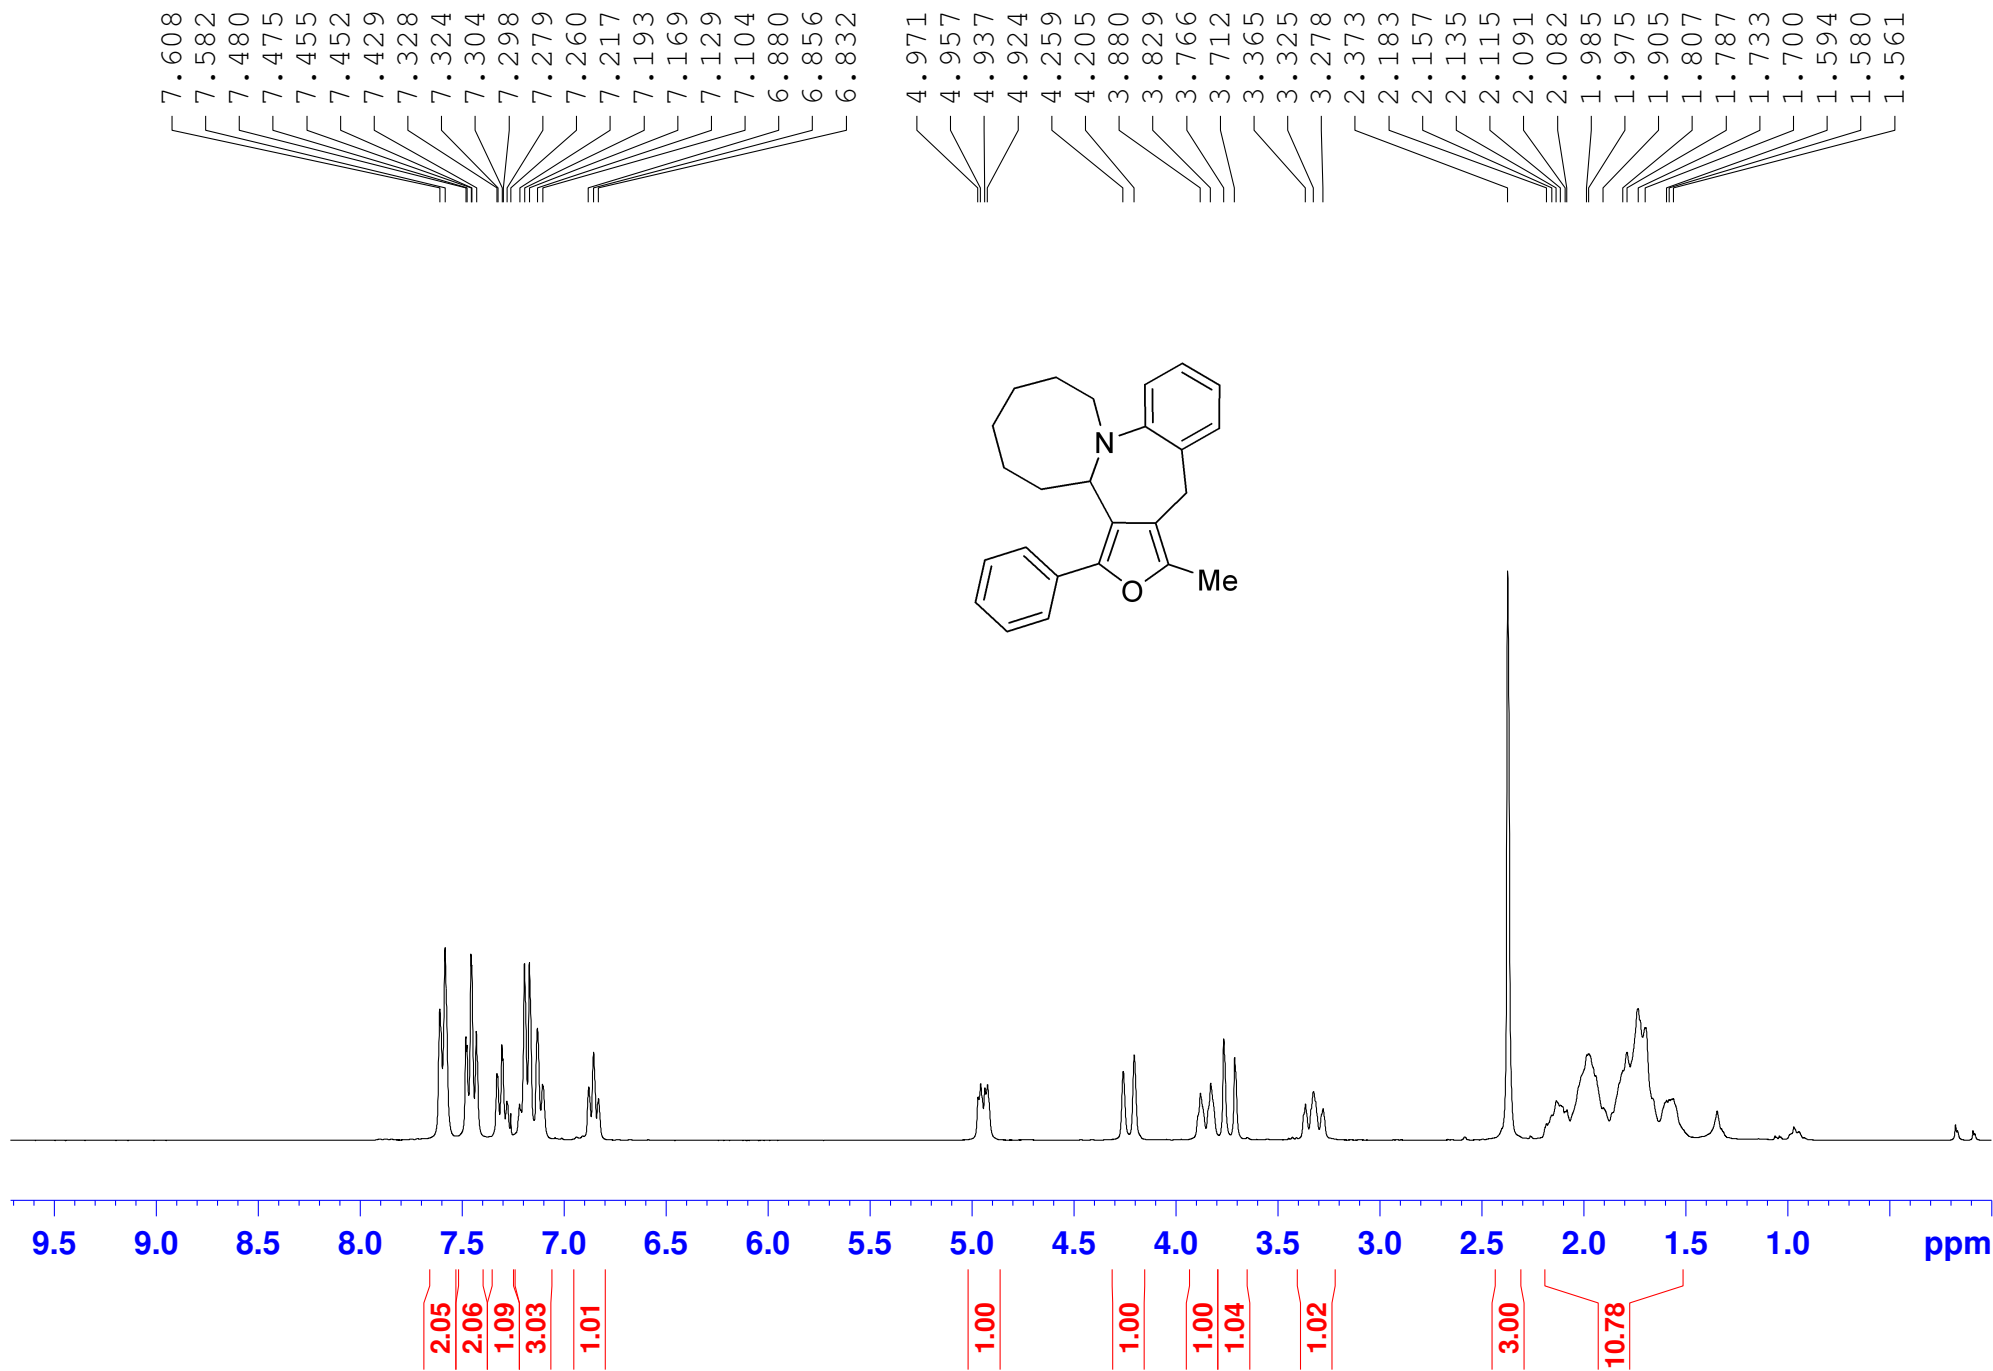

zgh-03-60-1 C

148.40  
145.10  
144.50  
131.83  
130.20  
130.08  
128.50  
127.10  
126.57  
125.57  
124.19  
120.09  
119.74  
118.50

77.43  
77.00  
76.58

57.98  
54.67

34.56  
31.23  
28.02  
27.26  
26.69  
23.91

11.31

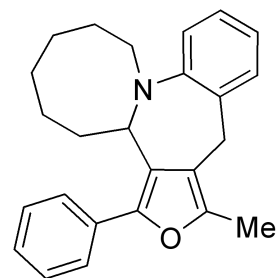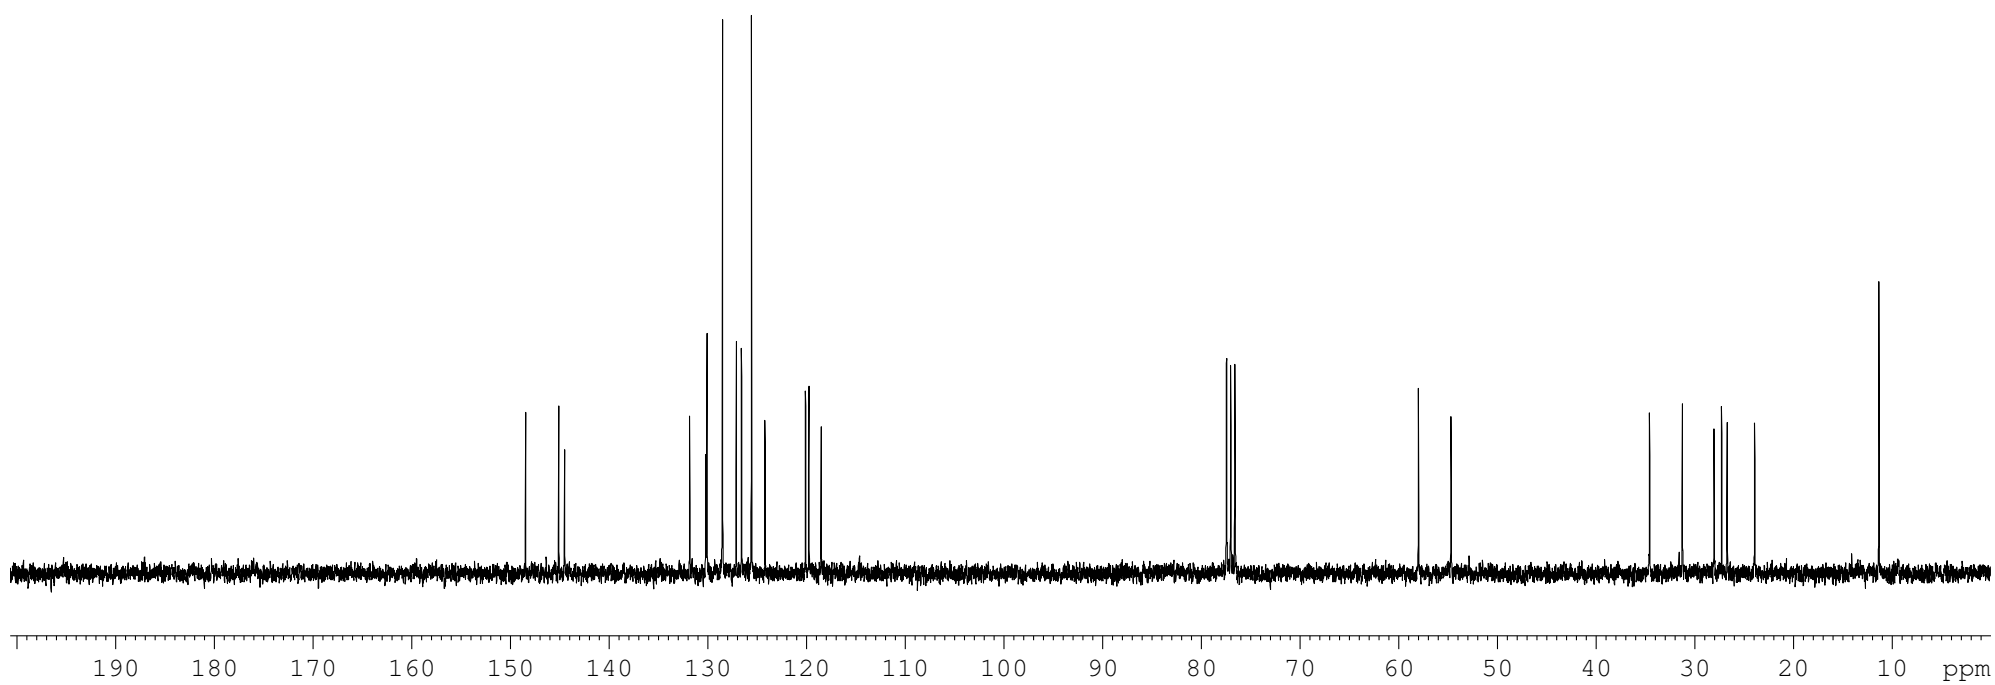

7.493  
7.468  
7.312  
7.288  
7.263  
7.223  
7.213  
7.200  
7.173  
7.147  
7.085  
7.056  
7.051  
7.037  
7.019  
7.015  
6.991  
6.967  
6.929  
6.917  
6.912  
6.899  
6.787  
6.775  
6.425  
6.408  
6.395  
5.494

4.442  
4.394  
4.302  
4.253

3.592  
3.543

2.410

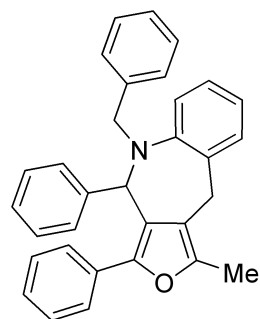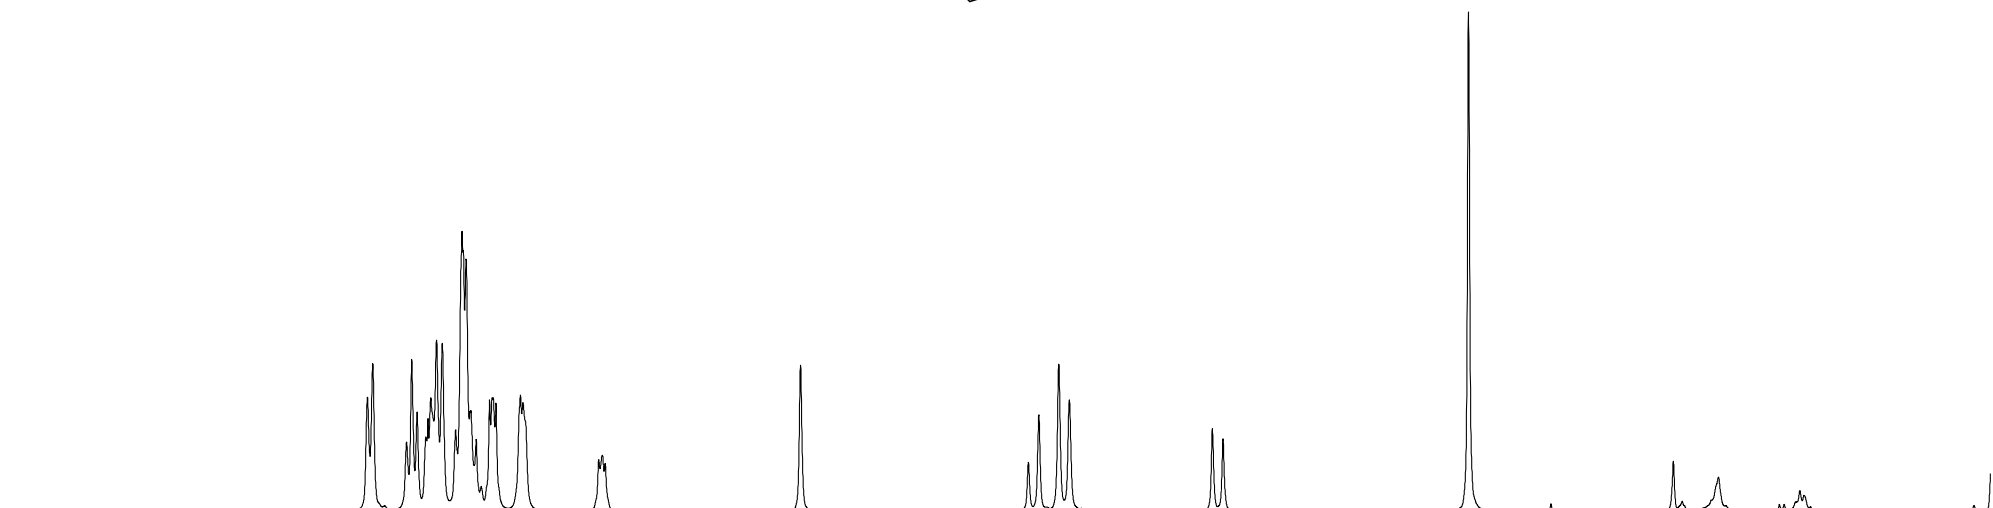

9.0 8.5 8.0 7.5 7.0 6.5 6.0 5.5 5.0 4.5 4.0 3.5 3.0 2.5 2.0 1.5 1.0 0.5 ppm

2.00  
2.11  
4.28  
6.14  
2.04  
2.04  
1.00  
1.00  
2.02  
1.01  
3.00

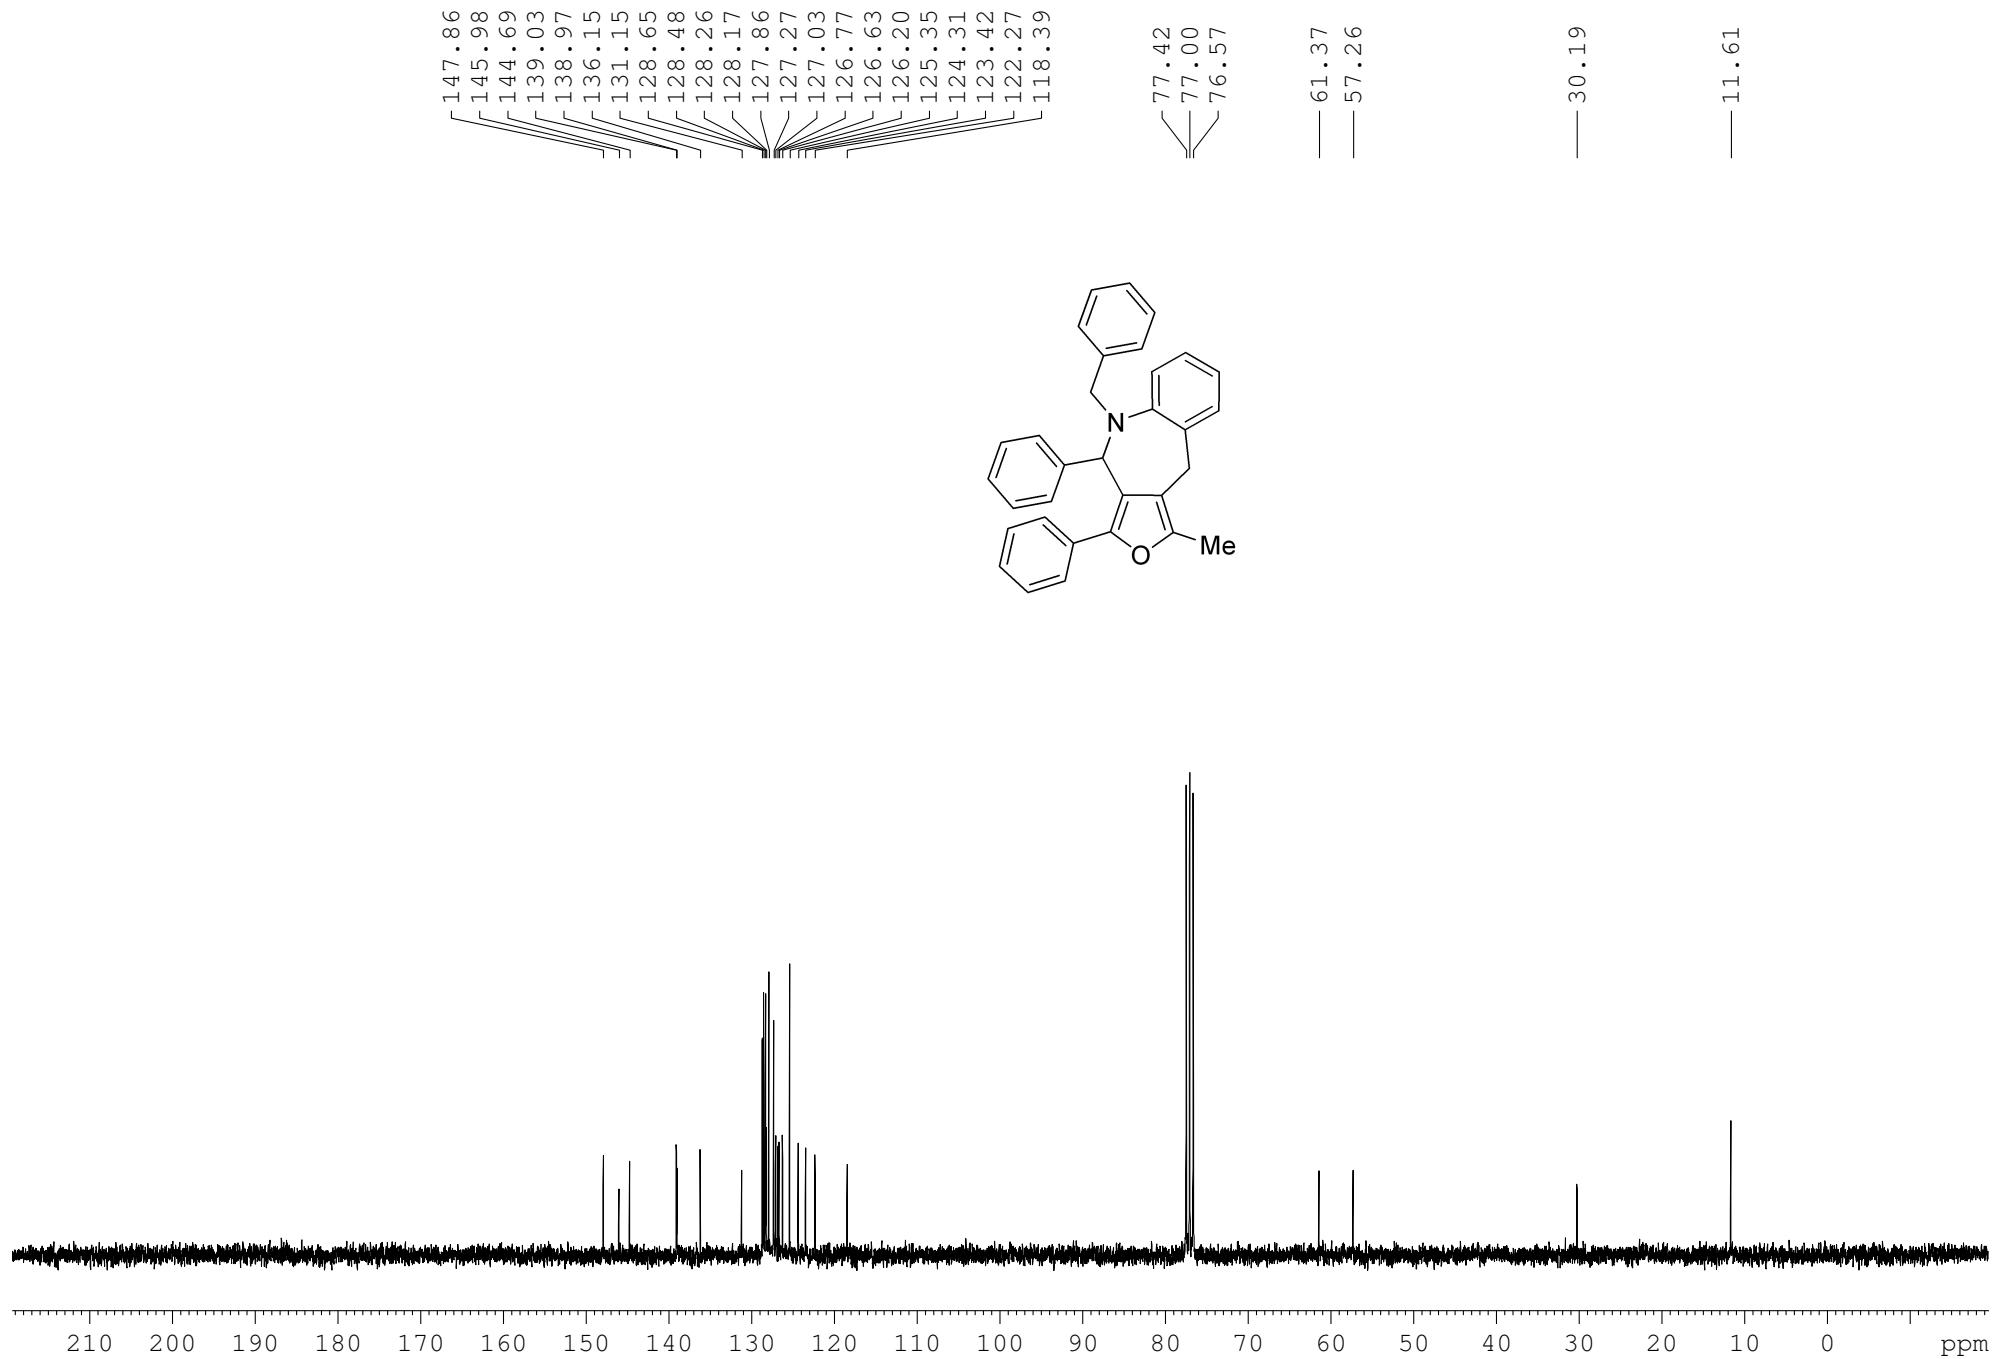

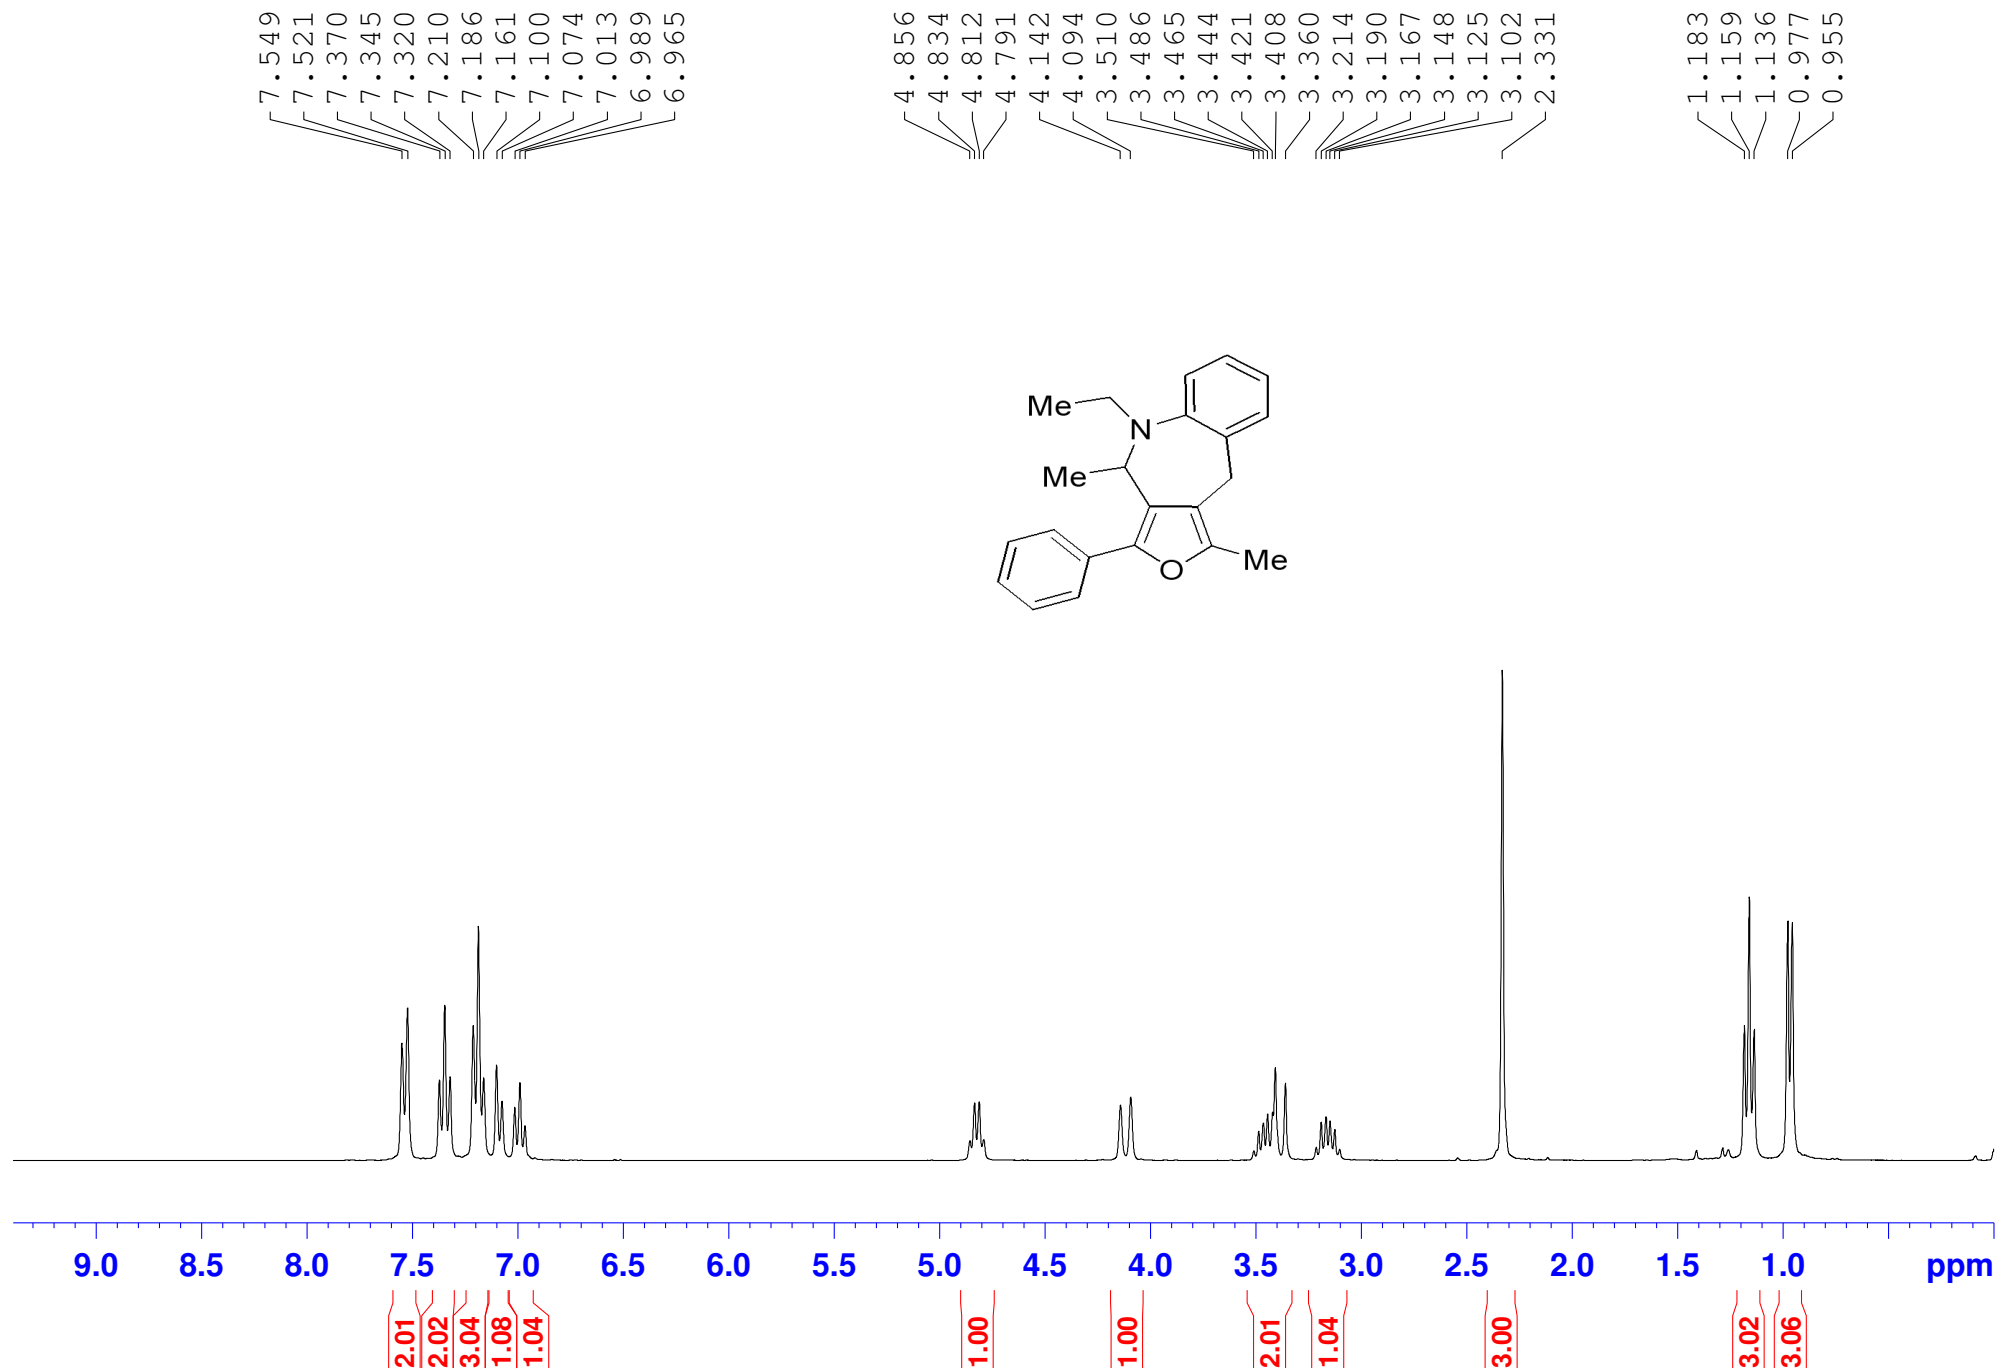



147.08  
144.66  
144.12  
137.77  
132.18  
128.42  
126.47  
126.26  
125.51  
125.09  
124.15  
123.47  
117.35

77.42  
77.00  
76.58

54.33

47.01

29.95

16.15  
14.51  
11.45

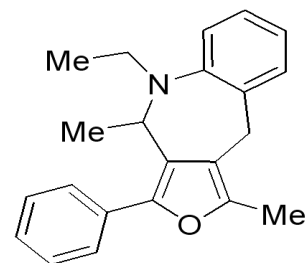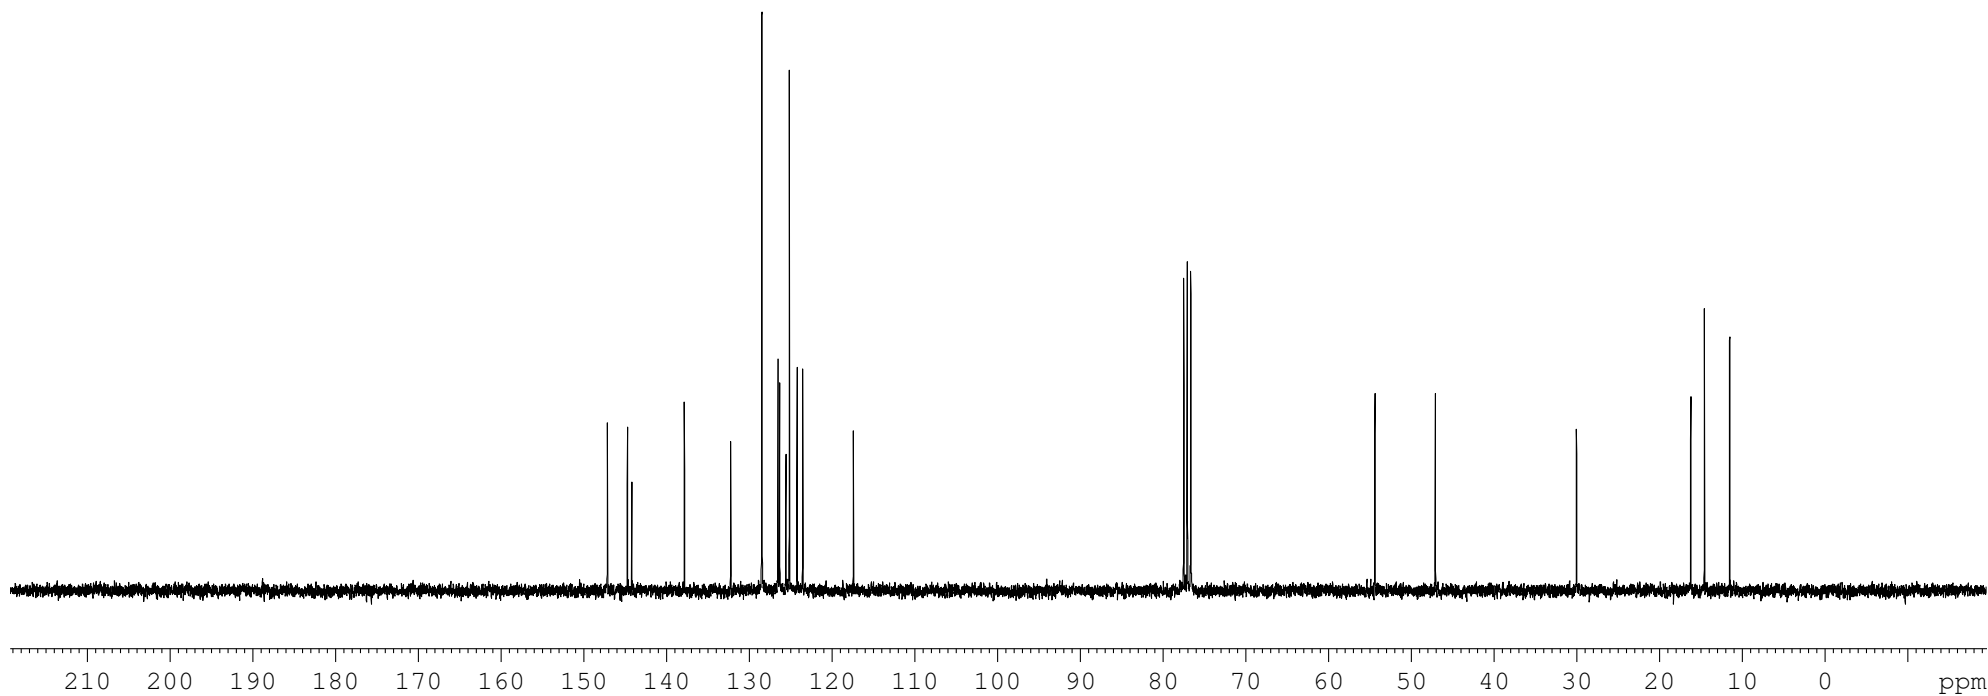

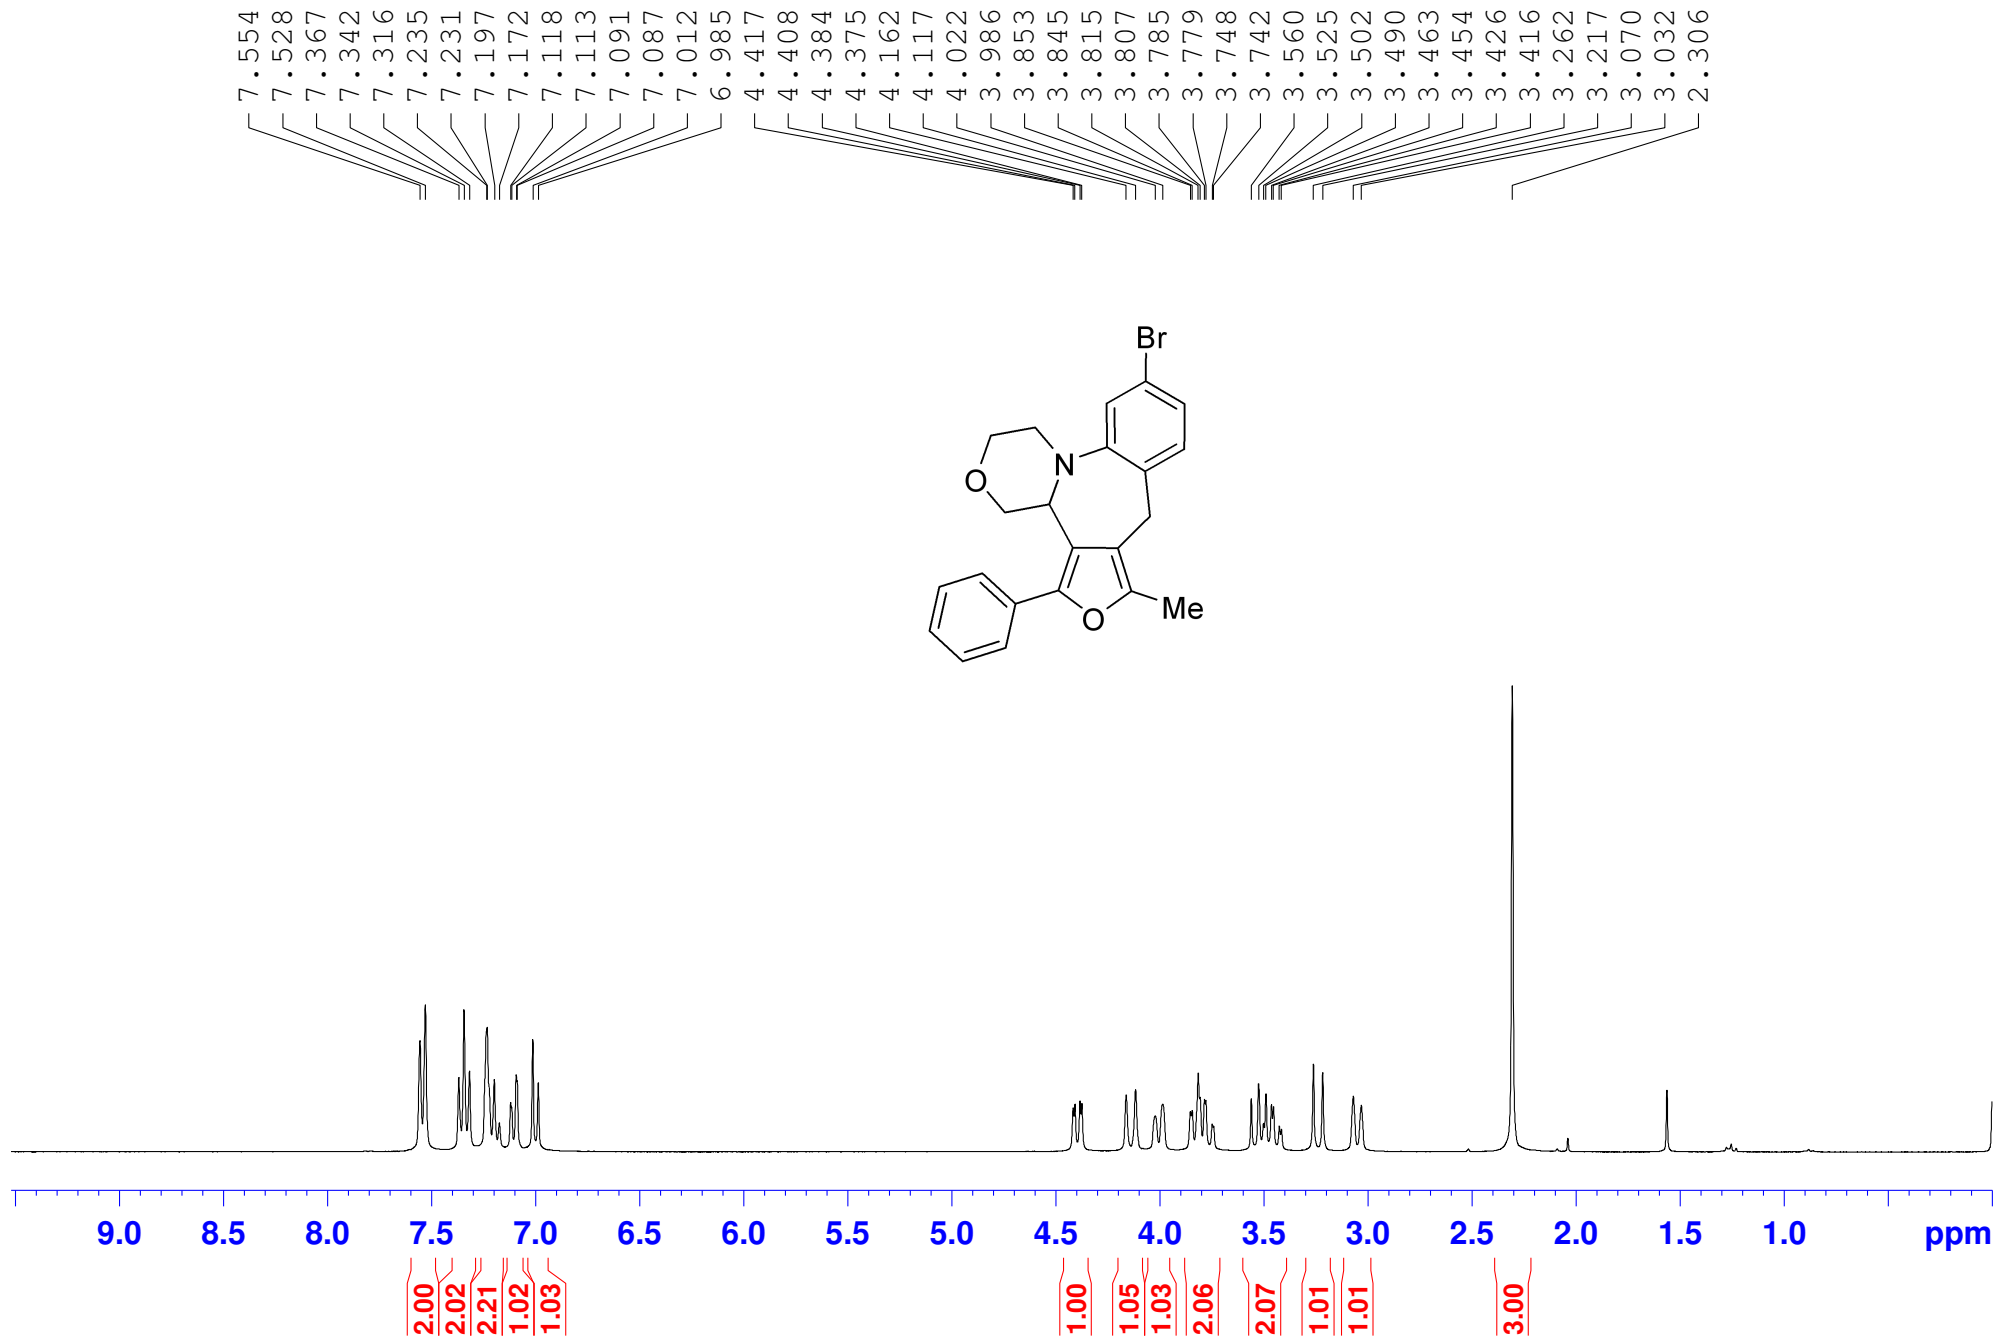

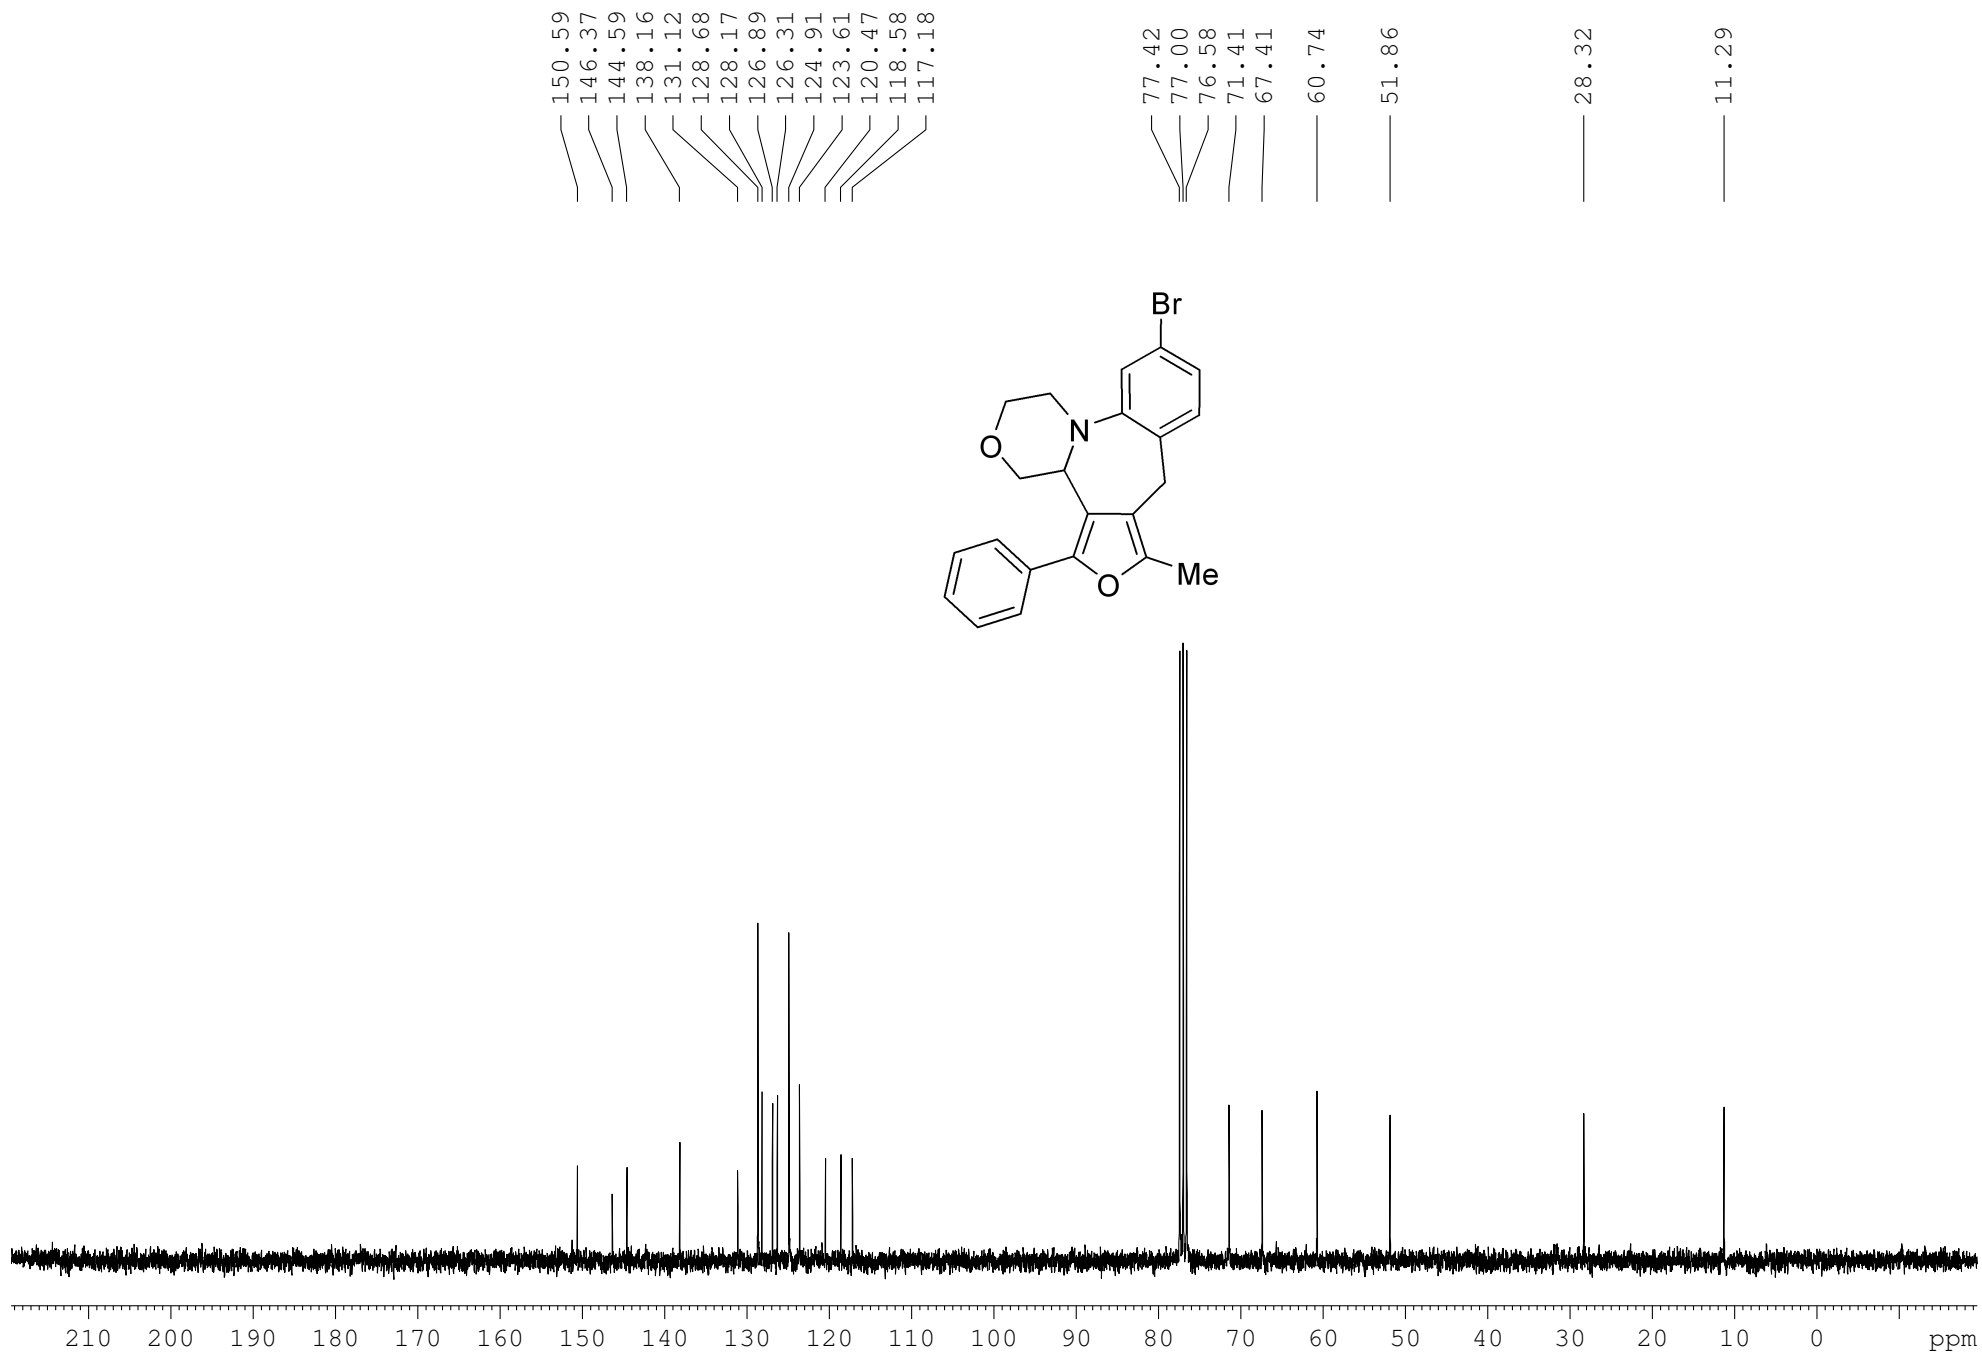

7.699  
7.674  
7.529  
7.503  
7.484  
7.458  
7.376  
7.351  
7.303  
7.274  
7.260  
7.215  
7.188  
7.173  
6.992  
6.964

4.430  
4.386  
4.231  
4.199  
3.764  
3.720  
3.337  
3.301  
3.196  
3.166  
3.128

2.368  
1.915  
1.879  
1.832  
1.779  
1.738  
1.602  
1.563  
1.271

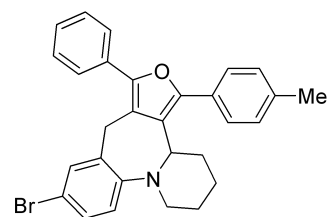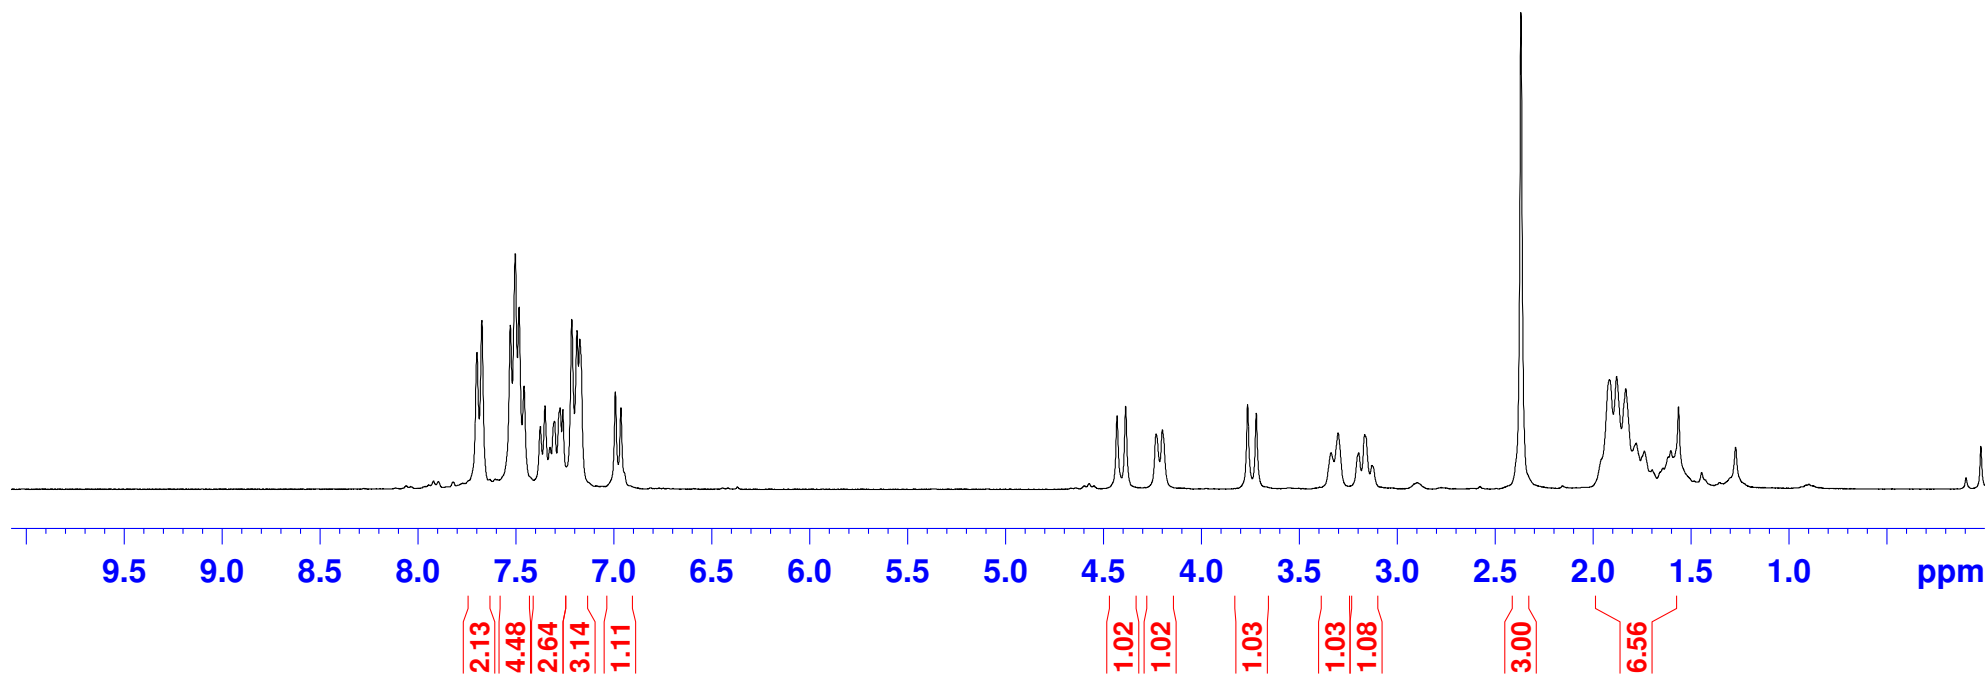

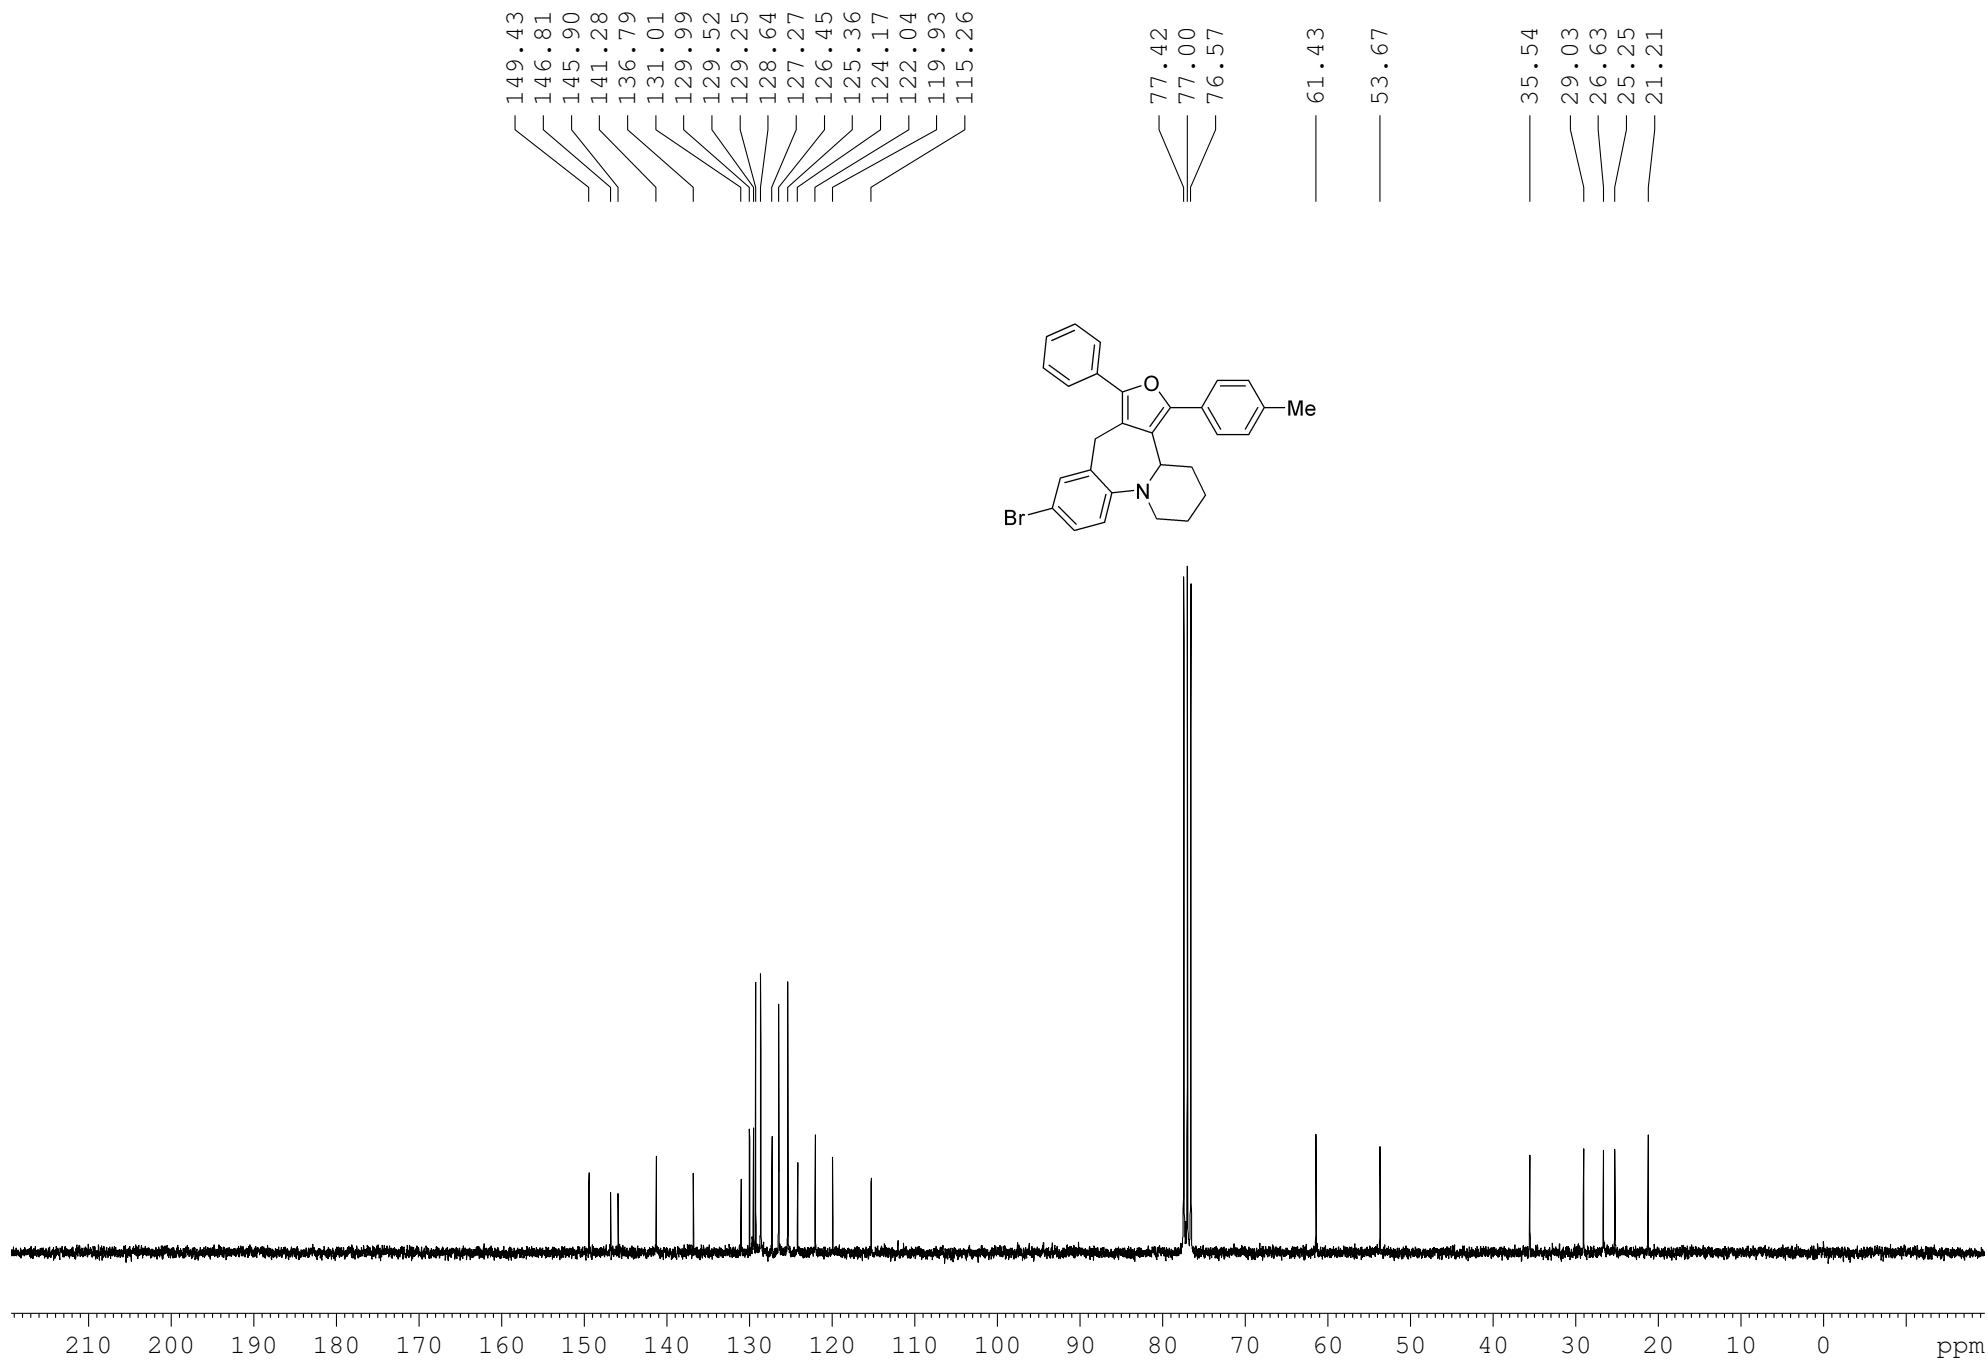

7.470  
7.444  
7.426  
7.423  
7.325  
7.303  
7.298  
7.292  
7.267  
7.260  
7.240  
7.179  
7.158  
7.069  
7.062  
7.038  
4.601  
4.555  
4.057  
4.049  
4.020  
4.012  
3.988  
3.957  
3.870  
3.862  
3.830  
3.825  
3.793  
3.694  
3.664  
3.316  
3.305  
3.296  
3.278  
3.267  
3.251  
3.240  
3.229  
3.093  
3.054  
2.234

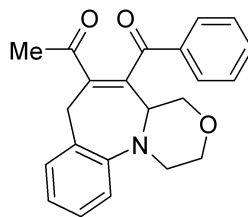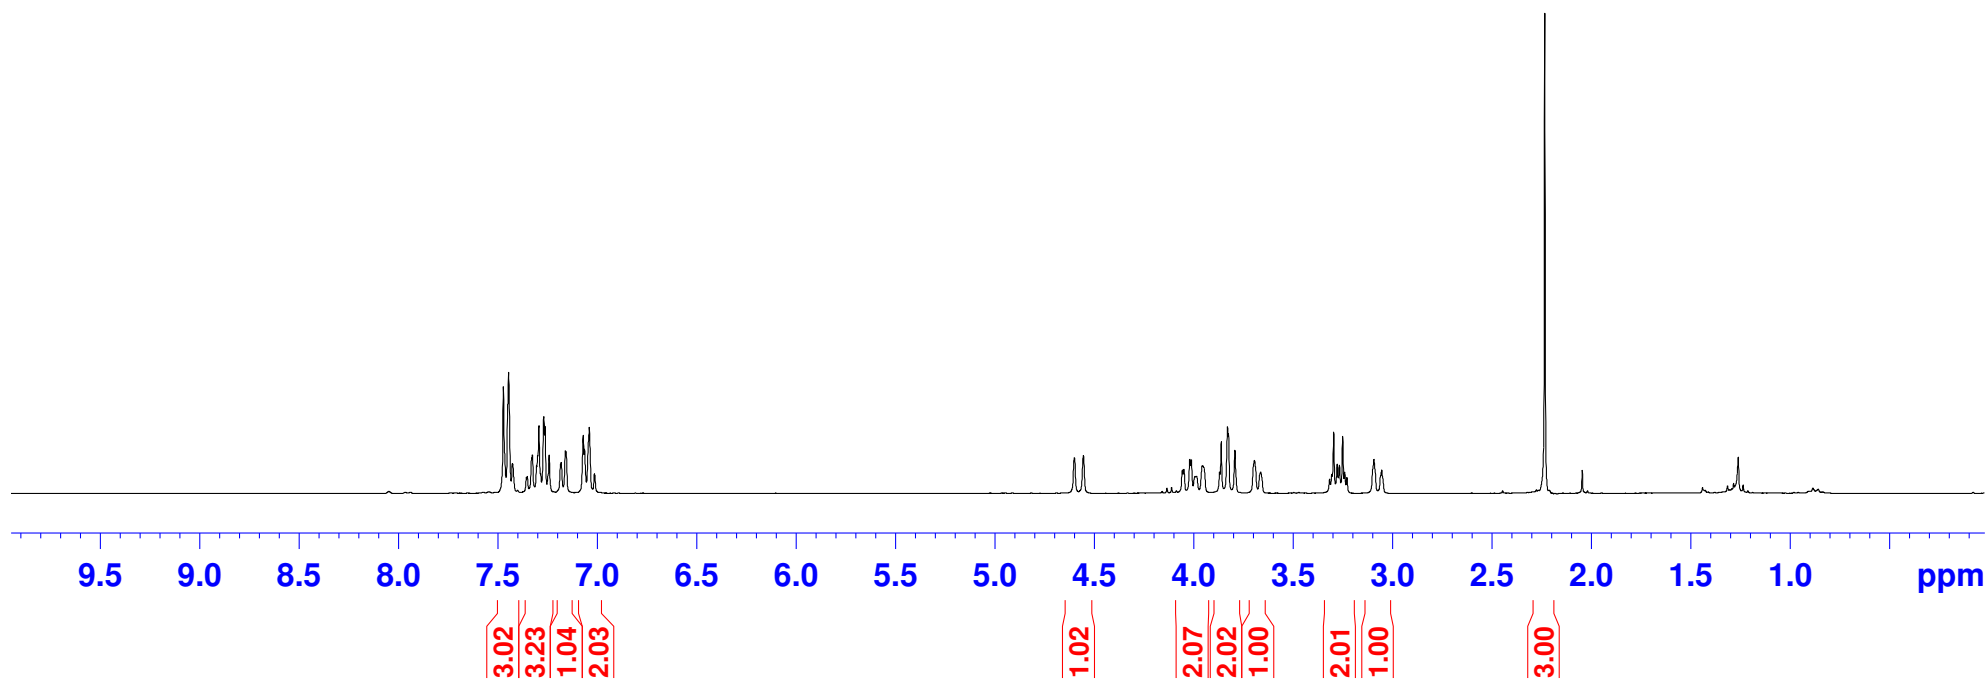

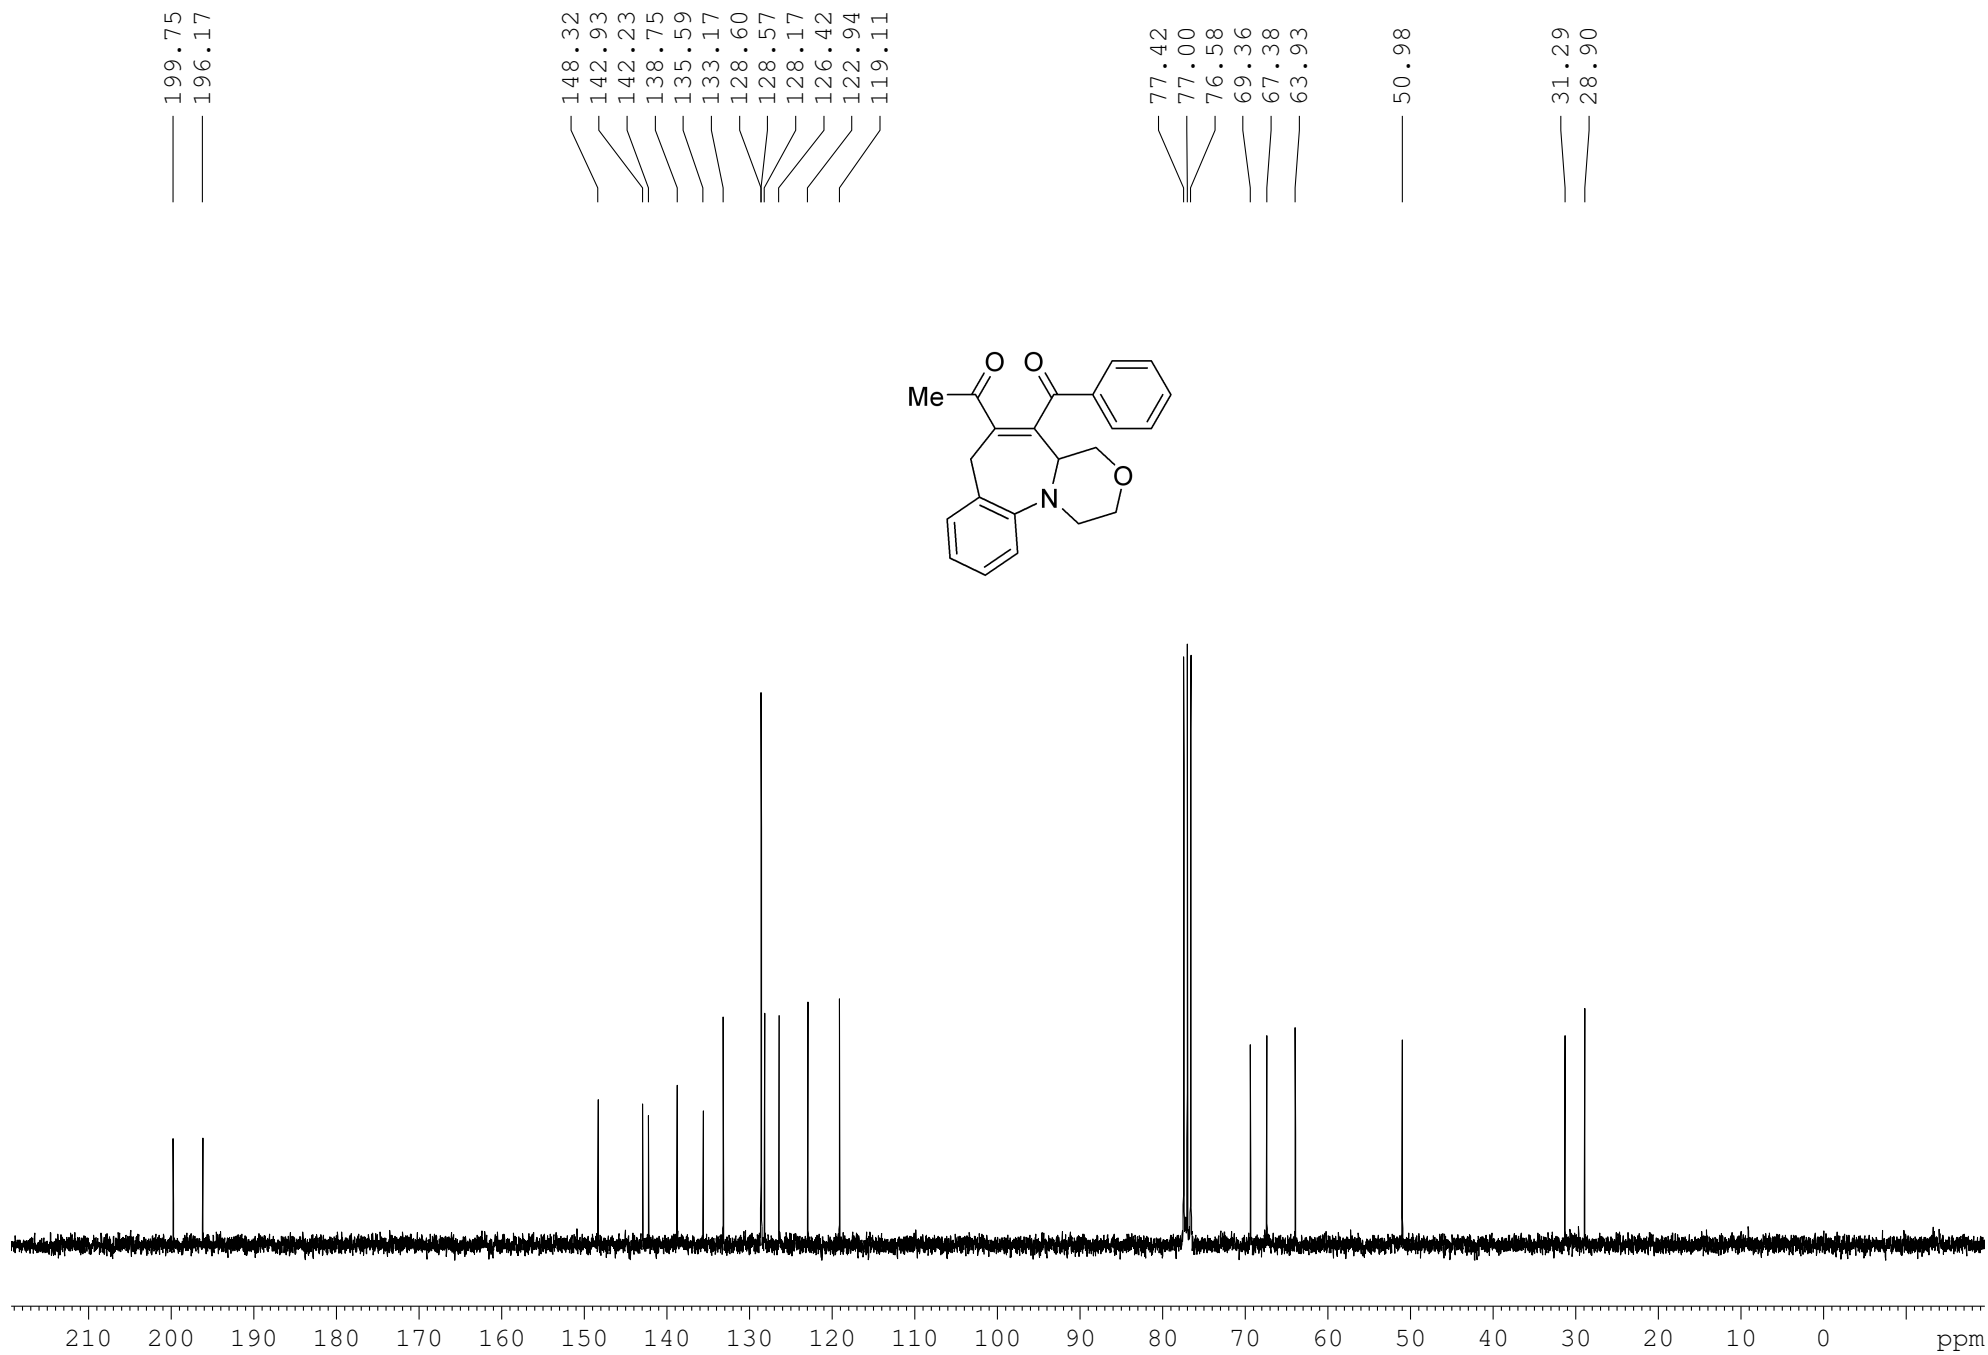

Supplement: c0cc01946a.pdf [file c0cc01946a.pdf]
